# Supplementary material for: Chemical evolution of biomolecule building blocks. Can thermodynamics explain the accumulation of glycine in the prebiotic ocean?
Source: Royal Society of Chemistry journal article supplement (doi:10.1039/c0cp02687e), 2011-01-01
Supplement: c0cp02687e.pdf [file c0cp02687e.pdf]

# Chemical Evolution of Biomolecule Building Blocks. Can Thermodynamics Explain The Accumulation of Glycine in Prebiotic Ocean?

Milán Szőri<sup>a,\*</sup>, Balázs Jójárt<sup>a</sup>, Róbert Izsák<sup>a,b</sup>, Kornél Szőri<sup>c</sup>, Imre G. Csizmadia<sup>a,d</sup> and Béla  
Viskolcz<sup>a</sup>

<sup>a</sup> Department of Chemical Informatics, Faculty of Education, University of Szeged,  
Szeged, Boldogasszony sgt. 6. Hungary 6725

<sup>b</sup> Lehrstuhl für Theoretische Chemie, Institute für Physicalische und Theoretische Chemie, Universität  
Bonn, Wegelerstraße 12, D-53115 Bonn, Germany

<sup>c</sup> Stereochemistry Research Group of the Hungarian Academy of Sciences,  
Dóm tér 8, H-6720 Szeged, Hungary

<sup>d</sup> Department of Chemistry, University of Toronto, Toronto ON, Canada M5S 3H6

## Supplementary Information

(\*) Corresponding author

Milán Szőri,

Fax: +36 62 420 953,

e-mail: milan@jgypk.u-szeged.hu

Manuscript submitted to

*Phys. Chem. Chem. Phys.*

28 Nov, 2010

### Selection of the interval of relative Gibbs free energy studied

There is no way to discuss all the possible C<sub>2</sub>H<sub>5</sub>NO<sub>2</sub> species characterized in our calculations and we had to provide a reasonable (and necessarily arbitrary) truncation for the number of species discussed. We decided it should be based on thermochemical considerations as it is presented below.

A thermodynamic equilibrium between the isomer having the lowest Gibbs free energy, N1, and the one with the x<sup>th</sup> lowest Gibbs free energy, Nx can be written as:

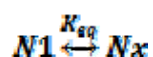

Only those species are considered which underpopulate N1 by a factor of 1/(6.022·10<sup>23</sup>) (=1/N<sub>A</sub>). This simply means that only one molecule of Nx can be found in 1 mol C<sub>2</sub>H<sub>5</sub>NO<sub>2</sub>, which should be a reasonable lower limit for considering all the important isomers.

The equilibrium constant, K<sub>eq</sub>, can be expressed as:

$$\left( e^{-\frac{\Delta G^0}{RT}} \right) = K_{eq} = \frac{[Nx]}{[N1]} = \frac{1}{6.22 \cdot 10^{23}} = 1.66 \cdot 10^{-24}$$

Then, relative Gibbs free energy at 25°C, Δ<sub>rel</sub>G<sup>0</sup>(g), can be calculated as:

$$\Delta_{rel}G^0 = -RT \ln K_{eq} = -8.314 \frac{J}{mol \cdot K} \cdot 298.15K \cdot \ln \left( \frac{1}{6.22 \cdot 10^{23}} \right)$$
$$\Delta_{rel}G^0 = 135.7 \frac{kJ}{mol}$$

## Coordinates and energies

### Notation:

**DE(MP2)**=E(MP2/G3MP2Large)-E(MP2/6-31G(d)) in Hartree

**E(QCISD(T))**= E(QCISD(T)/6-31G(d)) in Hartree

**E(ZPE)**=zero-point energy scaled by 0.96 in Hartree

**E(HLC)**=High level correction in Hartree

**dfH**=G3MP2B3 heat of formation in kJ/mol (calculated at 1 atm and 298.15 K)

**S(scaled)**=Entropy (in J/molK) calculated with scaled (by 0.96) B3LYP/6-31G(d) vibrational frequencies

**S(Unscaled)** =Entropy (in J/molK) calculated with UNscaled B3LYP/6-31G(d) vibrational frequencies

**G**=G3MP2B3 sum of electronic and thermal Free Energies in Hartree (calculated at 1 atm and 298.15 K)

**Cv(Unscaled)**=Heat capacity in J/molK calculated with UNscaled B3LYP/6-31G(d) vibrational frequencies

### Coordinates and energies for the 18 lowest lying **gas** phase structures of C<sub>2</sub>H<sub>5</sub>NO<sub>2</sub>

**N1 val+05\_120 DE(MP2)=-0.333434 E(QCISD(T))=-283.671467 E(ZPE)=0.074033 E(HLC)=-0.150615**

|   |          |          |          |
|---|----------|----------|----------|
| C | -0.22845 | 2.36132  | 0.60173  |
| C | 0.00584  | -1.22903 | 0.27046  |
| N | 0.36535  | -0.10219 | -0.59697 |
| O | -0.96666 | 1.86176  | 1.36041  |
| O | 0.48644  | 2.94981  | -0.11362 |
| H | -1.04681 | -1.13658 | 0.55547  |
| H | 0.59630  | -1.17392 | 1.19072  |
| H | 0.15675  | -2.22806 | -0.17120 |
| H | -0.15330 | -0.15833 | -1.47191 |
| H | 1.34974  | -0.15557 | -0.85268 |

**N2 val+05\_16 DE(MP2)=-0.336812 E(QCISD(T))=-283.666875 E(ZPE)=0.076835 E(HLC)=-0.150615**

|   |          |          |          |
|---|----------|----------|----------|
| C | 0.23264  | 0.63759  | 0.17164  |
| C | -0.50662 | -1.74014 | -0.10402 |
| N | 0.49073  | -0.68610 | -0.01032 |
| O | 1.07220  | 1.49383  | 0.38740  |
| O | -1.10052 | 0.91278  | 0.06223  |
| H | -1.33313 | -1.40818 | -0.73466 |
| H | -0.04786 | -2.61848 | -0.56622 |
| H | -0.91114 | -2.02874 | 0.87569  |
| H | 1.45169  | -0.93547 | 0.17123  |
| H | -1.16068 | 1.87660  | 0.17682  |

**N3 val+03\_47 DE(MP2)=-0.334791 E(QCISD(T))=-283.663561 E(ZPE)=0.076631 E(HLC)=-0.150615**

|   |          |          |          |
|---|----------|----------|----------|
| C | 0.50274  | 0.20616  | 0.02556  |
| C | -1.81810 | -0.12827 | -0.12359 |
| N | 1.71036  | -0.20454 | -0.47448 |
| O | 0.34265  | 1.10678  | 0.82534  |
| O | -0.50202 | -0.51908 | -0.53460 |
| H | -2.01811 | 0.91039  | -0.40065 |
| H | -2.49825 | -0.80017 | -0.64896 |
| H | -1.93533 | -0.23489 | 0.95831  |
| H | 2.52562  | 0.10816  | 0.03035  |
| H | 1.76345  | -1.09795 | -0.94138 |

**N4 val+03\_37 DE(MP2)=-0.342478 E(QCISD(T))=-283.646569 E(ZPE)=0.075636 E(HLC)=-0.150615**

|   |          |          |          |
|---|----------|----------|----------|
| C | 0.10286  | 0.03673  | -0.01242 |
| C | -1.41972 | -0.03714 | 0.15927  |
| N | 0.75391  | -1.13894 | -0.20263 |
| O | 0.66926  | 1.12377  | 0.02600  |
| O | -1.93908 | 1.24903  | 0.34381  |

Supplementary Material (ESI) for PCCP  
This journal is © the Owner Societies 2011

|   |          |          |          |
|---|----------|----------|----------|
| H | -1.85740 | -0.51680 | -0.73179 |
| H | -1.65140 | -0.68503 | 1.02081  |
| H | 1.75760  | -1.12773 | -0.31694 |
| H | 0.27307  | -2.02561 | -0.22901 |
| H | -1.15609 | 1.83660  | 0.30870  |

**N5 val+05\_118 DE(MP2)=-0.339888 E(QCISD(T))=-283.651387 E(ZPE)=0.077490 E(HLC)=-0.150615**

|   |          |          |          |
|---|----------|----------|----------|
| C | 0.50232  | 0.79255  | 0.25601  |
| C | -0.60469 | -0.24574 | -0.00165 |
| N | -0.02739 | -1.58823 | -0.16819 |
| O | 0.30499  | 1.98287  | 0.21376  |
| O | 1.68841  | 0.24300  | 0.55820  |
| H | -1.25635 | -0.23853 | 0.87889  |
| H | -1.20745 | 0.10343  | -0.84800 |
| H | -0.62955 | -2.30952 | 0.21820  |
| H | 1.53810  | -0.73418 | 0.49585  |
| H | 0.11321  | -1.80796 | -1.15146 |

**N7 val+05\_128 DE(MP2)=-0.338536 E(QCISD(T))=-283.632342 E(ZPE)=0.072367 E(HLC)=-0.150615**

|   |          |          |          |
|---|----------|----------|----------|
| C | 1.55331  | -2.12600 | 0.00636  |
| C | -1.61829 | 1.20528  | 0.29045  |
| N | 0.43198  | -1.72678 | -0.22509 |
| O | 2.58625  | -2.64604 | 0.23835  |
| O | -0.63892 | 0.87016  | -0.69673 |
| H | -2.05556 | 2.19321  | 0.09812  |
| H | -2.41993 | 0.45740  | 0.34802  |
| H | -1.09547 | 1.23377  | 1.24842  |
| H | -1.07865 | 0.82669  | -1.55989 |
| H | 0.12319  | -0.76248 | -0.39332 |

**N8 val+07\_21 DE(MP2)=-0.338224 E(QCISD(T))=-283.642556 E(ZPE)=0.077184 E(HLC)=-0.150615**

|   |          |          |          |
|---|----------|----------|----------|
| C | -0.17821 | -1.05349 | 0.65131  |
| C | -0.79094 | 1.05815  | -0.38120 |
| N | -1.13843 | -0.29434 | 0.05685  |
| O | 0.93611  | -0.63504 | 0.93611  |
| O | 0.24162  | 1.09105  | -1.33077 |
| H | -1.67578 | 1.49910  | -0.84382 |
| H | -0.52980 | 1.63182  | 0.51619  |
| H | -1.92888 | -0.76649 | -0.36293 |
| H | -0.50333 | -2.08777 | 0.87178  |
| H | 1.03472  | 0.78151  | -0.85782 |

**N9 val+03\_43 DE(MP2)=-0.334988 E(QCISD(T))=-283.640165 E(ZPE)=0.077089 E(HLC)=-0.150615**

|   |          |          |          |
|---|----------|----------|----------|
| C | -0.97384 | 1.13573  | -0.04638 |
| C | -0.42779 | -1.14662 | -0.23683 |
| N | 0.87678  | -1.11215 | 0.34839  |
| O | -0.92978 | 1.08239  | 1.16166  |
| O | -0.75293 | 0.12055  | -0.88899 |
| H | -1.21363 | 2.04373  | -0.62127 |
| H | -1.24299 | -1.34740 | 0.46774  |
| H | -0.45687 | -1.86771 | -1.05406 |
| H | 0.84916  | -0.83138 | 1.32248  |
| H | 1.37218  | -1.99014 | 0.24717  |

**N10 val+05\_125 DE(MP2)=-0.333046 E(QCISD(T))=-283.635533 E(ZPE)=0.073843 E(HLC)=-0.150615**

|   |          |          |          |
|---|----------|----------|----------|
| C | -1.05381 | 1.55421  | 0.34962  |
| C | 0.77949  | -1.58273 | -0.33983 |
| N | -0.12591 | -1.70713 | 0.54575  |
| O | -0.15249 | 1.44602  | -0.45873 |
| O | -1.54601 | 0.59618  | 1.12232  |
| H | -1.58227 | 2.50313  | 0.53502  |
| H | 0.91579  | -0.59822 | -0.78878 |
| H | 1.42456  | -2.40270 | -0.67376 |
| H | -1.05430 | -0.26770 | 0.94360  |
| H | -0.19293 | -2.65778 | 0.91899  |

**N11 val+07\_114 DE(MP2)=-0.331613 E(QCISD(T))=-283.632471 E(ZPE)=0.072677 E(HLC)=-0.150615**

|   |          |          |          |
|---|----------|----------|----------|
| C | 0.49415  | 2.10323  | 0.88994  |
| C | -0.26469 | -1.48680 | 0.30787  |
| N | -0.32511 | -0.77709 | -0.84152 |
| O | 0.00284  | -1.02966 | 1.41179  |
| O | 0.29211  | 2.08597  | -0.30926 |
| H | 0.75472  | 3.04914  | 1.40500  |
| H | -0.48708 | -2.56166 | 0.16012  |
| H | 0.42541  | 1.18592  | 1.49961  |
| H | -0.55312 | -1.23063 | -1.71369 |
| H | -0.13834 | 0.22748  | -0.83176 |

Supplementary Material (ESI) for PCCP  
This journal is © the Owner Societies 2011

|            |                   |                          |                                |                        |                         |
|------------|-------------------|--------------------------|--------------------------------|------------------------|-------------------------|
| <b>N12</b> | <b>val+05_98</b>  | <b>DE(MP2)=-0.328101</b> | <b>E(QCISD(T))=-283.627829</b> | <b>E(ZPE)=0.065878</b> | <b>E(HLC)=-0.150615</b> |
| C          | 1.25491           | 0.31327                  | -0.07308                       |                        |                         |
| C          | -0.59944          | 1.92796                  | -0.03851                       |                        |                         |
| N          | -0.09083          | 0.63638                  | -0.00967                       |                        |                         |
| O          | -1.77877          | 2.18777                  | 0.01795                        |                        |                         |
| O          | 1.68224           | -0.81914                 | -0.04638                       |                        |                         |
| H          | 1.90237           | 1.20514                  | -0.15121                       |                        |                         |
| H          | 0.19432           | 2.69274                  | -0.11885                       |                        |                         |
| H          | -0.75741          | -0.12807                 | 0.06352                        |                        |                         |
| H          | -0.64367          | -3.18508                 | 0.21868                        |                        |                         |
| H          | -0.05303          | -2.73628                 | 0.15804                        |                        |                         |
| <b>N13</b> | <b>val+07_12</b>  | <b>DE(MP2)=-0.337392</b> | <b>E(QCISD(T))=-283.623541</b> | <b>E(ZPE)=0.073309</b> | <b>E(HLC)=-0.150615</b> |
| C          | 0.34486           | 1.72945                  | 2.13304                        |                        |                         |
| C          | 0.14459           | -0.77347                 | -0.43203                       |                        |                         |
| N          | -0.34281          | 0.56230                  | -0.76601                       |                        |                         |
| O          | 0.38955           | 2.86490                  | 2.09498                        |                        |                         |
| O          | -0.30096          | -1.14752                 | 0.84647                        |                        |                         |
| H          | -0.20803          | -1.57140                 | -1.10314                       |                        |                         |
| H          | 1.24480           | -0.73809                 | -0.50072                       |                        |                         |
| H          | -1.34784          | 0.53399                  | -0.93164                       |                        |                         |
| H          | 0.09933           | 0.90920                  | -1.61584                       |                        |                         |
| H          | -0.05610          | -0.41605                 | 1.44058                        |                        |                         |
| <b>N14</b> | <b>val+03_12</b>  | <b>DE(MP2)=-0.342479</b> | <b>E(QCISD(T))=-283.623134</b> | <b>E(ZPE)=0.075148</b> | <b>E(HLC)=-0.150615</b> |
| C          | 0.43418           | -0.32829                 | 0.18268                        |                        |                         |
| C          | -1.90979          | -0.62817                 | 0.12905                        |                        |                         |
| N          | -0.55989          | -1.08191                 | 0.36729                        |                        |                         |
| O          | 0.48805           | 0.97447                  | -0.24405                       |                        |                         |
| O          | 1.68484           | -0.77647                 | 0.41441                        |                        |                         |
| H          | -2.04338          | 0.45986                  | -0.03407                       |                        |                         |
| H          | -2.53743          | -0.89094                 | 0.98822                        |                        |                         |
| H          | -2.33034          | -1.13872                 | -0.74685                       |                        |                         |
| H          | -0.41308          | 1.28781                  | -0.42342                       |                        |                         |
| H          | 2.30103           | -0.05534                 | 0.20665                        |                        |                         |
| <b>N15</b> | <b>val+05_13</b>  | <b>DE(MP2)=-0.346204</b> | <b>E(QCISD(T))=-283.620087</b> | <b>E(ZPE)=0.075758</b> | <b>E(HLC)=-0.150615</b> |
| C          | 0.02001           | -0.29982                 | 0.29977                        |                        |                         |
| C          | 0.98266           | 0.85876                  | 0.11426                        |                        |                         |
| N          | 0.46291           | -1.48390                 | 0.22528                        |                        |                         |
| O          | 2.28769           | 0.41686                  | -0.12484                       |                        |                         |
| O          | -1.28358          | 0.00611                  | 0.53921                        |                        |                         |
| H          | 0.61975           | 1.48056                  | -0.72334                       |                        |                         |
| H          | 0.94248           | 1.49138                  | 1.01879                        |                        |                         |
| H          | 2.23182           | -0.56058                 | -0.10798                       |                        |                         |
| H          | -0.26799          | -2.18397                 | 0.36522                        |                        |                         |
| H          | -1.40426          | 0.97050                  | 0.55563                        |                        |                         |
| <b>N16</b> | <b>val+05_132</b> | <b>DE(MP2)=-0.333273</b> | <b>E(QCISD(T))=-283.610066</b> | <b>E(ZPE)=0.066053</b> | <b>E(HLC)=-0.150615</b> |
| C          | 1.24215           | 1.92149                  | -0.19701                       |                        |                         |
| C          | 1.05935           | -1.54750                 | -0.70517                       |                        |                         |
| N          | -1.69182          | 0.57788                  | 0.38046                        |                        |                         |
| O          | 0.78225           | 2.92569                  | 0.07921                        |                        |                         |
| O          | 0.86260           | -2.73138                 | -0.86302                       |                        |                         |
| H          | 0.26790           | -0.84464                 | -0.37811                       |                        |                         |
| H          | -1.93287          | 1.55188                  | 0.55973                        |                        |                         |
| H          | -2.34735          | 0.24735                  | -0.32652                       |                        |                         |
| H          | -1.91738          | 0.06691                  | 1.23299                        |                        |                         |
| H          | 2.05727           | -1.08958                 | -0.88107                       |                        |                         |
| <b>N17</b> | <b>val+03_28</b>  | <b>DE(MP2)=-0.339943</b> | <b>E(QCISD(T))=-283.627047</b> | <b>E(ZPE)=0.076660</b> | <b>E(HLC)=-0.150615</b> |
| C          | 0.52342           | -0.28199                 | -0.34110                       |                        |                         |
| C          | -1.82134          | -0.55774                 | -0.33149                       |                        |                         |
| N          | 0.58861           | 0.80321                  | 0.32048                        |                        |                         |
| O          | -0.53532          | -1.02983                 | -0.71902                       |                        |                         |
| O          | 1.63321           | -0.89064                 | -0.80055                       |                        |                         |
| H          | -2.02779          | 0.42924                  | -0.76294                       |                        |                         |
| H          | -2.53363          | -1.28367                 | -0.72481                       |                        |                         |
| H          | -1.91315          | -0.50878                 | 0.76037                        |                        |                         |
| H          | -0.32111          | 1.15583                  | 0.60739                        |                        |                         |
| H          | 2.36990           | -0.32594                 | -0.50982                       |                        |                         |
| <b>N18</b> | <b>val+07_107</b> | <b>DE(MP2)=-0.340010</b> | <b>E(QCISD(T))=-283.608598</b> | <b>E(ZPE)=0.068409</b> | <b>E(HLC)=-0.150615</b> |
| C          | 3.07641           | -0.68082                 | -1.44404                       |                        |                         |
| C          | -0.08019          | 0.64201                  | 0.68128                        |                        |                         |
| N          | -0.10988          | -0.43171                 | 0.00141                        |                        |                         |

|   |          |          |          |
|---|----------|----------|----------|
| O | 4.10271  | -0.80790 | -1.91396 |
| O | -2.77895 | -1.00600 | 0.89293  |
| H | 0.78476  | 1.31400  | 0.75096  |
| H | -0.97582 | 0.91961  | 1.24026  |
| H | -1.89394 | -1.12606 | 0.49033  |
| H | 0.78080  | -0.60045 | -0.47701 |
| H | -3.32791 | -0.73176 | 0.14373  |

### Coordinates and energies for the 18 lowest lying water phase structures of C<sub>2</sub>H<sub>5</sub>NO<sub>2</sub>

**N1 val+05\_120 DE(MP2)=-0.332803 E(QCISD(T))=-283.675892 E(ZPE)=0.073731 E(HLC)=-0.150615**

|   |          |          |          |
|---|----------|----------|----------|
| C | -0.19672 | 2.35831  | 0.63269  |
| C | -0.03121 | -1.23991 | 0.23537  |
| N | 0.37195  | -0.08067 | -0.57116 |
| O | -0.69467 | 1.85205  | 1.56326  |
| O | 0.27688  | 2.96899  | -0.24638 |
| H | -1.10754 | -1.18599 | 0.42911  |
| H | 0.48029  | -1.20017 | 1.20270  |
| H | 0.18299  | -2.21880 | -0.22217 |
| H | -0.08660 | -0.12612 | -1.48035 |
| H | 1.36983  | -0.13849 | -0.77067 |

**N2 val+05\_16 DE(MP2)=-0.337361 E(QCISD(T))=-283.676410 E(ZPE)=0.076473 E(HLC)=-0.150615**

|   |          |          |          |
|---|----------|----------|----------|
| C | 0.23367  | 0.63390  | 0.17683  |
| C | -0.52833 | -1.73687 | -0.04092 |
| N | 0.39398  | -0.69309 | 0.38732  |
| O | 1.05706  | 1.49887  | 0.45499  |
| O | -0.97792 | 0.91803  | -0.37525 |
| H | -1.54477 | -1.50290 | 0.28438  |
| H | -0.52985 | -1.86695 | -1.12997 |
| H | -0.22108 | -2.67548 | 0.42391  |
| H | 1.31221  | -0.95860 | 0.71230  |
| H | -1.00768 | 1.88678  | -0.46379 |

**N3 val+05\_65 DE(MP2)=-0.334809 E(QCISD(T))=-283.672572 E(ZPE)=0.076384 E(HLC)=-0.150615**

|   |          |          |          |
|---|----------|----------|----------|
| C | 0.56419  | -0.46168 | -0.17224 |
| C | -0.96652 | 1.30671  | 0.13752  |
| N | 0.90707  | -1.70953 | 0.25968  |
| O | -0.48178 | 0.01756  | 0.54524  |
| O | 1.08996  | 0.13139  | -1.10239 |
| H | -0.18300 | 2.06292  | 0.23179  |
| H | -1.32011 | 1.27836  | -0.89638 |
| H | -1.79218 | 1.53267  | 0.81248  |
| H | 1.80764  | -2.05509 | -0.03977 |
| H | 0.58803  | -2.01171 | 1.17006  |

**N4 val+03\_37 DE(MP2)=-0.342664 E(QCISD(T))=-283.659246 E(ZPE)=0.075704 E(HLC)=-0.150615**

|   |          |          |          |
|---|----------|----------|----------|
| C | 0.10039  | 0.03003  | -0.01472 |
| C | -1.42156 | -0.04450 | 0.15881  |
| N | 0.75376  | -1.13154 | -0.20097 |
| O | 0.65470  | 1.13329  | 0.02104  |
| O | -1.93241 | 1.25416  | 0.35219  |
| H | -1.86334 | -0.51294 | -0.73331 |
| H | -1.65693 | -0.69096 | 1.01706  |
| H | 1.75815  | -1.12675 | -0.31839 |
| H | 0.27727  | -2.02241 | -0.22153 |
| H | -1.13703 | 1.82653  | 0.30562  |

**N5 val+05\_78 DE(MP2)=-0.339841 E(QCISD(T))=-283.660883 E(ZPE)=0.076574 E(HLC)=-0.150615**

|   |          |          |          |
|---|----------|----------|----------|
| C | 0.51755  | 0.47160  | -0.69470 |
| C | -0.00513 | -0.44336 | 0.39336  |
| N | 0.38765  | -1.82508 | 0.13484  |
| O | 0.94739  | 0.10950  | -1.77072 |
| O | 0.40940  | 1.76967  | -0.34136 |
| H | 0.71798  | 2.30359  | -1.09877 |
| H | -1.09399 | -0.26470 | 0.45070  |
| H | 0.40767  | -0.11213 | 1.35271  |
| H | -0.07937 | -2.42694 | 0.81082  |
| H | 0.03215  | -2.09974 | -0.77978 |

**N6 val+05\_118 DE(MP2)=-0.340673 E(QCISD(T))=-283.660471 E(ZPE)=0.078079 E(HLC)=-0.150615**

|   |          |          |          |
|---|----------|----------|----------|
| C | 0.55882  | 0.86631  | 0.32186  |
| C | -0.57479 | -0.14691 | -0.04598 |
| N | 0.07491  | -1.50171 | -0.10564 |

Supplementary Material (ESI) for PCCP  
This journal is © the Owner Societies 2011

|   |          |          |          |
|---|----------|----------|----------|
| O | 0.22070  | 2.05751  | 0.40970  |
| O | 1.69509  | 0.32733  | 0.48681  |
| H | -1.35759 | -0.15366 | 0.71257  |
| H | -1.01722 | 0.08841  | -1.01393 |
| H | -0.29715 | -2.17009 | 0.57181  |
| H | 1.07565  | -1.23364 | 0.14460  |
| H | 0.04318  | -1.93585 | -1.03021 |

**N7 val+05\_128 DE(MP2)=-0.337731 E(QCISD(T))=-283.641414 E(ZPE)=0.072179 E(HLC)=-0.150615**

|   |          |          |          |
|---|----------|----------|----------|
| C | 1.54964  | -1.62327 | -0.90501 |
| C | -1.46307 | 1.22007  | 0.14512  |
| N | 0.36085  | -1.75625 | -0.72911 |
| O | 2.70713  | -1.61523 | -1.15135 |
| O | -1.44576 | -0.13093 | 0.62816  |
| H | -0.48195 | 1.70009  | 0.24208  |
| H | -1.73334 | 1.17075  | -0.91149 |
| H | -2.21282 | 1.81543  | 0.67817  |
| H | -0.29502 | -1.14394 | -0.20854 |
| H | -1.19774 | -0.11152 | 1.56666  |

**N8 val+07\_4 DE(MP2)=-0.338837 E(QCISD(T))=-283.653204 E(ZPE)=0.076959 E(HLC)=-0.150615**

|   |          |          |          |
|---|----------|----------|----------|
| C | 0.22425  | -0.65910 | -0.63942 |
| C | -1.17367 | 1.06321  | 0.35515  |
| N | -1.07576 | -0.16558 | -0.19594 |
| O | 1.16765  | -0.74036 | 0.40616  |
| O | -0.21652 | 1.82896  | 0.48523  |
| H | -2.19468 | 1.32791  | 0.67795  |
| H | -1.87008 | -0.79078 | -0.15291 |
| H | 0.08485  | -1.66437 | -1.03760 |
| H | 1.31439  | 0.18191  | 0.68421  |
| H | 0.58279  | 0.00020  | -1.43912 |

**N9 val+03\_43 DE(MP2)=-0.334856 E(QCISD(T))=-283.648868 E(ZPE)=0.076876 E(HLC)=-0.150615**

|   |          |          |          |
|---|----------|----------|----------|
| C | -0.99775 | 1.15854  | -0.06946 |
| C | -0.41676 | -1.14002 | -0.20866 |
| N | 0.89180  | -1.11908 | 0.36735  |
| O | -1.00536 | 1.13080  | 1.14387  |
| O | -0.72838 | 0.13437  | -0.87935 |
| H | -1.22259 | 2.05443  | -0.66741 |
| H | -1.22222 | -1.31478 | 0.50899  |
| H | -0.47544 | -1.86251 | -1.02134 |
| H | 0.86281  | -0.99340 | 1.37355  |
| H | 1.41419  | -1.96133 | 0.15237  |

**N10 val+05\_125 DE(MP2)=-0.334485 E(QCISD(T))=-283.641171 E(ZPE)=0.072732 E(HLC)=-0.150615**

|   |          |          |          |
|---|----------|----------|----------|
| C | -1.59129 | 1.63193  | 0.20884  |
| C | 1.14359  | -2.02958 | 0.26650  |
| N | 0.07197  | -1.35751 | 0.13389  |
| O | -2.47146 | 0.86811  | -0.14229 |
| O | -0.33477 | 1.30995  | 0.47555  |
| H | -1.75104 | 2.71328  | 0.34774  |
| H | 2.05959  | -1.51461 | 0.55891  |
| H | 1.20958  | -3.10846 | 0.10408  |
| H | -0.19875 | 0.30684  | 0.34319  |
| H | -0.72533 | -1.93666 | -0.14220 |

**N11 val+07\_30 DE(MP2)=-0.335823 E(QCISD(T))=-283.633887 E(ZPE)=0.070800 E(HLC)=-0.150615**

|   |          |          |          |
|---|----------|----------|----------|
| C | -1.93612 | 0.43786  | -0.36718 |
| C | 1.60612  | -0.02275 | -0.11021 |
| N | 0.82165  | -0.87491 | 0.59247  |
| O | -1.68380 | 1.51727  | -0.85674 |
| O | 2.03668  | 1.04479  | 0.30883  |
| H | -1.97224 | -0.49027 | -0.96923 |
| H | 1.80669  | -0.38466 | -1.13477 |
| H | 0.65241  | -0.69969 | 1.57542  |
| H | -2.15544 | 0.31451  | 0.71070  |
| H | 0.60704  | -1.79507 | 0.23302  |

**N12 val+05\_98 DE(MP2)=-0.329105 E(QCISD(T))=-283.638255 E(ZPE)=0.066029 E(HLC)=-0.150615**

|   |          |          |          |
|---|----------|----------|----------|
| C | 1.18310  | 0.28916  | -0.01548 |
| C | -0.50749 | 2.05809  | -0.01790 |
| N | -0.12764 | 0.72676  | -0.01708 |
| O | -1.66564 | 2.42305  | -0.01983 |
| O | 1.50293  | -0.88366 | -0.01502 |
| H | 1.91275  | 1.11416  | -0.01479 |
| H | 0.34975  | 2.74994  | -0.01658 |
| H | -0.86459 | 0.02518  | -0.01815 |

Supplementary Material (ESI) for PCCP  
This journal is © the Owner Societies 2011

|                                                                                                  |          |          |          |
|--------------------------------------------------------------------------------------------------|----------|----------|----------|
| H                                                                                                | -0.55100 | -3.50750 | 0.08914  |
| H                                                                                                | -0.12146 | -2.90048 | 0.06619  |
| <b>N13 val+07_110 DE(MP2)=-0.337363 E(QCISD(T))=-283.630256 E(ZPE)=0.072935 E(HLC)=-0.150615</b> |          |          |          |
| C                                                                                                | 1.90623  | -1.09920 | 1.21418  |
| C                                                                                                | -0.81566 | 0.91130  | -0.19867 |
| N                                                                                                | -0.84191 | -0.46911 | -0.66580 |
| O                                                                                                | 2.06847  | -2.19355 | 1.47430  |
| O                                                                                                | 0.50636  | 1.41437  | -0.21148 |
| H                                                                                                | -1.39314 | 1.61297  | -0.81796 |
| H                                                                                                | -1.24607 | 0.91994  | 0.81446  |
| H                                                                                                | -1.74215 | -0.89470 | -0.44935 |
| H                                                                                                | -0.74020 | -0.49602 | -1.67964 |
| H                                                                                                | 1.04155  | 0.76511  | 0.27986  |
| <b>N14 val+03_12 DE(MP2)=-0.342120 E(QCISD(T))=-283.636076 E(ZPE)=0.075099 E(HLC)=-0.150615</b>  |          |          |          |
| C                                                                                                | 0.43177  | -0.34981 | 0.12132  |
| C                                                                                                | -1.88180 | -0.63519 | -0.04278 |
| N                                                                                                | -0.52438 | -1.16856 | -0.02610 |
| O                                                                                                | 0.39824  | 1.00093  | 0.27346  |
| O                                                                                                | 1.70519  | -0.79361 | 0.14283  |
| H                                                                                                | -2.05467 | 0.05882  | -0.88008 |
| H                                                                                                | -2.14701 | -0.11300 | 0.89009  |
| H                                                                                                | -2.58833 | -1.46146 | -0.15945 |
| H                                                                                                | -0.52156 | 1.31533  | 0.25766  |
| H                                                                                                | 2.29676  | -0.03115 | 0.26294  |
| <b>N15 val+03_10 DE(MP2)=-0.345859 E(QCISD(T))=-283.631194 E(ZPE)=0.075677 E(HLC)=-0.150615</b>  |          |          |          |
| C                                                                                                | 0.16008  | 0.12114  | -0.31727 |
| C                                                                                                | -1.33528 | -0.01587 | -0.10275 |
| N                                                                                                | 0.67214  | 1.28392  | -0.33041 |
| O                                                                                                | 0.87616  | -1.01366 | -0.48614 |
| O                                                                                                | -1.94299 | 1.24373  | 0.06675  |
| H                                                                                                | -1.76660 | -0.54392 | -0.96788 |
| H                                                                                                | -1.50693 | -0.65299 | 0.77916  |
| H                                                                                                | 1.68272  | 1.25772  | -0.48231 |
| H                                                                                                | 0.29976  | -1.79677 | -0.43992 |
| H                                                                                                | -1.20527 | 1.88429  | -0.01092 |
| <b>N16 val+07_25 DE(MP2)=-0.332316 E(QCISD(T))=-283.619113 E(ZPE)=0.066727 E(HLC)=-0.150615</b>  |          |          |          |
| C                                                                                                | 2.43079  | 0.06775  | -2.04078 |
| C                                                                                                | -0.85857 | 1.66642  | 0.64618  |
| N                                                                                                | 0.84873  | -1.79297 | 0.11199  |
| O                                                                                                | 1.64938  | 0.89180  | -1.95467 |
| O                                                                                                | -1.00813 | 0.60472  | 1.21482  |
| H                                                                                                | -1.44087 | 2.56308  | 0.92822  |
| H                                                                                                | -0.13700 | 1.79417  | -0.18015 |
| H                                                                                                | 0.32751  | -2.17562 | -0.67717 |
| H                                                                                                | 0.26555  | -1.03623 | 0.47713  |
| H                                                                                                | 0.82092  | -2.52372 | 0.82411  |
| <b>N17 val+03_28 DE(MP2)=-0.339522 E(QCISD(T))=-283.636967 E(ZPE)=0.076409 E(HLC)=-0.150615</b>  |          |          |          |
| C                                                                                                | 0.52542  | -0.27685 | -0.33822 |
| C                                                                                                | -1.82801 | -0.55513 | -0.32931 |
| N                                                                                                | 0.58688  | 0.80967  | 0.32444  |
| O                                                                                                | -0.52965 | -1.02285 | -0.71563 |
| O                                                                                                | 1.63461  | -0.88942 | -0.79967 |
| H                                                                                                | -2.03253 | 0.42910  | -0.76313 |
| H                                                                                                | -2.53239 | -1.28553 | -0.72620 |
| H                                                                                                | -1.91748 | -0.51028 | 0.76098  |
| H                                                                                                | -0.33074 | 1.15021  | 0.60411  |
| H                                                                                                | 2.38669  | -0.33922 | -0.51888 |
| <b>N18 val+07_107 DE(MP2)=-0.339459 E(QCISD(T))=-283.618535 E(ZPE)=0.067701 E(HLC)=-0.150615</b> |          |          |          |
| C                                                                                                | 1.16640  | -1.67315 | -2.28420 |
| C                                                                                                | -0.18441 | 1.17323  | 1.61414  |
| N                                                                                                | 0.13964  | 0.19041  | 0.87424  |
| O                                                                                                | 1.77741  | -2.36826 | -1.62063 |
| O                                                                                                | -1.44310 | -1.35865 | -0.96665 |
| H                                                                                                | -1.21849 | 1.52296  | 1.60748  |
| H                                                                                                | 0.50973  | 1.70623  | 2.27106  |
| H                                                                                                | -0.93493 | -0.81805 | -0.31558 |
| H                                                                                                | 1.13344  | -0.03939 | 0.97042  |
| H                                                                                                | -1.36770 | -0.84443 | -1.78438 |
| <b>N19 val+07_39 DE(MP2)=-0.327443 E(QCISD(T))=-283.612408 E(ZPE)=0.056253 E(HLC)=-0.150615</b>  |          |          |          |
| C                                                                                                | -1.31172 | 1.25486  | 1.25258  |



|   |          |          |          |
|---|----------|----------|----------|
| C | 0.25222  | 2.70210  | -1.53441 |
| N | -0.36963 | -1.42059 | -0.41400 |
| O | -1.49292 | 0.88772  | 2.31442  |
| O | 0.38857  | 1.66161  | -1.97535 |
| H | -0.10666 | -0.61804 | -0.98492 |
| H | 1.84864  | -1.72571 | 2.22938  |
| H | -1.32442 | -1.64780 | -0.69234 |
| H | 0.20203  | -2.19420 | -0.75313 |
| H | 1.31779  | -1.61695 | 1.71818  |

## Coordinates and thermochemical properties for the all $C_2H_5NO_2$ gas phase structures

| Filename   | dfH    | S(scaled) | S(UNscaled) | G           | Cv(UNscaled) |
|------------|--------|-----------|-------------|-------------|--------------|
| Units      | kJ/mol | J/molK    | J/molK      | Hartree     | J/molK       |
| val+03_10: | -325.0 | 310.3     | 308.0       | -284.069779 | 78.8         |
| val+03_11: | -217.2 | 323.5     | 321.0       | -284.030221 | 83.5         |
| val+03_12: | -323.7 | 322.6     | 320.3       | -284.070714 | 81.1         |
| val+03_13: | 95.8   | 313.2     | 310.7       | -283.909839 | 83.8         |
| val+03_14: | 7.4    | 319.2     | 316.8       | -283.944214 | 80.9         |
| val+03_15: | -12.3  | 323.5     | 320.9       | -283.952188 | 88.2         |
| val+03_16: | -85.7  | 319.5     | 317.1       | -283.979691 | 83.1         |
| val+03_17: | -35.7  | 320.7     | 318.1       | -283.960775 | 87.4         |
| val+03_18: | -120.3 | 317.4     | 314.9       | -283.992646 | 83.8         |
| val+03_19: | -4.2   | 320.3     | 318.1       | -283.948758 | 78.7         |
| val+03_1:  | -105.8 | 314.8     | 312.4       | -283.986808 | 83.3         |
| val+03_20: | -146.4 | 313.8     | 311.6       | -284.002170 | 77.2         |
| val+03_21: | -11.1  | 326.4     | 324.1       | -283.952074 | 80.8         |
| val+03_22: | -271.9 | 317.6     | 315.5       | -284.050393 | 75.5         |
| val+03_23: | 59.5   | 330.6     | 328.1       | -283.925646 | 83.7         |
| val+03_24: | -28.0  | 325.3     | 322.9       | -283.958398 | 82.8         |
| val+03_25: | -128.3 | 329.6     | 327.2       | -283.997082 | 81.4         |
| val+03_26: | -168.9 | 321.0     | 318.9       | -284.011551 | 76.7         |
| val+03_27: | -79.6  | 320.2     | 317.8       | -283.977436 | 83.3         |
| val+03_28: | -324.9 | 306.9     | 304.8       | -284.069362 | 75.7         |
| val+03_29: | 123.4  | 324.9     | 322.4       | -283.900675 | 84.5         |
| val+03_2:  | -11.5  | 306.6     | 304.2       | -283.949958 | 82.5         |
| val+03_30: | 102.6  | 318.4     | 316.1       | -283.907857 | 79.9         |
| val+03_31: | -35.7  | 318.6     | 316.5       | -283.960561 | 76.9         |
| val+03_32: | -148.2 | 319.6     | 317.4       | -284.003532 | 78.5         |
| val+03_33: | -346.6 | 316.8     | 314.6       | -284.078773 | 77.0         |
| val+03_34: | -296.7 | 320.8     | 318.3       | -284.060210 | 83.3         |
| val+03_35: | -228.5 | 314.7     | 312.4       | -284.033551 | 81.2         |
| val+03_36: | -419.8 | 316.7     | 314.5       | -284.106613 | 77.7         |
| val+03_37: | -383.7 | 324.6     | 322.2       | -284.093783 | 81.8         |
| val+03_38: | -366.1 | 316.2     | 314.0       | -284.086131 | 78.6         |
| val+03_39: | -204.3 | 320.2     | 317.9       | -284.024962 | 78.1         |
| val+03_3:  | -140.0 | 312.3     | 309.8       | -283.999544 | 84.4         |
| val+03_40: | -135.6 | 309.5     | 307.3       | -283.997566 | 78.4         |
| val+03_41: | -97.0  | 322.9     | 320.7       | -283.984382 | 77.9         |
| val+03_42: | -130.7 | 313.0     | 310.8       | -283.996111 | 77.2         |
| val+03_43: | -344.7 | 311.0     | 308.9       | -284.077380 | 75.5         |
| val+03_44: | -165.4 | 316.6     | 314.4       | -284.009741 | 77.5         |
| val+03_45: | -190.1 | 314.6     | 312.5       | -284.018917 | 75.6         |
| val+03_46: | -223.5 | 316.6     | 314.3       | -284.031838 | 80.1         |
| val+03_47: | -406.2 | 315.3     | 313.1       | -284.101288 | 79.3         |
| val+03_48: | -94.9  | 320.0     | 317.8       | -283.983274 | 77.8         |
| val+03_49: | -61.6  | 315.7     | 313.5       | -283.970099 | 76.1         |
| val+03_4:  | -279.9 | 310.1     | 307.6       | -284.052611 | 85.1         |
| val+03_50: | 44.4   | 308.3     | 306.1       | -283.928878 | 75.9         |
| val+03_51: | -64.3  | 301.0     | 298.9       | -283.969446 | 73.1         |
| val+03_52: | -80.3  | 309.1     | 307.0       | -283.976445 | 73.7         |
| val+03_53: | -82.9  | 297.1     | 295.2       | -283.976099 | 68.9         |
| val+03_54: | -89.1  | 303.8     | 302.0       | -283.979199 | 69.0         |
| val+03_55: | -230.5 | 295.0     | 293.2       | -284.032063 | 67.3         |
| val+03_56: | -241.1 | 302.7     | 300.5       | -284.036989 | 77.8         |
| val+03_57: | -11.9  | 304.5     | 302.3       | -283.949873 | 78.1         |
| val+03_58: | -102.9 | 306.2     | 304.1       | -283.984741 | 76.8         |
| val+03_59: | 166.7  | 313.5     | 311.3       | -283.882887 | 77.7         |
| val+03_5:  | -278.4 | 317.2     | 314.6       | -284.052854 | 87.3         |
| val+03_60: | 23.9   | 299.0     | 297.1       | -283.935628 | 69.8         |
| val+03_61: | -57.5  | 296.1     | 294.2       | -283.966285 | 68.5         |
| val+03_62: | -72.0  | 305.4     | 303.4       | -283.972891 | 72.4         |
| val+03_63: | -247.2 | 299.4     | 297.1       | -284.038911 | 78.5         |
| val+03_64: | -136.7 | 302.9     | 300.7       | -283.997216 | 77.7         |

Supplementary Material (ESI) for PCCP  
This journal is © the Owner Societies 2011

|             |        |       |       |             |       |
|-------------|--------|-------|-------|-------------|-------|
| val+03_65:  | -209.4 | 302.5 | 300.3 | -284.024884 | 77.3  |
| val+03_66:  | -78.2  | 314.0 | 311.6 | -283.976231 | 81.3  |
| val+03_67:  | -236.1 | 295.8 | 293.6 | -284.034293 | 76.2  |
| val+03_68:  | 131.4  | 298.8 | 296.9 | -283.894674 | 70.5  |
| val+03_69:  | 41.3   | 303.1 | 301.2 | -283.929457 | 69.9  |
| val+03_6:   | -292.5 | 310.7 | 308.5 | -284.057450 | 78.8  |
| val+03_70:  | -21.1  | 307.2 | 305.2 | -283.953708 | 74.4  |
| val+03_71:  | -68.6  | 310.4 | 308.4 | -283.972152 | 72.0  |
| val+03_72:  | 5.1    | 300.0 | 298.0 | -283.942887 | 72.3  |
| val+03_73:  | -8.9   | 308.1 | 306.0 | -283.949138 | 74.3  |
| val+03_74:  | -47.6  | 311.3 | 309.3 | -283.964252 | 73.8  |
| val+03_75:  | -237.7 | 293.7 | 291.9 | -284.034661 | 67.9  |
| val+03_77:  | -9.6   | 296.4 | 294.8 | -283.948092 | 62.4  |
| val+03_78:  | -36.3  | 293.4 | 291.8 | -283.957907 | 62.5  |
| val+03_79:  | -112.3 | 288.8 | 287.3 | -283.986335 | 61.1  |
| val+03_7:   | -157.9 | 318.7 | 316.3 | -284.007116 | 80.2  |
| val+03_80:  | 213.2  | 308.0 | 305.9 | -283.864531 | 75.1  |
| val+03_81:  | 165.5  | 296.9 | 295.1 | -283.881445 | 69.9  |
| val+03_82:  | 42.9   | 307.9 | 305.9 | -283.929393 | 74.2  |
| val+03_83:  | 60.5   | 298.4 | 296.5 | -283.921620 | 69.2  |
| val+03_84:  | -78.9  | 303.8 | 301.5 | -283.975316 | 79.4  |
| val+03_8:   | -279.2 | 315.1 | 312.9 | -284.052895 | 79.0  |
| val+03_9:   | -278.8 | 305.8 | 303.6 | -284.051674 | 78.0  |
| val+05_100: | -183.3 | 318.9 | 316.6 | -284.016804 | 78.1  |
| val+05_103: | -187.4 | 305.3 | 303.2 | -284.016834 | 76.1  |
| val+05_104: | -45.2  | 318.5 | 316.2 | -283.964171 | 80.0  |
| val+05_105: | -112.1 | 312.7 | 310.3 | -283.988991 | 80.8  |
| val+05_106: | -298.8 | 379.2 | 376.3 | -284.067622 | 95.1  |
| val+05_107: | -163.2 | 370.1 | 367.2 | -284.014962 | 93.4  |
| val+05_108: | -122.7 | 303.5 | 301.5 | -283.991975 | 74.2  |
| val+05_109: | -111.3 | 317.5 | 315.4 | -283.989228 | 75.7  |
| val+05_10:  | -217.9 | 339.0 | 336.2 | -284.032258 | 92.4  |
| val+05_110: | -243.8 | 356.4 | 353.4 | -284.044119 | 99.6  |
| val+05_112: | 34.4   | 302.2 | 300.3 | -283.931997 | 68.5  |
| val+05_113: | -67.2  | 406.2 | 403.3 | -283.982510 | 94.8  |
| val+05_114: | 59.7   | 296.0 | 294.2 | -283.921655 | 66.6  |
| val+05_115: | 25.8   | 292.4 | 290.7 | -283.934157 | 64.8  |
| val+05_116: | -46.3  | 384.6 | 381.8 | -283.972102 | 93.7  |
| val+05_117: | -379.4 | 312.1 | 309.7 | -284.090725 | 80.8  |
| val+05_118: | -386.7 | 306.9 | 304.9 | -284.092923 | 74.2  |
| val+05_11:  | -199.8 | 346.6 | 343.7 | -284.026211 | 92.9  |
| val+05_121: | -273.3 | 391.3 | 388.2 | -284.059280 | 98.4  |
| val+05_122: | -310.6 | 373.8 | 371.1 | -284.071527 | 91.9  |
| val+05_123: | -197.7 | 370.9 | 367.5 | -284.028206 | 107.2 |
| val+05_124: | 80.6   | 325.9 | 323.6 | -283.917102 | 80.2  |
| val+05_125: | -333.3 | 335.7 | 333.3 | -284.075845 | 83.0  |
| val+05_127: | -67.0  | 316.7 | 314.5 | -283.972260 | 76.6  |
| val+05_128: | -340.7 | 375.5 | 372.7 | -284.083170 | 90.9  |
| val+05_129: | 5.4    | 315.0 | 312.8 | -283.944485 | 77.8  |
| val+05_12:  | -380.9 | 332.7 | 330.3 | -284.093632 | 83.1  |
| val+05_131: | -278.5 | 447.1 | 443.4 | -284.067625 | 115.6 |
| val+05_132: | -275.4 | 473.1 | 469.3 | -284.069382 | 117.5 |
| val+05_133: | -72.6  | 307.7 | 305.6 | -283.973378 | 75.8  |
| val+05_134: | -228.5 | 314.5 | 312.2 | -284.033531 | 81.2  |
| val+05_135: | -100.0 | 317.1 | 315.1 | -283.984847 | 72.6  |
| val+05_136: | -53.2  | 314.5 | 312.6 | -283.966764 | 72.4  |
| val+05_137: | 137.4  | 312.2 | 309.7 | -283.893895 | 84.6  |
| val+05_139: | 96.0   | 362.2 | 358.9 | -283.915332 | 103.3 |
| val+05_13:  | -325.0 | 310.3 | 308.1 | -284.069787 | 78.8  |
| val+05_141: | 0.7    | 327.5 | 324.9 | -283.947689 | 85.9  |
| val+05_142: | -105.5 | 377.7 | 374.4 | -283.993863 | 105.3 |
| val+05_143: | 112.2  | 355.7 | 352.5 | -283.908449 | 103.8 |
| val+05_144: | 0.7    | 333.2 | 330.6 | -283.948327 | 87.5  |
| val+05_145: | -157.0 | 319.7 | 317.4 | -284.006891 | 78.7  |
| val+05_146: | 113.8  | 321.0 | 318.4 | -283.903876 | 87.8  |
| val+05_147: | -67.2  | 312.2 | 309.7 | -283.971800 | 83.2  |
| val+05_148: | -131.4 | 314.6 | 312.3 | -283.996562 | 80.7  |
| val+05_149: | 6.2    | 317.8 | 315.4 | -283.944517 | 82.3  |
| val+05_14:  | -253.5 | 353.5 | 350.6 | -284.047451 | 94.8  |
| val+05_150: | -160.2 | 319.5 | 317.0 | -284.008057 | 84.1  |
| val+05_151: | 205.9  | 343.5 | 340.8 | -283.871365 | 89.8  |
| val+05_152: | -13.9  | 327.2 | 324.5 | -283.953216 | 89.3  |
| val+05_153: | 17.5   | 318.7 | 316.2 | -283.940286 | 84.6  |
| val+05_154: | -17.6  | 317.3 | 315.0 | -283.953515 | 80.0  |
| val+05_155: | 103.5  | 318.6 | 316.2 | -283.907542 | 82.5  |
| val+05_156: | -163.7 | 306.8 | 304.5 | -284.007978 | 78.6  |
| val+05_157: | 245.7  | 328.9 | 326.2 | -283.854533 | 88.5  |

Supplementary Material (ESI) for PCCP  
This journal is © the Owner Societies 2011

|             |        |       |       |             |       |
|-------------|--------|-------|-------|-------------|-------|
| val+05_158: | 160.0  | 317.7 | 315.3 | -283.885894 | 83.4  |
| val+05_159: | 145.7  | 320.2 | 317.9 | -283.891631 | 80.4  |
| val+05_15:  | -228.5 | 314.3 | 311.9 | -284.033479 | 81.1  |
| val+05_160: | 27.3   | 324.2 | 321.8 | -283.937181 | 83.7  |
| val+05_161: | -6.5   | 331.9 | 329.3 | -283.950948 | 87.5  |
| val+05_162: | 257.8  | 329.1 | 326.6 | -283.849973 | 85.9  |
| val+05_17:  | 237.4  | 299.9 | 297.7 | -283.854420 | 78.2  |
| val+05_18:  | 234.2  | 310.5 | 308.1 | -283.856830 | 81.7  |
| val+05_19:  | 131.9  | 297.2 | 295.3 | -283.894285 | 72.0  |
| val+05_1:   | 233.8  | 390.9 | 387.6 | -283.866130 | 105.6 |
| val+05_20:  | -252.2 | 387.4 | 384.2 | -284.050838 | 103.6 |
| val+05_21:  | 245.9  | 301.0 | 299.0 | -283.851296 | 74.4  |
| val+05_23:  | -210.5 | 341.9 | 339.4 | -284.029779 | 86.4  |
| val+05_24:  | 164.7  | 309.8 | 307.7 | -283.883240 | 76.5  |
| val+05_25:  | -241.8 | 400.7 | 397.9 | -284.048390 | 92.2  |
| val+05_26:  | -301.8 | 367.1 | 364.4 | -284.067424 | 88.2  |
| val+05_27:  | -114.1 | 353.6 | 350.9 | -283.994396 | 90.5  |
| val+05_28:  | -11.3  | 312.0 | 309.5 | -283.950502 | 84.5  |
| val+05_29:  | 47.0   | 304.3 | 302.2 | -283.927426 | 75.4  |
| val+05_2:   | -51.1  | 321.3 | 318.9 | -283.966734 | 81.8  |
| val+05_30:  | 157.2  | 307.7 | 305.5 | -283.885829 | 77.0  |
| val+05_31:  | 33.5   | 362.6 | 359.5 | -283.939188 | 99.4  |
| val+05_32:  | 214.7  | 326.1 | 323.5 | -283.866045 | 87.6  |
| val+05_33:  | 342.3  | 297.4 | 295.3 | -283.814185 | 74.8  |
| val+05_34:  | -32.7  | 352.4 | 349.4 | -283.963232 | 97.4  |
| val+05_35:  | -77.4  | 321.0 | 318.6 | -283.976717 | 82.9  |
| val+05_36:  | 156.7  | 312.0 | 309.9 | -283.886538 | 75.0  |
| val+05_37:  | -171.1 | 345.9 | 343.1 | -284.015217 | 91.9  |
| val+05_38:  | -107.5 | 321.8 | 319.3 | -283.988259 | 84.8  |
| val+05_39:  | 12.6   | 313.8 | 311.3 | -283.941598 | 83.9  |
| val+05_3:   | 157.2  | 333.7 | 330.9 | -283.888786 | 92.7  |
| val+05_40:  | 278.0  | 318.3 | 315.7 | -283.841046 | 87.1  |
| val+05_41:  | -137.7 | 310.3 | 307.8 | -283.998444 | 83.5  |
| val+05_42:  | 110.6  | 303.6 | 301.3 | -283.903128 | 80.9  |
| val+05_43:  | 260.0  | 300.7 | 298.4 | -283.845890 | 81.3  |
| val+05_44:  | -39.7  | 308.2 | 305.7 | -283.960885 | 84.1  |
| val+05_45:  | -275.7 | 313.4 | 310.8 | -284.051388 | 87.0  |
| val+05_46:  | -216.3 | 306.1 | 303.9 | -284.027938 | 78.5  |
| val+05_47:  | -78.2  | 314.0 | 311.6 | -283.976230 | 81.3  |
| val+05_49:  | -10.6  | 337.8 | 335.0 | -283.953185 | 94.0  |
| val+05_4:   | -160.5 | 333.5 | 330.6 | -284.009758 | 92.6  |
| val+05_50:  | -187.7 | 388.7 | 385.5 | -284.026411 | 104.9 |
| val+05_51:  | -64.3  | 313.3 | 310.7 | -283.970854 | 85.5  |
| val+05_52:  | 190.1  | 366.3 | 363.4 | -283.879953 | 93.4  |
| val+05_53:  | -4.2   | 315.0 | 312.7 | -283.948145 | 78.4  |
| val+05_54:  | -259.7 | 363.0 | 360.0 | -284.050923 | 96.3  |
| val+05_55:  | -32.5  | 312.0 | 309.5 | -283.958595 | 84.4  |
| val+05_56:  | -131.7 | 318.9 | 316.6 | -283.997134 | 80.3  |
| val+05_57:  | 128.5  | 368.7 | 365.3 | -283.903715 | 106.0 |
| val+05_58:  | -214.6 | 321.7 | 319.3 | -284.029055 | 82.2  |
| val+05_59:  | -97.3  | 354.1 | 351.2 | -283.988050 | 95.0  |
| val+05_60:  | 217.7  | 326.2 | 323.8 | -283.864910 | 81.4  |
| val+05_61:  | -75.6  | 308.2 | 306.1 | -283.974552 | 76.0  |
| val+05_62:  | 317.5  | 312.4 | 310.2 | -283.825317 | 77.2  |
| val+05_63:  | -42.4  | 314.3 | 311.9 | -283.962614 | 81.8  |
| val+05_65:  | -406.2 | 314.9 | 312.6 | -284.101236 | 79.3  |
| val+05_69:  | -73.5  | 329.6 | 327.1 | -283.976179 | 85.1  |
| val+05_6:   | -276.7 | 312.0 | 309.5 | -284.051587 | 83.9  |
| val+05_70:  | 305.2  | 313.8 | 311.5 | -283.830166 | 79.7  |
| val+05_71:  | 208.3  | 313.4 | 311.1 | -283.867020 | 80.7  |
| val+05_72:  | -29.0  | 305.1 | 302.9 | -283.956452 | 75.6  |
| val+05_73:  | -322.9 | 348.6 | 345.9 | -284.073348 | 90.3  |
| val+05_74:  | -322.9 | 348.6 | 345.9 | -284.073350 | 90.3  |
| val+05_76:  | -51.3  | 313.7 | 311.7 | -283.965922 | 73.1  |
| val+05_77:  | -128.2 | 322.2 | 320.0 | -283.996183 | 78.7  |
| val+05_78:  | -380.5 | 314.3 | 312.1 | -284.091374 | 77.0  |
| val+05_79:  | -344.7 | 310.9 | 308.8 | -284.077369 | 75.4  |
| val+05_7:   | -299.7 | 307.2 | 304.8 | -284.059817 | 81.5  |
| val+05_80:  | -259.8 | 362.8 | 359.9 | -284.050910 | 96.3  |
| val+05_81:  | -273.3 | 371.7 | 368.7 | -284.057060 | 98.4  |
| val+05_82:  | -6.7   | 342.2 | 339.4 | -283.952190 | 92.6  |
| val+05_83:  | -21.1  | 307.1 | 305.0 | -283.953686 | 74.4  |
| val+05_84:  | 256.8  | 333.2 | 330.9 | -283.850814 | 80.5  |
| val+05_85:  | -22.0  | 354.2 | 351.7 | -283.959392 | 85.2  |
| val+05_86:  | -10.3  | 308.1 | 306.1 | -283.949685 | 74.3  |
| val+05_88:  | -78.9  | 304.0 | 301.7 | -283.975342 | 79.4  |
| val+05_8:   | -84.0  | 381.1 | 378.0 | -283.986056 | 100.3 |

Supplementary Material (ESI) for PCCP  
This journal is © the Owner Societies 2011

|             |        |       |       |             |       |
|-------------|--------|-------|-------|-------------|-------|
| val+05_90:  | 19.3   | 301.8 | 299.6 | -283.937688 | 75.7  |
| val+05_91:  | 101.3  | 303.2 | 301.0 | -283.906631 | 77.6  |
| val+05_92:  | -211.1 | 346.0 | 343.1 | -284.030455 | 93.9  |
| val+05_93:  | -205.1 | 377.9 | 374.6 | -284.031817 | 104.6 |
| val+05_94:  | 52.6   | 312.9 | 310.5 | -283.926273 | 81.6  |
| val+05_95:  | -280.3 | 356.2 | 353.2 | -284.057997 | 95.6  |
| val+05_96:  | -115.6 | 317.4 | 315.0 | -283.990833 | 83.1  |
| val+05_97:  | -48.1  | 325.9 | 323.3 | -283.966101 | 86.6  |
| val+05_98:  | -317.3 | 365.8 | 362.6 | -284.073179 | 102.4 |
| val+05_99:  | -124.3 | 311.9 | 309.5 | -283.993534 | 82.4  |
| val+05_9:   | -214.6 | 320.5 | 318.1 | -284.028899 | 82.1  |
| val+07_100: | -205.1 | 386.8 | 383.5 | -284.032823 | 104.6 |
| val+07_101: | -31.7  | 307.6 | 305.3 | -283.957758 | 78.7  |
| val+07_102: | -11.1  | 307.0 | 304.9 | -283.949856 | 76.4  |
| val+07_103: | 263.4  | 303.9 | 301.5 | -283.844949 | 83.6  |
| val+07_104: | 19.3   | 301.7 | 299.5 | -283.937675 | 75.7  |
| val+07_105: | 101.2  | 303.3 | 301.1 | -283.906657 | 77.6  |
| val+07_106: | 53.1   | 311.4 | 309.1 | -283.925904 | 81.0  |
| val+07_107: | -287.0 | 426.6 | 423.1 | -284.068544 | 110.7 |
| val+07_109: | -11.5  | 313.7 | 311.5 | -283.950787 | 77.4  |
| val+07_10:  | -51.1  | 321.3 | 319.0 | -283.966736 | 81.8  |
| val+07_110: | -57.0  | 365.2 | 362.1 | -283.973938 | 99.1  |
| val+07_111: | -103.2 | 364.4 | 361.3 | -283.991446 | 99.5  |
| val+07_112: | -425.9 | 368.7 | 366.0 | -284.114840 | 88.4  |
| val+07_113: | -51.2  | 321.6 | 319.2 | -283.966794 | 81.9  |
| val+07_114: | -322.9 | 348.7 | 346.0 | -284.073370 | 90.3  |
| val+07_115: | -66.7  | 341.0 | 337.9 | -283.974900 | 99.6  |
| val+07_117: | -59.5  | 341.1 | 338.3 | -283.972169 | 94.1  |
| val+07_119: | -197.7 | 371.3 | 367.9 | -284.028248 | 107.2 |
| val+07_11:  | -312.1 | 365.7 | 362.9 | -284.071154 | 91.7  |
| val+07_120: | -99.0  | 329.8 | 327.5 | -283.985937 | 78.3  |
| val+07_121: | -72.6  | 307.7 | 305.6 | -283.973357 | 75.7  |
| val+07_122: | 150.9  | 348.4 | 345.8 | -283.892869 | 88.9  |
| val+07_124: | -142.8 | 321.9 | 319.6 | -284.001718 | 80.7  |
| val+07_125: | -210.5 | 341.4 | 338.8 | -284.029701 | 86.3  |
| val+07_128: | -148.1 | 317.3 | 315.1 | -284.003224 | 78.2  |
| val+07_129: | -67.8  | 303.5 | 301.5 | -283.971053 | 73.9  |
| val+07_12:  | -312.1 | 365.7 | 363.0 | -284.071162 | 91.6  |
| val+07_131: | -48.1  | 325.7 | 323.1 | -283.966069 | 86.6  |
| val+07_132: | -259.8 | 386.7 | 384.0 | -284.053655 | 90.6  |
| val+07_134: | -244.0 | 315.5 | 313.2 | -284.039521 | 78.6  |
| val+07_135: | -111.3 | 317.5 | 315.4 | -283.989212 | 75.6  |
| val+07_136: | 257.9  | 316.9 | 314.5 | -283.848541 | 83.7  |
| val+07_137: | -22.3  | 314.6 | 312.4 | -283.954984 | 77.7  |
| val+07_138: | 237.4  | 299.9 | 297.7 | -283.854421 | 78.2  |
| val+07_139: | 159.0  | 301.3 | 299.3 | -283.884431 | 73.9  |
| val+07_13:  | -139.7 | 367.4 | 364.5 | -284.005692 | 93.2  |
| val+07_140: | -425.8 | 368.1 | 365.5 | -284.114766 | 88.4  |
| val+07_141: | -175.4 | 353.2 | 350.7 | -284.017684 | 84.4  |
| val+07_142: | -86.4  | 318.3 | 316.1 | -283.979820 | 79.9  |
| val+07_143: | 10.2   | 316.1 | 313.8 | -283.942798 | 80.5  |
| val+07_144: | 309.0  | 309.9 | 307.7 | -283.828273 | 76.9  |
| val+07_145: | -12.8  | 352.5 | 349.2 | -283.955688 | 104.2 |
| val+07_146: | -124.5 | 386.9 | 383.4 | -284.002119 | 110.1 |
| val+07_148: | -236.2 | 314.3 | 311.9 | -284.036439 | 80.9  |
| val+07_14:  | -166.7 | 366.8 | 364.0 | -284.015924 | 92.5  |
| val+07_150: | 101.2  | 304.5 | 302.3 | -283.906796 | 77.7  |
| val+07_151: | 52.6   | 312.9 | 310.6 | -283.926284 | 81.6  |
| val+07_152: | -310.6 | 373.9 | 371.1 | -284.071543 | 91.9  |
| val+07_153: | -48.2  | 325.8 | 323.3 | -283.966121 | 86.6  |
| val+07_154: | -67.2  | 404.6 | 401.7 | -283.982334 | 94.8  |
| val+07_155: | -72.6  | 308.0 | 305.9 | -283.973402 | 75.8  |
| val+07_158: | -46.3  | 384.4 | 381.5 | -283.972055 | 93.7  |
| val+07_15:  | -311.1 | 367.1 | 364.6 | -284.070933 | 85.6  |
| val+07_16:  | 343.9  | 347.4 | 344.5 | -283.819250 | 94.6  |
| val+07_17:  | -161.9 | 307.7 | 305.3 | -284.007361 | 80.9  |
| val+07_18:  | -312.0 | 365.0 | 362.3 | -284.071062 | 91.6  |
| val+07_19:  | -83.1  | 368.7 | 365.9 | -283.984293 | 93.1  |
| val+07_1:   | 201.6  | 308.1 | 305.8 | -283.868974 | 81.0  |
| val+07_21:  | -359.6 | 308.8 | 306.7 | -284.082821 | 74.4  |
| val+07_22:  | -118.1 | 353.6 | 350.7 | -283.995917 | 95.3  |
| val+07_23:  | 103.5  | 318.4 | 316.0 | -283.907527 | 82.5  |
| val+07_24:  | -279.3 | 420.0 | 416.4 | -284.064850 | 113.5 |
| val+07_25:  | -278.2 | 446.6 | 442.9 | -284.067439 | 115.3 |
| val+07_26:  | -78.9  | 303.8 | 301.5 | -283.975308 | 79.4  |
| val+07_27:  | -14.0  | 328.0 | 325.3 | -283.953334 | 89.4  |
| val+07_28:  | -133.9 | 374.0 | 371.2 | -284.004232 | 92.8  |

Supplementary Material (ESI) for PCCP  
This journal is © the Owner Societies 2011

|            |        |       |       |             |       |
|------------|--------|-------|-------|-------------|-------|
| val+07_29: | 242.0  | 313.0 | 310.6 | -283.854133 | 82.7  |
| val+07_2:  | -159.8 | 335.9 | 333.1 | -284.009805 | 93.7  |
| val+07_31: | 181.9  | 303.8 | 301.6 | -283.875982 | 77.2  |
| val+07_32: | -22.1  | 355.4 | 352.9 | -283.959537 | 85.3  |
| val+07_36: | 136.8  | 366.6 | 363.1 | -283.900289 | 109.7 |
| val+07_38: | 363.5  | 352.7 | 349.4 | -283.812389 | 104.2 |
| val+07_39: | -221.6 | 366.2 | 363.2 | -284.036747 | 98.7  |
| val+07_3:  | -43.7  | 314.8 | 312.2 | -283.963146 | 86.9  |
| val+07_40: | -163.2 | 369.2 | 366.4 | -284.014879 | 93.4  |
| val+07_41: | -103.2 | 364.4 | 361.4 | -283.991459 | 99.5  |
| val+07_42: | 156.5  | 367.1 | 364.3 | -283.892854 | 92.4  |
| val+07_44: | -51.1  | 321.5 | 319.1 | -283.966759 | 81.8  |
| val+07_45: | -214.9 | 388.5 | 385.0 | -284.036733 | 109.5 |
| val+07_46: | -110.6 | 305.4 | 303.2 | -283.987572 | 78.1  |
| val+07_47: | -83.0  | 323.8 | 321.3 | -283.979161 | 84.5  |
| val+07_48: | -366.1 | 315.8 | 313.6 | -284.086065 | 78.5  |
| val+07_49: | -148.9 | 432.9 | 428.8 | -284.016647 | 122.9 |
| val+07_4:  | -95.8  | 304.4 | 302.2 | -283.981823 | 79.1  |
| val+07_51: | -183.3 | 318.5 | 316.3 | -284.016759 | 78.1  |
| val+07_52: | 401.4  | 322.6 | 320.1 | -283.794529 | 85.4  |
| val+07_53: | -32.7  | 352.9 | 349.9 | -283.963294 | 97.5  |
| val+07_54: | -70.2  | 315.0 | 312.6 | -283.973267 | 83.6  |
| val+07_55: | 231.6  | 329.7 | 326.9 | -283.859996 | 90.9  |
| val+07_56: | 79.7   | 311.4 | 309.1 | -283.915760 | 80.6  |
| val+07_57: | 310.2  | 372.3 | 369.1 | -283.834893 | 101.5 |
| val+07_58: | -51.1  | 321.2 | 318.8 | -283.966709 | 81.8  |
| val+07_60: | -227.2 | 305.1 | 302.8 | -284.031947 | 78.4  |
| val+07_61: | 110.3  | 313.9 | 311.5 | -283.904398 | 83.4  |
| val+07_62: | 61.5   | 312.7 | 310.4 | -283.922877 | 80.8  |
| val+07_63: | -12.3  | 317.5 | 315.0 | -283.951522 | 85.9  |
| val+07_64: | -6.9   | 353.9 | 350.5 | -283.953570 | 107.1 |
| val+07_66: | 21.6   | 325.7 | 322.9 | -283.939511 | 91.5  |
| val+07_69: | -78.3  | 335.1 | 332.6 | -283.978661 | 84.6  |
| val+07_6:  | -196.1 | 313.5 | 311.3 | -284.021063 | 79.7  |
| val+07_71: | -245.3 | 352.2 | 349.2 | -284.044205 | 98.8  |
| val+07_72: | -85.2  | 334.0 | 331.3 | -283.981149 | 90.8  |
| val+07_74: | 84.1   | 383.4 | 380.6 | -283.922270 | 93.7  |
| val+07_75: | -59.5  | 341.6 | 338.7 | -283.972235 | 94.1  |
| val+07_78: | -44.7  | 347.0 | 343.9 | -283.967185 | 97.9  |
| val+07_79: | -326.7 | 344.6 | 342.2 | -284.074358 | 83.8  |
| val+07_80: | -205.1 | 376.7 | 373.4 | -284.031670 | 104.5 |
| val+07_81: | -268.5 | 366.1 | 363.1 | -284.054618 | 98.4  |
| val+07_82: | -62.0  | 368.7 | 365.5 | -283.976267 | 102.5 |
| val+07_84: | -322.9 | 348.5 | 345.8 | -284.073338 | 90.3  |
| val+07_85: | 151.8  | 375.4 | 371.9 | -283.895578 | 109.1 |
| val+07_86: | -51.3  | 313.7 | 311.7 | -283.965937 | 73.1  |
| val+07_87: | 173.5  | 366.9 | 364.1 | -283.886372 | 92.9  |
| val+07_88: | 242.0  | 313.0 | 310.6 | -283.854134 | 82.7  |
| val+07_89: | -322.9 | 348.7 | 346.0 | -284.073360 | 90.3  |
| val+07_8:  | -120.2 | 318.4 | 315.8 | -283.992708 | 88.4  |
| val+07_90: | 33.5   | 362.0 | 358.9 | -283.939109 | 99.3  |
| val+07_91: | 83.6   | 377.6 | 374.7 | -283.921810 | 94.4  |
| val+07_92: | -386.7 | 306.6 | 304.6 | -284.092882 | 74.2  |
| val+07_93: | -386.7 | 306.9 | 304.8 | -284.092918 | 74.2  |
| val+07_94: | -259.7 | 362.9 | 359.9 | -284.050904 | 96.2  |
| val+07_95: | -221.6 | 369.0 | 365.9 | -284.037067 | 98.8  |
| val+07_97: | -11.5  | 313.6 | 311.4 | -283.950784 | 77.4  |
| val+07_98: | 120.7  | 349.1 | 345.9 | -283.904446 | 102.1 |
| val+07_99: | -214.5 | 319.3 | 316.9 | -284.028743 | 82.0  |
| val+07_9:  | 233.7  | 354.9 | 352.1 | -283.862065 | 93.7  |

val+03\_10

|   |          |          |          |
|---|----------|----------|----------|
| C | 0.16429  | 0.12606  | -0.31760 |
| C | -1.33185 | -0.01017 | -0.10219 |
| N | 0.68048  | 1.28242  | -0.32808 |
| O | 0.87516  | -1.02088 | -0.48941 |
| O | -1.94882 | 1.23403  | 0.06182  |
| H | -1.75902 | -0.54853 | -0.96680 |
| H | -1.49781 | -0.64991 | 0.78273  |
| H | 1.69057  | 1.25783  | -0.47990 |
| H | 0.28435  | -1.79150 | -0.44495 |
| H | -1.22357 | 1.88826  | -0.00732 |

val+03\_11

|   |          |         |          |
|---|----------|---------|----------|
| C | 0.22607  | 0.71955 | 0.12268  |
| C | -1.25279 | 0.65508 | -0.08195 |

Supplementary Material (ESI) for PCCP  
This journal is © the Owner Societies 2011

|   |          |          |          |
|---|----------|----------|----------|
| N | 1.08074  | -0.23302 | 0.14649  |
| O | 0.69641  | 1.98237  | 0.30517  |
| O | 0.47136  | -1.49879 | -0.05711 |
| H | -1.52950 | 1.23136  | -0.97184 |
| H | -1.76497 | 1.10713  | 0.77447  |
| H | -1.57660 | -0.37844 | -0.20038 |
| H | 1.66103  | 1.90558  | 0.42556  |
| H | 1.23674  | -2.09062 | -0.00500 |

val+03\_12

|   |          |          |          |
|---|----------|----------|----------|
| C | 0.43418  | -0.32829 | 0.18268  |
| C | -1.90979 | -0.62817 | 0.12905  |
| N | -0.55989 | -1.08191 | 0.36729  |
| O | 0.48805  | 0.97447  | -0.24405 |
| O | 1.68484  | -0.77647 | 0.41441  |
| H | -2.04338 | 0.45986  | -0.03407 |
| H | -2.53743 | -0.89094 | 0.98822  |
| H | -2.33034 | -1.13872 | -0.74685 |
| H | -0.41308 | 1.28781  | -0.42342 |
| H | 2.30103  | -0.05534 | 0.20665  |

val+03\_13

|   |          |          |          |
|---|----------|----------|----------|
| C | -0.04860 | -0.97954 | 0.17409  |
| C | 1.26118  | -1.12275 | -0.04994 |
| N | -0.86484 | 0.04659  | -0.33371 |
| O | -0.23006 | 1.18660  | -0.73263 |
| O | 0.26575  | 1.93612  | 0.47031  |
| H | -0.61598 | -1.70791 | 0.74935  |
| H | 1.82112  | -0.42189 | -0.66083 |
| H | 1.78958  | -1.98040 | 0.34847  |
| H | -1.66785 | 0.28090  | 0.24705  |
| H | 1.11352  | 1.47607  | 0.62064  |

val+03\_14

|   |          |          |          |
|---|----------|----------|----------|
| C | 0.16977  | -0.75453 | -0.25464 |
| C | 1.47831  | -0.99598 | -0.24704 |
| N | -1.72379 | 0.47065  | 0.24699  |
| O | -0.42308 | 0.04047  | 0.69623  |
| O | -1.59101 | 1.80212  | -0.23679 |
| H | -0.53007 | -1.18144 | -0.96978 |
| H | 2.13727  | -0.54225 | 0.48566  |
| H | 1.90467  | -1.67999 | -0.97142 |
| H | -2.16420 | 0.64177  | 1.15237  |
| H | -1.57566 | 1.68078  | -1.20088 |

val+03\_15

|   |          |          |          |
|---|----------|----------|----------|
| C | -0.36661 | 0.54184  | -0.21581 |
| C | 0.92459  | 0.23507  | 0.00694  |
| N | -0.95265 | 1.78700  | -0.03646 |
| O | 1.40712  | -0.94886 | -0.45939 |
| O | 1.75825  | -1.79781 | 0.74456  |
| H | -1.00482 | -0.20899 | -0.67390 |
| H | 1.63607  | 0.90558  | 0.49131  |
| H | -1.94062 | 1.76641  | 0.18239  |
| H | -0.44757 | 2.42119  | 0.57246  |
| H | 2.63675  | -2.09563 | 0.44581  |

val+03\_16

|   |          |          |          |
|---|----------|----------|----------|
| C | 0.26404  | 0.09018  | 0.40703  |
| C | 1.46620  | -0.10392 | -0.14317 |
| N | -1.66798 | 1.27213  | -0.01394 |
| O | -0.28261 | 1.35388  | 0.43161  |
| O | 2.18389  | -1.26830 | -0.12160 |
| H | -0.32233 | -0.69215 | 0.88837  |
| H | 2.00575  | 0.69574  | -0.63895 |
| H | -1.62125 | 1.57276  | -0.99304 |
| H | -2.08616 | 2.05820  | 0.48769  |
| H | 1.66715  | -1.94793 | 0.34108  |

val+03\_17

|   |          |          |          |
|---|----------|----------|----------|
| C | -0.19055 | 0.45414  | -0.02474 |
| C | 1.13354  | 0.26924  | -0.04279 |
| N | -0.88777 | 1.64509  | -0.24434 |
| O | -1.15367 | -0.53125 | 0.13459  |
| O | -0.55080 | -1.79293 | 0.47279  |
| H | 1.79377  | 1.12134  | -0.15258 |
| H | 1.56675  | -0.71431 | 0.05560  |

Supplementary Material (ESI) for PCCP  
This journal is © the Owner Societies 2011

|   |          |          |          |
|---|----------|----------|----------|
| H | -1.67405 | 1.76191  | 0.38852  |
| H | -0.28083 | 2.45584  | -0.21986 |
| H | -0.56300 | -2.22918 | -0.40029 |

|           |          |          |          |
|-----------|----------|----------|----------|
| val+03_18 |          |          |          |
| C         | 0.15787  | -0.06642 | 0.13024  |
| C         | 1.47734  | -0.17008 | -0.05867 |
| N         | -1.56824 | 1.41029  | -0.37249 |
| O         | -0.41493 | 1.11152  | 0.48352  |
| O         | -0.75266 | -1.07892 | 0.10736  |
| H         | 2.09084  | 0.72040  | -0.07182 |
| H         | 1.96007  | -1.13569 | -0.16316 |
| H         | -2.36381 | 1.12874  | 0.20608  |
| H         | -1.55498 | 2.43124  | -0.33658 |
| H         | -0.34210 | -1.85025 | -0.31277 |

|           |          |          |          |
|-----------|----------|----------|----------|
| val+03_19 |          |          |          |
| C         | 0.97440  | -0.54871 | 0.14629  |
| C         | -1.30824 | -0.79717 | -0.21700 |
| N         | 0.03009  | -0.49358 | -0.69758 |
| O         | -2.27094 | 0.01260  | -0.84954 |
| O         | -2.03937 | 1.37200  | -0.39274 |
| H         | 0.83605  | -0.79219 | 1.21090  |
| H         | 1.99612  | -0.34717 | -0.18090 |
| H         | -1.39934 | -0.71671 | 0.87856  |
| H         | -1.57997 | -1.81003 | -0.54095 |
| H         | -1.41299 | 1.67526  | -1.07735 |

|          |          |          |          |
|----------|----------|----------|----------|
| val+03_1 |          |          |          |
| C        | -0.12773 | -0.41330 | -0.01626 |
| C        | 1.18406  | -0.51899 | -0.24597 |
| N        | -0.86429 | 0.80312  | 0.10140  |
| O        | 1.90663  | -1.68663 | -0.24963 |
| O        | -0.08939 | 1.91336  | -0.37824 |
| H        | -0.74740 | -1.28494 | 0.19321  |
| H        | 1.80998  | 0.33895  | -0.45273 |
| H        | -1.67009 | 0.77690  | -0.52603 |
| H        | 1.30930  | -2.42823 | -0.06173 |
| H        | -0.00628 | 2.46387  | 0.41709  |

|           |          |          |          |
|-----------|----------|----------|----------|
| val+03_20 |          |          |          |
| C         | 1.68200  | -0.12079 | 0.14433  |
| C         | -1.70701 | -0.55320 | -0.26140 |
| N         | 0.57058  | -0.20852 | -0.47012 |
| O         | -0.45062 | -0.63358 | 0.39749  |
| O         | -2.21214 | 0.74552  | -0.33981 |
| H         | 2.54323  | 0.17560  | -0.44678 |
| H         | 1.79532  | -0.32990 | 1.20899  |
| H         | -2.34570 | -1.22058 | 0.33209  |
| H         | -1.61344 | -0.91038 | -1.28880 |
| H         | -2.33162 | 1.07093  | 0.56710  |

|           |          |          |          |
|-----------|----------|----------|----------|
| val+03_21 |          |          |          |
| C         | 0.69757  | -0.61222 | -0.17429 |
| C         | -0.78238 | -0.64497 | 0.14434  |
| N         | 1.51508  | -1.58623 | -0.15275 |
| O         | -1.22107 | 0.49697  | 0.87116  |
| O         | -1.25310 | 1.59478  | -0.09302 |
| H         | 1.08222  | 0.36746  | -0.47450 |
| H         | -1.37487 | -0.74071 | -0.77694 |
| H         | -1.02480 | -1.48877 | 0.80226  |
| H         | 1.04066  | -2.45136 | 0.14128  |
| H         | -0.75549 | 2.26284  | 0.41165  |

|           |          |          |          |
|-----------|----------|----------|----------|
| val+03_22 |          |          |          |
| C         | 0.68198  | -0.24504 | -0.06028 |
| C         | -1.65821 | -0.56951 | -0.31402 |
| N         | 1.87280  | -0.34948 | -0.47041 |
| O         | -0.32563 | -0.85349 | -0.73211 |
| O         | -2.27157 | 0.41119  | -1.08919 |
| H         | 0.34288  | 0.29873  | 0.83626  |
| H         | -1.65051 | -0.31166 | 0.75741  |
| H         | -2.22595 | -1.48612 | -0.47322 |
| H         | 2.49860  | 0.14598  | 0.16603  |
| H         | -1.83459 | 1.26180  | -0.92248 |

val+03\_23

Supplementary Material (ESI) for PCCP  
This journal is © the Owner Societies 2011

|   |          |          |          |
|---|----------|----------|----------|
| C | 0.40106  | 1.14750  | -0.09505 |
| C | -1.04156 | 1.17913  | 0.31933  |
| N | 1.17006  | 0.12599  | -0.15878 |
| O | 0.47521  | -1.04257 | 0.18139  |
| O | 1.45768  | -2.08043 | 0.33212  |
| H | 0.89497  | 2.07127  | -0.39177 |
| H | -1.33239 | 2.18709  | 0.62721  |
| H | -1.69148 | 0.87911  | -0.51342 |
| H | -1.22355 | 0.47990  | 1.14105  |
| H | 1.67928  | -2.26450 | -0.60130 |

val+03\_24

|   |          |          |          |
|---|----------|----------|----------|
| C | -0.07854 | -0.14863 | -0.10173 |
| C | -2.38745 | -0.16629 | 0.08481  |
| N | -1.13024 | -0.82405 | -0.22078 |
| O | 1.12305  | -0.75663 | -0.37700 |
| O | 2.16280  | 0.25026  | -0.25936 |
| H | 0.03376  | 0.89902  | 0.19957  |
| H | -2.28123 | 0.88762  | 0.39161  |
| H | -3.03984 | -0.20652 | -0.79518 |
| H | -2.89652 | -0.71110 | 0.88847  |
| H | 2.73292  | -0.18967 | 0.39749  |

val+03\_25

|   |          |          |          |
|---|----------|----------|----------|
| C | 0.10686  | -0.26912 | 0.23293  |
| C | -2.23211 | -0.28776 | 0.14247  |
| N | 1.21275  | -0.71856 | 0.67839  |
| O | -1.04024 | -0.64299 | 0.83841  |
| O | 2.27933  | -0.15959 | -0.06999 |
| H | 0.03738  | 0.42472  | -0.60954 |
| H | -2.27523 | 0.79201  | -0.05131 |
| H | -3.05939 | -0.56896 | 0.79566  |
| H | -2.31797 | -0.83186 | -0.80656 |
| H | 3.04802  | -0.57699 | 0.34706  |

val+03\_26

|   |          |          |          |
|---|----------|----------|----------|
| C | 1.61196  | 0.55220  | -0.18863 |
| C | -1.71981 | -0.21186 | 0.12509  |
| N | 0.35050  | 0.77550  | -0.18955 |
| O | -0.31804 | -0.44270 | 0.12302  |
| O | 2.22092  | -0.61908 | 0.06082  |
| H | 2.28720  | 1.37170  | -0.40791 |
| H | -1.99422 | 0.53363  | 0.88041  |
| H | -2.06435 | 0.12428  | -0.85975 |
| H | -2.17567 | -1.17469 | 0.36991  |
| H | 1.50571  | -1.26038 | 0.24029  |

val+03\_27

|   |          |          |          |
|---|----------|----------|----------|
| C | 0.21763  | 0.82787  | 0.12569  |
| C | -1.24459 | 0.55538  | -0.04932 |
| N | 0.73486  | 1.97728  | -0.00784 |
| O | 1.05479  | -0.22750 | 0.45114  |
| O | 0.32030  | -1.47020 | 0.66614  |
| H | -1.72925 | 1.49371  | -0.32078 |
| H | -1.68284 | 0.16394  | 0.87371  |
| H | -1.41667 | -0.19174 | -0.83027 |
| H | 1.74511  | 1.95053  | 0.16662  |
| H | 0.76336  | -2.02807 | 0.00090  |

val+03\_28

|   |          |          |          |
|---|----------|----------|----------|
| C | 0.52342  | -0.28199 | -0.34110 |
| C | -1.82134 | -0.55774 | -0.33149 |
| N | 0.58861  | 0.80321  | 0.32048  |
| O | -0.53532 | -1.02983 | -0.71902 |
| O | 1.63321  | -0.89064 | -0.80055 |
| H | -2.02779 | 0.42924  | -0.76294 |
| H | -2.53363 | -1.28367 | -0.72481 |
| H | -1.91315 | -0.50878 | 0.76037  |
| H | -0.32111 | 1.15583  | 0.60739  |
| H | 2.36990  | -0.32594 | -0.50982 |

val+03\_29

|   |          |          |          |
|---|----------|----------|----------|
| C | 0.25259  | -0.94580 | 0.22269  |
| C | 1.40997  | -1.12678 | -0.41332 |
| N | -1.50623 | 1.30303  | -0.41256 |
| O | 0.02258  | 0.18692  | 0.94917  |
| O | -1.41675 | 0.56619  | 0.76523  |



Supplementary Material (ESI) for PCCP  
This journal is © the Owner Societies 2011

|   |          |          |          |
|---|----------|----------|----------|
| H | -0.54017 | -1.69056 | 0.27552  |
| H | 2.16100  | -0.34475 | -0.44699 |
| H | 1.64043  | -2.08499 | -0.86612 |
| H | -2.22895 | 0.85150  | -0.97192 |
| H | -1.81197 | 2.23663  | -0.13920 |

val+03\_2

|   |          |          |          |
|---|----------|----------|----------|
| C | 0.35736  | -0.90714 | -0.17819 |
| C | 1.69004  | -0.97560 | -0.18080 |
| N | -0.39656 | 0.24230  | -0.53161 |
| O | -1.47998 | 0.31945  | 0.40664  |
| O | 0.35744  | 1.42041  | -0.42889 |
| H | -0.28288 | -1.75510 | 0.03870  |
| H | 2.30975  | -0.12418 | -0.43696 |
| H | 2.18251  | -1.91712 | 0.03451  |
| H | -2.16500 | 0.77632  | -0.11066 |
| H | 0.71453  | 1.42674  | 0.48737  |

val+03\_30

|   |          |          |          |
|---|----------|----------|----------|
| C | 1.81843  | 0.42388  | 0.10520  |
| C | -2.14173 | -0.47408 | 0.15582  |
| N | 0.71980  | -0.07196 | -0.31040 |
| O | -1.46595 | 0.27506  | -0.84622 |
| O | -0.30466 | 0.86665  | -0.22644 |
| H | 1.92218  | 1.44983  | 0.46143  |
| H | 2.68223  | -0.23311 | 0.08970  |
| H | -2.44756 | 0.16418  | 0.99327  |
| H | -3.02604 | -0.86701 | -0.35550 |
| H | -1.52190 | -1.30414 | 0.51383  |

val+03\_31

|   |          |          |          |
|---|----------|----------|----------|
| C | 1.68457  | 0.54870  | -0.12524 |
| C | -1.54417 | -0.00499 | -0.02944 |
| N | 2.12858  | -0.61621 | 0.05028  |
| O | 0.45753  | 1.09792  | 0.17218  |
| O | -0.39466 | 0.10249  | 0.80282  |
| H | 2.27843  | 1.34795  | -0.57239 |
| H | -2.05839 | 0.95803  | -0.11746 |
| H | -2.18361 | -0.72039 | 0.49683  |
| H | -1.28807 | -0.39066 | -1.02293 |
| H | 1.41870  | -1.20535 | 0.49436  |

val+03\_32

|   |          |          |          |
|---|----------|----------|----------|
| C | 0.84842  | -1.30960 | -0.04047 |
| C | -0.53929 | -0.69150 | 0.01979  |
| N | -0.54340 | 0.46337  | 0.90984  |
| O | 1.22615  | -2.02855 | -0.93542 |
| O | 0.12609  | 1.52842  | 0.19355  |
| H | 1.49432  | -1.06684 | 0.83304  |
| H | -0.87807 | -0.47267 | -1.00305 |
| H | -1.22125 | -1.43873 | 0.45345  |
| H | -1.50364 | 0.80006  | 0.99268  |
| H | 0.78758  | 1.82894  | 0.83689  |

val+03\_33

|   |          |          |          |
|---|----------|----------|----------|
| C | 0.74130  | -1.00942 | 0.23892  |
| C | -1.48664 | 0.03909  | -0.07923 |
| N | -0.09761 | -0.15356 | -0.42799 |
| O | 1.94306  | -1.07089 | 0.06911  |
| O | -1.70798 | 0.82349  | 1.07647  |
| H | 0.19231  | -1.66327 | 0.94447  |
| H | -1.99381 | 0.45480  | -0.95956 |
| H | -1.93120 | -0.93269 | 0.14918  |
| H | 0.36063  | 0.50526  | -1.04788 |
| H | -1.37226 | 1.71799  | 0.90603  |

val+03\_34

|   |          |          |          |
|---|----------|----------|----------|
| C | 1.17474  | -0.84490 | 0.19367  |
| C | -0.26428 | -0.49263 | -0.18258 |
| N | -0.41260 | 0.93836  | -0.07204 |
| O | 1.98570  | -1.29772 | -0.57739 |
| O | -1.06685 | -1.26659 | 0.71178  |
| H | 1.42471  | -0.63909 | 1.25874  |
| H | -0.42247 | -0.78133 | -1.22804 |
| H | -1.26587 | 1.27146  | -0.51416 |
| H | -0.43533 | 1.21514  | 0.90772  |
| H | -1.98456 | -1.24179 | 0.39721  |

|           |          |          |          |
|-----------|----------|----------|----------|
| val+03_35 |          |          |          |
| C         | 0.12083  | 1.01476  | -0.07139 |
| C         | -1.38831 | 0.96517  | 0.01781  |
| N         | 0.77194  | -0.21822 | -0.12772 |
| O         | 0.78417  | 2.03634  | -0.03817 |
| O         | 0.04267  | -1.30036 | -0.67601 |
| H         | -1.75334 | 1.97256  | 0.22177  |
| H         | -1.81232 | 0.60081  | -0.92372 |
| H         | -1.71844 | 0.28153  | 0.80675  |
| H         | 1.69638  | -0.16317 | -0.54901 |
| H         | -0.00886 | -1.93803 | 0.05598  |

|           |          |          |          |
|-----------|----------|----------|----------|
| val+03_36 |          |          |          |
| C         | 0.68427  | -0.09985 | 0.01871  |
| C         | -1.46071 | 1.17968  | 0.21066  |
| N         | -0.01241 | 1.06066  | 0.15912  |
| O         | 1.88657  | -0.18011 | -0.16181 |
| O         | -0.12724 | -1.19303 | 0.12572  |
| H         | -1.71845 | 2.15169  | 0.63996  |
| H         | -1.92804 | 1.09742  | -0.78007 |
| H         | -1.87103 | 0.39765  | 0.85192  |
| H         | 0.54123  | 1.88477  | -0.02219 |
| H         | 0.47442  | -1.95238 | 0.04158  |

|           |          |          |          |
|-----------|----------|----------|----------|
| val+03_37 |          |          |          |
| C         | 0.10286  | 0.03673  | -0.01242 |
| C         | -1.41972 | -0.03714 | 0.15927  |
| N         | 0.75391  | -1.13894 | -0.20263 |
| O         | 0.66926  | 1.12377  | 0.02600  |
| O         | -1.93908 | 1.24903  | 0.34381  |
| H         | -1.85740 | -0.51680 | -0.73179 |
| H         | -1.65140 | -0.68503 | 1.02081  |
| H         | 1.75760  | -1.12773 | -0.31694 |
| H         | 0.27307  | -2.02561 | -0.22901 |
| H         | -1.15609 | 1.83660  | 0.30870  |

|           |          |          |          |
|-----------|----------|----------|----------|
| val+03_38 |          |          |          |
| C         | 1.04675  | 0.00648  | 0.07013  |
| C         | -0.46033 | 0.18766  | -0.10119 |
| N         | -0.82275 | 1.57849  | 0.11206  |
| O         | 1.83869  | 0.91235  | -0.00087 |
| O         | 1.47191  | -1.26822 | 0.25628  |
| H         | -0.98727 | -0.46135 | 0.61542  |
| H         | -0.69910 | -0.20752 | -1.10740 |
| H         | -1.61366 | 1.83902  | -0.46976 |
| H         | -0.02881 | 2.15784  | -0.15666 |
| H         | 0.71058  | -1.86767 | 0.33220  |

|           |          |          |          |
|-----------|----------|----------|----------|
| val+03_39 |          |          |          |
| C         | 0.74692  | -0.89292 | 0.13827  |
| C         | -1.50340 | 0.24049  | 0.17999  |
| N         | -0.06857 | 0.17896  | 0.11510  |
| O         | 1.95811  | -0.79251 | -0.05817 |
| O         | 0.53329  | 1.39911  | -0.21443 |
| H         | 0.22423  | -1.83607 | 0.36513  |
| H         | -1.81744 | 0.94929  | 0.95357  |
| H         | -1.92165 | 0.55430  | -0.78368 |
| H         | -1.87529 | -0.75622 | 0.43186  |
| H         | 1.47300  | 1.11218  | -0.31265 |

|          |          |          |          |
|----------|----------|----------|----------|
| val+03_3 |          |          |          |
| C        | -0.13052 | -0.47019 | -0.06489 |
| C        | 1.18573  | -0.61829 | -0.24948 |
| N        | -0.82727 | 0.74696  | 0.09023  |
| O        | -1.04533 | -1.47864 | 0.07497  |
| O        | -0.09271 | 1.84676  | -0.43244 |
| H        | 1.82097  | 0.24486  | -0.38356 |
| H        | 1.63535  | -1.60511 | -0.27558 |
| H        | -1.70712 | 0.71147  | -0.42462 |
| H        | -0.57701 | -2.32219 | -0.01480 |
| H        | 0.05440  | 2.39636  | 0.35447  |

|           |          |          |          |
|-----------|----------|----------|----------|
| val+03_40 |          |          |          |
| C         | -0.08240 | -0.73330 | 0.27238  |
| C         | 1.33535  | -0.73408 | -0.29977 |
| N         | -0.30060 | 0.60819  | 0.92467  |

Supplementary Material (ESI) for PCCP  
This journal is © the Owner Societies 2011

|   |          |          |          |
|---|----------|----------|----------|
| O | -1.30072 | 1.15817  | 0.51305  |
| O | -1.03781 | -1.03271 | -0.68349 |
| H | -0.13630 | -1.41910 | 1.13836  |
| H | 1.55269  | -1.72382 | -0.70982 |
| H | 1.41167  | 0.00133  | -1.10665 |
| H | 2.06850  | -0.49766 | 0.47714  |
| H | -1.69227 | -0.30201 | -0.62728 |

|           |          |          |          |
|-----------|----------|----------|----------|
| val+03_41 |          |          |          |
| C         | -0.04751 | -0.70956 | 0.39690  |
| C         | -1.37131 | -0.47637 | -0.34356 |
| N         | 1.03855  | -0.90675 | -0.60659 |
| O         | 1.88664  | -0.04377 | -0.56859 |
| O         | -1.37084 | 0.71806  | -1.10180 |
| H         | -0.10998 | -1.64783 | 0.96391  |
| H         | 0.21020  | 0.12316  | 1.06428  |
| H         | -2.19367 | -0.50448 | 0.38825  |
| H         | -1.53479 | -1.28626 | -1.06084 |
| H         | -1.28188 | 1.46581  | -0.49017 |

|           |          |          |          |
|-----------|----------|----------|----------|
| val+03_42 |          |          |          |
| C         | 1.13348  | -1.01852 | -0.22453 |
| C         | -0.32869 | -1.13071 | 0.16616  |
| N         | -0.95793 | 1.03906  | -0.31775 |
| O         | 1.78724  | -0.00349 | -0.13977 |
| O         | -0.84903 | 0.04272  | 0.73161  |
| H         | 1.57855  | -1.96280 | -0.61656 |
| H         | -0.89924 | -1.44839 | -0.72255 |
| H         | -0.42897 | -1.91691 | 0.92844  |
| H         | -1.73960 | 1.60365  | 0.01835  |
| H         | -0.11802 | 1.60868  | -0.18741 |

|           |          |          |          |
|-----------|----------|----------|----------|
| val+03_43 |          |          |          |
| C         | -0.97384 | 1.13573  | -0.04638 |
| C         | -0.42779 | -1.14662 | -0.23683 |
| N         | 0.87678  | -1.11215 | 0.34839  |
| O         | -0.92978 | 1.08239  | 1.16166  |
| O         | -0.75293 | 0.12055  | -0.88899 |
| H         | -1.21363 | 2.04373  | -0.62127 |
| H         | -1.24299 | -1.34740 | 0.46774  |
| H         | -0.45687 | -1.86771 | -1.05406 |
| H         | 0.84916  | -0.83138 | 1.32248  |
| H         | 1.37218  | -1.99014 | 0.24717  |

|           |          |          |          |
|-----------|----------|----------|----------|
| val+03_44 |          |          |          |
| C         | 1.59853  | -0.39565 | 0.09134  |
| C         | -1.75361 | -0.31660 | 0.04879  |
| N         | 0.45882  | 0.38255  | 0.07902  |
| O         | 2.68659  | 0.01706  | 0.43593  |
| O         | -0.58448 | -0.08066 | -0.74029 |
| H         | 1.37896  | -1.43964 | -0.19761 |
| H         | -2.10782 | 0.60786  | 0.52175  |
| H         | -2.50384 | -0.68017 | -0.65792 |
| H         | -1.56641 | -1.07185 | 0.82056  |
| H         | 0.59954  | 1.38648  | -0.01466 |

|           |          |          |          |
|-----------|----------|----------|----------|
| val+03_45 |          |          |          |
| C         | 1.14459  | -1.13416 | 0.13294  |
| C         | -1.16278 | 1.25667  | -0.06719 |
| N         | -0.01086 | 0.79408  | 0.70887  |
| O         | 1.87169  | -1.83828 | -0.50986 |
| O         | 0.89834  | 0.15718  | -0.22926 |
| H         | 0.60380  | -1.40908 | 1.05347  |
| H         | -0.88762 | 1.84964  | -0.94974 |
| H         | -1.77820 | 1.86538  | 0.60396  |
| H         | -1.74870 | 0.39101  | -0.38698 |
| H         | 0.53314  | 1.60806  | 0.99799  |

|           |          |          |          |
|-----------|----------|----------|----------|
| val+03_46 |          |          |          |
| C         | 0.63193  | 0.98022  | 0.32078  |
| C         | -0.85427 | 0.80607  | 0.11499  |
| N         | 0.71291  | -1.38465 | 0.08878  |
| O         | 1.18688  | 2.03478  | 0.49872  |
| O         | 1.42827  | -0.14334 | 0.30690  |
| H         | -1.31086 | 1.79572  | 0.15652  |
| H         | -1.06605 | 0.33196  | -0.84732 |
| H         | -1.28504 | 0.15853  | 0.88370  |

Supplementary Material (ESI) for PCCP  
This journal is © the Owner Societies 2011

|           |          |          |          |
|-----------|----------|----------|----------|
| H         | 1.20882  | -1.78140 | -0.71227 |
| H         | 1.00731  | -1.94680 | 0.89022  |
| val+03_47 |          |          |          |
| C         | 0.50274  | 0.20616  | 0.02556  |
| C         | -1.81810 | -0.12827 | -0.12359 |
| N         | 1.71036  | -0.20454 | -0.47448 |
| O         | 0.34265  | 1.10678  | 0.82534  |
| O         | -0.50202 | -0.51908 | -0.53460 |
| H         | -2.01811 | 0.91039  | -0.40065 |
| H         | -2.49825 | -0.80017 | -0.64896 |
| H         | -1.93533 | -0.23489 | 0.95831  |
| H         | 2.52562  | 0.10816  | 0.03035  |
| H         | 1.76345  | -1.09795 | -0.94138 |
| val+03_48 |          |          |          |
| C         | -0.58058 | -1.11057 | -0.21796 |
| C         | 0.85354  | -1.31980 | 0.24452  |
| N         | -1.44847 | 1.06734  | -0.03458 |
| O         | -1.54621 | 2.12794  | -0.54599 |
| O         | -0.72193 | 0.17013  | -0.86462 |
| H         | -1.28562 | -1.15111 | 0.61972  |
| H         | -0.87680 | -1.85732 | -0.96161 |
| H         | 0.96695  | -2.32010 | 0.67795  |
| H         | 1.12748  | -0.58086 | 1.00471  |
| H         | 1.55053  | -1.22654 | -0.59435 |
| val+03_49 |          |          |          |
| C         | -0.42676 | -1.15648 | -0.04082 |
| C         | -0.99970 | 1.13640  | 0.02354  |
| N         | 0.94170  | -1.27641 | 0.58696  |
| O         | 1.64264  | -0.30855 | 0.40322  |
| O         | -0.68993 | -0.01080 | -0.76370 |
| H         | -1.12269 | -1.32551 | 0.80020  |
| H         | -0.48797 | -2.02209 | -0.71303 |
| H         | -0.13661 | 1.47502  | 0.60531  |
| H         | -1.84216 | 0.93084  | 0.70090  |
| H         | -1.29092 | 1.92057  | -0.67849 |
| val+03_4  |          |          |          |
| C         | -0.25160 | 0.02088  | -0.12148 |
| C         | 1.08291  | -0.11888 | -0.01331 |
| N         | -0.96346 | 1.21724  | -0.17380 |
| O         | -1.06465 | -1.06097 | -0.26017 |
| O         | 1.60383  | -1.41193 | -0.20324 |
| H         | 1.78103  | 0.71005  | 0.04376  |
| H         | -1.86867 | 1.14047  | 0.27976  |
| H         | -0.44261 | 2.00729  | 0.18928  |
| H         | -0.45375 | -1.81965 | -0.33079 |
| H         | 2.00085  | -1.70330 | 0.63358  |
| val+03_50 |          |          |          |
| C         | 0.55551  | -0.15916 | 0.03902  |
| C         | -0.11144 | 1.16517  | -0.02200 |
| N         | 1.04859  | 0.83420  | -0.88009 |
| O         | 0.01980  | -1.26578 | -0.63598 |
| O         | -0.84649 | -1.94030 | 0.32367  |
| H         | 1.13247  | -0.43301 | 0.92226  |
| H         | -1.04525 | 1.27260  | -0.56831 |
| H         | 0.01894  | 1.84743  | 0.81681  |
| H         | 1.91419  | 1.24878  | -0.53858 |
| H         | -1.71882 | -1.64254 | 0.00589  |
| val+03_51 |          |          |          |
| C         | 0.93804  | -0.08625 | -0.33577 |
| C         | 0.38900  | 1.25604  | -0.16203 |
| N         | 0.12453  | -1.26583 | -0.37659 |
| O         | 1.15432  | 0.62204  | 0.88551  |
| O         | -1.07884 | -1.08069 | 0.38790  |
| H         | 1.83503  | -0.24179 | -0.93869 |
| H         | -0.67139 | 1.36488  | 0.05339  |
| H         | 0.86898  | 2.10834  | -0.64454 |
| H         | 0.61510  | -2.01226 | 0.11962  |
| H         | -1.76747 | -1.24118 | -0.27720 |
| val+03_52 |          |          |          |
| C         | 0.56473  | 0.54584  | 0.39839  |

Supplementary Material (ESI) for PCCP  
This journal is © the Owner Societies 2011

|   |          |          |          |
|---|----------|----------|----------|
| C | -0.40553 | -0.46199 | -0.16797 |
| N | 0.11894  | 1.81298  | 0.90880  |
| O | 0.82639  | 1.66176  | -0.40740 |
| O | -0.93061 | -1.21037 | 0.91844  |
| H | 1.41874  | 0.12259  | 0.93012  |
| H | -1.18708 | 0.08205  | -0.72358 |
| H | 0.13055  | -1.10184 | -0.88698 |
| H | -0.86544 | 1.92373  | 0.62816  |
| H | -1.42299 | -1.96234 | 0.55733  |

val+03\_53

|   |          |          |          |
|---|----------|----------|----------|
| C | -0.01675 | -0.33959 | 0.03582  |
| C | -0.79266 | 0.98481  | 0.12428  |
| N | 0.99978  | 0.41307  | -0.74900 |
| O | 0.37649  | 1.69809  | -0.33371 |
| O | -0.55596 | -1.43315 | -0.63037 |
| H | 0.33253  | -0.71601 | 1.00310  |
| H | -1.12313 | 1.32319  | 1.11181  |
| H | -1.62641 | 1.04317  | -0.58976 |
| H | 1.92018  | 0.41275  | -0.29841 |
| H | -0.68338 | -1.15924 | -1.55547 |

val+03\_54

|   |          |          |          |
|---|----------|----------|----------|
| C | 0.18718  | -0.38145 | 0.04636  |
| C | -0.59788 | 0.92000  | -0.04933 |
| N | 0.61321  | 1.63681  | 0.46259  |
| O | 1.34572  | 0.34115  | 0.51204  |
| O | -0.36717 | -1.25723 | 0.97401  |
| H | 0.42622  | -0.90353 | -0.89320 |
| H | -0.93291 | 1.21472  | -1.04857 |
| H | -1.42959 | 0.96935  | 0.65730  |
| H | 1.06380  | 2.11767  | -0.32220 |
| H | 0.20752  | -2.03639 | 1.04430  |

val+03\_55

|   |          |          |          |
|---|----------|----------|----------|
| C | 0.21941  | -0.81821 | 0.06970  |
| C | 0.46271  | 1.14198  | -0.30073 |
| N | -0.22665 | 0.38424  | 0.75887  |
| O | 1.01455  | -0.06575 | -0.85737 |
| O | -0.85517 | -1.50096 | -0.49803 |
| H | 0.85041  | -1.50469 | 0.65267  |
| H | -0.18826 | 1.68197  | -1.00405 |
| H | 1.24970  | 1.80995  | 0.06883  |
| H | -1.24154 | 0.46101  | 0.73394  |
| H | -0.54748 | -2.36953 | -0.80373 |

val+03\_56

|   |          |          |          |
|---|----------|----------|----------|
| C | 0.39785  | -0.61568 | -0.34633 |
| C | -0.29038 | 0.66590  | -0.32657 |
| N | -0.26843 | -1.84665 | -0.54784 |
| O | 0.20980  | 0.13858  | 0.90087  |
| O | 0.35378  | 1.76336  | -0.87072 |
| H | 1.43125  | -0.62099 | -0.68676 |
| H | -1.38317 | 0.70814  | -0.38227 |
| H | 0.22742  | -2.60942 | -0.09179 |
| H | -1.21243 | -1.82112 | -0.16985 |
| H | 0.06871  | 2.55267  | -0.38174 |

val+03\_57

|   |          |          |          |
|---|----------|----------|----------|
| C | 0.65785  | -0.06707 | -0.27494 |
| C | -0.32152 | -1.12171 | 0.16766  |
| N | 0.26489  | 1.28763  | -0.58910 |
| O | 1.05053  | 0.92098  | 0.64593  |
| O | -1.08530 | 1.46891  | -0.22390 |
| H | 1.45824  | -0.42673 | -0.92900 |
| H | -1.09699 | -0.69314 | 0.80217  |
| H | 0.21709  | -1.89347 | 0.72880  |
| H | -0.78594 | -1.59827 | -0.70326 |
| H | -1.17325 | 2.43647  | -0.25657 |

val+03\_58

|   |          |          |          |
|---|----------|----------|----------|
| C | 0.68572  | -0.57361 | -0.01391 |
| C | -0.79905 | 1.36730  | 0.14102  |
| N | 0.48375  | 0.81841  | -0.30201 |
| O | 1.23097  | 0.27347  | 0.92207  |
| O | -0.33832 | -1.37806 | 0.44979  |
| H | 1.38025  | -1.08852 | -0.68481 |

Supplementary Material (ESI) for PCCP  
This journal is © the Owner Societies 2011

|   |          |          |          |
|---|----------|----------|----------|
| H | -0.61980 | 2.36172  | 0.55741  |
| H | -1.32358 | 0.74222  | 0.86913  |
| H | -1.41307 | 1.47645  | -0.76145 |
| H | -0.45257 | -2.11559 | -0.16843 |

val+03\_59

|   |          |          |          |
|---|----------|----------|----------|
| C | -1.56084 | 0.61522  | 0.10792  |
| C | -0.65576 | -0.54623 | -0.08849 |
| N | -0.29337 | 0.54941  | 0.84863  |
| O | 0.59928  | 1.47262  | 0.17401  |
| O | 1.85794  | 1.39369  | 0.85416  |
| H | -2.44873 | 0.54870  | 0.73087  |
| H | -1.60780 | 1.34553  | -0.69606 |
| H | -0.09981 | -0.58686 | -1.02136 |
| H | -0.85315 | -1.50028 | 0.39308  |
| H | 2.28613  | 0.65140  | 0.38544  |

val+03\_5

|   |          |          |          |
|---|----------|----------|----------|
| C | 0.68202  | 0.02280  | 0.11114  |
| C | -0.64345 | -0.04708 | -0.06649 |
| N | -1.48487 | 1.07943  | -0.28909 |
| O | 1.33642  | 1.20640  | 0.28293  |
| O | 1.55856  | -1.03511 | 0.13343  |
| H | -1.12638 | -1.01902 | -0.12317 |
| H | -2.15593 | 1.19841  | 0.46917  |
| H | -0.92307 | 1.92672  | -0.32737 |
| H | 2.24881  | 1.08146  | -0.02649 |
| H | 1.10249  | -1.81953 | -0.20816 |

val+03\_60

|   |          |          |          |
|---|----------|----------|----------|
| C | -0.71755 | -0.73871 | 0.20396  |
| C | -1.61918 | 0.43133  | -0.18250 |
| N | 0.35282  | 0.26217  | 0.50149  |
| O | -0.47331 | 1.30928  | -0.17559 |
| O | 1.43907  | -0.03945 | -0.34612 |
| H | -0.42705 | -1.37128 | -0.63840 |
| H | -0.97684 | -1.34716 | 1.07396  |
| H | -2.10399 | 0.38760  | -1.16406 |
| H | -2.35577 | 0.71354  | 0.57968  |
| H | 2.17471  | 0.44367  | 0.06747  |

val+03\_61

|   |          |          |          |
|---|----------|----------|----------|
| C | 1.08069  | 0.97442  | -0.06914 |
| C | 0.96251  | -1.02711 | -0.08991 |
| N | 0.18037  | 0.03057  | -0.77342 |
| O | 1.98414  | -0.08682 | 0.27279  |
| O | -1.15114 | 0.10376  | -0.25008 |
| H | 0.59246  | 1.43049  | 0.80467  |
| H | 1.54792  | 1.73735  | -0.70306 |
| H | 1.33741  | -1.82643 | -0.74008 |
| H | 0.42276  | -1.44030 | 0.77482  |
| H | -1.69273 | 0.14366  | -1.05398 |

val+03\_62

|   |          |          |          |
|---|----------|----------|----------|
| C | -0.47147 | 1.55383  | -0.26345 |
| C | 0.39755  | -0.60135 | 0.44304  |
| N | 0.61177  | 0.62678  | -0.34723 |
| O | 0.61596  | 1.78973  | 0.59791  |
| O | -0.09315 | -1.60116 | -0.41053 |
| H | -1.40351 | 1.23747  | 0.21157  |
| H | -0.58240 | 2.24108  | -1.10283 |
| H | -0.34549 | -0.45871 | 1.23648  |
| H | 1.36333  | -0.86135 | 0.89597  |
| H | 0.58850  | -1.77372 | -1.08025 |

val+03\_63

|   |          |          |          |
|---|----------|----------|----------|
| C | -0.04136 | -0.19933 | 0.28722  |
| C | -0.34688 | 1.23274  | 0.32516  |
| N | -1.05071 | -1.18427 | 0.36673  |
| O | 0.13318  | 0.59599  | -0.89937 |
| O | 1.13745  | -0.71588 | 0.80026  |
| H | -1.37802 | 1.58799  | 0.28526  |
| H | 0.35413  | 1.92208  | 0.79704  |
| H | -0.73026 | -2.04534 | -0.07119 |
| H | -1.89946 | -0.87203 | -0.09492 |
| H | 1.85392  | -0.21444 | 0.37931  |

|           |          |          |          |
|-----------|----------|----------|----------|
| val+03_64 |          |          |          |
| C         | 0.24390  | -0.05962 | 0.33663  |
| C         | -0.90885 | -0.96864 | -0.02986 |
| N         | 0.04452  | 1.24677  | 0.87440  |
| O         | 0.50201  | 0.99762  | -0.54573 |
| O         | 1.33187  | -0.69675 | 0.89694  |
| H         | -1.73093 | -0.39367 | -0.46459 |
| H         | -0.58688 | -1.70562 | -0.77631 |
| H         | -1.26589 | -1.51036 | 0.85186  |
| H         | -0.95027 | 1.48328  | 0.76080  |
| H         | 1.56435  | -1.45271 | 0.33457  |

|           |          |          |          |
|-----------|----------|----------|----------|
| val+03_65 |          |          |          |
| C         | -0.62742 | 0.40348  | -0.16508 |
| C         | -0.01745 | -0.91380 | 0.11805  |
| N         | 0.51959  | -0.08707 | -0.94979 |
| O         | -0.43869 | 1.39256  | 0.80200  |
| O         | -0.58159 | -2.10982 | -0.32487 |
| H         | -1.55639 | 0.46240  | -0.73183 |
| H         | 0.56072  | -0.98790 | 1.04274  |
| H         | 1.37813  | 0.36736  | -0.63752 |
| H         | -0.50660 | 2.25562  | 0.36298  |
| H         | -1.22020 | -2.39473 | 0.34822  |

|           |          |          |          |
|-----------|----------|----------|----------|
| val+03_66 |          |          |          |
| C         | -0.57589 | -0.31484 | 0.28357  |
| C         | -1.14178 | 1.05603  | 0.14058  |
| N         | -0.04335 | 0.56806  | -0.73498 |
| O         | -1.20555 | -1.48043 | -0.13377 |
| O         | 1.23037  | 1.10877  | -0.32393 |
| H         | 0.06129  | -0.49812 | 1.14404  |
| H         | -2.07981 | 1.23586  | -0.38042 |
| H         | -0.86651 | 1.78621  | 0.89752  |
| H         | -1.40711 | -1.37044 | -1.07769 |
| H         | 1.61385  | 1.37660  | -1.17451 |

|           |          |          |          |
|-----------|----------|----------|----------|
| val+03_67 |          |          |          |
| C         | 0.03192  | -0.24575 | -0.09532 |
| C         | -0.45073 | 1.11915  | 0.17941  |
| N         | 0.41316  | 0.80005  | -1.00811 |
| O         | 0.96580  | -0.75290 | 0.80998  |
| O         | -0.75833 | -1.22696 | -0.67792 |
| H         | -1.46910 | 1.39703  | -0.07837 |
| H         | -0.00758 | 1.65449  | 1.01622  |
| H         | 1.37492  | 1.07649  | -0.80953 |
| H         | 1.42665  | -1.47517 | 0.34821  |
| H         | -1.25740 | -1.64733 | 0.04222  |

|           |          |          |          |
|-----------|----------|----------|----------|
| val+03_68 |          |          |          |
| C         | 0.37254  | 0.00458  | 0.26802  |
| C         | -0.43732 | -1.18159 | -0.18877 |
| N         | -0.33729 | 1.20589  | 0.73769  |
| O         | 0.99574  | 0.74738  | -0.81160 |
| O         | 0.64764  | 1.97332  | -0.02441 |
| H         | 1.13243  | -0.26985 | 1.01064  |
| H         | -1.18243 | -0.88037 | -0.93228 |
| H         | 0.22214  | -1.92928 | -0.64242 |
| H         | -0.94182 | -1.64761 | 0.66495  |
| H         | -1.18443 | 1.29012  | 0.15788  |

|           |          |          |          |
|-----------|----------|----------|----------|
| val+03_69 |          |          |          |
| C         | 0.38102  | -0.13441 | -0.22817 |
| C         | -0.50358 | -1.25477 | 0.25555  |
| N         | 0.62375  | 1.79997  | 0.29179  |
| O         | 1.13252  | 0.51810  | 0.80434  |
| O         | -0.31806 | 1.06986  | -0.57111 |
| H         | 1.03967  | -0.45441 | -1.05108 |
| H         | -1.12949 | -1.61699 | -0.56777 |
| H         | 0.11242  | -2.08832 | 0.61142  |
| H         | -1.14397 | -0.90490 | 1.06996  |
| H         | 0.01931  | 2.12896  | 1.06125  |

|          |          |          |          |
|----------|----------|----------|----------|
| val+03_6 |          |          |          |
| C        | 1.36848  | -0.08898 | -0.20078 |
| C        | -0.10452 | 0.05171  | 0.15582  |
| N        | 1.87459  | -0.88189 | -1.05226 |
| O        | -0.52403 | 1.39607  | 0.04666  |

Supplementary Material (ESI) for PCCP  
This journal is © the Owner Societies 2011

|           |          |          |          |
|-----------|----------|----------|----------|
| O         | -0.82849 | -0.81096 | -0.68611 |
| H         | 2.02441  | 0.60254  | 0.33811  |
| H         | -0.26028 | -0.19244 | 1.21624  |
| H         | 1.12534  | -1.45537 | -1.46213 |
| H         | -0.34228 | 1.67792  | -0.86667 |
| H         | -1.76402 | -0.73981 | -0.43987 |
| val+03_70 |          |          |          |
| C         | 0.96588  | 0.27021  | -0.10959 |
| C         | -1.40548 | -0.29167 | 0.16398  |
| N         | 0.00004  | -0.69619 | 0.15007  |
| O         | 0.69174  | 1.41684  | -0.89328 |
| O         | 0.91204  | 1.45893  | 0.60655  |
| H         | 1.96035  | -0.15444 | -0.26125 |
| H         | -1.50533 | 0.58800  | 0.80214  |
| H         | -1.99936 | -1.10225 | 0.59468  |
| H         | -1.79835 | -0.04465 | -0.83143 |
| H         | 0.17747  | -1.55967 | -0.34997 |
| val+03_71 |          |          |          |
| C         | 0.70139  | 0.45676  | 0.09427  |
| C         | -1.04828 | -1.09089 | -0.17172 |
| N         | 0.50881  | 1.88650  | 0.09796  |
| O         | 0.00111  | -0.34130 | -0.78045 |
| O         | 1.72463  | 1.16894  | -0.47527 |
| H         | 0.88467  | -0.00171 | 1.07110  |
| H         | -1.85650 | -0.44001 | 0.18770  |
| H         | -1.43825 | -1.75557 | -0.94413 |
| H         | -0.67371 | -1.69366 | 0.66707  |
| H         | -0.02747 | 2.08334  | -0.75862 |
| val+03_72 |          |          |          |
| C         | 0.43606  | 0.03803  | -0.14505 |
| C         | -0.45052 | 1.28901  | -0.08342 |
| N         | -0.02746 | -1.23037 | -0.55968 |
| O         | 1.18533  | 0.70040  | -1.21341 |
| O         | 0.51627  | 1.99606  | -0.88071 |
| H         | 1.06701  | -0.09002 | 0.74394  |
| H         | -1.40973 | 1.16859  | -0.60933 |
| H         | -0.60966 | 1.76514  | 0.89014  |
| H         | -0.17301 | -1.89027 | 0.19442  |
| H         | -0.82770 | -1.19677 | -1.18301 |
| val+03_73 |          |          |          |
| C         | 0.85581  | 0.64236  | -0.39252 |
| C         | 0.01659  | -0.24435 | 0.50098  |
| N         | -0.88813 | -1.13544 | -0.22279 |
| O         | 0.23422  | 1.77721  | -0.92300 |
| O         | 1.32381  | 1.85422  | 0.11497  |
| H         | 1.53853  | 0.13398  | -1.08353 |
| H         | -0.56635 | 0.40642  | 1.16023  |
| H         | 0.67901  | -0.85059 | 1.13166  |
| H         | -0.37004 | -1.77077 | -0.82734 |
| H         | -1.50785 | -0.59265 | -0.82187 |
| val+03_74 |          |          |          |
| C         | 0.87916  | 0.27254  | -0.08738 |
| C         | 0.63655  | 1.72176  | -0.08494 |
| N         | -0.66878 | -1.38135 | -0.48986 |
| O         | 1.56753  | 1.07432  | 0.82232  |
| O         | -0.02991 | -0.58830 | 0.53808  |
| H         | 1.45658  | -0.21580 | -0.87341 |
| H         | -0.26876 | 2.09630  | 0.39010  |
| H         | 1.09478  | 2.37083  | -0.83120 |
| H         | -0.62536 | -2.32371 | -0.09831 |
| H         | -1.65150 | -1.10559 | -0.42609 |
| val+03_75 |          |          |          |
| C         | 0.44974  | -0.42892 | 0.11002  |
| C         | 0.41946  | 1.53565  | -0.15043 |
| N         | -0.52019 | -1.42916 | -0.03270 |
| O         | 0.70698  | 0.45068  | -1.02429 |
| O         | 0.01053  | 0.67273  | 0.91068  |
| H         | 1.38475  | -0.87883 | 0.47287  |
| H         | -0.38561 | 2.19270  | -0.50931 |
| H         | 1.31234  | 2.12597  | 0.10580  |
| H         | -0.15670 | -2.27430 | -0.46152 |



Supplementary Material (ESI) for PCCP  
This journal is © the Owner Societies 2011

|           |          |          |          |
|-----------|----------|----------|----------|
| H         | -1.33689 | -1.09501 | -0.53753 |
| val+03_77 |          |          |          |
| C         | -0.88400 | -0.00087 | -0.07180 |
| C         | 0.34454  | -0.86227 | 0.31507  |
| N         | 0.93304  | 1.33905  | 0.25933  |
| O         | -0.48781 | 1.33372  | 0.27299  |
| O         | 1.27656  | 0.09063  | 0.84323  |
| H         | -1.10777 | -0.07773 | -1.14508 |
| H         | -1.78388 | -0.23146 | 0.50324  |
| H         | 0.76585  | -1.37790 | -0.55945 |
| H         | 0.14303  | -1.59137 | 1.10327  |
| H         | 1.17796  | 1.22800  | -0.74059 |
| val+03_78 |          |          |          |
| C         | -0.32189 | 1.15827  | -0.52345 |
| C         | 0.37679  | -0.97230 | -0.26692 |
| N         | -0.84088 | -0.18365 | -0.29452 |
| O         | 1.10772  | 1.12551  | -0.24045 |
| O         | 1.32984  | -0.16227 | 0.41684  |
| H         | -0.40492 | 1.45757  | -1.57381 |
| H         | -0.83203 | 1.88562  | 0.11837  |
| H         | 0.71665  | -1.18106 | -1.28878 |
| H         | 0.26230  | -1.89475 | 0.30706  |
| H         | -1.24346 | -0.20965 | 0.64085  |
| val+03_79 |          |          |          |
| C         | 0.15336  | -1.04901 | -0.11229 |
| C         | 0.91188  | 1.09175  | -0.07814 |
| N         | -0.94712 | -0.07634 | 0.03237  |
| O         | 1.26606  | -0.24086 | -0.44638 |
| O         | -0.22395 | 0.98537  | 0.73954  |
| H         | 0.36246  | -1.61270 | 0.81190  |
| H         | -0.07194 | -1.73650 | -0.93396 |
| H         | 0.70296  | 1.67134  | -0.98896 |
| H         | 1.70675  | 1.55298  | 0.51572  |
| H         | -1.60167 | -0.39122 | 0.75140  |
| val+03_7  |          |          |          |
| C         | 0.65386  | 0.52720  | -0.13436 |
| C         | -0.81749 | 0.52236  | -0.46798 |
| N         | 1.36734  | -0.45816 | 0.25505  |
| O         | -1.36757 | 1.83258  | -0.44081 |
| O         | 0.60099  | -1.64107 | 0.32916  |
| H         | 1.18969  | 1.47015  | -0.23694 |
| H         | -1.34846 | -0.17156 | 0.19828  |
| H         | -0.96312 | 0.15328  | -1.49045 |
| H         | -1.37809 | 2.12680  | 0.48304  |
| H         | 1.24556  | -2.27998 | 0.67090  |
| val+03_80 |          |          |          |
| C         | -0.13223 | -0.12742 | 0.37561  |
| C         | 0.14749  | -1.42074 | -0.38535 |
| N         | -0.38743 | 0.95949  | -0.59397 |
| O         | -0.04950 | 2.21071  | 0.01629  |
| O         | 0.86653  | 1.57085  | -0.92991 |
| H         | -1.05617 | -0.20737 | 0.96093  |
| H         | 0.69161  | 0.15789  | 1.03742  |
| H         | -0.67089 | -1.65937 | -1.07187 |
| H         | 1.07366  | -1.34028 | -0.96325 |
| H         | 0.25712  | -2.24937 | 0.32119  |
| val+03_81 |          |          |          |
| C         | -0.64890 | 1.06734  | 0.12273  |
| C         | 0.29469  | -1.18290 | 0.17869  |
| N         | 0.00712  | 0.03798  | 0.93754  |
| O         | 0.60674  | 1.63701  | -0.28886 |
| O         | 1.21058  | 0.89050  | 0.85801  |
| H         | -1.24842 | 0.70410  | -0.72076 |
| H         | -1.21959 | 1.76324  | 0.74884  |
| H         | -0.63372 | -1.76334 | 0.13446  |
| H         | 0.65979  | -0.98163 | -0.83792 |
| H         | 1.03912  | -1.76189 | 0.72987  |
| val+03_82 |          |          |          |
| C         | 1.05488  | -1.39239 | 0.24550  |
| C         | -1.05670 | 1.39021  | -0.09710 |

Supplementary Material (ESI) for PCCP  
This journal is © the Owner Societies 2011

|   |          |          |          |
|---|----------|----------|----------|
| N | 0.27882  | -0.44034 | -0.50081 |
| O | 1.66481  | -0.14894 | 0.05126  |
| O | -0.66146 | 0.10485  | 0.38536  |
| H | 1.44859  | -2.23550 | -0.32559 |
| H | 0.71309  | -1.61656 | 1.25696  |
| H | -0.23227 | 2.10644  | -0.00695 |
| H | -1.38495 | 1.32919  | -1.14025 |
| H | -1.88751 | 1.69604  | 0.54232  |

val+03\_83

|   |          |          |          |
|---|----------|----------|----------|
| C | -0.12577 | 1.39108  | 0.04499  |
| C | -0.02552 | -1.67250 | 0.13658  |
| N | 0.49489  | -0.44733 | -0.45803 |
| O | -0.66842 | 0.39744  | -0.81699 |
| O | 0.79278  | 0.48897  | 0.65109  |
| H | -0.85895 | 1.80913  | 0.74860  |
| H | 0.38370  | 2.19260  | -0.51216 |
| H | -0.79453 | -1.47352 | 0.89043  |
| H | 0.82620  | -2.19696 | 0.58087  |
| H | -0.43167 | -2.27541 | -0.68158 |

val+03\_84

|   |          |          |          |
|---|----------|----------|----------|
| C | 0.03977  | 0.18052  | 0.20883  |
| C | -1.25624 | -0.55189 | -0.03852 |
| N | 1.18702  | -0.63059 | 0.25397  |
| O | -0.04395 | 1.31342  | 1.05856  |
| O | 0.21635  | 1.40378  | -0.43093 |
| H | -2.06890 | 0.17288  | -0.10368 |
| H | -1.19518 | -1.12139 | -0.97064 |
| H | -1.46807 | -1.24924 | 0.78016  |
| H | 1.99521  | -0.10126 | 0.56870  |
| H | 1.06208  | -1.46043 | 0.82505  |

val+03\_8

|   |          |          |          |
|---|----------|----------|----------|
| C | 0.45693  | -0.29980 | -0.04082 |
| C | -1.84206 | -0.42105 | -0.24106 |
| N | -0.51553 | -0.48706 | -0.82301 |
| O | 1.72927  | -0.35359 | -0.50074 |
| O | -2.68361 | 0.44411  | -0.97002 |
| H | 0.36187  | -0.09067 | 1.03759  |
| H | -1.80876 | -0.13049 | 0.83006  |
| H | -2.30916 | -1.40926 | -0.30787 |
| H | 2.33728  | -0.16813 | 0.23085  |
| H | -2.19353 | 1.27075  | -1.10439 |

val+03\_9

|   |          |          |          |
|---|----------|----------|----------|
| C | -0.63494 | -0.81942 | 0.07634  |
| C | 1.57464  | -0.21252 | -0.35992 |
| N | 0.64150  | -1.04320 | -0.57563 |
| O | -0.84020 | 0.45089  | 0.65910  |
| O | -1.60413 | -1.07521 | -0.90600 |
| H | -0.70071 | -1.52198 | 0.91813  |
| H | 1.47137  | 0.67059  | 0.28161  |
| H | 2.54426  | -0.38257 | -0.83127 |
| H | -0.92916 | 1.07544  | -0.08293 |
| H | -2.46614 | -1.00431 | -0.46492 |

val+05\_100

|   |          |          |          |
|---|----------|----------|----------|
| C | 1.14518  | -0.47921 | 0.63387  |
| C | -0.37819 | 1.13756  | -0.08920 |
| N | -1.65540 | 0.56795  | -0.34416 |
| O | 0.75180  | 0.24808  | -0.39704 |
| O | 2.12961  | -1.25395 | 0.15169  |
| H | -0.29455 | 1.41262  | 0.96331  |
| H | -0.21504 | 2.00447  | -0.73137 |
| H | -1.81135 | -0.24149 | 0.25251  |
| H | -1.74297 | 0.26899  | -1.31246 |
| H | 2.43359  | -1.78361 | 0.90484  |

val+05\_103

|   |          |          |          |
|---|----------|----------|----------|
| C | 0.22520  | 0.31889  | -0.21820 |
| C | -1.25347 | 0.26605  | -0.10457 |
| N | 1.01759  | -0.72279 | -0.21135 |
| O | 2.31719  | -0.56540 | -0.31740 |
| O | 0.85189  | 1.48551  | -0.33820 |
| H | -1.59244 | 0.82631  | 0.77476  |
| H | -1.72376 | 0.71956  | -0.98496 |

Supplementary Material (ESI) for PCCP  
This journal is © the Owner Societies 2011

|   |          |          |          |
|---|----------|----------|----------|
| H | -1.60077 | -0.76811 | -0.01593 |
| H | 0.63912  | -1.66746 | -0.12361 |
| H | 1.80984  | 1.17994  | -0.38985 |

|            |          |          |          |
|------------|----------|----------|----------|
| val+05_104 |          |          |          |
| C          | 0.22338  | 0.87738  | -0.17132 |
| C          | -1.26990 | 0.92419  | -0.17617 |
| N          | 0.89812  | -0.23234 | -0.27620 |
| O          | 2.12877  | -0.43434 | -0.28837 |
| O          | 0.08702  | -1.39885 | -0.39626 |
| H          | 0.84976  | 1.75414  | -0.07996 |
| H          | -1.59990 | 1.96305  | -0.09627 |
| H          | -1.68872 | 0.49959  | -1.09667 |
| H          | -1.69963 | 0.36192  | 0.66218  |
| H          | 0.78771  | -2.07715 | -0.46105 |

|            |          |          |          |
|------------|----------|----------|----------|
| val+05_105 |          |          |          |
| C          | 0.63636  | -0.48769 | -0.24882 |
| C          | -0.97320 | 1.21415  | 0.27250  |
| N          | 0.01502  | 0.59493  | -0.63147 |
| O          | 0.19170  | 1.18369  | -1.75442 |
| O          | 1.53816  | -1.04469 | -1.08906 |
| H          | 0.42962  | -0.92579 | 0.71875  |
| H          | -0.64228 | 2.23710  | 0.46301  |
| H          | -1.92697 | 1.24092  | -0.25844 |
| H          | -1.07146 | 0.66154  | 1.21062  |
| H          | 1.91205  | -1.82816 | -0.66108 |

|            |          |          |          |
|------------|----------|----------|----------|
| val+05_106 |          |          |          |
| C          | 2.12962  | -1.16358 | 0.46216  |
| C          | -0.85900 | 0.02065  | -0.24326 |
| N          | -1.06313 | -1.36284 | 0.11422  |
| O          | 2.37478  | -1.55462 | 1.50309  |
| O          | -0.28761 | 0.65017  | 0.89480  |
| H          | -0.17219 | 0.04087  | -1.10279 |
| H          | -1.78365 | 0.56042  | -0.53208 |
| H          | -1.83752 | -1.45456 | 0.76811  |
| H          | -1.27328 | -1.92014 | -0.70940 |
| H          | -0.30512 | 1.60753  | 0.74025  |

|            |          |          |          |
|------------|----------|----------|----------|
| val+05_107 |          |          |          |
| C          | 2.08606  | -1.37127 | -1.15766 |
| C          | -0.65894 | 0.97958  | 0.46507  |
| N          | -0.29865 | -0.43586 | 0.40875  |
| O          | 1.33141  | -1.85139 | -1.86793 |
| O          | -1.27628 | -1.09814 | -0.41748 |
| H          | -0.00944 | 1.46152  | 1.20489  |
| H          | -1.71068 | 1.15011  | 0.73707  |
| H          | -0.47221 | 1.43395  | -0.51220 |
| H          | -0.46007 | -0.84597 | 1.32965  |
| H          | -0.72670 | -1.48543 | -1.12036 |

|            |          |          |          |
|------------|----------|----------|----------|
| val+05_108 |          |          |          |
| C          | 0.88886  | -1.27894 | -0.32623 |
| C          | -1.16360 | -0.12295 | 0.36310  |
| N          | 0.10088  | -0.25534 | -0.46703 |
| O          | 0.24143  | 0.69780  | -1.30110 |
| O          | -1.35149 | 1.20999  | 0.65745  |
| H          | 0.66222  | -2.01218 | 0.43530  |
| H          | 1.74486  | -1.36056 | -0.98223 |
| H          | -1.95822 | -0.55111 | -0.26666 |
| H          | -1.05292 | -0.70143 | 1.28269  |
| H          | -1.03901 | 1.66972  | -0.15408 |

|            |          |          |          |
|------------|----------|----------|----------|
| val+05_109 |          |          |          |
| C          | 0.43821  | -0.09627 | -0.16470 |
| C          | -0.89369 | 0.07558  | 0.49357  |
| N          | 0.85139  | -1.26593 | -0.58504 |
| O          | 0.27455  | -2.39089 | -0.48047 |
| O          | -1.55066 | 1.25779  | 0.04289  |
| H          | 1.09578  | 0.74726  | -0.34215 |
| H          | -1.48644 | -0.83343 | 0.32907  |
| H          | -0.77948 | 0.20381  | 1.57684  |
| H          | 1.76833  | -1.27138 | -1.06103 |
| H          | -1.77229 | 1.12486  | -0.89218 |

val+05\_10

Supplementary Material (ESI) for PCCP  
This journal is © the Owner Societies 2011

|   |          |          |          |
|---|----------|----------|----------|
| C | -0.86532 | 1.09402  | -0.02538 |
| C | -2.22117 | 0.55499  | 0.18967  |
| N | -1.11393 | -0.08339 | -0.63480 |
| O | 0.02883  | 1.86292  | 0.25036  |
| O | 1.62273  | -0.62838 | 0.14241  |
| H | -2.44493 | 0.15804  | 1.18094  |
| H | -3.08700 | 0.85127  | -0.39772 |
| H | 2.14456  | -0.69627 | -0.67133 |
| H | -0.56605 | -0.90214 | -0.36190 |
| H | 1.46907  | 0.33074  | 0.24106  |

val+05\_110

|   |          |          |          |
|---|----------|----------|----------|
| C | 1.40398  | -1.26195 | -0.12813 |
| C | 0.48037  | -0.35544 | 0.14385  |
| N | -0.85625 | -0.42794 | -0.40059 |
| O | 2.21425  | -2.06608 | -0.39837 |
| O | -1.28576 | 2.04920  | 1.05526  |
| H | 0.71367  | 0.46866  | 0.81133  |
| H | -0.86585 | -0.48524 | -1.41599 |
| H | -1.40064 | 1.25924  | 0.48484  |
| H | -1.38860 | -1.21293 | -0.03087 |
| H | -1.07109 | 2.75467  | 0.42718  |

val+05\_112

|   |          |          |          |
|---|----------|----------|----------|
| C | 0.43239  | -0.04370 | 0.19194  |
| C | -0.16954 | 1.22157  | -0.19323 |
| N | -0.36812 | -1.29278 | 0.06242  |
| O | -0.97463 | -1.59251 | 1.22609  |
| O | 0.84284  | 0.57278  | -1.00998 |
| H | 1.14464  | -0.15056 | 1.00560  |
| H | -1.17344 | 1.23283  | -0.61768 |
| H | 0.14775  | 2.14140  | 0.29383  |
| H | 0.28352  | -2.03588 | -0.27528 |
| H | -1.01710 | -1.14725 | -0.74382 |

val+05\_113

|   |          |          |          |
|---|----------|----------|----------|
| C | 0.00672  | -0.61350 | 0.23157  |
| C | 0.18172  | -2.08528 | -0.02214 |
| N | -0.48720 | 3.27239  | 0.22909  |
| O | -0.89018 | 4.05362  | -0.60812 |
| O | -0.21281 | 0.20841  | -0.63525 |
| H | 0.09137  | -0.30054 | 1.29468  |
| H | -0.56629 | -2.65033 | 0.54947  |
| H | 1.16571  | -2.40876 | 0.34209  |
| H | 0.08492  | -2.30610 | -1.08725 |
| H | -0.44187 | 2.30681  | -0.20916 |

val+05\_114

|   |          |          |          |
|---|----------|----------|----------|
| C | 0.01553  | -0.69142 | -0.08719 |
| C | 1.04339  | 0.42624  | 0.04665  |
| N | -1.12943 | 0.30259  | -0.04918 |
| O | -2.07745 | 0.21613  | -0.84201 |
| O | 0.12252  | 1.45391  | -0.30259 |
| H | -0.03540 | -1.12728 | -1.08470 |
| H | -0.08052 | -1.46485 | 0.68185  |
| H | 1.88960  | 0.36251  | -0.64882 |
| H | 1.44138  | 0.52909  | 1.06956  |
| H | -1.36211 | 0.63206  | 0.90294  |

val+05\_115

|   |          |          |          |
|---|----------|----------|----------|
| C | -0.99421 | 0.38877  | 0.18136  |
| C | 0.99996  | 0.44166  | -0.24159 |
| N | 0.02868  | -0.75267 | -0.05469 |
| O | 0.24769  | -1.65340 | 0.86453  |
| O | -0.09193 | 1.34852  | -0.36037 |
| H | -1.93986 | 0.32215  | -0.36411 |
| H | -1.12777 | 0.44869  | 1.26589  |
| H | 1.64524  | 0.41729  | -1.12437 |
| H | 1.55861  | 0.51992  | 0.69617  |
| H | -0.16181 | -1.14743 | -1.00182 |

val+05\_116

|   |          |          |          |
|---|----------|----------|----------|
| C | -0.49569 | 1.93646  | 0.21295  |
| C | -0.10213 | -1.51032 | 0.11938  |
| N | 0.52642  | -0.54351 | -0.81188 |
| O | 1.23559  | -1.05478 | -1.64840 |
| O | -1.14958 | 1.49081  | 1.12772  |

Supplementary Material (ESI) for PCCP  
 This journal is © the Owner Societies 2011

|   |          |          |          |
|---|----------|----------|----------|
| H | -0.91844 | 2.09597  | -0.79949 |
| H | 0.56569  | 2.23510  | 0.32904  |
| H | 0.19113  | -1.21396 | 1.13294  |
| H | 0.19174  | -2.53704 | -0.11469 |
| H | -1.18582 | -1.36193 | 0.04943  |

|            |          |          |          |
|------------|----------|----------|----------|
| val+05_117 |          |          |          |
| C          | -0.44582 | -0.07779 | 0.28948  |
| C          | 0.66596  | 0.85330  | -0.21166 |
| N          | -0.08143 | -1.38927 | 0.35731  |
| O          | -1.54726 | 0.35581  | 0.59135  |
| O          | 1.81625  | 0.18264  | -0.71816 |
| H          | 0.22404  | 1.54440  | -0.94028 |
| H          | 1.00509  | 1.45312  | 0.63936  |
| H          | -0.71089 | -2.03923 | 0.80652  |
| H          | 0.89407  | -1.63058 | 0.25131  |
| H          | 1.60668  | -0.12429 | -1.61384 |

|            |          |          |          |
|------------|----------|----------|----------|
| val+05_118 |          |          |          |
| C          | 0.50232  | 0.79255  | 0.25601  |
| C          | -0.60469 | -0.24574 | -0.00165 |
| N          | -0.02739 | -1.58823 | -0.16819 |
| O          | 0.30499  | 1.98287  | 0.21376  |
| O          | 1.68841  | 0.24300  | 0.55820  |
| H          | -1.25635 | -0.23853 | 0.87889  |
| H          | -1.20745 | 0.10343  | -0.84800 |
| H          | -0.62955 | -2.30952 | 0.21820  |
| H          | 1.53810  | -0.73418 | 0.49585  |
| H          | 0.11321  | -1.80796 | -1.15146 |

|           |          |          |          |
|-----------|----------|----------|----------|
| val+05_11 |          |          |          |
| C         | 0.47162  | 1.02701  | 0.11813  |
| C         | -0.89009 | 1.42049  | -0.08162 |
| N         | 1.36243  | 0.13886  | 0.14227  |
| O         | 0.26561  | 2.34392  | 0.28771  |
| O         | -0.73704 | -1.68092 | -0.75575 |
| H         | -1.62295 | 1.29821  | 0.71156  |
| H         | -1.27527 | 1.57598  | -1.08566 |
| H         | 0.16542  | -1.35460 | -0.57167 |
| H         | 2.28241  | 0.52506  | 0.37009  |
| H         | -0.92065 | -2.26431 | -0.00476 |

|            |          |          |          |
|------------|----------|----------|----------|
| val+05_121 |          |          |          |
| C          | -0.27627 | 1.33236  | -0.14361 |
| C          | -0.79376 | 0.45463  | 0.98570  |
| N          | 0.72028  | -1.18513 | -0.62557 |
| O          | -0.93752 | 1.57916  | -1.12765 |
| O          | -0.29984 | 0.46883  | 2.09090  |
| H          | 0.72399  | 1.77335  | 0.04922  |
| H          | -1.69649 | -0.13505 | 0.72352  |
| H          | 0.61409  | -2.06259 | -0.11907 |
| H          | 1.72078  | -1.03500 | -0.74437 |
| H          | 0.32823  | -1.32335 | -1.55557 |

|            |          |          |          |
|------------|----------|----------|----------|
| val+05_122 |          |          |          |
| C          | 0.27967  | -1.71025 | -0.20243 |
| C          | -0.77895 | 2.37960  | -0.15202 |
| N          | 0.97271  | -0.57432 | 0.08218  |
| O          | 0.75267  | -2.72613 | -0.67939 |
| O          | -0.47553 | 1.92510  | 0.92913  |
| H          | -0.79921 | -1.60476 | 0.03359  |
| H          | -0.50789 | 1.87323  | -1.09806 |
| H          | -1.34341 | 3.32678  | -0.24532 |
| H          | 0.54437  | 0.19657  | 0.58720  |
| H          | 1.97967  | -0.59893 | -0.01299 |

|            |          |          |          |
|------------|----------|----------|----------|
| val+05_123 |          |          |          |
| C          | 0.30617  | 1.23009  | 0.07486  |
| C          | -0.18496 | 0.37750  | -1.05475 |
| N          | -1.19408 | -0.46801 | -0.92534 |
| O          | -0.12065 | 2.22138  | 0.62401  |
| O          | 1.27251  | 0.40611  | 0.22462  |
| H          | 0.37366  | 0.34812  | -1.98288 |
| H          | 0.64288  | -2.03773 | 2.34609  |
| H          | -1.77420 | -0.43616 | -0.09501 |
| H          | 0.84688  | -1.46844 | 1.91189  |
| H          | -1.29211 | -1.28526 | -1.51540 |

| val+05_124 |          |          |          |
|------------|----------|----------|----------|
| C          | 0.18427  | 0.44469  | -0.88659 |
| C          | -0.23094 | 1.27534  | 0.09573  |
| N          | 0.28801  | -1.71903 | 0.49623  |
| O          | -0.07322 | -2.82448 | 0.08817  |
| O          | 1.02158  | -0.57476 | -0.71215 |
| H          | -0.21548 | 0.55260  | -1.90175 |
| H          | -0.96517 | 2.04853  | -0.10345 |
| H          | 0.19245  | 1.23249  | 1.09681  |
| H          | 1.14678  | -1.66731 | 1.06783  |
| H          | -0.43068 | -1.00587 | 0.74248  |

| val+05_125 |          |          |          |
|------------|----------|----------|----------|
| C          | -1.05381 | 1.55421  | 0.34962  |
| C          | 0.77949  | -1.58273 | -0.33983 |
| N          | -0.12591 | -1.70713 | 0.54575  |
| O          | -0.15249 | 1.44602  | -0.45873 |
| O          | -1.54601 | 0.59618  | 1.12232  |
| H          | -1.58227 | 2.50313  | 0.53502  |
| H          | 0.91579  | -0.59822 | -0.78878 |
| H          | 1.42456  | -2.40270 | -0.67376 |
| H          | -1.05430 | -0.26770 | 0.94360  |
| H          | -0.19293 | -2.65778 | 0.91899  |

| val+05_127 |          |          |          |
|------------|----------|----------|----------|
| C          | 0.58272  | 0.37437  | -0.21094 |
| C          | -1.70587 | -0.12161 | -0.13790 |
| N          | 1.74758  | -0.21273 | -0.19220 |
| O          | 2.85587  | 0.26032  | 0.22557  |
| O          | -0.45164 | -0.26226 | -0.81228 |
| H          | 0.48244  | 1.37753  | 0.19057  |
| H          | -1.97108 | 0.93739  | -0.02355 |
| H          | -2.44775 | -0.61472 | -0.76781 |
| H          | -1.67785 | -0.59865 | 0.84922  |
| H          | 1.74448  | -1.16764 | -0.59169 |

| val+05_128 |          |          |          |
|------------|----------|----------|----------|
| C          | 1.55331  | -2.12600 | 0.00636  |
| C          | -1.61829 | 1.20528  | 0.29045  |
| N          | 0.43198  | -1.72678 | -0.22509 |
| O          | 2.58625  | -2.64604 | 0.23835  |
| O          | -0.63892 | 0.87016  | -0.69673 |
| H          | -2.05556 | 2.19321  | 0.09812  |
| H          | -2.41993 | 0.45740  | 0.34802  |
| H          | -1.09547 | 1.23377  | 1.24842  |
| H          | -1.07865 | 0.82669  | -1.55989 |
| H          | 0.12319  | -0.76248 | -0.39332 |

| val+05_129 |          |          |          |
|------------|----------|----------|----------|
| C          | 1.95857  | -0.43490 | 0.11487  |
| C          | -1.56808 | -0.29327 | 0.18501  |
| N          | 0.75340  | -0.16793 | -0.29947 |
| O          | 0.37179  | 0.37301  | -1.34321 |
| O          | -0.25015 | -0.59238 | 0.64867  |
| H          | 2.07812  | -0.91868 | 1.07059  |
| H          | 2.77227  | -0.15090 | -0.53383 |
| H          | -1.71663 | 0.78165  | 0.05171  |
| H          | -2.20331 | -0.66619 | 0.99111  |
| H          | -1.79688 | -0.81301 | -0.74923 |

| val+05_12 |          |          |          |
|-----------|----------|----------|----------|
| C         | 0.40919  | 0.85547  | 0.10780  |
| C         | 0.58091  | -0.66160 | 0.19080  |
| N         | -0.50659 | 1.27470  | -0.80091 |
| O         | 1.07318  | 1.59334  | 0.82171  |
| O         | -0.31266 | -1.31833 | -0.70149 |
| H         | 0.40585  | -0.94933 | 1.23715  |
| H         | 1.63268  | -0.88021 | -0.04320 |
| H         | -1.02851 | 0.60414  | -1.34570 |
| H         | -0.67886 | 2.26416  | -0.90041 |
| H         | -0.15628 | -2.27215 | -0.64764 |

| val+05_131 |          |          |         |
|------------|----------|----------|---------|
| C          | 1.53132  | -0.28499 | 0.37488 |
| C          | -0.63062 | 2.32058  | 0.52717 |
| N          | -1.26561 | -0.79540 | 0.00008 |

Supplementary Material (ESI) for PCCP  
This journal is © the Owner Societies 2011

|   |          |          |          |
|---|----------|----------|----------|
| O | 1.96821  | -1.40721 | 0.26026  |
| O | -1.73766 | 2.57796  | 0.46049  |
| H | 1.22579  | 0.14298  | 1.35015  |
| H | 1.42281  | 0.40705  | -0.48356 |
| H | -1.97477 | -0.89147 | 0.72575  |
| H | -1.76967 | -0.68458 | -0.87877 |
| H | -0.78451 | -1.69202 | -0.05456 |

|            |          |          |          |
|------------|----------|----------|----------|
| val+05_132 |          |          |          |
| C          | 1.24215  | 1.92149  | -0.19701 |
| C          | 1.05935  | -1.54750 | -0.70517 |
| N          | -1.69182 | 0.57788  | 0.38046  |
| O          | 0.78225  | 2.92569  | 0.07921  |
| O          | 0.86260  | -2.73138 | -0.86302 |
| H          | 0.26790  | -0.84464 | -0.37811 |
| H          | -1.93287 | 1.55188  | 0.55973  |
| H          | -2.34735 | 0.24735  | -0.32652 |
| H          | -1.91738 | 0.06691  | 1.23299  |
| H          | 2.05727  | -1.08958 | -0.88107 |

|            |          |          |          |
|------------|----------|----------|----------|
| val+05_133 |          |          |          |
| C          | 1.08774  | -0.63307 | 0.45861  |
| C          | -0.65986 | 1.02787  | -0.25693 |
| N          | -0.30946 | -0.39078 | 0.00310  |
| O          | 1.82865  | 0.25612  | 0.77717  |
| O          | -0.84797 | -0.88584 | 1.17368  |
| H          | 1.26354  | -1.71186 | 0.52424  |
| H          | -0.20544 | 1.36260  | -1.19449 |
| H          | -1.74802 | 1.07704  | -0.30173 |
| H          | -0.28507 | 1.60757  | 0.58361  |
| H          | -0.56390 | -0.96344 | -0.82005 |

|            |          |          |          |
|------------|----------|----------|----------|
| val+05_134 |          |          |          |
| C          | -0.10887 | -0.77528 | 0.12169  |
| C          | 1.37543  | -0.48591 | 0.08963  |
| N          | -0.95099 | 0.33614  | 0.06368  |
| O          | -0.59657 | -1.88432 | 0.25173  |
| O          | -0.44490 | 1.48632  | -0.58793 |
| H          | 1.91048  | -1.41420 | 0.29357  |
| H          | 1.64862  | 0.27222  | 0.83103  |
| H          | 1.66574  | -0.09728 | -0.89195 |
| H          | -1.88200 | 0.11383  | -0.28115 |
| H          | -0.44353 | 2.16428  | 0.10880  |

|            |          |          |          |
|------------|----------|----------|----------|
| val+05_135 |          |          |          |
| C          | -0.38343 | -0.29491 | 0.01418  |
| C          | 1.08287  | -0.67816 | -0.03030 |
| N          | -0.61467 | 1.20044  | -0.08961 |
| O          | -1.78655 | 1.56368  | -0.08734 |
| O          | 0.36198  | 1.93839  | -0.16466 |
| H          | -0.96469 | -0.71893 | -0.80863 |
| H          | -0.87399 | -0.58238 | 0.94803  |
| H          | 1.16474  | -1.76753 | 0.04933  |
| H          | 1.63726  | -0.22624 | 0.79564  |
| H          | 1.54818  | -0.36235 | -0.96725 |

|            |          |          |          |
|------------|----------|----------|----------|
| val+05_136 |          |          |          |
| C          | 1.02110  | -0.56814 | -0.07730 |
| C          | -0.48970 | -0.37708 | -0.08922 |
| N          | -0.74957 | 1.09299  | 0.06515  |
| O          | 1.75264  | 0.19493  | -0.66691 |
| O          | -0.51430 | 1.48484  | 1.33270  |
| H          | 1.41196  | -1.45700 | 0.45436  |
| H          | -0.98873 | -0.85475 | 0.75407  |
| H          | -0.89022 | -0.75901 | -1.04154 |
| H          | -1.71962 | 1.28781  | -0.26160 |
| H          | -0.11965 | 1.55461  | -0.62410 |

|            |          |          |          |
|------------|----------|----------|----------|
| val+05_137 |          |          |          |
| C          | 0.03830  | -0.05524 | 0.01281  |
| C          | 1.26058  | -0.45151 | -0.25101 |
| N          | -1.02612 | -1.08027 | -0.22950 |
| O          | -0.73491 | 1.05238  | 0.46209  |
| O          | -2.15069 | -0.63868 | -1.01971 |
| H          | 2.06035  | 0.26124  | -0.01821 |
| H          | -1.42921 | -1.46141 | 0.63709  |
| H          | -0.51402 | -1.80825 | -0.74277 |

Supplementary Material (ESI) for PCCP  
This journal is © the Owner Societies 2011

|            |          |          |          |
|------------|----------|----------|----------|
| H          | -0.13273 | 1.81143  | 0.46458  |
| H          | -2.14075 | 0.32042  | -0.80567 |
| val+05_139 |          |          |          |
| C          | 0.44137  | -1.22085 | -0.13483 |
| C          | 1.61541  | -1.39000 | 0.09410  |
| N          | -0.89637 | -1.02824 | -0.31895 |
| O          | -2.85759 | 0.44606  | 1.15111  |
| O          | -2.59303 | 1.28523  | -0.00984 |
| H          | 2.65507  | -1.54008 | 0.26851  |
| H          | -1.13895 | -0.13302 | -0.74749 |
| H          | -2.17373 | -0.24878 | 1.00102  |
| H          | -1.35188 | -1.78935 | -0.81729 |
| H          | -2.25630 | 2.08563  | 0.43044  |
| val+05_13  |          |          |          |
| C          | 0.02001  | -0.29982 | 0.29977  |
| C          | 0.98266  | 0.85876  | 0.11426  |
| N          | 0.46291  | -1.48390 | 0.22528  |
| O          | 2.28769  | 0.41686  | -0.12484 |
| O          | -1.28358 | 0.00611  | 0.53921  |
| H          | 0.61975  | 1.48056  | -0.72334 |
| H          | 0.94248  | 1.49138  | 1.01879  |
| H          | 2.23182  | -0.56058 | -0.10798 |
| H          | -0.26799 | -2.18397 | 0.36522  |
| H          | -1.40426 | 0.97050  | 0.55563  |
| val+05_141 |          |          |          |
| C          | -1.40275 | 0.32530  | -0.05475 |
| C          | -0.39856 | -0.55050 | 0.00326  |
| N          | -2.73432 | -0.15002 | 0.20486  |
| O          | 0.93985  | -0.34855 | -0.20956 |
| O          | 1.19585  | 1.03249  | -0.57179 |
| H          | -1.21230 | 1.36707  | -0.30830 |
| H          | -3.16926 | 0.40776  | 0.93910  |
| H          | -3.31856 | -0.02439 | -0.62159 |
| H          | -0.55379 | -1.59965 | 0.23975  |
| H          | 1.62593  | 1.33989  | 0.24792  |
| val+05_142 |          |          |          |
| C          | 0.24070  | 0.30453  | -1.12456 |
| C          | 1.24281  | 0.78656  | -0.65396 |
| N          | -2.62052 | -0.45920 | 0.35656  |
| O          | -0.79526 | -0.28799 | -1.67617 |
| O          | 2.25907  | 1.49968  | -0.16294 |
| H          | -2.19364 | 0.07313  | 1.11300  |
| H          | -1.50725 | -0.40342 | -0.97332 |
| H          | -3.51843 | -0.02422 | 0.15226  |
| H          | -2.81106 | -1.39305 | 0.71532  |
| H          | 2.97007  | 0.88939  | 0.09441  |
| val+05_143 |          |          |          |
| C          | 0.66815  | 0.86272  | 0.33196  |
| C          | 1.25641  | 0.19745  | 1.15666  |
| N          | -2.32360 | -0.39898 | 0.20766  |
| O          | -0.02150 | 1.61868  | -0.46779 |
| O          | -0.59827 | 0.78919  | -1.56160 |
| H          | 1.90730  | -0.34238 | 1.80371  |
| H          | -3.07856 | 0.15304  | 0.61103  |
| H          | -1.35812 | 0.37645  | -1.03897 |
| H          | -1.62860 | -0.54360 | 0.94089  |
| H          | -2.70842 | -1.31187 | -0.02876 |
| val+05_144 |          |          |          |
| C          | -0.44155 | 0.76885  | -0.13259 |
| C          | -1.39580 | -0.37907 | -0.21192 |
| N          | 0.80118  | 0.49425  | -0.08675 |
| O          | -2.73516 | 0.05249  | -0.37525 |
| O          | 1.45957  | -0.83049 | -0.17903 |
| H          | -1.30665 | -0.98653 | 0.71083  |
| H          | -1.13175 | -1.04548 | -1.04768 |
| H          | 1.55192  | 1.17430  | -0.06544 |
| H          | -2.71981 | 1.00907  | -0.20968 |
| H          | 1.09456  | -1.31739 | 0.58210  |
| val+05_145 |          |          |          |
| C          | 1.49854  | -0.31551 | -0.35562 |



Supplementary Material (ESI) for PCCP  
This journal is © the Owner Societies 2011

|   |          |          |          |
|---|----------|----------|----------|
| C | -0.88998 | 0.40447  | 0.33085  |
| N | 0.57142  | 0.43759  | 0.28709  |
| O | 1.00227  | -1.37785 | -0.99789 |
| O | -1.47198 | 1.51436  | -0.31255 |
| H | -1.24996 | -0.54753 | -0.08488 |
| H | -1.22677 | 0.45465  | 1.36907  |
| H | 0.96776  | 1.24769  | 0.74808  |
| H | 0.03026  | -1.51805 | -0.92225 |
| H | -1.16917 | 1.51788  | -1.23510 |

val+05\_146

|   |          |          |          |
|---|----------|----------|----------|
| C | -0.80115 | 0.25016  | -0.09306 |
| C | -1.66963 | -0.96468 | 0.05501  |
| N | 0.43064  | 0.10352  | 0.13996  |
| O | 1.38546  | 1.14247  | 0.04214  |
| O | 1.16922  | -1.02414 | 0.59981  |
| H | -2.28940 | -0.83150 | 0.95152  |
| H | -2.36722 | -1.01614 | -0.78816 |
| H | -1.13233 | -1.91728 | 0.14594  |
| H | 0.82549  | 1.85862  | -0.31930 |
| H | 1.98652  | -0.98904 | 0.06643  |

val+05\_147

|   |          |          |          |
|---|----------|----------|----------|
| C | 0.50118  | -0.92753 | 0.27021  |
| C | -1.17171 | 0.86104  | 0.21595  |
| N | 0.17455  | 0.34100  | 0.17079  |
| O | 1.87166  | -1.00561 | 0.18084  |
| O | 1.10671  | 1.41322  | 0.00146  |
| H | -1.27396 | 1.55837  | 1.05393  |
| H | -1.39913 | 1.38799  | -0.71652 |
| H | -1.84285 | 0.01242  | 0.34506  |
| H | 2.09709  | -1.94225 | 0.25571  |
| H | 1.95976  | 0.93575  | -0.01163 |

val+05\_148

|   |          |          |          |
|---|----------|----------|----------|
| C | 1.78892  | -1.14594 | 0.22814  |
| C | -0.34758 | -0.01730 | 0.01877  |
| N | 0.96004  | -0.42527 | -0.49314 |
| O | -0.35752 | 1.27908  | 0.54178  |
| O | -1.21567 | -0.13591 | -1.07962 |
| H | 2.69321  | -1.28112 | -0.40356 |
| H | -0.58333 | -0.68011 | 0.85361  |
| H | 1.10973  | -0.09331 | -1.45599 |
| H | -0.14093 | 1.89054  | -0.18377 |
| H | -2.08628 | 0.17674  | -0.78581 |

val+05\_149

|   |          |          |          |
|---|----------|----------|----------|
| C | 0.88116  | 1.25492  | -0.13956 |
| C | -1.20222 | -0.00105 | -0.20601 |
| N | 0.26875  | 0.14561  | -0.01812 |
| O | -1.72847 | 1.17307  | -0.71016 |
| O | 0.83155  | -1.09700 | 0.48677  |
| H | 1.94407  | 1.14012  | 0.10602  |
| H | -1.61029 | -0.27601 | 0.77705  |
| H | -1.36442 | -0.83902 | -0.89887 |
| H | -0.98908 | 1.82618  | -0.63106 |
| H | 0.94135  | -1.64752 | -0.31126 |

val+05\_14

|   |          |          |          |
|---|----------|----------|----------|
| C | -0.05677 | 0.66219  | -0.06714 |
| C | -2.03902 | 0.72978  | -0.11259 |
| N | -1.04487 | -0.18089 | 0.45264  |
| O | -0.96576 | 1.63138  | -0.48194 |
| O | 1.13408  | 0.64204  | -0.15489 |
| H | -2.57782 | 0.36191  | -0.99179 |
| H | -2.71422 | 1.18058  | 0.61869  |
| H | 2.52261  | -2.30675 | 0.56145  |
| H | -1.02781 | -1.18528 | 0.31736  |
| H | 2.27968  | -1.61865 | 0.41562  |

val+05\_150

|   |          |          |          |
|---|----------|----------|----------|
| C | 0.63981  | 0.37108  | -0.30700 |
| C | -0.65079 | -0.42302 | -0.24448 |
| N | 1.50257  | -0.08455 | 0.56277  |
| O | -1.75173 | 0.43005  | -0.45914 |
| O | -0.78807 | -1.11064 | 0.99483  |
| H | -0.62214 | -1.16092 | -1.06617 |

Supplementary Material (ESI) for PCCP  
This journal is © the Owner Societies 2011

|   |          |          |          |
|---|----------|----------|----------|
| H | 2.41588  | 0.34837  | 0.65294  |
| H | 1.29360  | -0.84384 | 1.22104  |
| H | -1.38583 | 1.32823  | -0.52591 |
| H | -1.67872 | -1.49306 | 1.01872  |

val+05\_151

|   |          |          |          |
|---|----------|----------|----------|
| C | -0.96286 | 0.45021  | 0.31145  |
| C | -1.94175 | -0.49820 | -0.28609 |
| N | 0.25557  | 0.42424  | 0.20944  |
| O | 1.29295  | -0.67906 | -0.64377 |
| O | 2.55785  | -0.20572 | -0.20088 |
| H | -2.42440 | 0.00205  | -1.13457 |
| H | -2.73378 | -0.72927 | 0.43283  |
| H | -1.47973 | -1.42718 | -0.64207 |
| H | 1.02500  | 1.00589  | 0.54295  |
| H | 2.77615  | -0.84307 | 0.50491  |

val+05\_152

|   |          |          |          |
|---|----------|----------|----------|
| C | 1.40671  | 0.82043  | -0.58515 |
| C | -1.01925 | 1.20469  | -0.10831 |
| N | 0.36838  | 1.60878  | -0.43769 |
| O | 1.59083  | -0.37477 | -0.53042 |
| O | 0.12755  | -1.48244 | -0.21685 |
| H | -1.34616 | 1.75744  | 0.77789  |
| H | -1.67831 | 1.43884  | -0.95035 |
| H | -1.00733 | 0.13020  | 0.08372  |
| H | 0.54953  | 2.59582  | -0.56196 |
| H | 0.64004  | -2.02629 | 0.40663  |

val+05\_153

|   |          |          |          |
|---|----------|----------|----------|
| C | 0.61073  | 1.36590  | -0.98261 |
| C | -1.23260 | -0.00661 | -0.06602 |
| N | 1.54305  | 0.55931  | -0.51078 |
| O | -0.67085 | 1.14383  | -0.76010 |
| O | 1.46090  | -0.76015 | 0.14838  |
| H | -0.92467 | -0.01374 | 0.98242  |
| H | -2.31324 | 0.13082  | -0.13341 |
| H | -0.93155 | -0.93794 | -0.54543 |
| H | 2.49181  | 0.70960  | -0.82505 |
| H | 1.60792  | -0.54652 | 1.08710  |

val+05\_154

|   |          |          |          |
|---|----------|----------|----------|
| C | 1.76962  | 0.13257  | 0.05755  |
| C | -1.49363 | -0.71022 | 0.32244  |
| N | 0.56850  | 0.40820  | 0.55385  |
| O | -0.65346 | 0.31238  | -0.22177 |
| O | 1.71214  | -0.40051 | -1.16056 |
| H | -0.99108 | -1.68417 | 0.32673  |
| H | -2.37106 | -0.74406 | -0.32922 |
| H | -1.81023 | -0.46052 | 1.34344  |
| H | 0.44993  | 0.99296  | 1.37117  |
| H | 0.78147  | -0.41114 | -1.48661 |

val+05\_155

|   |          |          |          |
|---|----------|----------|----------|
| C | 0.12197  | -1.39461 | -0.45545 |
| C | -1.16416 | -1.00910 | 0.21127  |
| N | 1.04766  | -0.48779 | -0.26705 |
| O | -1.22726 | 0.23394  | 0.95660  |
| O | -1.35068 | 1.31441  | -0.01926 |
| H | -1.97644 | -1.02682 | -0.52634 |
| H | -1.39148 | -1.76903 | 0.97241  |
| H | 0.90137  | 0.38182  | 0.25776  |
| H | 1.97555  | -0.61618 | -0.65540 |
| H | -2.23994 | 1.63955  | 0.20906  |

val+05\_156

|   |          |          |          |
|---|----------|----------|----------|
| C | 0.99681  | 0.24268  | -0.89382 |
| C | -1.10475 | -0.71687 | -0.04258 |
| N | 1.33667  | 0.31440  | 0.40001  |
| O | -0.28578 | -0.17161 | -1.08518 |
| O | -1.42611 | 0.19810  | 0.97694  |
| H | -1.99557 | -1.08684 | -0.56074 |
| H | -0.58200 | -1.54205 | 0.45117  |
| H | 2.27648  | 0.62617  | 0.59890  |
| H | 0.70191  | 0.24343  | 1.19592  |
| H | -1.89046 | 0.94698  | 0.56827  |

Supplementary Material (ESI) for PCCP  
This journal is © the Owner Societies 2011

val+05\_157  
C 0.87435 1.93342 0.92486  
C -0.90196 0.38329 0.20463  
N 0.45072 0.84160 0.47716  
O 1.47971 -0.27334 -0.01442  
O 1.12095 -1.54938 0.53199  
H 1.96920 1.95279 0.99946  
H -1.02725 0.24782 -0.87390  
H -1.58904 1.14379 0.57285  
H -1.07342 -0.56488 0.71687  
H 0.76664 -2.00012 -0.25740

val+05\_158  
C 0.54748 0.89859 -0.39258  
C -1.26530 -1.09822 -0.01855  
N 0.88771 -0.15941 0.19893  
O 0.04783 -1.25416 0.52467  
O 2.14592 -0.53537 0.74670  
H 1.43190 1.53615 -0.49812  
H -1.75665 -0.21431 0.39596  
H -1.77632 -2.01332 0.28844  
H -1.23431 -1.01258 -1.10875  
H 2.11153 -1.51166 0.74189

val+05\_159  
C 0.61968 -1.60998 -1.10945  
C -0.95805 -0.45243 0.31806  
N 0.38475 -0.91285 -0.02048  
O -0.99916 0.92501 0.60397  
O -0.73944 1.63877 -0.64028  
H 1.71277 -1.81218 -1.10605  
H -1.60271 -0.74099 -0.51598  
H -1.29444 -0.90556 1.25940  
H 1.08475 -0.60151 0.66503  
H -1.61055 2.05632 -0.77203

val+05\_15  
C 0.55653 0.34760 -0.15278  
C -0.80527 0.95961 0.08975  
N 0.57537 -1.02498 -0.40435  
O 1.60021 0.97475 -0.19914  
O -0.48085 -1.78903 0.14713  
H -0.69453 2.04441 0.11335  
H -1.21611 0.60757 1.04170  
H -1.51494 0.67415 -0.69372  
H 1.47254 -1.45690 -0.19546  
H -0.92045 -2.17061 -0.63149

val+05\_160  
C 1.53078 0.00042 -0.40783  
C -1.36303 -0.36030 0.09486  
N 0.93704 0.22451 0.67180  
O -0.57080 0.13314 1.10974  
O -1.60746 0.66210 -0.85630  
H 0.87843 -0.31666 -1.22985  
H -2.28860 -0.68813 0.59210  
H -0.88955 -1.23534 -0.39056  
H 1.33833 0.55600 1.54092  
H -2.06774 0.26585 -1.61358

val+05\_161  
C 1.48603 -0.97091 0.09178  
C -1.90497 -0.33516 0.05827  
N 1.82690 0.29927 0.18163  
O 0.37636 -1.35968 -0.23863  
O -0.75251 0.01494 -0.63743  
H -2.68446 0.38750 -0.23937  
H -2.27148 -1.34070 -0.20425  
H -1.79872 -0.27836 1.15560  
H 1.09313 0.97897 -0.02368  
H 2.74842 0.58323 0.47250

val+05\_162  
C 2.65754 -0.38038 0.11197  
C -1.46548 0.27161 -0.34099  
N 1.67976 0.28747 -0.27792  
O -0.47551 1.30062 -0.34113

Supplementary Material (ESI) for PCCP  
This journal is © the Owner Societies 2011

|   |          |          |          |
|---|----------|----------|----------|
| O | 0.52483  | 0.93711  | 0.60378  |
| H | 2.67730  | -0.55092 | 1.19538  |
| H | -1.91523 | 0.16689  | 0.65164  |
| H | -2.21838 | 0.60896  | -1.06001 |
| H | -1.04465 | -0.68877 | -0.66273 |
| H | 1.41733  | 0.60592  | -1.21068 |

val+05\_17

|   |          |          |          |
|---|----------|----------|----------|
| C | 0.50458  | 1.17660  | 0.06490  |
| C | -1.01085 | -1.00754 | -0.08341 |
| N | 0.21738  | -0.22045 | -0.25621 |
| O | 0.21637  | 0.61775  | -1.37037 |
| O | 1.32023  | -1.08565 | -0.17649 |
| H | -0.46959 | 1.59799  | 0.38087  |
| H | -1.85125 | -0.33362 | -0.23977 |
| H | -1.01295 | -1.42102 | 0.92672  |
| H | -1.01277 | -1.80964 | -0.82458 |
| H | 2.01837  | -0.43213 | 0.05664  |

val+05\_18

|   |          |          |          |
|---|----------|----------|----------|
| C | 1.05216  | 0.87726  | 1.04820  |
| C | 0.41056  | -0.11194 | 0.19556  |
| N | -0.06856 | 1.30513  | 0.02098  |
| O | -0.48739 | -0.95162 | 0.84569  |
| O | -1.34721 | -1.56102 | -0.18663 |
| H | 2.00461  | 1.19642  | 0.61281  |
| H | 0.75256  | -0.54814 | -0.74937 |
| H | -0.96872 | 1.53900  | 0.42981  |
| H | 0.08552  | 1.72438  | -0.89675 |
| H | -1.24864 | -2.49448 | 0.07190  |

val+05\_19

|   |          |          |          |
|---|----------|----------|----------|
| C | -0.24767 | 0.43749  | 0.73499  |
| C | 0.43513  | -0.70215 | 0.01017  |
| N | 0.37133  | 1.35132  | -0.31917 |
| O | 1.04466  | 0.28653  | -1.01507 |
| O | -0.29252 | -1.71215 | -0.57680 |
| H | -1.33137 | 0.42827  | 0.56705  |
| H | 1.29426  | -1.20379 | 0.46849  |
| H | -0.23309 | 1.89094  | -0.95844 |
| H | 1.09691  | 1.98549  | 0.03067  |
| H | -1.14272 | -1.32804 | -0.85519 |

val+05\_1

|   |          |          |          |
|---|----------|----------|----------|
| C | 0.59237  | 2.76936  | 0.42889  |
| C | 0.99388  | 3.89834  | 0.56705  |
| N | -0.27281 | -0.45434 | -0.16859 |
| O | -1.15867 | -0.92590 | 0.76996  |
| O | -1.43227 | -2.36654 | 0.48458  |
| H | 0.23803  | 1.76390  | 0.30347  |
| H | 1.34746  | 4.89696  | 0.69025  |
| H | -0.69729 | -0.57093 | -1.09219 |
| H | 0.57355  | -1.02876 | -0.13268 |
| H | -1.14636 | -2.74900 | 1.33485  |

val+05\_20

|   |          |          |          |
|---|----------|----------|----------|
| C | 0.15144  | 1.10067  | -0.12025 |
| C | 1.32694  | -0.94171 | -0.00121 |
| N | 0.14049  | 2.30321  | -0.49224 |
| O | 1.29506  | 0.36416  | -0.38435 |
| O | 0.44733  | -1.54735 | 0.55192  |
| H | -0.62069 | 0.52841  | 0.39444  |
| H | 2.30340  | -1.35755 | -0.28398 |
| H | -2.91498 | -1.85021 | 0.90314  |
| H | -0.75233 | 2.73041  | -0.23796 |
| H | -2.17336 | -1.85953 | 0.85068  |

val+05\_21

|   |          |          |          |
|---|----------|----------|----------|
| C | 0.35725  | 0.00331  | -0.49232 |
| C | -0.26909 | 1.13656  | 0.20601  |
| N | 0.67927  | 0.20566  | 0.87150  |
| O | -1.68741 | -1.28347 | 0.06825  |
| O | -0.41402 | -1.22189 | -0.73884 |
| H | 1.09335  | 0.10547  | -1.28793 |
| H | -1.29205 | 0.99411  | 0.53577  |
| H | 0.05350  | 2.14282  | -0.05671 |
| H | 1.61770  | 0.58669  | 0.97910  |

Supplementary Material (ESI) for PCCP  
This journal is © the Owner Societies 2011

|           |          |          |          |
|-----------|----------|----------|----------|
| H         | -0.78511 | -1.15836 | -1.63723 |
| val+05_23 |          |          |          |
| C         | 1.01223  | 1.20623  | -0.38160 |
| C         | -0.81140 | 0.94134  | -0.12397 |
| N         | 0.39210  | 0.09349  | -0.19668 |
| O         | 0.03084  | 2.14642  | -0.35126 |
| O         | -1.48441 | -1.90032 | 0.55984  |
| H         | 2.05915  | 1.45619  | -0.53565 |
| H         | -1.52485 | 0.80510  | -0.93765 |
| H         | -1.29327 | 0.97529  | 0.85329  |
| H         | -0.57258 | -1.58934 | 0.40877  |
| H         | -1.66583 | -2.45669 | -0.21199 |
| val+05_24 |          |          |          |
| C         | 0.21512  | 1.81786  | 0.78793  |
| C         | -0.47114 | -0.56427 | -0.27210 |
| N         | 0.45981  | 0.36565  | 0.41352  |
| O         | 0.96591  | 1.34135  | -0.47066 |
| O         | -1.18592 | -1.32972 | 0.64976  |
| H         | -0.81867 | 1.96423  | 0.39662  |
| H         | -1.16137 | 0.08089  | -0.81628 |
| H         | 0.11345  | -1.17119 | -0.97669 |
| H         | 1.20481  | -0.08978 | 0.94405  |
| H         | -0.69842 | -2.14531 | 0.84025  |
| val+05_25 |          |          |          |
| C         | -0.24629 | -1.39539 | 0.37855  |
| C         | 0.91352  | 2.39279  | -0.19712 |
| N         | 0.45683  | -0.36819 | 0.16065  |
| O         | 2.10915  | 2.52872  | -0.31845 |
| O         | -1.58880 | -1.27445 | 0.51204  |
| H         | 0.12799  | -2.42374 | 0.47628  |
| H         | 0.24103  | 2.22817  | -1.06201 |
| H         | 0.40427  | 2.44169  | 0.78559  |
| H         | 1.44340  | -0.61413 | 0.08455  |
| H         | -1.97329 | -2.14887 | 0.67371  |
| val+05_26 |          |          |          |
| C         | -0.02961 | 1.65706  | -0.02179 |
| C         | -0.39307 | -2.66153 | 0.62012  |
| N         | -0.50910 | -1.41451 | 0.41423  |
| O         | 1.07943  | 1.20185  | 0.14548  |
| O         | -0.29138 | 2.95610  | -0.24599 |
| H         | -0.95450 | 1.06744  | -0.01106 |
| H         | 0.55565  | -3.19049 | 0.78676  |
| H         | -1.29245 | -3.28425 | 0.63849  |
| H         | 0.40357  | -0.94414 | 0.42088  |
| H         | 0.56835  | 3.42118  | -0.24311 |
| val+05_27 |          |          |          |
| C         | -1.14828 | -1.76307 | 0.42921  |
| C         | 0.29166  | 2.42697  | -0.31887 |
| N         | -0.51369 | -0.68630 | 0.17656  |
| O         | 1.34261  | 1.84684  | -0.50256 |
| O         | 0.82518  | -0.92175 | -0.11458 |
| H         | -0.67420 | -2.74532 | 0.41306  |
| H         | -2.20331 | -1.66979 | 0.66738  |
| H         | 0.22665  | 3.52837  | -0.41114 |
| H         | -0.62993 | 1.88215  | -0.05527 |
| H         | 1.16600  | -0.01740 | -0.28098 |
| val+05_28 |          |          |          |
| C         | 0.74401  | 0.84055  | -0.40955 |
| C         | 0.73501  | -0.64536 | -0.20680 |
| N         | -0.79280 | 1.26474  | 0.14055  |
| O         | 1.30192  | 0.17354  | 0.77624  |
| O         | -0.45809 | -1.31413 | 0.15067  |
| H         | 1.42485  | -1.28850 | -0.75763 |
| H         | -0.65956 | 1.94035  | 0.89166  |
| H         | -1.32214 | 0.44892  | 0.48063  |
| H         | -1.28064 | 1.71839  | -0.63103 |
| H         | -0.23276 | -1.98179 | 0.81897  |
| val+05_29 |          |          |          |
| C         | 0.59988  | 0.85626  | -0.23574 |
| C         | -0.82644 | 1.16176  | -0.45156 |

Supplementary Material (ESI) for PCCP  
This journal is © the Owner Societies 2011

|   |          |          |          |
|---|----------|----------|----------|
| N | -0.30754 | 0.72105  | 0.88069  |
| O | 1.25387  | -0.24289 | -0.83134 |
| O | 0.29996  | -1.33739 | -0.97440 |
| H | 1.36338  | 1.62968  | -0.16658 |
| H | -1.40158 | 0.44956  | -1.03663 |
| H | -1.17633 | 2.19085  | -0.49099 |
| H | -0.53298 | -0.26653 | 1.00672  |
| H | 0.80308  | -2.03566 | -0.51896 |

|          |          |          |          |
|----------|----------|----------|----------|
| val+05_2 |          |          |          |
| C        | -0.34984 | 0.28537  | 0.28883  |
| C        | 0.78974  | 1.11163  | 0.46432  |
| N        | -0.03229 | -0.93913 | -0.26733 |
| O        | 1.93300  | 0.76754  | 0.11003  |
| O        | 0.08677  | -2.22642 | 0.67402  |
| H        | -1.36680 | 0.48663  | 0.58995  |
| H        | 0.61175  | 2.11060  | 0.90550  |
| H        | -0.68103 | -1.35468 | -0.93315 |
| H        | 0.93451  | -0.84962 | -0.62960 |
| H        | 0.44129  | -1.80152 | 1.47841  |

|           |          |          |          |
|-----------|----------|----------|----------|
| val+05_30 |          |          |          |
| C         | 0.62994  | 1.00162  | -0.01342 |
| C         | -0.76355 | 1.43168  | 0.25463  |
| N         | -0.27562 | 0.12410  | 0.75543  |
| O         | -0.67826 | -0.91425 | -0.17757 |
| O         | -1.93410 | -1.41183 | 0.30312  |
| H         | 1.46630  | 1.38935  | 0.56135  |
| H         | 0.86530  | 0.67359  | -1.02223 |
| H         | -1.47305 | 1.38722  | -0.56539 |
| H         | -0.98326 | 2.14934  | 1.04024  |
| H         | -1.63980 | -1.97552 | 1.04495  |

|           |          |          |          |
|-----------|----------|----------|----------|
| val+05_31 |          |          |          |
| C         | 0.83677  | -0.71586 | 0.27251  |
| C         | 2.08595  | -1.08555 | 0.42534  |
| N         | -0.35219 | -0.40615 | 0.22504  |
| O         | -3.15887 | -0.10571 | 0.52903  |
| O         | -2.86850 | 0.57938  | -0.72310 |
| H         | 2.81473  | -0.40406 | 0.85009  |
| H         | 2.40949  | -2.07297 | 0.11505  |
| H         | -0.69832 | 0.04904  | -0.62718 |
| H         | -2.24581 | -0.37316 | 0.78123  |
| H         | -3.11387 | 1.48904  | -0.47833 |

|           |          |          |          |
|-----------|----------|----------|----------|
| val+05_32 |          |          |          |
| C         | -1.37134 | 0.97928  | -0.30746 |
| C         | -0.08172 | 0.64462  | -0.52160 |
| N         | -2.04806 | -0.31707 | 0.27698  |
| O         | 0.42264  | -0.65164 | -0.39824 |
| O         | 1.39850  | -0.69905 | 0.74777  |
| H         | 0.64182  | 1.37057  | -0.88853 |
| H         | -2.47460 | -0.07675 | 1.17282  |
| H         | -2.80340 | -0.61111 | -0.34393 |
| H         | -1.37653 | -1.09564 | 0.39722  |
| H         | 2.21880  | -0.83071 | 0.23877  |

|           |          |          |          |
|-----------|----------|----------|----------|
| val+05_33 |          |          |          |
| C         | -0.92200 | 1.61364  | 0.05847  |
| C         | 0.54834  | 1.18346  | 0.10975  |
| N         | 0.15099  | -0.14908 | -0.51276 |
| O         | -1.03875 | 0.38939  | -0.98891 |
| O         | -0.03888 | -1.23200 | 0.40360  |
| H         | -1.42542 | 1.17593  | 0.94803  |
| H         | 1.18720  | 1.66241  | -0.64557 |
| H         | 1.10304  | 1.06415  | 1.04642  |
| H         | 0.71452  | -0.58663 | -1.26149 |
| H         | -0.69845 | -0.83618 | 1.01637  |

|           |          |          |         |
|-----------|----------|----------|---------|
| val+05_34 |          |          |         |
| C         | -0.55812 | 0.24791  | 0.27564 |
| C         | -1.29317 | -1.95673 | 0.04350 |
| N         | 0.65214  | -0.02646 | 0.12847 |
| O         | -1.64312 | -0.70779 | 0.24610 |
| O         | 1.02586  | 2.84109  | 0.57849 |
| H         | -0.94968 | 1.24514  | 0.44788 |
| H         | -2.27762 | -2.47812 | 0.06488 |

Supplementary Material (ESI) for PCCP  
This journal is © the Owner Societies 2011

|   |         |          |          |
|---|---------|----------|----------|
| H | 0.75808 | -1.04431 | -0.01501 |
| H | 1.33309 | 1.91941  | 0.49104  |
| H | 1.22446 | 3.22897  | -0.28669 |

|           |          |          |          |
|-----------|----------|----------|----------|
| val+05_35 |          |          |          |
| C         | -1.16897 | 0.95166  | -0.15119 |
| C         | 0.13743  | 1.21920  | -0.25702 |
| N         | -1.01368 | -1.36369 | 0.25861  |
| O         | -1.81351 | -0.24382 | -0.23223 |
| O         | 1.09494  | 0.26890  | -0.57476 |
| H         | -1.87705 | 1.76729  | -0.03669 |
| H         | 0.47993  | 2.24836  | -0.16896 |
| H         | -0.27261 | -1.46700 | -0.44082 |
| H         | -1.67154 | -2.12675 | 0.08828  |
| H         | 1.82248  | 0.33306  | 0.06417  |

|           |          |          |          |
|-----------|----------|----------|----------|
| val+05_36 |          |          |          |
| C         | -0.27322 | 1.30050  | -0.37013 |
| C         | 0.56034  | 0.05867  | -0.20035 |
| N         | -0.17725 | -1.25188 | -0.02925 |
| O         | -0.69744 | -1.68210 | -1.19536 |
| O         | -1.50635 | 1.01600  | 0.00600  |
| H         | 1.22868  | 0.25633  | 0.65617  |
| H         | 1.17573  | -0.08873 | -1.09189 |
| H         | 0.49051  | -1.92747 | 0.40290  |
| H         | -0.90299 | -1.09192 | 0.69895  |
| H         | -2.04731 | 1.81970  | -0.08934 |

|           |          |          |          |
|-----------|----------|----------|----------|
| val+05_37 |          |          |          |
| C         | 0.85232  | 0.55659  | -0.42337 |
| C         | -1.98554 | 1.26707  | 0.93860  |
| N         | 2.03575  | 0.48163  | -1.03989 |
| O         | -1.92259 | 0.07378  | 1.16916  |
| O         | 0.54205  | -0.67602 | 0.01719  |
| H         | -2.85946 | 1.85969  | 1.27506  |
| H         | 2.56299  | -0.38915 | -1.12821 |
| H         | 2.43777  | 1.31428  | -1.44073 |
| H         | -1.17595 | 1.77988  | 0.39173  |
| H         | -0.32715 | -0.59626 | 0.46466  |

|           |          |          |          |
|-----------|----------|----------|----------|
| val+05_38 |          |          |          |
| C         | -0.68745 | 0.85024  | 0.06356  |
| C         | 0.49488  | 0.25684  | 0.24951  |
| N         | 0.67083  | -1.06696 | -0.25555 |
| O         | -0.93195 | 2.12996  | 0.47112  |
| O         | 1.18807  | -1.90376 | 0.82644  |
| H         | 1.30870  | 0.75294  | 0.77877  |
| H         | -1.49106 | 0.32364  | -0.44845 |
| H         | 1.45650  | -1.08498 | -0.90529 |
| H         | -1.84836 | 2.35818  | 0.26360  |
| H         | 0.40874  | -2.43521 | 1.05509  |

|           |          |          |          |
|-----------|----------|----------|----------|
| val+05_39 |          |          |          |
| C         | -1.57282 | 0.25488  | 0.16832  |
| C         | -0.29476 | -0.05604 | -0.15201 |
| N         | -0.13199 | -1.53737 | -0.27529 |
| O         | -1.84645 | 1.57621  | 0.40870  |
| O         | 0.92211  | 0.63098  | -0.18892 |
| H         | 0.17779  | -1.88954 | -1.19253 |
| H         | 0.47799  | -1.96035 | 0.43781  |
| H         | -1.12993 | -1.78497 | -0.09866 |
| H         | -1.02156 | 2.10751  | 0.39282  |
| H         | 1.04893  | 0.99149  | -1.08367 |

|          |          |          |          |
|----------|----------|----------|----------|
| val+05_3 |          |          |          |
| C        | -0.77805 | -0.39727 | 0.20868  |
| C        | 0.56065  | -0.38022 | 0.08482  |
| N        | 1.20287  | -1.71384 | 0.25806  |
| O        | -1.67604 | 0.43970  | 0.13769  |
| O        | -1.07704 | 2.10152  | -0.25523 |
| H        | 1.23268  | 0.43647  | -0.14169 |
| H        | 0.41313  | -2.34900 | 0.45166  |
| H        | 1.86353  | -1.77335 | 1.04577  |
| H        | 1.69652  | -2.06288 | -0.57572 |
| H        | -1.68865 | 2.52337  | 0.37327  |

val+05\_40

Supplementary Material (ESI) for PCCP  
This journal is © the Owner Societies 2011

|   |          |          |          |
|---|----------|----------|----------|
| C | -0.96499 | 1.56076  | -0.36270 |
| C | -0.02876 | 0.90990  | 0.33568  |
| N | -0.13572 | -0.53571 | 0.04812  |
| O | 0.92319  | -1.08281 | -0.78058 |
| O | -0.15162 | -1.36606 | 1.18479  |
| H | -0.91129 | 2.65060  | -0.22523 |
| H | 0.79461  | 1.09515  | 1.02769  |
| H | -1.03091 | -0.56403 | -0.48835 |
| H | 1.14375  | -0.31484 | -1.34522 |
| H | -0.01327 | -2.26617 | 0.82898  |

val+05\_41

|   |          |          |          |
|---|----------|----------|----------|
| C | -0.35478 | 0.81029  | -0.21283 |
| C | -1.50633 | 1.47893  | -0.18893 |
| N | -0.15924 | -0.57863 | 0.02957  |
| O | 0.85202  | 1.40981  | -0.46578 |
| O | -1.38778 | -1.27943 | 0.20697  |
| H | -1.50227 | 2.55763  | -0.27886 |
| H | -2.44419 | 0.94952  | -0.09733 |
| H | 0.27652  | -1.01294 | -0.78581 |
| H | 1.51835  | 0.97240  | 0.09308  |
| H | -1.36599 | -1.51598 | 1.14862  |

val+05\_42

|   |          |          |          |
|---|----------|----------|----------|
| C | 0.19972  | -0.17978 | -0.81361 |
| C | -0.88084 | 0.46959  | -0.07384 |
| N | -0.18351 | -0.77877 | 0.45335  |
| O | -0.77212 | 1.59603  | 0.73576  |
| O | -0.73718 | -2.11503 | 0.43031  |
| H | 1.19521  | 0.26702  | -0.81246 |
| H | -1.92975 | 0.29199  | -0.30895 |
| H | 0.27298  | -0.68000 | 1.36154  |
| H | 0.10718  | 1.97990  | 0.58285  |
| H | -0.60049 | -2.31785 | -0.52014 |

val+05\_43

|   |          |          |          |
|---|----------|----------|----------|
| C | 0.28257  | 0.61719  | 1.06861  |
| C | -0.41119 | 1.17913  | -0.16504 |
| N | 0.03048  | -0.20896 | -0.08539 |
| O | 0.95048  | -0.59322 | -1.09349 |
| O | -0.89253 | -1.29770 | 0.06316  |
| H | 1.34637  | 0.85480  | 1.12895  |
| H | -1.49271 | 1.31439  | -0.14910 |
| H | 0.09744  | 1.72256  | -0.96636 |
| H | 1.43705  | -1.32863 | -0.67325 |
| H | -1.00507 | -1.25555 | 1.03800  |

val+05\_44

|   |          |          |          |
|---|----------|----------|----------|
| C | -0.03085 | -0.29560 | -0.37055 |
| C | 0.52991  | 0.79839  | -1.13855 |
| N | -0.46941 | 1.08275  | 0.08820  |
| O | 0.57829  | -0.97616 | 0.70628  |
| O | -1.02575 | -1.07732 | -0.91814 |
| H | 1.52660  | 1.05540  | -0.75577 |
| H | -1.39024 | 1.41726  | -0.17846 |
| H | -0.18055 | 1.32918  | 1.03395  |
| H | 1.51372  | -1.08445 | 0.47666  |
| H | -1.29232 | -1.71044 | -0.22924 |

val+05\_45

|   |          |          |          |
|---|----------|----------|----------|
| C | -0.16588 | 0.53809  | 0.24869  |
| C | -0.17461 | -0.80680 | 0.21722  |
| N | -1.30694 | 1.32612  | 0.34182  |
| O | 0.96281  | 1.30353  | 0.14351  |
| O | -1.36691 | -1.49120 | 0.47080  |
| H | 0.72774  | -1.39872 | 0.07605  |
| H | -2.09507 | 0.77807  | 0.67006  |
| H | -1.16169 | 2.15533  | 0.90904  |
| H | 1.73118  | 0.71187  | 0.14188  |
| H | -1.70512 | -1.83497 | -0.37238 |

val+05\_46

|   |          |          |          |
|---|----------|----------|----------|
| C | 0.49005  | -0.47197 | 0.37966  |
| C | -0.80553 | 0.26377  | 0.40516  |
| N | -0.18307 | -0.09924 | -0.85988 |
| O | 0.49298  | -1.84365 | 0.65697  |
| O | -0.91905 | 1.62533  | 0.67137  |



Supplementary Material (ESI) for PCCP  
This journal is © the Owner Societies 2011

|   |          |          |          |
|---|----------|----------|----------|
| H | 1.43389  | 0.04571  | 0.56340  |
| H | -1.67892 | -0.28937 | 0.74791  |
| H | -0.61817 | -0.91240 | -1.29550 |
| H | 0.59282  | -1.95758 | 1.61583  |
| H | -0.49541 | 2.07782  | -0.07712 |

val+05\_47

|   |          |          |          |
|---|----------|----------|----------|
| C | 0.54333  | 0.10670  | 0.27714  |
| C | -0.53391 | 0.91863  | -0.35568 |
| N | -0.62224 | -0.56284 | -0.26485 |
| O | 1.77528  | -0.16635 | -0.30352 |
| O | -1.51485 | -0.96827 | 0.79460  |
| H | 0.61767  | 0.14464  | 1.36025  |
| H | -1.18401 | 1.48172  | 0.30931  |
| H | -0.44215 | 1.29778  | -1.37130 |
| H | 1.59618  | -0.59019 | -1.15908 |
| H | -2.03410 | -1.66311 | 0.35883  |

val+05\_49

|   |          |          |          |
|---|----------|----------|----------|
| C | 0.91165  | -0.37673 | 0.39323  |
| C | 2.21250  | -0.36695 | 0.43947  |
| N | -0.35393 | -0.37425 | 0.31473  |
| O | -2.72170 | -0.00395 | -0.88538 |
| O | -1.21489 | -0.76865 | 1.21119  |
| H | 2.76283  | 0.49190  | 0.82315  |
| H | 2.80014  | -1.22206 | 0.10610  |
| H | -0.81465 | -0.02542 | -0.55373 |
| H | -3.11713 | 0.85631  | -0.67820 |
| H | -2.59063 | -0.42370 | -0.00028 |

val+05\_4

|   |          |          |          |
|---|----------|----------|----------|
| C | -0.19157 | 1.30131  | 1.25159  |
| C | 0.41556  | 1.54417  | -0.02818 |
| N | -0.80466 | 0.18838  | 1.50908  |
| O | 1.46813  | 1.02268  | -0.42729 |
| O | 0.30387  | -1.54228 | -0.37528 |
| H | -0.04241 | 2.38813  | -0.58828 |
| H | -0.81900 | -0.60528 | 0.84379  |
| H | 0.08172  | -1.64334 | -1.31325 |
| H | -1.15060 | 0.00476  | 2.44825  |
| H | 0.98687  | -0.83524 | -0.36833 |

val+05\_50

|   |          |          |          |
|---|----------|----------|----------|
| C | 0.15222  | 0.14674  | 0.35906  |
| C | 1.42534  | 0.28713  | 0.05244  |
| N | -1.08210 | 0.05149  | 0.45878  |
| O | 2.29666  | -0.71611 | -0.31379 |
| O | -3.59244 | -0.27029 | -1.12241 |
| H | 1.90853  | 1.25358  | 0.13667  |
| H | -1.41365 | -0.14949 | 1.41152  |
| H | -2.68714 | -0.15031 | -0.77781 |
| H | 1.79205  | -1.51737 | -0.52591 |
| H | -3.84978 | 0.62204  | -1.39606 |

val+05\_51

|   |          |          |          |
|---|----------|----------|----------|
| C | -0.98648 | 0.31814  | -0.50603 |
| C | 0.28178  | 0.06467  | -0.15319 |
| N | -1.75178 | -1.00584 | -0.26749 |
| O | 1.27611  | 1.01472  | -0.17534 |
| O | 0.81098  | -1.15014 | 0.27324  |
| H | -2.60721 | -0.81141 | 0.25663  |
| H | -1.20357 | -1.72457 | 0.23955  |
| H | -2.04684 | -1.41044 | -1.16014 |
| H | 0.81608  | 1.83861  | -0.41307 |
| H | 1.58493  | -0.94873 | 0.82505  |

val+05\_52

|   |          |          |          |
|---|----------|----------|----------|
| C | 0.33426  | -0.73617 | 0.30793  |
| C | -0.76609 | -1.50287 | 0.28847  |
| N | 0.42470  | 0.56006  | -0.17579 |
| O | 0.23243  | 2.37287  | 1.31295  |
| O | 0.91351  | 3.33507  | 0.92770  |
| H | 1.24890  | -1.08532 | 0.78085  |
| H | -0.76095 | -2.48173 | 0.75250  |
| H | -1.69422 | -1.17066 | -0.16948 |
| H | -0.33024 | 0.89126  | -0.76353 |
| H | 1.33562  | 0.89240  | -0.46308 |

Supplementary Material (ESI) for PCCP  
This journal is © the Owner Societies 2011

val+05\_53  
C -0.62983 -0.13681 0.01132  
C 0.00420 1.04450 -0.01324  
N 0.08965 -1.38749 0.08007  
O 1.31841 1.34611 0.00016  
O 2.21789 0.21740 -0.19724  
H -1.71817 -0.13465 -0.01078  
H -0.55715 1.97581 -0.02392  
H -0.14016 -1.99688 -0.70437  
H 1.62568 -0.56956 -0.00911  
H -0.13972 -1.89803 0.93211

val+05\_54  
C -0.87756 1.21641 -0.23594  
C 0.65117 1.16913 -0.35094  
N -0.13717 -1.29313 0.35053  
O -1.61498 1.19313 -1.19285  
O 1.23451 1.10438 -1.40710  
H -1.24977 1.30928 0.80799  
H 1.18016 1.23539 0.62513  
H -0.90213 -1.70973 0.87918  
H 0.72198 -1.74727 0.65678  
H -0.27611 -1.55089 -0.62559

val+05\_55  
C -0.00792 0.03102 0.23977  
C -1.25645 0.44422 0.00459  
N 0.53515 -1.25263 0.02167  
O 0.91567 0.89689 0.76576  
O 2.08947 0.97071 -0.12992  
H -2.05070 -0.25906 -0.22227  
H -1.49612 1.49852 0.05834  
H -0.09257 -1.87448 -0.47619  
H 2.21352 0.01732 -0.32663  
H 0.86123 -1.68991 0.88198

val+05\_56  
C 0.20453 0.33701 0.08696  
C -0.03057 1.64962 0.04871  
N -0.37378 -1.89207 -0.34648  
O -0.62918 -0.51530 -0.65167  
O 1.19956 -0.26141 0.75897  
H -0.86098 2.03756 -0.52545  
H 0.62297 2.32872 0.57882  
H -1.25763 -2.23497 0.03384  
H -0.25662 -2.32389 -1.26331  
H 1.04040 -1.22776 0.65092

val+05\_57  
C 0.32345 0.17211 0.66132  
C -0.02386 1.21744 -0.09591  
N 0.56487 -1.17958 0.60908  
O 0.40745 0.99100 1.83567  
O 0.02281 2.12060 0.97204  
H -0.28113 1.51158 -1.10066  
H 0.28252 -2.39266 -1.89927  
H -0.08511 -1.74073 1.15409  
H 0.21959 -2.76033 -2.54341  
H 1.52231 -1.44114 0.83105

val+05\_58  
C 0.46298 0.84973 0.20123  
C 0.72737 -0.45828 -0.19531  
N -0.39280 -1.40890 -0.04637  
O -0.91710 0.99843 0.57013  
O 1.19139 1.83582 0.25798  
H 1.69854 -0.87475 -0.40066  
H -0.28002 -2.12381 0.69016  
H -0.99636 1.94081 0.79075  
H -1.19366 -0.81124 0.22285  
H -0.64615 -1.91152 -0.90797

val+05\_59  
C -0.07550 0.65561 0.54831  
C 0.07982 2.10165 0.77715  
N -0.25236 -2.30410 -0.14855

Supplementary Material (ESI) for PCCP  
This journal is © the Owner Societies 2011

|   |          |          |          |
|---|----------|----------|----------|
| O | 1.15437  | 2.64225  | 0.99794  |
| O | -0.01631 | 0.27944  | -0.68866 |
| H | -0.89300 | 2.63352  | 0.93487  |
| H | -1.09402 | -2.82587 | -0.38411 |
| H | -0.10948 | -0.74282 | -0.68603 |
| H | 0.54638  | -2.91823 | -0.29420 |
| H | -0.29280 | -2.07355 | 0.84469  |

|           |          |          |          |
|-----------|----------|----------|----------|
| val+05_60 |          |          |          |
| C         | -0.05289 | -0.70555 | 0.00911  |
| C         | -1.48086 | -0.29417 | -0.04859 |
| N         | 0.88546  | 0.18528  | 0.16080  |
| O         | 0.68233  | 1.50304  | 0.27615  |
| O         | 1.94277  | 2.11704  | 0.41889  |
| H         | 0.28835  | -1.73026 | -0.06750 |
| H         | -1.64865 | 0.40942  | -0.87570 |
| H         | -2.12951 | -1.16185 | -0.18090 |
| H         | -1.77025 | 0.23372  | 0.87060  |
| H         | 1.90073  | 0.02953  | 0.21403  |

|           |          |          |          |
|-----------|----------|----------|----------|
| val+05_61 |          |          |          |
| C         | -0.13580 | 1.23813  | -0.48770 |
| C         | -0.33172 | -1.23630 | 0.03316  |
| N         | 0.53183  | -0.03809 | -0.12871 |
| O         | 0.25420  | 1.93041  | -1.38697 |
| O         | 1.05035  | 0.41362  | 1.06032  |
| H         | -0.92591 | 1.44933  | 0.24264  |
| H         | -1.14839 | -0.95826 | 0.70046  |
| H         | 0.28197  | -1.99867 | 0.51572  |
| H         | -0.70776 | -1.57760 | -0.93687 |
| H         | 1.25954  | -0.21647 | -0.84084 |

|           |          |          |          |
|-----------|----------|----------|----------|
| val+05_62 |          |          |          |
| C         | 0.72395  | 1.40439  | -0.69630 |
| C         | -0.97090 | -1.20776 | -0.02167 |
| N         | 0.97330  | 0.07903  | -0.07256 |
| O         | 1.58136  | 1.10382  | 0.60453  |
| O         | 0.08927  | -0.65624 | 0.76871  |
| H         | -0.25088 | 1.66959  | -0.23611 |
| H         | -1.55069 | -0.41909 | -0.51335 |
| H         | -0.59245 | -1.91773 | -0.76946 |
| H         | -1.59821 | -1.73963 | 0.69552  |
| H         | 1.63884  | -0.57429 | -0.49662 |

|           |          |          |          |
|-----------|----------|----------|----------|
| val+05_63 |          |          |          |
| C         | 0.14458  | 0.08311  | -0.11032 |
| C         | 0.40496  | -1.37621 | 0.05595  |
| N         | -1.03350 | 0.63269  | -0.34166 |
| O         | 1.14812  | 0.88926  | -0.02257 |
| O         | 0.76923  | 2.25443  | -0.19881 |
| H         | -0.16149 | -1.77805 | 0.90394  |
| H         | 1.47055  | -1.53348 | 0.23407  |
| H         | 0.10803  | -1.92921 | -0.84260 |
| H         | -1.89243 | 0.11488  | -0.43110 |
| H         | -0.89605 | 1.66497  | -0.40799 |

|           |          |          |          |
|-----------|----------|----------|----------|
| val+05_65 |          |          |          |
| C         | 0.56452  | -0.45449 | -0.17222 |
| C         | -0.96555 | 1.30154  | 0.13803  |
| N         | 0.90933  | -1.70650 | 0.26440  |
| O         | -0.48444 | 0.01719  | 0.55343  |
| O         | 1.09095  | 0.13864  | -1.09280 |
| H         | -0.17872 | 2.05645  | 0.21942  |
| H         | -1.31778 | 1.26753  | -0.89656 |
| H         | -1.78986 | 1.53541  | 0.81323  |
| H         | 1.80327  | -2.05208 | -0.04988 |
| H         | 0.58160  | -2.01211 | 1.16893  |

|           |          |          |          |
|-----------|----------|----------|----------|
| val+05_69 |          |          |          |
| C         | -0.58821 | -1.75654 | 0.10444  |
| C         | 1.06520  | 1.95319  | -0.38608 |
| N         | -0.13020 | -0.54807 | -0.00823 |
| O         | 1.79536  | 1.11189  | -0.89232 |
| O         | -0.65894 | 0.53145  | 0.41340  |
| H         | -0.00279 | -2.56245 | -0.31667 |
| H         | -1.53096 | -1.91331 | 0.61110  |
| H         | 0.29722  | 2.49265  | -0.96837 |

Supplementary Material (ESI) for PCCP  
This journal is © the Owner Societies 2011

|           |          |          |          |
|-----------|----------|----------|----------|
| H         | 1.20431  | 2.30506  | 0.65160  |
| H         | 0.77941  | -0.40088 | -0.49778 |
| val+05_6  |          |          |          |
| C         | 0.07630  | -0.37432 | -0.11628 |
| C         | 0.96619  | 0.62635  | -0.06947 |
| N         | 0.53277  | -1.71279 | -0.00697 |
| O         | 2.31045  | 0.42726  | 0.08009  |
| O         | -1.29340 | -0.23569 | -0.26544 |
| H         | 0.70025  | 1.67621  | -0.14542 |
| H         | 0.10041  | -2.17647 | 0.79273  |
| H         | 2.41162  | -0.54400 | 0.13587  |
| H         | 0.26923  | -2.25172 | -0.83253 |
| H         | -1.50803 | 0.70926  | -0.33107 |
| val+05_70 |          |          |          |
| C         | 1.03116  | 0.80189  | -0.02639 |
| C         | -0.83984 | -1.12996 | 0.31646  |
| N         | 0.31680  | -0.49257 | -0.45193 |
| O         | 0.21959  | 1.76737  | 0.50699  |
| O         | 1.20910  | 0.95286  | 1.32299  |
| H         | 1.84322  | 1.12234  | -0.69140 |
| H         | -0.43442 | -1.26820 | 1.32895  |
| H         | -1.58374 | -0.32320 | 0.38268  |
| H         | -0.00914 | -0.33283 | -1.40930 |
| H         | 1.04899  | -1.20301 | -0.53845 |
| val+05_71 |          |          |          |
| C         | 1.09148  | -0.48262 | 0.49251  |
| C         | -1.33277 | -0.49974 | -0.02922 |
| N         | -0.03784 | 0.10468  | 0.24633  |
| O         | -0.09232 | 1.48101  | 0.15981  |
| O         | 1.13990  | 2.03611  | 0.35518  |
| H         | 1.93051  | 0.19213  | 0.61646  |
| H         | 1.11323  | -1.56088 | 0.55633  |
| H         | -2.09735 | 0.22550  | 0.25292  |
| H         | -1.41903 | -0.73342 | -1.09398 |
| H         | -1.44152 | -1.40829 | 0.56586  |
| val+05_72 |          |          |          |
| C         | -0.86716 | -0.37706 | 0.33430  |
| C         | 0.42099  | -1.12162 | 0.07241  |
| N         | -0.88201 | 0.89154  | 0.43513  |
| O         | 1.57980  | -0.33365 | 0.21955  |
| O         | 1.56918  | 0.65793  | -0.84328 |
| H         | -1.76551 | -1.00941 | 0.40274  |
| H         | 0.53535  | -1.93037 | 0.80765  |
| H         | 0.37464  | -1.58234 | -0.92776 |
| H         | -1.82686 | 1.24671  | 0.60328  |
| H         | 0.92027  | 1.28638  | -0.45384 |
| val+05_73 |          |          |          |
| C         | 1.42303  | 1.29575  | 0.41982  |
| C         | -1.77958 | -0.58332 | 0.30020  |
| N         | -0.90019 | -1.04943 | -0.61511 |
| O         | 1.64179  | 0.49266  | -0.46695 |
| O         | -1.57247 | 0.33815  | 1.07942  |
| H         | 2.19658  | 2.03036  | 0.71967  |
| H         | -2.74361 | -1.12833 | 0.28471  |
| H         | 0.45583  | 1.31951  | 0.95071  |
| H         | 0.02619  | -0.62571 | -0.69511 |
| H         | -1.14868 | -1.81664 | -1.22175 |
| val+05_74 |          |          |          |
| C         | -1.45640 | -0.58855 | -0.08956 |
| C         | 1.81298  | 1.17400  | -0.18360 |
| N         | -0.42509 | -1.46308 | -0.08892 |
| O         | -1.35343 | 0.63120  | -0.11720 |
| O         | 2.16147  | 0.00895  | -0.16537 |
| H         | -2.44355 | -1.08993 | -0.06177 |
| H         | 0.74643  | 1.45726  | -0.17100 |
| H         | 2.56462  | 1.98769  | -0.21359 |
| H         | 0.53654  | -1.11842 | -0.11311 |
| H         | -0.59506 | -2.45752 | -0.06517 |
| val+05_76 |          |          |          |
| C         | -0.62070 | 0.95798  | -0.25626 |

Supplementary Material (ESI) for PCCP  
This journal is © the Owner Societies 2011

|   |          |          |          |
|---|----------|----------|----------|
| C | -0.51090 | -0.41576 | 0.38509  |
| N | 0.88390  | -0.95164 | 0.17067  |
| O | -1.68952 | 1.47405  | -0.49325 |
| O | 1.81446  | -0.12799 | 0.68999  |
| H | 0.35033  | 1.44337  | -0.46713 |
| H | -1.27764 | -1.09497 | -0.00864 |
| H | -0.60773 | -0.32345 | 1.47029  |
| H | 1.00149  | -1.10880 | -0.85415 |
| H | 0.91201  | -1.90850 | 0.57730  |

val+05\_77

|   |          |          |          |
|---|----------|----------|----------|
| C | -1.20197 | 0.22748  | 0.01832  |
| C | 0.22090  | 0.75578  | 0.13600  |
| N | 1.19031  | -1.34064 | 0.05468  |
| O | -2.10959 | 0.59549  | 0.72731  |
| O | 1.15528  | -0.03519 | -0.57304 |
| H | -1.35124 | -0.50870 | -0.80229 |
| H | 0.48226  | 0.86367  | 1.19745  |
| H | 0.26884  | 1.74876  | -0.33122 |
| H | 2.11776  | -1.37560 | 0.48775  |
| H | 1.24506  | -1.97055 | -0.74757 |

val+05\_78

|   |          |          |          |
|---|----------|----------|----------|
| C | 0.11898  | 0.66660  | -0.66270 |
| C | -0.42832 | -0.57587 | 0.01510  |
| N | 0.54937  | -1.66117 | 0.05287  |
| O | -0.52055 | 1.42688  | -1.35234 |
| O | 1.42273  | 0.87780  | -0.35186 |
| H | 1.68070  | 1.69921  | -0.81091 |
| H | -1.30294 | -0.88769 | -0.56159 |
| H | -0.79950 | -0.24159 | 1.00400  |
| H | 1.36944  | -1.36467 | 0.57748  |
| H | 0.15140  | -2.45709 | 0.54705  |

val+05\_79

|   |          |          |          |
|---|----------|----------|----------|
| C | -1.23421 | 0.71635  | 0.77535  |
| C | 0.88321  | 0.29870  | -0.16547 |
| N | 0.62022  | -0.98443 | -0.74019 |
| O | -0.32544 | 1.11939  | -0.11966 |
| O | -1.13120 | -0.23319 | 1.51827  |
| H | -2.10409 | 1.39070  | 0.74365  |
| H | 1.55436  | 0.86988  | -0.80734 |
| H | 1.27584  | 0.27361  | 0.85760  |
| H | 0.39429  | -1.67721 | -0.03476 |
| H | 1.37983  | -1.31110 | -1.32575 |

val+05\_7

|   |          |          |          |
|---|----------|----------|----------|
| C | 0.60637  | 0.22567  | -0.06610 |
| C | -0.33304 | -0.73152 | -0.16321 |
| N | 0.15130  | -2.08017 | -0.00049 |
| O | 1.90751  | -0.06095 | 0.16684  |
| O | 0.36157  | 1.54740  | -0.18716 |
| H | -1.37460 | -0.48982 | -0.35033 |
| H | -0.29563 | -2.55148 | 0.78507  |
| H | 1.90552  | -1.04600 | 0.22639  |
| H | -0.03008 | -2.65064 | -0.82549 |
| H | 1.20938  | 2.00721  | -0.07501 |

val+05\_80

|   |          |          |          |
|---|----------|----------|----------|
| C | 1.10862  | -0.11341 | -0.45455 |
| C | 0.24655  | 1.13607  | -0.23530 |
| N | -1.21488 | -0.95578 | 0.58251  |
| O | 2.00725  | -0.43648 | 0.28577  |
| O | 0.40005  | 1.89200  | 0.69476  |
| H | 0.85658  | -0.68044 | -1.37753 |
| H | -0.51333 | 1.30619  | -1.02939 |
| H | -2.17797 | -0.62403 | 0.60600  |
| H | -0.84217 | -0.85046 | 1.52513  |
| H | -1.24611 | -1.95515 | 0.38640  |

val+05\_81

|   |          |          |          |
|---|----------|----------|----------|
| C | -0.86314 | -0.85692 | 0.31855  |
| C | -1.08707 | 0.63867  | 0.15546  |
| N | 1.60688  | 0.22497  | -0.22115 |
| O | -1.13047 | -1.64855 | -0.55753 |
| O | -1.14375 | 1.39176  | 1.10205  |
| H | -0.50548 | -1.15336 | 1.32639  |

Supplementary Material (ESI) for PCCP  
This journal is © the Owner Societies 2011

|   |          |          |          |
|---|----------|----------|----------|
| H | -1.25914 | 0.95818  | -0.89351 |
| H | 2.14154  | -0.63591 | -0.32493 |
| H | 1.99107  | 0.72577  | 0.57841  |
| H | 1.80036  | 0.79169  | -1.04522 |

val+05\_82

|   |          |          |          |
|---|----------|----------|----------|
| C | 1.08211  | 0.53611  | 0.67503  |
| C | 0.49662  | -1.28273 | 0.83365  |
| N | -1.13523 | 0.58193  | -1.20805 |
| O | 0.26334  | 0.01713  | 1.53446  |
| O | 1.51013  | -0.51379 | 0.04822  |
| H | 1.16974  | 1.57332  | 0.37814  |
| H | 1.04944  | -1.92995 | 1.52861  |
| H | -2.09281 | 0.87496  | -1.01864 |
| H | -1.07493 | 0.44381  | -2.21601 |
| H | -1.03282 | -0.34530 | -0.78731 |

val+05\_83

|   |          |          |          |
|---|----------|----------|----------|
| C | -0.29016 | 0.88408  | -0.18233 |
| C | 0.25181  | -1.49609 | 0.05241  |
| N | 0.66447  | -0.12523 | -0.24678 |
| O | -1.08757 | 0.95985  | 0.95230  |
| O | -1.66480 | 0.63601  | -0.41218 |
| H | 0.07082  | 1.83486  | -0.57984 |
| H | -0.30073 | -1.49267 | 0.99354  |
| H | 1.14626  | -2.11229 | 0.17715  |
| H | -0.38710 | -1.93860 | -0.72360 |
| H | 1.25780  | -0.04031 | -1.06399 |

val+05\_84

|   |          |          |          |
|---|----------|----------|----------|
| C | -0.54184 | 0.63146  | -0.17222 |
| C | 0.81232  | 0.96114  | 0.35733  |
| N | 0.63803  | 0.00511  | -0.73643 |
| O | 0.42639  | -2.13138 | -0.04034 |
| O | -0.69761 | -2.20561 | 0.48217  |
| H | -1.17357 | -0.05935 | 0.39272  |
| H | -1.07871 | 1.36624  | -0.76821 |
| H | 1.24550  | 1.93395  | 0.13262  |
| H | 1.13812  | 0.51359  | 1.29251  |
| H | 0.90538  | 0.34455  | -1.65824 |

val+05\_85

|   |          |          |          |
|---|----------|----------|----------|
| C | -0.58292 | 1.49743  | -0.40742 |
| C | 1.11213  | -1.69051 | 0.66297  |
| N | -1.27800 | 0.36644  | -0.95560 |
| O | 0.16258  | 0.68179  | -1.27007 |
| O | 0.00099  | -1.50454 | 1.11257  |
| H | -0.87536 | 2.47244  | -0.79887 |
| H | -0.28275 | 1.48474  | 0.64280  |
| H | 1.45487  | -1.19725 | -0.26265 |
| H | 1.83214  | -2.36359 | 1.17005  |
| H | -1.17556 | -0.38884 | -0.26347 |

val+05\_86

|   |          |          |          |
|---|----------|----------|----------|
| C | 0.20678  | -0.85628 | -0.65948 |
| C | 0.52931  | 0.55444  | -0.23485 |
| N | -0.72240 | 1.27297  | 0.00802  |
| O | 1.21100  | -1.81487 | -0.54027 |
| O | -0.00145 | -1.79872 | 0.35315  |
| H | 1.05429  | 1.04522  | -1.06412 |
| H | 1.22455  | 0.49626  | 0.61711  |
| H | -0.54369 | 2.27024  | 0.09525  |
| H | -0.45224 | -0.95552 | -1.52602 |
| H | -1.12605 | 0.97176  | 0.89310  |

val+05\_88

|   |          |          |          |
|---|----------|----------|----------|
| C | 0.29161  | -0.17544 | 0.44555  |
| C | -0.58983 | 0.89463  | -0.15034 |
| N | 0.42138  | -1.34322 | -0.32612 |
| O | 1.40199  | 0.28753  | 1.19737  |
| O | 0.19817  | -0.39160 | 1.81721  |
| H | -0.16973 | 1.25974  | -1.09461 |
| H | -1.58816 | 0.49331  | -0.34831 |
| H | -0.66156 | 1.72835  | 0.54949  |
| H | 1.13732  | -1.95479 | 0.05580  |
| H | 0.60420  | -1.15160 | -1.30605 |

Supplementary Material (ESI) for PCCP  
This journal is © the Owner Societies 2011

|          |          |          |          |
|----------|----------|----------|----------|
| val+05_8 |          |          |          |
| C        | 0.40465  | 1.58792  | 0.06109  |
| C        | -0.77840 | 1.78637  | -0.47455 |
| N        | 0.53796  | -1.28879 | -0.24836 |
| O        | 1.46573  | 1.44846  | 0.54640  |
| O        | -0.11052 | -2.48428 | -0.68722 |
| H        | -1.32940 | 0.93240  | -0.84522 |
| H        | -1.18094 | 2.78974  | -0.53640 |
| H        | 0.75106  | -1.39546 | 0.74603  |
| H        | 1.43290  | -1.22072 | -0.73838 |
| H        | 0.48676  | -3.23253 | -0.50070 |

|           |          |          |          |
|-----------|----------|----------|----------|
| val+05_90 |          |          |          |
| C         | -0.09695 | -0.24064 | -0.41072 |
| C         | -0.81119 | 1.03614  | -0.10824 |
| N         | 0.62206  | 0.81981  | 0.36892  |
| O         | 1.61517  | 1.50698  | -0.13685 |
| O         | -0.42447 | -1.38176 | 0.30166  |
| H         | 0.37395  | -0.37645 | -1.38188 |
| H         | -1.58349 | 1.02346  | 0.65692  |
| H         | -0.85727 | 1.81221  | -0.86260 |
| H         | 0.65252  | 0.56426  | 1.37144  |
| H         | -1.38064 | -1.53473 | 0.22606  |

|           |          |          |          |
|-----------|----------|----------|----------|
| val+05_91 |          |          |          |
| C         | -0.60150 | 1.20375  | -0.47589 |
| C         | 0.59523  | 0.97651  | 0.42464  |
| N         | -0.11120 | -0.16938 | -0.20011 |
| O         | 0.39839  | -0.95153 | -1.07420 |
| O         | -0.99526 | -0.83087 | 0.80646  |
| H         | -1.55159 | 1.46177  | -0.02203 |
| H         | -0.43495 | 1.50792  | -1.50303 |
| H         | 0.46583  | 1.07859  | 1.49613  |
| H         | 1.59081  | 1.12325  | 0.02141  |
| H         | -0.90445 | -1.74260 | 0.46841  |

|           |          |          |          |
|-----------|----------|----------|----------|
| val+05_92 |          |          |          |
| C         | 0.55696  | 1.34289  | -0.26851 |
| C         | -0.86716 | 1.35075  | 0.08575  |
| N         | -0.20059 | 0.36928  | -0.88762 |
| O         | 1.65969  | 1.81412  | -0.23527 |
| O         | -0.93827 | -1.59596 | 1.20991  |
| H         | -1.47822 | 2.15674  | -0.32072 |
| H         | -1.25505 | 0.84590  | 0.96683  |
| H         | -0.60281 | -1.28985 | 0.34703  |
| H         | -0.38423 | 0.42415  | -1.88884 |
| H         | -0.13701 | -1.84392 | 1.69473  |

|           |          |          |          |
|-----------|----------|----------|----------|
| val+05_93 |          |          |          |
| C         | 0.42446  | 0.55898  | 0.26950  |
| C         | -0.76248 | 0.93847  | -0.18651 |
| N         | -0.06821 | -2.14369 | -0.10272 |
| O         | 1.49938  | 0.32997  | 0.68858  |
| O         | -1.01842 | 2.30772  | -0.32214 |
| H         | -1.46825 | 0.20160  | -0.54632 |
| H         | -0.78109 | -2.83205 | -0.34118 |
| H         | 0.70207  | -2.28758 | -0.75402 |
| H         | 0.29004  | -2.40205 | 0.81546  |
| H         | -1.56951 | 2.58003  | 0.43004  |

|           |          |          |          |
|-----------|----------|----------|----------|
| val+05_94 |          |          |          |
| C         | 0.63464  | 0.22120  | -0.25310 |
| C         | 1.42440  | -0.79466 | 0.06207  |
| N         | -0.60034 | 0.49655  | 0.48087  |
| O         | -0.71440 | 1.71192  | 0.87927  |
| O         | -1.72786 | 0.07933  | -0.50070 |
| H         | 0.80638  | 0.97569  | -1.00944 |
| H         | 2.35888  | -0.95569 | -0.46408 |
| H         | 1.17504  | -1.49854 | 0.85253  |
| H         | -0.75770 | -0.22306 | 1.21015  |
| H         | -2.15075 | 0.95837  | -0.56767 |

|           |          |          |          |
|-----------|----------|----------|----------|
| val+05_95 |          |          |          |
| C         | 1.82402  | -0.40127 | -0.05787 |
| C         | -0.04918 | 0.95162  | -0.20218 |
| N         | 0.42244  | -0.23109 | -0.14203 |
| O         | 2.54518  | 0.18957  | 0.71230  |

Supplementary Material (ESI) for PCCP  
This journal is © the Owner Societies 2011

|   |          |          |          |
|---|----------|----------|----------|
| O | -2.36060 | -1.13029 | -0.27600 |
| H | 2.18688  | -1.19075 | -0.73942 |
| H | -1.13205 | 1.07114  | -0.21871 |
| H | 0.58754  | 1.84166  | -0.24774 |
| H | -1.39245 | -1.24783 | -0.29195 |
| H | -2.60769 | -1.39196 | 0.62341  |

|           |          |          |          |
|-----------|----------|----------|----------|
| val+05_96 |          |          |          |
| C         | 0.46871  | 0.79819  | -0.22401 |
| C         | 1.18876  | -0.31646 | -0.05942 |
| N         | -0.93514 | 0.80806  | -0.33938 |
| O         | -1.48252 | 1.81867  | 0.54599  |
| O         | 0.56427  | -1.54570 | 0.04119  |
| H         | 0.95166  | 1.75732  | -0.37189 |
| H         | 2.27532  | -0.31152 | -0.09578 |
| H         | -2.03470 | 2.33754  | -0.06085 |
| H         | -1.30820 | -0.07740 | 0.00458  |
| H         | 1.12764  | -2.14160 | 0.55618  |

|           |          |          |          |
|-----------|----------|----------|----------|
| val+05_97 |          |          |          |
| C         | 0.34798  | -0.03459 | -0.61531 |
| C         | 1.02629  | -0.96109 | 0.24998  |
| N         | -0.98686 | 0.10097  | -0.51739 |
| O         | 2.23599  | -1.14005 | 0.28347  |
| O         | -1.79825 | 1.30135  | 0.57955  |
| H         | 0.88459  | 0.65331  | -1.25655 |
| H         | 0.33901  | -1.56104 | 0.89964  |
| H         | -1.49363 | 0.51286  | -1.29203 |
| H         | -1.49756 | -0.65620 | -0.07205 |
| H         | -1.00767 | 1.59287  | 1.06909  |

|           |          |          |          |
|-----------|----------|----------|----------|
| val+05_98 |          |          |          |
| C         | 1.25491  | 0.31327  | -0.07308 |
| C         | -0.59944 | 1.92796  | -0.03851 |
| N         | -0.09083 | 0.63638  | -0.00967 |
| O         | -1.77877 | 2.18777  | 0.01795  |
| O         | 1.68224  | -0.81914 | -0.04638 |
| H         | 1.90237  | 1.20514  | -0.15121 |
| H         | 0.19432  | 2.69274  | -0.11885 |
| H         | -0.75741 | -0.12807 | 0.06352  |
| H         | -0.64367 | -3.18508 | 0.21868  |
| H         | -0.05303 | -2.73628 | 0.15804  |

|           |          |          |          |
|-----------|----------|----------|----------|
| val+05_99 |          |          |          |
| C         | 0.40241  | 0.17003  | -0.06611 |
| C         | 1.30870  | -0.79535 | 0.09589  |
| N         | -0.98054 | -0.10794 | -0.19708 |
| O         | -1.76324 | 0.77938  | 0.61302  |
| O         | 0.67256  | 1.51901  | -0.16609 |
| H         | 2.37526  | -0.59013 | 0.09924  |
| H         | 0.97869  | -1.81806 | 0.21812  |
| H         | -1.39033 | 1.66973  | 0.46056  |
| H         | -1.27535 | 0.05416  | -1.16318 |
| H         | 1.57974  | 1.68896  | 0.13264  |

|          |          |          |          |
|----------|----------|----------|----------|
| val+05_9 |          |          |          |
| C        | 0.50382  | -0.21909 | -0.96978 |
| C        | -0.18026 | 0.92575  | -0.56959 |
| N        | 0.50025  | -1.33423 | -0.00140 |
| O        | -0.41313 | 1.97306  | -1.16535 |
| O        | -0.64024 | 0.79394  | 0.78471  |
| H        | -0.06096 | -2.15889 | -0.26838 |
| H        | 1.43401  | -1.68368 | 0.25355  |
| H        | 0.06799  | -0.92724 | 0.84626  |
| H        | 0.83504  | -0.44137 | -1.96968 |
| H        | -1.06622 | 1.64725  | 0.96756  |

|            |          |          |          |
|------------|----------|----------|----------|
| val+07_100 |          |          |          |
| C          | -1.03013 | 0.76867  | 0.07804  |
| C          | 0.27292  | 0.83319  | -0.16424 |
| N          | 0.73164  | -1.82501 | 0.47748  |
| O          | 1.41238  | 0.99651  | -0.40606 |
| O          | -1.81789 | 1.89010  | -0.20580 |
| H          | 1.56158  | -1.60612 | 1.02647  |
| H          | -1.48131 | -0.16628 | 0.38273  |
| H          | 1.06977  | -2.09598 | -0.44472 |
| H          | 0.32051  | -2.66059 | 0.89182  |



Supplementary Material (ESI) for PCCP  
This journal is © the Owner Societies 2011

|            |          |          |          |
|------------|----------|----------|----------|
| H          | -2.00067 | 2.34172  | 0.63458  |
| val+07_101 |          |          |          |
| C          | 0.12994  | 0.39209  | 0.09385  |
| C          | -0.82934 | 1.30167  | 0.10816  |
| N          | -0.22071 | -1.05791 | -0.02340 |
| O          | -1.52689 | -1.34410 | -0.10922 |
| O          | 1.48654  | 0.49265  | 0.16835  |
| H          | -1.84151 | 0.92236  | 0.03122  |
| H          | -0.62897 | 2.36379  | 0.19093  |
| H          | 0.33395  | -1.39700 | -0.84127 |
| H          | 0.25121  | -1.50954 | 0.79202  |
| H          | 1.73308  | 1.42819  | 0.24245  |
| val+07_102 |          |          |          |
| C          | 0.64706  | -0.13584 | 0.00726  |
| C          | -0.50405 | 0.53283  | -0.04351 |
| N          | 0.58078  | -1.61657 | -0.17576 |
| O          | -0.64986 | -2.12692 | -0.37779 |
| O          | -0.67860 | 1.86858  | 0.09526  |
| H          | 1.63905  | 0.27821  | 0.16875  |
| H          | -1.42145 | -0.01982 | -0.21281 |
| H          | 1.23019  | -1.83999 | -0.95934 |
| H          | 1.04386  | -2.03194 | 0.66011  |
| H          | 0.17942  | 2.29946  | 0.24313  |
| val+07_103 |          |          |          |
| C          | 0.78830  | 1.11913  | -0.62903 |
| C          | -0.57090 | 1.15579  | 0.05056  |
| N          | 0.18107  | -0.08014 | -0.18271 |
| O          | -0.25928 | -1.05905 | -1.15360 |
| O          | 0.63336  | -0.80908 | 0.95132  |
| H          | 1.64639  | 1.37678  | -0.00987 |
| H          | -1.46622 | 1.28155  | -0.56026 |
| H          | -0.72272 | 1.34055  | 1.11868  |
| H          | 0.25656  | -0.75333 | -1.92877 |
| H          | -0.06206 | -1.48190 | 1.08808  |
| val+07_104 |          |          |          |
| C          | 0.37134  | 0.04754  | 0.10903  |
| C          | -0.67556 | 0.94581  | -0.46442 |
| N          | -1.01545 | -0.00684 | 0.67811  |
| O          | -1.29826 | 0.44401  | 1.87434  |
| O          | 0.76483  | -1.07142 | -0.60497 |
| H          | 1.06597  | 0.43615  | 0.85049  |
| H          | -1.08621 | 0.69800  | -1.44018 |
| H          | -0.72822 | 1.97791  | -0.13958 |
| H          | -1.50765 | -0.84974 | 0.33389  |
| H          | 1.04090  | -0.79472 | -1.49411 |
| val+07_105 |          |          |          |
| C          | 0.60335  | 0.33049  | 0.35449  |
| C          | -0.53528 | 1.08103  | -0.30496 |
| N          | -0.74321 | -0.28305 | 0.24099  |
| O          | -1.50208 | -0.56495 | 1.23100  |
| O          | -0.75532 | -1.27853 | -0.87299 |
| H          | 0.86741  | 0.57141  | 1.37800  |
| H          | 1.37129  | -0.10564 | -0.27425 |
| H          | -1.06001 | 1.84179  | 0.26177  |
| H          | -0.54844 | 1.15998  | -1.38611 |
| H          | -1.38970 | -1.90334 | -0.47175 |
| val+07_106 |          |          |          |
| C          | 0.40782  | -0.56917 | 0.45564  |
| C          | 1.50232  | 0.13541  | 0.21910  |
| N          | -0.83779 | -0.26403 | -0.28583 |
| O          | -0.81152 | 0.71021  | -1.10548 |
| O          | -1.88131 | -0.08671 | 0.88314  |
| H          | 1.48197  | 0.92582  | -0.52321 |
| H          | 2.41803  | -0.06424 | 0.76436  |
| H          | -1.24936 | -1.13637 | -0.66241 |
| H          | 0.28894  | -1.37633 | 1.16831  |
| H          | -1.91908 | 0.88921  | 0.85677  |
| val+07_107 |          |          |          |
| C          | 3.07641  | -0.68082 | -1.44404 |
| C          | -0.08019 | 0.64201  | 0.68128  |

Supplementary Material (ESI) for PCCP  
 This journal is © the Owner Societies 2011

|   |          |          |          |
|---|----------|----------|----------|
| N | -0.10988 | -0.43171 | 0.00141  |
| O | 4.10271  | -0.80790 | -1.91396 |
| O | -2.77895 | -1.00600 | 0.89293  |
| H | 0.78476  | 1.31400  | 0.75096  |
| H | -0.97582 | 0.91961  | 1.24026  |
| H | -1.89394 | -1.12606 | 0.49033  |
| H | 0.78080  | -0.60045 | -0.47701 |
| H | -3.32791 | -0.73176 | 0.14373  |

val+07\_109

|   |          |          |          |
|---|----------|----------|----------|
| C | -0.94049 | 0.32763  | 0.45915  |
| C | 0.38972  | 0.29360  | 0.47496  |
| N | -1.73803 | -0.73437 | -0.17478 |
| O | -2.67968 | -0.21516 | -1.00221 |
| O | 1.07085  | -0.82032 | 0.04781  |
| H | 0.98034  | 1.12626  | 0.84931  |
| H | -1.54441 | 1.15732  | 0.79561  |
| H | -2.14584 | -1.32887 | 0.57807  |
| H | -1.06353 | -1.35977 | -0.65984 |
| H | 1.97277  | -0.57202 | -0.20270 |

val+07\_10

|   |          |          |          |
|---|----------|----------|----------|
| C | 0.58763  | 0.78506  | -0.27198 |
| C | -0.55897 | 1.54183  | 0.08089  |
| N | 0.61063  | -0.45309 | 0.34195  |
| O | -1.41438 | 1.13276  | 0.88842  |
| O | 0.16918  | -1.74894 | -0.48199 |
| H | -0.64575 | 2.54720  | -0.37287 |
| H | 1.36144  | 1.04452  | -0.97855 |
| H | -0.10854 | -0.41761 | 1.08754  |
| H | 1.50546  | -0.82502 | 0.65483  |
| H | -0.51670 | -1.34870 | -1.05004 |

val+07\_110

|   |          |          |          |
|---|----------|----------|----------|
| C | 1.07527  | -1.78683 | -0.21149 |
| C | -0.22223 | 1.08834  | -0.56871 |
| N | -1.32426 | 0.09832  | 0.12302  |
| O | 2.18379  | -2.02131 | -0.32018 |
| O | 0.80861  | 1.06189  | 0.42987  |
| H | 0.14233  | 0.37195  | -1.33634 |
| H | -1.71708 | 0.58663  | 0.92655  |
| H | -2.08058 | -0.07410 | -0.54182 |
| H | -0.93776 | -0.80486 | 0.44992  |
| H | 0.81542  | 1.95105  | 0.80909  |

val+07\_111

|   |          |          |          |
|---|----------|----------|----------|
| C | 0.26762  | 0.98060  | -0.22825 |
| C | -0.93120 | 1.18910  | 0.26777  |
| N | 0.33848  | -1.87094 | 0.04131  |
| O | 1.65719  | -2.01495 | -0.51450 |
| O | 1.34784  | 0.88113  | -0.68464 |
| H | -1.52082 | 0.35155  | 0.61058  |
| H | -1.31147 | 2.20203  | 0.32540  |
| H | -0.23877 | -2.48739 | -0.53449 |
| H | 0.40470  | -2.33106 | 0.95163  |
| H | 1.89344  | -1.09137 | -0.71411 |

val+07\_112

|   |          |          |          |
|---|----------|----------|----------|
| C | -0.09957 | 2.39788  | 0.06369  |
| C | -0.50110 | -1.19376 | 0.08400  |
| N | 0.66288  | -0.30110 | 0.07386  |
| O | -1.21419 | 2.12899  | 0.29900  |
| O | 0.98668  | 2.76416  | -0.17100 |
| H | -0.26626 | -2.27026 | 0.12761  |
| H | -1.13165 | -0.94672 | 0.94381  |
| H | 1.24010  | -0.47279 | 0.89539  |
| H | -1.09709 | -1.01325 | -0.81626 |
| H | 1.25459  | -0.50565 | -0.72950 |

val+07\_113

|   |          |          |          |
|---|----------|----------|----------|
| C | -0.20594 | -0.01653 | -0.44633 |
| C | 0.47581  | 0.95162  | 0.33520  |
| N | -0.09062 | -1.29094 | 0.07333  |
| O | 0.97238  | -2.30991 | -0.55813 |
| O | 1.06977  | 0.66788  | 1.39218  |
| H | -0.71570 | 0.13151  | -1.38637 |
| H | 0.42621  | 1.99776  | -0.02183 |

Supplementary Material (ESI) for PCCP  
This journal is © the Owner Societies 2011

|   |          |          |          |
|---|----------|----------|----------|
| H | 0.27057  | -1.18026 | 1.03793  |
| H | 1.67603  | -1.67609 | -0.79547 |
| H | -0.88931 | -1.91875 | 0.00560  |

|            |          |          |          |
|------------|----------|----------|----------|
| val+07_114 |          |          |          |
| C          | 0.49415  | 2.10323  | 0.88994  |
| C          | -0.26469 | -1.48680 | 0.30787  |
| N          | -0.32511 | -0.77709 | -0.84152 |
| O          | 0.00284  | -1.02966 | 1.41179  |
| O          | 0.29211  | 2.08597  | -0.30926 |
| H          | 0.75472  | 3.04914  | 1.40500  |
| H          | -0.48708 | -2.56166 | 0.16012  |
| H          | 0.42541  | 1.18592  | 1.49961  |
| H          | -0.55312 | -1.23063 | -1.71369 |
| H          | -0.13834 | 0.22748  | -0.83176 |

|            |          |          |          |
|------------|----------|----------|----------|
| val+07_115 |          |          |          |
| C          | 0.44749  | 0.72639  | 0.17212  |
| C          | -0.93303 | 0.72435  | 0.45546  |
| N          | 1.29975  | -0.15017 | -0.36199 |
| O          | -0.83810 | -2.02366 | 0.13550  |
| O          | 0.66393  | 1.82187  | 0.75843  |
| H          | -1.48356 | 1.34872  | -0.25993 |
| H          | 2.28902  | -0.04655 | -0.17336 |
| H          | -1.64072 | -2.24593 | -0.36015 |
| H          | 0.91590  | -1.07964 | -0.52538 |
| H          | -1.10617 | -1.26918 | 0.71090  |

|            |          |          |          |
|------------|----------|----------|----------|
| val+07_117 |          |          |          |
| C          | 0.71734  | 0.93245  | -0.13324 |
| C          | -0.67129 | 0.78986  | -0.30943 |
| N          | 0.37653  | -2.17759 | 0.11742  |
| O          | 0.77512  | 2.10148  | -0.57582 |
| O          | 1.71799  | 0.15176  | 0.16839  |
| H          | -1.22214 | 1.24208  | 0.52649  |
| H          | 1.33142  | -0.78231 | 0.30751  |
| H          | 0.83227  | -2.89160 | -0.44916 |
| H          | -0.02100 | -2.64404 | 0.93109  |
| H          | -0.39885 | -1.80297 | -0.43423 |

|            |          |          |          |
|------------|----------|----------|----------|
| val+07_119 |          |          |          |
| C          | -0.85192 | 0.10085  | 0.35409  |
| C          | -0.11968 | 1.35729  | -0.00436 |
| N          | -0.81524 | -0.98752 | -0.39731 |
| O          | -0.29984 | 2.23001  | -0.82413 |
| O          | 0.77294  | 1.03070  | 0.85145  |
| H          | -1.33372 | 0.02212  | 1.32158  |
| H          | 2.74805  | -0.27000 | -0.14380 |
| H          | -0.42138 | -0.94250 | -1.32994 |
| H          | 3.24983  | -0.71575 | -0.46587 |
| H          | -0.96663 | -1.91251 | -0.01379 |

|           |          |          |          |
|-----------|----------|----------|----------|
| val+07_11 |          |          |          |
| C         | 2.14146  | -0.83432 | -1.33056 |
| C         | -0.66187 | 1.04257  | -0.10440 |
| N         | 0.11253  | 0.28140  | 0.87248  |
| O         | -0.87724 | 0.27316  | -1.25972 |
| O         | 3.08867  | -1.21353 | -0.82885 |
| H         | -1.66663 | 1.33635  | 0.23554  |
| H         | -0.09444 | 1.96508  | -0.31282 |
| H         | -0.45999 | -0.46486 | 1.26439  |
| H         | 0.41212  | 0.87655  | 1.64324  |
| H         | -0.00121 | -0.05270 | -1.53241 |

|            |          |          |          |
|------------|----------|----------|----------|
| val+07_120 |          |          |          |
| C          | 0.44372  | 0.17778  | -0.82544 |
| C          | -0.77457 | 0.83038  | -0.27346 |
| N          | 0.79612  | -1.13233 | -0.04933 |
| O          | 0.09693  | -1.37687 | 1.05921  |
| O          | 1.16029  | 0.49484  | -1.73310 |
| H          | -0.68259 | 0.86305  | 0.81596  |
| H          | -1.64498 | 0.19328  | -0.46959 |
| H          | -0.90766 | 1.81412  | -0.72393 |
| H          | 1.83002  | -1.05445 | 0.08712  |
| H          | 0.70944  | -1.87359 | -0.78384 |

val+07\_121

Supplementary Material (ESI) for PCCP  
This journal is © the Owner Societies 2011

|   |          |          |          |
|---|----------|----------|----------|
| C | -0.02917 | 1.23017  | -0.51227 |
| C | 0.29098  | -1.24726 | -0.22239 |
| N | -0.28081 | 0.01452  | 0.31065  |
| O | -1.64882 | 0.10963  | 0.15335  |
| O | 0.43574  | 1.17912  | -1.61786 |
| H | -0.40708 | 2.10980  | 0.01920  |
| H | -0.20110 | -2.06173 | 0.30960  |
| H | 1.37415  | -1.26521 | -0.06737 |
| H | 0.05105  | -1.28287 | -1.28267 |
| H | 0.01126  | 0.13412  | 1.29587  |

val+07\_122

|   |          |          |          |
|---|----------|----------|----------|
| C | 0.45786  | 0.61985  | -0.30135 |
| C | -0.32897 | 1.41124  | 0.70249  |
| N | -0.06484 | -1.84108 | 0.28067  |
| O | 1.24080  | -2.06369 | -0.27182 |
| O | -0.59720 | 1.23997  | -0.73507 |
| H | -1.04038 | 0.90325  | 1.34449  |
| H | -0.01916 | 2.41652  | 0.97251  |
| H | 1.46857  | -1.14177 | -0.52479 |
| H | -0.03224 | -2.29243 | 1.19683  |
| H | -0.69264 | -2.41007 | -0.29125 |

val+07\_124

|   |          |          |          |
|---|----------|----------|----------|
| C | -0.22629 | -0.10970 | 0.25749  |
| C | 0.37837  | 1.05720  | -0.47839 |
| N | -0.03695 | -1.28026 | -0.20597 |
| O | -0.59082 | -2.35083 | 0.46284  |
| O | 1.11222  | 0.67991  | -1.61696 |
| H | -0.81159 | 0.08649  | 1.16580  |
| H | -0.43418 | 1.74900  | -0.75941 |
| H | 1.02602  | 1.61261  | 0.22057  |
| H | -1.07652 | -2.01394 | 1.24608  |
| H | 1.03932  | -0.28769 | -1.69365 |

val+07\_125

|   |          |          |          |
|---|----------|----------|----------|
| C | 0.93414  | 1.26025  | 0.50175  |
| C | -0.78570 | 0.59062  | 0.26538  |
| N | 0.58925  | 0.10571  | 0.04893  |
| O | -0.80201 | -2.30484 | -0.51911 |
| O | -0.24500 | 1.88366  | 0.76429  |
| H | 1.89823  | 1.73186  | 0.67601  |
| H | -1.34160 | 0.06846  | 1.04427  |
| H | -1.37401 | 0.73792  | -0.64123 |
| H | -0.77888 | -2.45183 | -1.47621 |
| H | 0.01609  | -1.80361 | -0.34458 |

val+07\_128

|   |          |          |          |
|---|----------|----------|----------|
| C | -1.03001 | 0.89930  | -0.05681 |
| C | 0.46075  | 0.58839  | -0.02141 |
| N | 0.82542  | -0.71075 | -0.56943 |
| O | 0.40535  | -1.70098 | 0.40480  |
| O | -1.81684 | 0.27940  | -0.73640 |
| H | -1.35775 | 1.77130  | 0.55231  |
| H | 0.96790  | 1.37090  | -0.60992 |
| H | 0.84421  | 0.66445  | 1.00128  |
| H | 0.18507  | -0.88908 | -1.34767 |
| H | 1.23121  | -2.18513 | 0.56297  |

val+07\_129

|   |          |          |          |
|---|----------|----------|----------|
| C | -0.84272 | -0.18558 | -1.21239 |
| C | 0.06742  | -0.20330 | -0.06569 |
| N | 0.76166  | 0.98025  | 0.31417  |
| O | 1.01935  | 0.91665  | 1.73591  |
| O | -1.35280 | -0.29522 | 0.12807  |
| H | -1.05608 | 0.75716  | -1.71959 |
| H | 0.62220  | -1.10386 | 0.18876  |
| H | -0.94635 | -1.07252 | -1.83810 |
| H | 0.12584  | 1.77415  | 0.21676  |
| H | 1.98248  | 1.03127  | 1.77290  |

val+07\_12

|   |          |          |          |
|---|----------|----------|----------|
| C | 0.34486  | 1.72945  | 2.13304  |
| C | 0.14459  | -0.77347 | -0.43203 |
| N | -0.34281 | 0.56230  | -0.76601 |
| O | 0.38955  | 2.86490  | 2.09498  |
| O | -0.30096 | -1.14752 | 0.84647  |

Supplementary Material (ESI) for PCCP  
This journal is © the Owner Societies 2011

|   |          |          |          |
|---|----------|----------|----------|
| H | -0.20803 | -1.57140 | -1.10314 |
| H | 1.24480  | -0.73809 | -0.50072 |
| H | -1.34784 | 0.53399  | -0.93164 |
| H | 0.09933  | 0.90920  | -1.61584 |
| H | -0.05610 | -0.41605 | 1.44058  |

val+07\_131

|   |          |          |          |
|---|----------|----------|----------|
| C | -0.14239 | -0.13460 | -0.67111 |
| C | 1.13469  | 0.20189  | -0.10282 |
| N | -1.09954 | -0.65097 | 0.12072  |
| O | 2.06479  | 0.71473  | -0.70979 |
| O | -2.32097 | 0.35751  | 1.01127  |
| H | 1.23922  | -0.07989 | 0.97612  |
| H | -0.40838 | 0.12969  | -1.68687 |
| H | -0.79943 | -1.06809 | 0.99736  |
| H | -1.87026 | -1.15029 | -0.30728 |
| H | -1.93243 | 1.23252  | 0.82940  |

val+07\_132

|   |          |          |          |
|---|----------|----------|----------|
| C | 0.07004  | -1.59424 | -1.19700 |
| C | -1.41618 | 1.31957  | 1.32430  |
| N | -0.53294 | -0.73896 | -0.48072 |
| O | -2.59432 | 1.31097  | 1.05449  |
| O | 1.39779  | -1.79736 | -1.11297 |
| H | -0.69001 | 1.97212  | 0.79910  |
| H | -1.53319 | -0.72214 | -0.67914 |
| H | -0.36394 | -2.25955 | -1.94790 |
| H | -0.98378 | 0.68407  | 2.12314  |
| H | 1.72934  | -1.18089 | -0.43221 |

val+07\_134

|   |          |          |          |
|---|----------|----------|----------|
| C | -0.79320 | -0.81827 | -0.33463 |
| C | 0.29922  | -0.03739 | 0.00515  |
| N | -2.00827 | -0.12985 | 0.12528  |
| O | 0.17794  | 1.07934  | 0.59222  |
| O | 1.54093  | -0.50441 | -0.31609 |
| H | -1.53278 | 0.73686  | 0.53715  |
| H | -2.66799 | 0.15457  | -0.60900 |
| H | -2.54611 | -0.60730 | 0.85946  |
| H | -0.86103 | -1.78797 | -0.79461 |
| H | 2.14577  | 0.18822  | 0.00108  |

val+07\_135

|   |          |          |          |
|---|----------|----------|----------|
| C | 0.35592  | 0.13449  | -0.28718 |
| C | -0.98005 | -0.53768 | -0.29396 |
| N | 1.25615  | -0.13238 | 0.62615  |
| O | 1.19622  | -0.97596 | 1.57154  |
| O | -2.02864 | 0.38662  | -0.57535 |
| H | -1.11509 | -1.06045 | 0.66156  |
| H | -1.03466 | -1.28762 | -1.09233 |
| H | 2.13021  | 0.41503  | 0.56472  |
| H | 0.61408  | 0.88955  | -1.02113 |
| H | -2.08173 | 0.99802  | 0.17599  |

val+07\_136

|   |          |          |          |
|---|----------|----------|----------|
| C | 0.39028  | -0.03272 | 1.09737  |
| C | 1.35085  | 0.25467  | -0.03205 |
| N | -0.85973 | -0.60039 | 0.58972  |
| O | -1.01225 | 0.75714  | 0.76334  |
| O | -1.19910 | -1.06146 | -0.72463 |
| H | 2.04784  | -0.59125 | -0.10073 |
| H | 1.94388  | 1.13125  | 0.24723  |
| H | 0.93534  | 0.44246  | -1.03609 |
| H | -1.43474 | -1.17822 | 1.20663  |
| H | -0.97006 | -0.28819 | -1.27429 |

val+07\_137

|   |          |          |          |
|---|----------|----------|----------|
| C | 0.08125  | -1.51850 | 0.92036  |
| C | -1.40199 | 0.86106  | -0.48149 |
| N | -0.56781 | -0.25566 | -0.92587 |
| O | 0.40777  | -0.49384 | 0.13537  |
| O | 1.07035  | -1.67314 | 1.78385  |
| H | -2.16204 | 1.01523  | -1.25480 |
| H | -1.89352 | 0.68422  | 0.48621  |
| H | -0.78661 | 1.76220  | -0.41629 |
| H | -1.12678 | -1.11460 | -0.88231 |
| H | 1.78599  | -1.00896 | 1.63517  |

Supplementary Material (ESI) for PCCP  
This journal is © the Owner Societies 2011

|            |          |          |          |
|------------|----------|----------|----------|
| val+07_138 |          |          |          |
| C          | 0.83050  | -0.83061 | -0.29010 |
| C          | -0.75028 | 1.20746  | 0.37028  |
| N          | -0.44971 | -0.17101 | -0.03886 |
| O          | -0.15887 | -0.32282 | -1.39399 |
| O          | -1.46662 | -1.01309 | 0.43865  |
| H          | 1.58214  | -0.02024 | -0.22110 |
| H          | -0.00072 | 1.85099  | -0.08677 |
| H          | -0.70909 | 1.25757  | 1.45984  |
| H          | -1.75067 | 1.46196  | 0.01372  |
| H          | -0.98228 | -1.86990 | 0.42644  |

|            |          |          |          |
|------------|----------|----------|----------|
| val+07_139 |          |          |          |
| C          | 0.70531  | -1.81889 | -0.73638 |
| C          | -0.66614 | 0.16887  | 0.52124  |
| N          | -0.43773 | -1.24411 | 0.06824  |
| O          | -0.67808 | -1.36633 | -1.31887 |
| O          | -0.04695 | 1.05636  | -0.33246 |
| H          | 1.31676  | -0.91183 | -0.91831 |
| H          | -0.22905 | 0.27523  | 1.51811  |
| H          | -1.75862 | 0.29708  | 0.57180  |
| H          | -0.97565 | -1.93289 | 0.59752  |
| H          | -0.34334 | 0.81620  | -1.23100 |

|           |          |          |          |
|-----------|----------|----------|----------|
| val+07_13 |          |          |          |
| C         | -0.84812 | -1.28263 | -0.54375 |
| C         | 0.04170  | 2.07684  | 1.59968  |
| N         | 0.01983  | -0.76277 | -1.42508 |
| O         | 0.99352  | 1.50079  | 1.11539  |
| O         | -0.54819 | -0.92424 | 0.71245  |
| H         | -0.93675 | 1.57970  | 1.72787  |
| H         | 0.11412  | 3.12887  | 1.93415  |
| H         | -0.10310 | -0.97566 | -2.40411 |
| H         | 0.82235  | -0.16719 | -1.18999 |
| H         | 0.23905  | -0.32700 | 0.78599  |

|            |          |          |          |
|------------|----------|----------|----------|
| val+07_140 |          |          |          |
| C          | 2.05360  | -1.14180 | 0.75874  |
| C          | -0.63001 | 0.64951  | -0.88075 |
| N          | -0.55976 | -0.25174 | 0.27436  |
| O          | 1.75370  | -1.64168 | 1.77335  |
| O          | 2.44844  | -0.67421 | -0.23898 |
| H          | -0.23005 | 0.13392  | -1.75947 |
| H          | -1.63971 | 1.01719  | -1.12822 |
| H          | -0.92077 | 0.21405  | 1.10508  |
| H          | -1.16276 | -1.05878 | 0.12396  |
| H          | 0.01112  | 1.51725  | -0.69586 |

|            |          |          |          |
|------------|----------|----------|----------|
| val+07_141 |          |          |          |
| C          | 0.60704  | -1.28464 | -0.03669 |
| C          | -1.19948 | 1.75218  | -0.04403 |
| N          | -0.35617 | -2.14442 | 0.15498  |
| O          | -2.11156 | 2.54245  | -0.07166 |
| O          | -1.11269 | 0.67699  | -0.82802 |
| H          | 1.57294  | -1.77109 | 0.17896  |
| H          | -0.34053 | 1.85917  | 0.65118  |
| H          | -0.27052 | 0.13876  | -0.59642 |
| H          | -1.31634 | -1.84172 | -0.00828 |
| H          | -0.26029 | -3.11748 | 0.45458  |

|            |          |          |          |
|------------|----------|----------|----------|
| val+07_142 |          |          |          |
| C          | -0.64739 | 0.04858  | -0.64959 |
| C          | 1.31275  | 0.93234  | 0.32341  |
| N          | -1.72695 | -0.31818 | 0.46045  |
| O          | 2.32498  | 0.93187  | 0.97645  |
| O          | 0.56981  | -0.17714 | 0.11961  |
| H          | 0.87188  | 1.81093  | -0.18218 |
| H          | -0.70561 | -0.86553 | -1.26382 |
| H          | -1.77278 | 0.45255  | 1.12878  |
| H          | -1.56024 | -1.18165 | 1.00930  |
| H          | -2.64124 | -0.38266 | 0.00738  |

|            |          |          |          |
|------------|----------|----------|----------|
| val+07_143 |          |          |          |
| C          | -0.70010 | 0.31259  | 0.81594  |
| C          | 1.56327  | 0.39567  | -0.06597 |
| N          | -2.14977 | -0.98189 | -0.44268 |

Supplementary Material (ESI) for PCCP  
This journal is © the Owner Societies 2011

|   |          |          |          |
|---|----------|----------|----------|
| O | -0.82344 | -0.40336 | -0.30408 |
| O | 0.54609  | 0.72497  | 0.92318  |
| H | 1.67066  | -0.68771 | -0.15111 |
| H | 1.29621  | 0.81441  | -1.03904 |
| H | 2.48174  | 0.84808  | 0.30703  |
| H | -2.61160 | -0.66524 | 0.41962  |
| H | -2.55317 | -0.41451 | -1.19379 |

|            |          |          |          |
|------------|----------|----------|----------|
| val+07_144 |          |          |          |
| C          | 1.71665  | 0.64877  | -0.05283 |
| C          | -1.79669 | -0.33932 | 0.16178  |
| N          | 0.48528  | -0.12651 | -0.29625 |
| O          | 0.40695  | 1.14194  | -0.83582 |
| O          | -0.46746 | -0.42167 | 0.70109  |
| H          | 1.50689  | 1.05174  | 0.95693  |
| H          | -2.00748 | 0.67476  | -0.18688 |
| H          | -1.93855 | -1.06125 | -0.65462 |
| H          | -2.44937 | -0.60180 | 0.99575  |
| H          | 0.48256  | -0.86996 | -1.00265 |

|            |          |          |          |
|------------|----------|----------|----------|
| val+07_145 |          |          |          |
| C          | 0.69874  | -0.29522 | -0.08940 |
| C          | 1.75487  | 0.15685  | -0.46644 |
| N          | -0.52497 | -0.81029 | 0.21668  |
| O          | -1.24648 | 0.02690  | 1.14350  |
| O          | -2.79952 | 0.35925  | -1.10936 |
| H          | 2.70863  | 0.54671  | -0.73639 |
| H          | -1.99066 | 0.32938  | 0.57217  |
| H          | -2.12641 | -0.32536 | -1.28337 |
| H          | -0.45485 | -1.72173 | 0.66661  |
| H          | -2.45335 | 1.14590  | -1.55929 |

|            |          |          |          |
|------------|----------|----------|----------|
| val+07_146 |          |          |          |
| C          | 0.40553  | -0.31850 | -0.04159 |
| C          | 1.51218  | 0.14170  | -0.19317 |
| N          | -0.88526 | -0.71315 | 0.18138  |
| O          | -3.52948 | 0.51034  | 0.18033  |
| O          | 2.77215  | 0.46793  | -0.42863 |
| H          | -2.59846 | 0.40837  | 0.45573  |
| H          | -3.55778 | 1.39186  | -0.21959 |
| H          | -0.97220 | -1.45333 | 0.87411  |
| H          | -1.38990 | -0.97820 | -0.66156 |
| H          | 2.91923  | 1.39497  | -0.17300 |

|            |          |          |          |
|------------|----------|----------|----------|
| val+07_148 |          |          |          |
| C          | 0.37685  | 0.25593  | 0.29745  |
| C          | -0.95931 | 0.94249  | 0.13620  |
| N          | 0.45769  | -1.01924 | -0.19623 |
| O          | 1.34196  | 0.74420  | 0.88333  |
| O          | 1.75009  | -1.56925 | -0.22716 |
| H          | -1.33904 | 1.21491  | 1.12545  |
| H          | -0.81996 | 1.86829  | -0.43097 |
| H          | -1.70283 | 0.31766  | -0.36799 |
| H          | 2.25255  | -0.87207 | 0.25807  |
| H          | -0.05032 | -1.28053 | -1.03276 |

|           |          |          |          |
|-----------|----------|----------|----------|
| val+07_14 |          |          |          |
| C         | 0.54130  | 2.51474  | -0.58404 |
| C         | -0.75404 | -1.26428 | -0.20425 |
| N         | -0.44963 | -0.05336 | 0.55537  |
| O         | -0.17898 | 3.24261  | -1.07819 |
| O         | 0.94403  | -0.11281 | 0.92058  |
| H         | -1.83862 | -1.30122 | -0.36041 |
| H         | -0.26220 | -1.20632 | -1.17962 |
| H         | -0.42721 | -2.18649 | 0.29826  |
| H         | -0.92698 | -0.11345 | 1.45604  |
| H         | 1.28273  | 0.70638  | 0.51815  |

|            |          |          |          |
|------------|----------|----------|----------|
| val+07_150 |          |          |          |
| C          | -0.58570 | 0.88527  | 0.42510  |
| C          | 0.60438  | 0.92112  | -0.51145 |
| N          | -0.16383 | -0.33264 | -0.31020 |
| O          | -0.85627 | -0.91668 | -1.21290 |
| O          | 0.58421  | -1.24467 | 0.60684  |
| H          | -1.53738 | 1.27289  | 0.07958  |
| H          | -0.40532 | 0.87300  | 1.49400  |
| H          | 0.47737  | 1.33348  | -1.50602 |

Supplementary Material (ESI) for PCCP  
This journal is © the Owner Societies 2011

|            |          |          |          |
|------------|----------|----------|----------|
| H          | 1.60093  | 0.93339  | -0.08485 |
| H          | 0.29931  | -2.08627 | 0.20150  |
| val+07_151 |          |          |          |
| C          | 0.50610  | 0.53094  | 0.00294  |
| C          | 1.31302  | -0.50635 | 0.17011  |
| N          | -0.90001 | 0.36470  | -0.36432 |
| O          | -1.26649 | 1.07083  | -1.37220 |
| O          | -1.67650 | 0.72123  | 0.93132  |
| H          | 0.76699  | 1.57986  | 0.05350  |
| H          | 2.36349  | -0.36179 | 0.39741  |
| H          | 0.96291  | -1.53235 | 0.08468  |
| H          | -2.17550 | 1.47579  | 0.56033  |
| H          | -1.14482 | -0.64106 | -0.41817 |
| val+07_152 |          |          |          |
| C          | 1.39505  | -1.34394 | 0.04474  |
| C          | -1.41733 | 1.76872  | 0.55431  |
| N          | 0.37900  | -0.88025 | -0.73236 |
| O          | 2.42281  | -1.85301 | -0.36498 |
| O          | -1.89505 | 0.65663  | 0.50402  |
| H          | 1.19274  | -1.18721 | 1.12425  |
| H          | -1.97888 | 2.62201  | 0.97974  |
| H          | -0.39914 | 1.98732  | 0.17964  |
| H          | -0.50020 | -0.56981 | -0.32821 |
| H          | 0.42710  | -1.05537 | -1.72764 |
| val+07_153 |          |          |          |
| C          | 0.20483  | 0.49093  | -0.33451 |
| C          | 0.83618  | -0.77299 | -0.06771 |
| N          | -1.12980 | 0.53892  | -0.49548 |
| O          | 2.03110  | -0.93609 | 0.13739  |
| O          | -2.30011 | 0.80764  | 0.86951  |
| H          | 0.74658  | 1.42710  | -0.28502 |
| H          | 0.13390  | -1.64508 | -0.09370 |
| H          | -1.53688 | 1.34173  | -0.96055 |
| H          | -1.66695 | 0.73638  | 1.60685  |
| H          | -1.59936 | -0.33114 | -0.72988 |
| val+07_154 |          |          |          |
| C          | 0.63005  | -0.35615 | -0.23292 |
| C          | 2.03510  | -0.88271 | -0.13403 |
| N          | -2.82049 | 1.49085  | -0.07430 |
| O          | 0.23206  | 0.64096  | 0.33493  |
| O          | -3.20009 | 2.49807  | 0.48697  |
| H          | -0.05559 | -0.94767 | -0.87736 |
| H          | 2.01843  | -1.90953 | 0.25440  |
| H          | 2.48235  | -0.93273 | -1.13553 |
| H          | 2.63962  | -0.24587 | 0.51526  |
| H          | -1.79534 | 1.34468  | 0.15838  |
| val+07_155 |          |          |          |
| C          | 0.24816  | -1.07225 | 0.30259  |
| C          | -0.53119 | 1.23447  | -0.32659 |
| N          | -0.88816 | -0.18229 | -0.06488 |
| O          | 1.34393  | -0.65254 | 0.55603  |
| O          | -1.51953 | -0.37700 | 1.14708  |
| H          | -0.03768 | 1.32523  | -1.29910 |
| H          | -1.46217 | 1.80095  | -0.29764 |
| H          | 0.13297  | 1.54904  | 0.47526  |
| H          | -1.43968 | -0.54955 | -0.85931 |
| H          | -0.11107 | -2.10406 | 0.37564  |
| val+07_158 |          |          |          |
| C          | 1.27026  | -1.56886 | -0.79034 |
| C          | -1.02484 | 0.90065  | 0.05472  |
| N          | -0.22017 | 0.10376  | 1.01098  |
| O          | 0.77788  | -1.19091 | -1.82847 |
| O          | -0.49188 | 0.30652  | 2.17253  |
| H          | 0.85082  | -2.41070 | -0.20344 |
| H          | 2.18654  | -1.11233 | -0.36459 |
| H          | -1.50096 | 0.19137  | -0.63144 |
| H          | -1.75103 | 1.53153  | 0.57430  |
| H          | -0.31801 | 1.48968  | -0.54136 |
| val+07_15  |          |          |          |
| C          | -0.15094 | -1.55181 | -1.08221 |



Supplementary Material (ESI) for PCCP  
This journal is © the Owner Societies 2011

|   |          |          |          |
|---|----------|----------|----------|
| C | -0.34808 | 1.87088  | 1.52275  |
| N | 0.65062  | -0.64804 | -0.68679 |
| O | -0.79781 | 2.78050  | 2.17261  |
| O | -0.35942 | 1.82899  | 0.18691  |
| H | -1.22430 | -1.36330 | -1.02405 |
| H | 0.11972  | 0.97728  | 1.98622  |
| H | 0.15873  | -2.52215 | -1.48451 |
| H | 1.63097  | -0.92570 | -0.78801 |
| H | 0.06080  | 0.98285  | -0.12293 |

val+07\_16

|   |          |          |          |
|---|----------|----------|----------|
| C | -0.41831 | -0.97577 | 1.98535  |
| C | -0.15874 | -1.38858 | 0.83517  |
| N | 0.12613  | -1.65358 | -0.53702 |
| O | 0.40709  | 1.48522  | 0.27608  |
| O | -0.19126 | 1.02904  | -0.97080 |
| H | 0.16371  | 0.73319  | 0.88767  |
| H | -0.50926 | -2.34650 | -0.95715 |
| H | 1.08595  | -1.99458 | -0.69076 |
| H | 0.01742  | -0.73856 | -1.04385 |
| H | -1.08043 | 1.42192  | -0.91540 |

val+07\_17

|   |          |          |          |
|---|----------|----------|----------|
| C | 0.30838  | -0.32032 | -0.82874 |
| C | -0.53629 | 0.52047  | 0.12165  |
| N | -0.01879 | -1.57871 | -0.70766 |
| O | -1.22446 | -0.18245 | 1.15193  |
| O | 0.30017  | 1.48180  | 0.72825  |
| H | -1.32922 | 0.99707  | -0.47756 |
| H | -0.72869 | -1.89578 | -0.03286 |
| H | 0.43743  | -2.29413 | -1.26389 |
| H | -0.61010 | -0.19083 | 1.90594  |
| H | 1.11197  | 1.48458  | 0.19022  |

val+07\_18

|   |          |          |          |
|---|----------|----------|----------|
| C | 1.76821  | 1.74241  | 0.41071  |
| C | -0.92317 | -0.50809 | -0.33620 |
| N | 0.31225  | -1.09756 | 0.17333  |
| O | 2.89508  | 1.60076  | 0.46343  |
| O | -1.25331 | 0.64115  | 0.40082  |
| H | -1.80696 | -1.15987 | -0.26172 |
| H | -0.75564 | -0.28948 | -1.40416 |
| H | 0.64644  | -1.83428 | -0.44604 |
| H | 0.14616  | -1.51608 | 1.08743  |
| H | -0.45495 | 1.19854  | 0.40128  |

val+07\_19

|   |          |          |          |
|---|----------|----------|----------|
| C | 0.70798  | -0.77178 | -0.45195 |
| C | -0.94705 | 1.98430  | 0.56013  |
| N | -0.47219 | -0.79239 | 0.02576  |
| O | 0.11580  | 2.41638  | 0.17594  |
| O | -1.09861 | -2.01543 | 0.13052  |
| H | 1.24479  | -1.66964 | -0.78062 |
| H | -1.11777 | 1.67345  | 1.60992  |
| H | -1.82533 | 1.88613  | -0.10836 |
| H | 1.18890  | 0.19820  | -0.52843 |
| H | -0.49102 | -2.71192 | -0.20211 |

val+07\_1

|   |          |          |          |
|---|----------|----------|----------|
| C | 0.08137  | 0.54707  | -0.61079 |
| C | -0.65596 | 1.59793  | -0.22954 |
| N | -0.05808 | -0.58310 | 0.37094  |
| O | 1.21754  | -0.87607 | 0.89157  |
| O | -0.57957 | -1.69927 | -0.31206 |
| H | -1.28300 | 1.65218  | 0.66923  |
| H | -0.65795 | 2.49679  | -0.84211 |
| H | -0.65610 | -0.49797 | 1.20563  |
| H | 1.77188  | -0.45594 | 0.18823  |
| H | -0.35793 | -1.43121 | -1.23809 |

val+07\_21

|   |          |          |          |
|---|----------|----------|----------|
| C | -0.17821 | -1.05349 | 0.65131  |
| C | -0.79094 | 1.05815  | -0.38120 |
| N | -1.13843 | -0.29434 | 0.05685  |
| O | 0.93611  | -0.63504 | 0.93611  |
| O | 0.24162  | 1.09105  | -1.33077 |
| H | -1.67578 | 1.49910  | -0.84382 |

Supplementary Material (ESI) for PCCP  
This journal is © the Owner Societies 2011

|   |          |          |          |
|---|----------|----------|----------|
| H | -0.52980 | 1.63182  | 0.51619  |
| H | -1.92888 | -0.76649 | -0.36293 |
| H | -0.50333 | -2.08777 | 0.87178  |
| H | 1.03472  | 0.78151  | -0.85782 |

val+07\_22

|   |          |          |          |
|---|----------|----------|----------|
| C | -0.03937 | -1.08157 | -0.18476 |
| C | -1.32516 | 0.96797  | -0.41552 |
| N | -1.19995 | -0.44001 | -0.14943 |
| O | -0.42231 | 1.69011  | -0.72709 |
| O | 2.17377  | 0.71224  | 0.64494  |
| H | 1.65571  | 0.01501  | 0.18750  |
| H | -2.37234 | 1.30320  | -0.29640 |
| H | -2.10191 | -0.86987 | 0.09028  |
| H | -0.26327 | -2.13160 | 0.08066  |
| H | 1.87252  | 1.51081  | 0.18691  |

val+07\_23

|   |          |          |          |
|---|----------|----------|----------|
| C | -0.89117 | -0.31246 | 0.99795  |
| C | -0.34425 | 0.83841  | 0.20817  |
| N | -0.55776 | -1.45983 | 0.46211  |
| O | 0.42369  | 0.56801  | -0.99264 |
| O | 1.76071  | 0.16178  | -0.56568 |
| H | -1.19453 | 1.42634  | -0.16580 |
| H | 0.24171  | 1.48858  | 0.87006  |
| H | 0.01813  | -1.55353 | -0.38203 |
| H | 2.27935  | 0.90290  | -0.92676 |
| H | -0.86318 | -2.32948 | 0.88484  |

val+07\_24

|   |          |          |          |
|---|----------|----------|----------|
| C | 2.21180  | 1.29295  | 0.27600  |
| C | -1.33072 | 0.48464  | -0.07620 |
| N | 0.32813  | -1.65952 | -0.02837 |
| O | 2.48635  | 2.39579  | 0.29734  |
| O | -0.66075 | 1.36138  | -0.57709 |
| H | -2.01393 | -0.15310 | -0.66960 |
| H | -1.34358 | 0.28976  | 1.01286  |
| H | 0.42587  | -2.06899 | -0.95630 |
| H | 1.07004  | -0.96556 | 0.05903  |
| H | 0.53688  | -2.40196 | 0.63803  |

val+07\_25

|   |          |          |          |
|---|----------|----------|----------|
| C | 1.74367  | 0.09710  | -2.25487 |
| C | -0.51029 | 1.29126  | 0.66525  |
| N | 0.45271  | -1.33057 | 0.18175  |
| O | 1.40863  | 1.18423  | -2.19976 |
| O | -1.14958 | 1.12844  | 1.67932  |
| H | -0.95698 | 1.19847  | -0.34435 |
| H | 0.56177  | 1.57084  | 0.67317  |
| H | 0.01416  | -1.98338 | -0.46616 |
| H | -0.05647 | -1.40767 | 1.06122  |
| H | 1.39068  | -1.68932 | 0.35413  |

val+07\_26

|   |          |          |          |
|---|----------|----------|----------|
| C | 0.32763  | 0.43328  | 0.13372  |
| C | -0.39802 | -0.88870 | 0.18829  |
| N | 0.62763  | 0.89944  | -1.15801 |
| O | -0.01193 | 1.36583  | 1.14742  |
| O | 1.32461  | 0.65637  | 1.07883  |
| H | -1.38261 | -0.80868 | -0.28673 |
| H | 0.17775  | -1.65665 | -0.33676 |
| H | -0.53216 | -1.17930 | 1.23113  |
| H | -0.15837 | 0.82944  | -1.79651 |
| H | 0.97797  | 1.85278  | -1.12897 |

val+07\_27

|   |          |          |          |
|---|----------|----------|----------|
| C | -0.72235 | 1.05280  | 0.35492  |
| C | -0.17244 | -1.29988 | -0.29569 |
| N | -1.04085 | -0.21216 | 0.21410  |
| O | 0.26400  | 1.71881  | 0.13361  |
| O | 1.74059  | 0.88584  | -0.63562 |
| H | -0.58169 | -1.68517 | -1.23499 |
| H | 0.82060  | -0.87524 | -0.45398 |
| H | -0.14079 | -2.10312 | 0.44705  |
| H | -1.98172 | -0.45796 | 0.49132  |
| H | 2.34864  | 1.35359  | -0.03681 |

val+07\_28  
C 1.01398 1.90913 1.40357  
C -0.29413 -1.16275 0.27714  
N -0.16981 0.65173 -1.22886  
O 0.46398 2.55850 2.15817  
O -0.81821 0.10509 -0.08221  
H -0.42185 -1.89725 -0.53459  
H 0.77377 -1.10172 0.53904  
H -0.86211 -1.49413 1.15165  
H -0.24826 -0.05896 -1.96546  
H 0.82565 0.70735 -0.98715

val+07\_29  
C 0.91260 0.05974 0.94582  
C -1.08193 -0.66192 -0.30103  
N -0.05694 0.29173 0.10407  
O -0.16118 1.52579 -0.47439  
O -1.23602 1.62302 -1.34015  
H 1.60561 0.86263 1.15707  
H -2.05509 -0.23074 -0.06206  
H -1.03178 -0.76939 -1.38549  
H -0.89777 -1.59977 0.22283  
H 0.99100 -0.91650 1.39912

val+07\_2  
C -1.34170 -0.28477 -0.38473  
C -0.74460 0.98334 -0.06223  
N -0.77579 -1.39993 -0.04070  
O 0.26042 1.45480 -0.61567  
O 1.88816 -0.61261 0.43153  
H -1.35821 1.60816 0.62173  
H -1.17410 -2.28541 -0.34530  
H 0.15721 -1.43636 0.40856  
H 1.57925 0.19523 -0.03484  
H 2.51997 -1.02034 -0.17994

val+07\_31  
C -0.00377 -0.93010 -0.39609  
C 0.78372 0.25421 -0.23393  
N -1.37787 -0.59294 0.13807  
O 0.16733 1.48629 -0.55271  
O 0.56342 1.22608 0.87773  
H 1.84000 0.18649 -0.49321  
H 0.37589 -1.83089 0.08274  
H -1.54081 0.36607 -0.20645  
H -2.09952 -1.20669 -0.24061  
H -1.48579 -0.54764 1.16576

val+07\_32  
C 0.76288 -1.41420 0.17956  
C -0.39694 2.14068 -0.29146  
N -0.67145 -1.35694 0.22648  
O -0.67588 1.36759 -1.18353  
O 0.21608 -0.62823 1.20351  
H 1.21267 -2.35946 0.48546  
H -0.35026 3.23339 -0.47143  
H -0.17416 1.79231 0.73158  
H 1.29561 -0.87434 -0.60657  
H -0.94325 -0.59489 -0.41020

val+07\_36  
C 0.25219 0.72170 0.15475  
C 0.00005 1.99114 0.01671  
N 0.09909 -0.25844 -0.79801  
O -0.16204 3.15614 0.13062  
O -1.38302 -0.78358 -1.12632  
H 0.36774 -0.04437 -1.76388  
H 0.52024 -1.14687 -0.51927  
H 1.52571 -1.85060 1.55862  
H 1.32146 -1.13089 1.55297  
H -1.83624 -0.42584 -0.33779

val+07\_38  
C -0.35644 0.29483 -0.46331  
C -0.16494 1.17949 0.49526  
N 0.82013 -0.69305 -0.41261  
O -0.70552 2.27928 1.06478

Supplementary Material (ESI) for PCCP  
This journal is © the Owner Societies 2011

|   |          |          |          |
|---|----------|----------|----------|
| O | 0.62156  | 1.64847  | 1.53852  |
| H | -1.75345 | -1.75937 | -0.50211 |
| H | 1.34262  | -0.63778 | -1.29153 |
| H | 0.43615  | -1.64331 | -0.36878 |
| H | 1.50518  | -0.60141 | 0.35749  |
| H | -1.81878 | -2.50465 | -0.43622 |

val+07\_39

|   |          |          |          |
|---|----------|----------|----------|
| C | -0.73317 | 1.27576  | -0.07177 |
| C | 0.56938  | 1.33097  | 0.15659  |
| N | 0.20689  | -1.90625 | 0.18959  |
| O | -1.55800 | 0.26672  | 0.38144  |
| O | 1.74757  | 1.31625  | 0.28213  |
| H | -1.20897 | 2.10883  | -0.57808 |
| H | 0.11368  | -2.43208 | -0.67794 |
| H | -1.03894 | -0.58022 | 0.32688  |
| H | 0.15600  | -2.57911 | 0.95279  |
| H | 1.14947  | -1.51786 | 0.19877  |

val+07\_3

|   |          |          |          |
|---|----------|----------|----------|
| C | -0.37577 | -1.13195 | -0.32494 |
| C | -0.42659 | 0.18747  | -0.08775 |
| N | 1.06165  | -1.55562 | 0.12826  |
| O | -1.49090 | 0.97221  | -0.47723 |
| O | 0.57756  | 0.95502  | 0.55535  |
| H | 1.49845  | -2.09013 | -0.62446 |
| H | 0.99014  | -2.18574 | 0.92960  |
| H | 1.66809  | -0.75704 | 0.39008  |
| H | -1.93851 | 1.29205  | 0.32517  |
| H | 0.62868  | 1.79774  | 0.07212  |

val+07\_40

|   |          |          |          |
|---|----------|----------|----------|
| C | -2.34972 | 0.58449  | -1.55941 |
| C | 0.97015  | 0.73510  | 0.61001  |
| N | -0.15361 | -0.16410 | 0.35498  |
| O | -1.93395 | -0.24030 | -2.23116 |
| O | 0.34426  | -1.26629 | -0.42887 |
| H | 0.63552  | 1.49505  | 1.32550  |
| H | 1.24751  | 1.23266  | -0.32374 |
| H | -0.41630 | -0.60848 | 1.23581  |
| H | 1.85575  | 0.22134  | 1.01126  |
| H | -0.21041 | -1.22166 | -1.22659 |

val+07\_41

|   |          |          |          |
|---|----------|----------|----------|
| C | -0.50487 | 1.39997  | -0.39268 |
| C | 0.46694  | 2.10834  | 0.13685  |
| N | 0.38275  | -1.20054 | 0.42864  |
| O | -1.40942 | 0.84014  | -0.89606 |
| O | -0.71146 | -1.90383 | -0.18521 |
| H | 0.46092  | 3.18563  | 0.02138  |
| H | 1.25724  | 1.60964  | 0.67853  |
| H | 0.35038  | -1.50114 | 1.40504  |
| H | 1.21315  | -1.64649 | 0.03326  |
| H | -1.22192 | -1.17522 | -0.58166 |

val+07\_42

|   |          |          |          |
|---|----------|----------|----------|
| C | -1.23776 | -0.39374 | -1.22019 |
| C | -1.09402 | -0.21900 | 0.26798  |
| N | 1.60494  | 0.61016  | 1.51445  |
| O | -1.28385 | -1.42283 | -0.16534 |
| O | 1.70751  | 0.04089  | 0.17862  |
| H | 0.59620  | 0.56255  | 1.68805  |
| H | 2.01720  | -0.11975 | 2.09970  |
| H | -0.34707 | -0.44460 | -1.83661 |
| H | -2.19482 | -0.22266 | -1.70338 |
| H | 2.14148  | 0.76027  | -0.30547 |

val+07\_44

|   |          |          |          |
|---|----------|----------|----------|
| C | 0.38381  | 0.94990  | -0.03888 |
| C | -0.96757 | 1.31984  | 0.18265  |
| N | 0.50336  | -0.32992 | -0.54642 |
| O | -1.92516 | 0.57405  | -0.09630 |
| O | 0.89961  | -1.53170 | 0.43063  |
| H | 1.27278  | 1.51496  | 0.19730  |
| H | -1.14130 | 2.33428  | 0.58884  |
| H | -0.44654 | -0.60843 | -0.85328 |
| H | 1.22656  | -0.51349 | -1.23938 |

Supplementary Material (ESI) for PCCP  
This journal is © the Owner Societies 2011

|           |          |          |          |
|-----------|----------|----------|----------|
| H         | 0.45644  | -1.22550 | 1.24494  |
| val+07_45 |          |          |          |
| C         | -1.10357 | 1.62206  | 2.14027  |
| C         | -0.80597 | -1.42925 | -0.51265 |
| N         | -0.37831 | 1.70198  | 1.21841  |
| O         | 0.07669  | -1.19463 | -1.31397 |
| O         | 1.17384  | 1.39315  | -0.99657 |
| H         | -1.33132 | -2.40203 | -0.51605 |
| H         | 2.11748  | 1.28991  | -0.80115 |
| H         | -1.12224 | -0.69585 | 0.24948  |
| H         | 0.24896  | 1.70992  | 0.39341  |
| H         | 0.86764  | 0.49614  | -1.25526 |
| val+07_46 |          |          |          |
| C         | -1.02784 | 0.82731  | 0.96163  |
| C         | -0.00234 | 0.28711  | -0.06980 |
| N         | -0.33579 | -1.07092 | -0.48239 |
| O         | -2.09114 | 0.09317  | 0.91742  |
| O         | 1.28514  | 0.36851  | 0.50203  |
| H         | -0.09458 | 0.93636  | -0.95851 |
| H         | -1.93414 | -0.66594 | 0.25123  |
| H         | -0.05454 | -1.27144 | -1.43761 |
| H         | 0.14350  | -1.73111 | 0.12869  |
| H         | 1.18562  | 0.97685  | 1.25941  |
| val+07_47 |          |          |          |
| C         | 0.23516  | 0.79955  | -0.53362 |
| C         | -1.05691 | 0.80910  | -0.20359 |
| N         | -0.96600 | -1.32980 | 0.73996  |
| O         | -1.77337 | -0.16502 | 0.45486  |
| O         | 0.80028  | 1.93131  | -1.09820 |
| H         | -1.70033 | 1.65701  | -0.41514 |
| H         | -1.52547 | -2.08510 | 0.33874  |
| H         | -1.06754 | -1.42517 | 1.75269  |
| H         | 0.88578  | -0.04172 | -0.31992 |
| H         | 1.48011  | 1.64524  | -1.72578 |
| val+07_48 |          |          |          |
| C         | -1.20959 | 0.23601  | 0.39449  |
| C         | 0.11455  | -0.30819 | -0.13857 |
| N         | 0.13120  | -1.75820 | -0.04711 |
| O         | -1.93953 | -0.38604 | 1.12465  |
| O         | -1.50939 | 1.51129  | 0.04272  |
| H         | 0.90629  | 0.20460  | 0.44093  |
| H         | 1.07209  | -2.09824 | 0.12896  |
| H         | 0.24395  | 0.01278  | -1.18389 |
| H         | -0.45600 | -2.03304 | 0.73892  |
| H         | -0.84517 | 1.85203  | -0.57971 |
| val+07_49 |          |          |          |
| C         | -3.09854 | 0.11942  | -1.48723 |
| C         | -0.41412 | 0.04074  | -0.03520 |
| N         | 0.08809  | 1.13440  | -0.59786 |
| O         | -2.76170 | 1.06758  | -2.02915 |
| O         | 0.51947  | -0.44695 | 0.81961  |
| H         | 2.88667  | -0.00338 | 1.78442  |
| H         | 1.01727  | 1.50567  | -0.39253 |
| H         | -0.47891 | 1.63244  | -1.26900 |
| H         | 3.55889  | 0.07949  | 2.09217  |
| H         | 0.13727  | -1.24090 | 1.21975  |
| val+07_4  |          |          |          |
| C         | 0.01173  | -1.00771 | -0.68255 |
| C         | -1.19950 | 0.96888  | 0.17071  |
| N         | -1.07371 | -0.30919 | -0.12704 |
| O         | 1.24773  | -0.35611 | -0.42115 |
| O         | -0.18982 | 1.84633  | 0.02652  |
| H         | -2.16898 | 1.38751  | 0.40148  |
| H         | -1.93627 | -0.84325 | -0.08912 |
| H         | -0.00418 | -2.05517 | -0.37766 |
| H         | 1.55481  | -0.56645 | 0.48444  |
| H         | 0.60137  | 1.31716  | -0.24192 |
| val+07_51 |          |          |          |
| C         | -0.31133 | 0.97315  | 0.72740  |
| C         | 0.66211  | -1.11220 | 0.32715  |

Supplementary Material (ESI) for PCCP  
 This journal is © the Owner Societies 2011

|   |          |          |          |
|---|----------|----------|----------|
| N | 0.13955  | -1.70580 | -0.85402 |
| O | 0.76383  | 0.35402  | 0.27226  |
| O | -0.05741 | 2.27894  | 0.54786  |
| H | 1.68848  | -1.44230 | 0.49491  |
| H | 0.02995  | -1.35975 | 1.18127  |
| H | -0.81779 | -1.40028 | -1.01429 |
| H | 0.69213  | -1.45776 | -1.67119 |
| H | -0.83671 | 2.74289  | 0.89075  |

val+07\_52

|   |          |          |          |
|---|----------|----------|----------|
| C | -0.04165 | 1.58047  | 0.45428  |
| C | 1.24154  | 1.97485  | 0.37449  |
| N | -0.21054 | 0.27944  | -0.18622 |
| O | -0.52410 | -0.82378 | 0.79535  |
| O | -0.85160 | -1.97864 | 0.01077  |
| H | -0.98953 | 1.96140  | 0.83915  |
| H | 1.38515  | 2.98480  | 0.79111  |
| H | -0.95910 | 0.16887  | -0.88336 |
| H | 0.74697  | 0.12697  | -0.56570 |
| H | -0.01814 | -2.48640 | 0.06015  |

val+07\_53

|   |          |          |          |
|---|----------|----------|----------|
| C | -1.25541 | 2.37551  | -0.28646 |
| C | 0.13761  | 0.50456  | -0.16854 |
| N | -0.69867 | -0.28319 | -0.66021 |
| O | -0.07517 | 1.91664  | 0.05975  |
| O | 1.45758  | -2.24145 | -0.36884 |
| H | -1.17058 | 3.45396  | -0.01957 |
| H | 1.13709  | 0.22616  | 0.14917  |
| H | -1.56655 | 0.23220  | -0.88160 |
| H | 0.59458  | -1.93020 | -0.70032 |
| H | 1.22233  | -2.79229 | 0.39252  |

val+07\_54

|   |          |          |          |
|---|----------|----------|----------|
| C | -0.64082 | 1.69714  | -0.68616 |
| C | 0.12460  | -0.53204 | -0.12527 |
| N | 0.14729  | -0.11056 | 1.19895  |
| O | -0.08265 | 0.63753  | -1.16898 |
| O | -0.94412 | -1.37299 | -0.34192 |
| H | -0.75553 | 2.35201  | -1.58921 |
| H | 1.08912  | -0.92524 | -0.46095 |
| H | -0.62749 | 0.54268  | 1.34363  |
| H | 1.00982  | 0.38740  | 1.40179  |
| H | -1.02180 | -1.51542 | -1.29956 |

val+07\_55

|   |          |          |          |
|---|----------|----------|----------|
| C | -0.16699 | 0.06790  | -0.19874 |
| C | 1.05689  | -0.29227 | 0.23664  |
| N | 1.28150  | -1.76149 | 0.00625  |
| O | -0.54898 | 1.30145  | -0.08597 |
| O | -2.00316 | 1.43171  | -0.66953 |
| H | 1.90561  | 0.19927  | 0.70359  |
| H | 1.41579  | -2.32506 | 0.85706  |
| H | 2.04751  | -1.99361 | -0.64096 |
| H | 0.37370  | -2.01049 | -0.43152 |
| H | -2.10138 | 2.38769  | -0.50023 |

val+07\_56

|   |          |          |          |
|---|----------|----------|----------|
| C | -1.08229 | 0.22320  | 0.01595  |
| C | 1.31449  | 0.46594  | 0.26656  |
| N | 1.10168  | -1.06352 | 0.08544  |
| O | -0.05659 | 1.00170  | -0.09335 |
| O | -2.21804 | 0.89419  | -0.16881 |
| H | 1.87725  | 0.76765  | -0.62833 |
| H | 0.03007  | -1.12849 | 0.20637  |
| H | 1.58813  | -1.56832 | 0.82382  |
| H | 1.33186  | -1.49698 | -0.82053 |
| H | -2.01407 | 1.84473  | -0.32794 |

val+07\_57

|   |          |          |          |
|---|----------|----------|----------|
| C | 1.30712  | 1.95919  | -0.91264 |
| C | 0.31400  | 1.87286  | -0.06650 |
| N | 0.67800  | 0.53692  | 0.41224  |
| O | -1.30293 | -1.51068 | 0.99816  |
| O | -0.62202 | -1.98128 | -0.20020 |
| H | -0.54119 | 2.41466  | 0.31335  |
| H | 1.50289  | 0.47217  | 0.99851  |

Supplementary Material (ESI) for PCCP  
This journal is © the Owner Societies 2011

|   |          |          |          |
|---|----------|----------|----------|
| H | -0.82330 | -0.66130 | 1.12671  |
| H | 0.60555  | -0.23718 | -0.24542 |
| H | -1.36550 | -1.98425 | -0.82912 |

val+07\_58

|   |          |          |          |
|---|----------|----------|----------|
| C | 0.67795  | 0.03383  | -0.12901 |
| C | -0.12733 | 1.19854  | -0.04443 |
| N | -0.07115 | -1.11271 | -0.31300 |
| O | -1.36634 | 1.17192  | -0.16723 |
| O | -0.37151 | -2.06734 | 0.93418  |
| H | 0.40531  | 2.15717  | 0.10247  |
| H | 0.29734  | -1.84328 | -0.91912 |
| H | -1.02294 | -0.79683 | -0.57427 |
| H | 1.74787  | -0.04221 | -0.00712 |
| H | -0.43379 | -1.39311 | 1.63762  |

val+07\_60

|   |          |          |          |
|---|----------|----------|----------|
| C | 0.61587  | -0.54769 | -0.35427 |
| C | -0.37050 | 0.38827  | -0.01586 |
| N | 0.16871  | -1.85338 | 0.16929  |
| O | -1.33402 | 0.09275  | 0.73333  |
| O | -0.28316 | 1.67315  | -0.47231 |
| H | 0.82003  | -2.31711 | 0.81051  |
| H | -0.69327 | -1.49445 | 0.70489  |
| H | -0.13317 | -2.54418 | -0.52949 |
| H | 1.27708  | -0.55007 | -1.20768 |
| H | 0.54653  | 1.76490  | -0.96922 |

val+07\_61

|   |          |          |          |
|---|----------|----------|----------|
| C | -0.64971 | 1.06331  | -0.04516 |
| C | 0.63814  | 0.60122  | -0.22334 |
| N | 0.74634  | -0.71650 | 0.28752  |
| O | -0.82562 | 2.32851  | -0.52894 |
| O | 0.79512  | -1.85243 | -0.71655 |
| H | 1.53980  | 1.00727  | -0.67676 |
| H | -0.13109 | -0.83908 | 0.82390  |
| H | 1.57965  | -0.95053 | 0.83296  |
| H | -1.74274 | 2.56802  | -0.33407 |
| H | 0.21752  | -1.47530 | -1.41056 |

val+07\_62

|   |          |          |          |
|---|----------|----------|----------|
| C | -0.04746 | 0.79672  | -0.38510 |
| C | 0.74566  | 1.13853  | 0.61805  |
| N | -0.86158 | -0.44486 | -0.42682 |
| O | -0.73929 | -1.08190 | -1.53611 |
| O | -0.49137 | -1.29496 | 0.80840  |
| H | -0.17627 | 1.34465  | -1.31099 |
| H | 1.33384  | 2.04859  | 0.55184  |
| H | -1.83992 | -0.24315 | -0.14907 |
| H | 0.83581  | 0.52200  | 1.50370  |
| H | -0.00772 | -1.99171 | 0.32230  |

val+07\_63

|   |          |          |          |
|---|----------|----------|----------|
| C | -0.36433 | 0.11911  | 0.12447  |
| C | 0.90399  | 0.26549  | 0.54453  |
| N | -0.75842 | -1.29263 | 0.00622  |
| O | -1.43958 | 0.93204  | -0.24026 |
| O | 1.24575  | 1.62525  | 0.64599  |
| H | -1.53382 | -1.57662 | 0.62538  |
| H | -1.01208 | -1.59051 | -0.94888 |
| H | 0.13792  | -1.72585 | 0.30723  |
| H | -1.09316 | 1.83406  | -0.13575 |
| H | 2.16153  | 1.64445  | 0.95028  |

val+07\_64

|   |          |          |          |
|---|----------|----------|----------|
| C | 0.46420  | 1.33207  | 0.07526  |
| C | 0.48224  | 2.50109  | 0.38609  |
| N | 0.53845  | 0.04358  | -0.34405 |
| O | 0.55549  | -0.87699 | 0.79225  |
| O | -1.54631 | -1.85280 | -0.82503 |
| H | 0.44144  | 3.52465  | 0.67743  |
| H | -1.21562 | -2.55231 | -1.40876 |
| H | -0.28444 | -0.26696 | -0.87201 |
| H | 1.46836  | -1.20947 | 0.76918  |
| H | -1.01500 | -1.94677 | -0.01235 |

val+07\_66

Supplementary Material (ESI) for PCCP  
This journal is © the Owner Societies 2011

|   |          |          |          |
|---|----------|----------|----------|
| C | -0.79653 | 0.56705  | -0.93796 |
| C | -0.92111 | -0.81198 | -0.31458 |
| N | 0.40758  | -1.36075 | -0.24365 |
| O | -0.08662 | 1.45364  | -0.65665 |
| O | 1.05798  | 1.04556  | 0.92693  |
| H | -1.58807 | -1.43721 | -0.91331 |
| H | -1.43155 | -0.58144 | 0.64270  |
| H | 0.95955  | -0.76998 | 0.39490  |
| H | 1.85399  | 1.46263  | 0.55196  |
| H | 0.38306  | -2.33731 | 0.03357  |

val+07\_69

|   |          |          |          |
|---|----------|----------|----------|
| C | -1.95001 | 2.02477  | 0.19901  |
| C | 0.36201  | -1.14730 | -0.14500 |
| N | 0.33480  | 0.24845  | 0.39099  |
| O | -1.30977 | 2.13941  | -0.75718 |
| O | -0.63768 | 0.42854  | 1.31858  |
| H | -0.61791 | -1.33006 | -0.58516 |
| H | 1.15955  | -1.26211 | -0.88791 |
| H | 0.51156  | -1.81220 | 0.70541  |
| H | 0.19264  | 0.90109  | -0.41334 |
| H | 1.27330  | 0.47081  | 0.76739  |

val+07\_6

|   |          |          |          |
|---|----------|----------|----------|
| C | 0.47615  | -1.19592 | 0.09424  |
| C | -0.32910 | 1.14435  | 0.18400  |
| N | -0.50783 | -0.26130 | -0.13132 |
| O | 1.65600  | -0.93063 | 0.22808  |
| O | -1.81964 | -0.73673 | 0.08046  |
| H | -0.70932 | 1.36908  | 1.18752  |
| H | -0.85286 | 1.76564  | -0.54924 |
| H | 0.05832  | -2.21825 | 0.09126  |
| H | 0.74239  | 1.34666  | 0.14075  |
| H | -2.22411 | -0.72939 | -0.80485 |

val+07\_71

|   |          |          |          |
|---|----------|----------|----------|
| C | -0.70041 | 0.84817  | -0.17748 |
| C | -0.95312 | -0.41111 | 0.16609  |
| N | 0.07816  | -1.39235 | 0.35670  |
| O | -0.63867 | 1.97413  | -0.48366 |
| O | 2.13787  | 0.47748  | -0.12596 |
| H | -2.01037 | -0.63745 | 0.30502  |
| H | 2.29593  | 0.49222  | -1.08148 |
| H | -0.08370 | -2.20532 | -0.23523 |
| H | 0.09564  | -1.71990 | 1.32161  |
| H | 1.64238  | -0.35827 | 0.02499  |

val+07\_72

|   |          |          |          |
|---|----------|----------|----------|
| C | -1.01324 | 0.58370  | 1.27678  |
| C | -0.28234 | 1.21488  | 0.18356  |
| N | 0.35615  | -1.68676 | -0.47761 |
| O | -1.21016 | -0.67847 | 1.35922  |
| O | 0.95067  | 1.17317  | 0.05514  |
| H | -0.89266 | 1.96380  | -0.37075 |
| H | 1.01317  | -0.90135 | -0.41854 |
| H | 0.09632  | -1.80504 | -1.45579 |
| H | -0.74476 | -1.20523 | 0.57513  |
| H | 0.83885  | -2.53460 | -0.18326 |

val+07\_74

|   |          |          |          |
|---|----------|----------|----------|
| C | 1.61220  | 0.95061  | -0.62425 |
| C | 0.56029  | 0.49105  | 0.05601  |
| N | -2.02400 | -1.57173 | 0.23115  |
| O | 1.95944  | 1.87502  | 0.37988  |
| O | 0.80006  | 1.36997  | 1.13191  |
| H | -2.68833 | -1.53473 | -0.54090 |
| H | -1.78503 | -2.55482 | 0.35433  |
| H | -2.54399 | -1.30056 | 1.06481  |
| H | 2.17553  | 0.85095  | -1.53789 |
| H | -0.26927 | -0.21145 | 0.05105  |

val+07\_75

|   |          |          |          |
|---|----------|----------|----------|
| C | -0.84637 | -1.35845 | -0.30146 |
| C | -1.30254 | -0.14182 | 0.23833  |
| N | 1.79455  | 0.35430  | 0.11972  |
| O | -2.43893 | -0.56542 | 0.54645  |
| O | -0.77666 | 1.00970  | 0.55343  |



Supplementary Material (ESI) for PCCP  
This journal is © the Owner Societies 2011

|   |          |          |          |
|---|----------|----------|----------|
| H | -1.19207 | -1.48346 | -1.33662 |
| H | 2.30983  | 0.53803  | -0.73959 |
| H | 1.62259  | -0.65265 | 0.16822  |
| H | 0.21496  | 0.95479  | 0.31915  |
| H | 2.40734  | 0.59339  | 0.89807  |

val+07\_78

|   |          |          |          |
|---|----------|----------|----------|
| C | 1.28653  | 1.00507  | -0.26332 |
| C | -1.07198 | 0.82727  | -0.24588 |
| N | -0.19793 | -1.55110 | 0.46116  |
| O | 0.13719  | 1.49374  | 0.15094  |
| O | -1.32241 | 0.59780  | -1.38488 |
| H | 2.00579  | 1.77481  | 0.11441  |
| H | -1.72024 | 0.74549  | 0.62892  |
| H | -0.70370 | -2.18061 | -0.16014 |
| H | 0.62533  | -1.22692 | -0.05332 |
| H | 0.13650  | -2.11235 | 1.24352  |

val+07\_79

|   |          |          |          |
|---|----------|----------|----------|
| C | -1.16992 | 2.09696  | 0.03112  |
| C | 1.07931  | -1.76894 | -0.23714 |
| N | 0.43314  | -0.68029 | -0.15824 |
| O | 0.15193  | 2.06891  | -0.10264 |
| O | -1.91036 | 1.13548  | 0.09716  |
| H | -1.52679 | 3.13804  | 0.07665  |
| H | 2.16522  | -1.73758 | -0.34764 |
| H | 0.61930  | -2.76288 | -0.20199 |
| H | -0.58039 | -0.79927 | -0.05637 |
| H | 0.44688  | 1.11007  | -0.14120 |

val+07\_80

|   |          |          |          |
|---|----------|----------|----------|
| C | 0.36445  | 0.74374  | -0.50481 |
| C | 1.35170  | 0.09381  | 0.09819  |
| N | -1.60193 | -1.00177 | 0.39343  |
| O | -0.43550 | 1.39100  | -1.07455 |
| O | 2.63674  | 0.64673  | 0.05899  |
| H | 1.14036  | -0.78274 | 0.69615  |
| H | 3.14644  | 0.15980  | -0.60939 |
| H | -2.09621 | -0.34971 | 1.00070  |
| H | -1.76816 | -1.93284 | 0.77334  |
| H | -2.07999 | -0.96451 | -0.50555 |

val+07\_81

|   |          |          |          |
|---|----------|----------|----------|
| C | -0.89468 | -0.81583 | -0.75101 |
| C | -1.52204 | 0.48267  | -0.24440 |
| N | 2.09911  | 0.16398  | 0.38989  |
| O | -1.59403 | -1.63334 | -1.31150 |
| O | -0.88908 | 1.34648  | 0.32442  |
| H | -2.61066 | 0.56768  | -0.44244 |
| H | 1.36891  | 0.85212  | 0.57520  |
| H | 2.51667  | -0.06596 | 1.29084  |
| H | 2.82307  | 0.64539  | -0.14214 |
| H | 0.19144  | -0.93119 | -0.56866 |

val+07\_82

|   |          |          |          |
|---|----------|----------|----------|
| C | 2.32782  | 0.71222  | -0.81190 |
| C | 0.65463  | -0.16819 | -0.21067 |
| N | -0.26729 | 0.21349  | 0.74640  |
| O | 1.01376  | 0.86953  | -1.14680 |
| O | 2.09011  | -0.22163 | 0.13932  |
| H | 0.36207  | -1.09552 | -0.70512 |
| H | -2.86275 | 1.02735  | -0.17968 |
| H | 0.03713  | 0.98570  | 1.33100  |
| H | -0.65578 | -0.54790 | 1.29040  |
| H | -3.57999 | 1.17194  | -0.31333 |

val+07\_84

|   |          |          |          |
|---|----------|----------|----------|
| C | -0.01385 | 1.60535  | 0.18724  |
| C | 0.31049  | -2.08822 | 0.41440  |
| N | -0.43583 | 1.00308  | -0.94751 |
| O | 0.42289  | 1.03082  | 1.17635  |
| O | -0.15298 | -1.95080 | -0.70162 |
| H | -0.10017 | 2.70868  | 0.14442  |
| H | 0.53551  | -3.09784 | 0.81188  |
| H | 0.52033  | -1.22006 | 1.06258  |
| H | -0.78386 | 1.55054  | -1.72051 |
| H | -0.40502 | -0.01516 | -1.02713 |

val+07\_85  
C 0.54342 -1.41221 -0.13114  
C 0.50178 -0.10024 -0.28322  
N -0.68498 0.67300 -0.39071  
O 1.34075 -2.46596 0.14729  
O -0.20010 -2.53772 -0.02467  
H 1.43935 0.44467 -0.25618  
H -1.52412 0.10672 -0.30267  
H -1.56834 3.34760 1.60167  
H -1.33017 2.75289 1.22101  
H -0.73109 1.17455 -1.27548

val+07\_86  
C -0.46103 0.73405 -0.93254  
C 0.39565 -0.44778 -0.50824  
N 0.81443 -0.26347 0.93033  
O -1.16782 0.69737 -1.91436  
O 1.49973 0.88319 1.10209  
H -0.36746 1.62342 -0.28198  
H 1.33285 -0.44340 -1.07146  
H -0.13705 -1.39449 -0.66378  
H -0.04905 -0.31655 1.51374  
H 1.35585 -1.10824 1.20410

val+07\_87  
C 0.92350 1.72714 0.79881  
C -0.28056 -1.22781 0.36424  
N 0.50501 -0.28590 -0.43350  
O -0.34265 1.96672 1.20700  
O 0.30180 2.60461 -0.02094  
H -0.48234 -2.19060 -0.13034  
H -1.23785 -0.76261 0.61855  
H 1.42644 -0.65672 -0.65076  
H 0.04212 -0.06371 -1.31242  
H 0.25094 -1.42721 1.29997

val+07\_88  
C 1.11520 0.00747 0.30576  
C -0.98644 -0.87225 -0.62336  
N -0.21826 0.12182 -0.27117  
O 0.25996 2.34901 -0.02639  
O -0.66198 1.40372 -0.43970  
H 1.80996 0.54135 -0.34413  
H 1.35511 -1.05181 0.39677  
H -0.63192 -1.88246 -0.48747  
H -1.95696 -0.64152 -1.04094  
H 1.10995 0.52188 1.26774

val+07\_89  
C 1.59958 0.17095 0.35663  
C -1.75476 0.37309 -1.22752  
N 0.69698 -0.59042 1.01546  
O 1.36708 0.84945 -0.63571  
O -1.96597 -0.38577 -0.30087  
H 2.60930 0.12710 0.80956  
H -2.57000 0.65571 -1.92285  
H -0.27091 -0.63103 0.69043  
H 0.96985 -1.12253 1.82834  
H -0.75345 0.80165 -1.40527

val+07\_8  
C 0.60207 -0.29890 0.11255  
C -1.56719 0.83871 -0.01742  
N -0.74898 -0.21241 0.03750  
O 1.25113 0.86659 -0.28068  
O 1.06496 -1.48101 -0.47690  
H -1.13600 1.82572 -0.06743  
H -2.62409 0.67140 0.12163  
H -1.18186 -1.13125 0.06294  
H 1.74799 1.20569 0.47848  
H 1.77818 -1.82224 0.08232

val+07\_90  
C -0.23478 -0.83280 0.27594  
C -0.89843 -1.96158 0.35274  
N 0.43777 0.19641 0.29057

Supplementary Material (ESI) for PCCP  
This journal is © the Owner Societies 2011

|   |          |          |          |
|---|----------|----------|----------|
| O | 1.54030  | 2.73326  | -0.45001 |
| O | 2.37384  | 2.24312  | 0.63925  |
| H | -0.53205 | -2.85055 | -0.14872 |
| H | -1.82947 | -2.01740 | 0.90593  |
| H | 1.90209  | 1.40205  | 0.83636  |
| H | 1.16374  | 3.52672  | -0.03023 |
| H | 0.28130  | 0.88548  | -0.45372 |

|           |          |          |          |
|-----------|----------|----------|----------|
| val+07_91 |          |          |          |
| C         | -0.39928 | 0.57039  | -0.38120 |
| C         | -0.63743 | 1.87858  | -0.48221 |
| N         | 0.64889  | -2.36512 | 0.13657  |
| O         | 0.50304  | 2.22192  | 0.27010  |
| O         | 0.76567  | 0.77779  | 0.38152  |
| H         | -1.30869 | 2.61850  | -0.88638 |
| H         | 1.19632  | -2.92051 | -0.51964 |
| H         | 1.30983  | -1.73910 | 0.59597  |
| H         | 0.32646  | -3.01172 | 0.85539  |
| H         | -0.72091 | -0.42784 | -0.63163 |

|           |          |          |          |
|-----------|----------|----------|----------|
| val+07_92 |          |          |          |
| C         | -0.33293 | -0.39265 | 0.58420  |
| C         | 0.50167  | 0.83001  | 0.16190  |
| N         | -0.41425 | -1.36883 | -0.51291 |
| O         | 0.88739  | 1.66140  | 0.94780  |
| O         | 0.72776  | 0.89028  | -1.15921 |
| H         | -1.33814 | -0.02449 | 0.81671  |
| H         | 0.30731  | 0.07163  | -1.52581 |
| H         | -1.31543 | -1.83727 | -0.53661 |
| H         | 0.08732  | -0.78468 | 1.51760  |
| H         | 0.29741  | -2.08939 | -0.41698 |

|           |          |          |          |
|-----------|----------|----------|----------|
| val+07_93 |          |          |          |
| C         | -1.01628 | 0.52517  | 0.56519  |
| C         | 0.36364  | 0.51564  | -0.11729 |
| N         | 0.83380  | -0.86366 | -0.31707 |
| O         | -1.51290 | 1.52645  | 1.02172  |
| O         | -1.61505 | -0.67545 | 0.57302  |
| H         | 0.23809  | 1.00043  | -1.09157 |
| H         | 1.03747  | 1.14961  | 0.47049  |
| H         | -0.96123 | -1.28710 | 0.14897  |
| H         | 1.35545  | -0.96399 | -1.18307 |
| H         | 1.44732  | -1.15589 | 0.43991  |

|           |          |          |          |
|-----------|----------|----------|----------|
| val+07_94 |          |          |          |
| C         | -0.64436 | 1.09873  | 0.58923  |
| C         | 0.77075  | 1.17057  | 0.00203  |
| N         | -0.11481 | -1.32684 | -0.41528 |
| O         | -0.86632 | 0.99100  | 1.77205  |
| O         | 1.77162  | 1.12403  | 0.67741  |
| H         | -1.45318 | 1.19055  | -0.16854 |
| H         | 0.79593  | 1.30422  | -1.10182 |
| H         | -1.02751 | -1.77927 | -0.43592 |
| H         | 0.33969  | -1.61771 | 0.44923  |
| H         | 0.43079  | -1.71578 | -1.18289 |

|           |          |          |          |
|-----------|----------|----------|----------|
| val+07_95 |          |          |          |
| C         | 1.06330  | -0.93712 | 0.82295  |
| C         | 1.50350  | -0.61514 | -0.38304 |
| N         | -1.48724 | 0.83693  | -0.17061 |
| O         | 0.68603  | -0.37335 | -1.46806 |
| O         | 0.65357  | -1.12523 | 1.91878  |
| H         | 2.57305  | -0.61456 | -0.56417 |
| H         | -0.12119 | 0.09666  | -1.12567 |
| H         | -1.44021 | 0.55124  | 0.80690  |
| H         | -2.40510 | 0.56142  | -0.51623 |
| H         | -1.45792 | 1.85516  | -0.18164 |

|           |          |          |          |
|-----------|----------|----------|----------|
| val+07_97 |          |          |          |
| C         | -1.09645 | 0.70361  | -0.35839 |
| C         | 0.19488  | 0.77323  | -0.04454 |
| N         | 0.94709  | -0.40422 | 0.41739  |
| O         | 2.10936  | -0.54514 | -0.26838 |
| O         | -1.82341 | -0.43337 | -0.10127 |
| H         | -1.62587 | 1.54509  | -0.79879 |
| H         | 0.82533  | 1.63655  | -0.19794 |
| H         | 0.30897  | -1.21917 | 0.31779  |

Supplementary Material (ESI) for PCCP  
This journal is © the Owner Societies 2011

|           |          |          |          |
|-----------|----------|----------|----------|
| H         | 1.09336  | -0.31476 | 1.44553  |
| H         | -2.59936 | -0.45932 | -0.68020 |
| val+07_98 |          |          |          |
| C         | -0.85018 | 0.97462  | -0.29295 |
| C         | 0.50402  | 0.56052  | -0.51600 |
| N         | 0.77458  | -0.60302 | 0.06595  |
| O         | 1.83730  | -1.24824 | 0.07610  |
| O         | -1.04722 | 2.14736  | -0.90606 |
| H         | 1.31058  | 1.03775  | -1.06885 |
| H         | 0.18017  | -3.24366 | 1.79312  |
| H         | 0.78123  | -2.98320 | 1.43795  |
| H         | -0.04453 | -0.99392 | 0.57290  |
| H         | -1.96856 | 2.40829  | -0.74245 |
| val+07_99 |          |          |          |
| C         | -1.00155 | 0.71978  | 0.52531  |
| C         | 0.27096  | 0.81105  | -0.03283 |
| N         | 0.86224  | -0.46610 | -0.48126 |
| O         | -1.71485 | 1.57272  | 1.04466  |
| O         | -1.50829 | -0.61949 | 0.41618  |
| H         | 0.93328  | 1.65673  | 0.03923  |
| H         | 1.65103  | -0.81969 | 0.08391  |
| H         | 0.08760  | -1.14613 | -0.38947 |
| H         | 1.17667  | -0.47110 | -1.46097 |
| H         | -2.40119 | -0.55957 | 0.79324  |
| val+07_9  |          |          |          |
| C         | -0.48688 | 1.16628  | 0.49894  |
| C         | -0.25502 | 2.50208  | -0.30341 |
| N         | 0.20104  | 1.17662  | -0.58414 |
| O         | 0.17348  | -1.53229 | 1.23503  |
| O         | 0.60084  | -1.64606 | -0.15436 |
| H         | -1.05882 | 2.90210  | -0.91871 |
| H         | 0.46689  | 3.22406  | 0.07422  |
| H         | -0.23739 | -0.62857 | 1.21213  |
| H         | 0.75575  | 0.54197  | -1.15285 |
| H         | -0.00200 | -2.34539 | -0.46034 |

**Coordinates and thermochemical properties for the all C<sub>2</sub>H<sub>5</sub>NO<sub>2</sub> water phase structures**

| Filename   | dfH    | S(scaled)S(UNscaled) |        | G           | Cv(UNscaled) |
|------------|--------|----------------------|--------|-------------|--------------|
| Units      | kJ/mol | J/molK               | J/molK | Hartree     | J/molK       |
| val+03_10: | -353.3 | 310.9                | 308.7  | -284.080661 | 79.1         |
| val+03_12: | -356.9 | 318.9                | 316.5  | -284.082938 | 81.2         |
| val+03_13: | 74.8   | 315.7                | 313.2  | -283.918144 | 84.9         |
| val+03_14: | -12.5  | 320.4                | 318.1  | -283.951937 | 81.2         |
| val+03_15: | -40.6  | 322.8                | 320.1  | -283.962894 | 89.3         |
| val+03_16: | -110.2 | 321.4                | 319.0  | -283.989241 | 83.4         |
| val+03_17: | -60.1  | 318.2                | 315.6  | -283.969813 | 87.2         |
| val+03_18: | -145.3 | 318.2                | 315.8  | -284.002267 | 83.8         |
| val+03_19: | -27.5  | 321.8                | 319.6  | -283.957781 | 79.1         |
| val+03_1:  | -132.6 | 315.6                | 313.1  | -283.997120 | 83.7         |
| val+03_20: | -169.1 | 314.3                | 312.2  | -284.010885 | 77.5         |
| val+03_21: | -38.2  | 323.7                | 321.4  | -283.962085 | 80.5         |
| val+03_22: | -311.9 | 316.9                | 314.8  | -284.065559 | 75.6         |
| val+03_24: | -52.2  | 323.5                | 321.1  | -283.967403 | 82.5         |
| val+03_25: | -153.6 | 329.8                | 327.5  | -284.006725 | 82.0         |
| val+03_27: | -102.6 | 317.3                | 314.9  | -283.985869 | 82.8         |
| val+03_28: | -350.4 | 307.3                | 305.2  | -284.079121 | 76.4         |
| val+03_29: | 102.0  | 326.9                | 324.4  | -283.909053 | 85.0         |
| val+03_2:  | -30.8  | 307.5                | 305.1  | -283.957436 | 83.0         |
| val+03_30: | 85.9   | 319.7                | 317.4  | -283.914345 | 80.1         |
| val+03_31: | -55.3  | 316.3                | 314.1  | -283.967739 | 76.9         |
| val+03_32: | -174.6 | 319.9                | 317.7  | -284.013605 | 78.7         |
| val+03_33: | -384.4 | 316.1                | 314.0  | -284.093091 | 76.8         |
| val+03_34: | -329.4 | 319.0                | 316.7  | -284.072455 | 81.7         |
| val+03_35: | -256.2 | 315.0                | 312.7  | -284.044127 | 81.9         |
| val+03_36: | -447.0 | 318.2                | 316.0  | -284.117178 | 78.6         |
| val+03_37: | -417.7 | 318.6                | 316.2  | -284.106054 | 81.5         |
| val+03_38: | -404.2 | 313.4                | 311.2  | -284.100331 | 77.9         |
| val+03_39: | -221.1 | 325.2                | 322.9  | -284.031918 | 80.7         |
| val+03_3:  | -164.3 | 312.8                | 310.3  | -284.008885 | 84.9         |
| val+03_40: | -149.4 | 311.0                | 308.8  | -284.002998 | 79.2         |
| val+03_41: | -121.5 | 324.4                | 322.2  | -283.993875 | 77.8         |
| val+03_42: | -154.0 | 316.1                | 313.9  | -284.005314 | 77.6         |

Supplementary Material (ESI) for PCCP  
This journal is © the Owner Societies 2011

|             |        |       |       |             |       |
|-------------|--------|-------|-------|-------------|-------|
| val+03_43:  | -367.5 | 314.6 | 312.4 | -284.086458 | 76.1  |
| val+03_44:  | -190.1 | 317.3 | 315.0 | -284.019212 | 78.2  |
| val+03_45:  | -214.7 | 314.8 | 312.7 | -284.028296 | 75.6  |
| val+03_46:  | -252.4 | 318.7 | 316.4 | -284.043079 | 80.2  |
| val+03_47:  | -430.6 | 314.7 | 312.4 | -284.110510 | 79.5  |
| val+03_48:  | -104.9 | 320.2 | 318.0 | -283.987083 | 77.9  |
| val+03_49:  | -78.2  | 316.3 | 314.1 | -283.976458 | 76.2  |
| val+03_4:   | -308.1 | 311.0 | 308.5 | -284.063425 | 85.5  |
| val+03_50:  | 15.3   | 307.1 | 305.0 | -283.939834 | 75.6  |
| val+03_51:  | -89.6  | 301.3 | 299.2 | -283.979098 | 73.8  |
| val+03_52:  | -108.1 | 310.7 | 308.6 | -283.987238 | 74.1  |
| val+03_53:  | -105.7 | 303.2 | 301.3 | -283.985476 | 69.3  |
| val+03_54:  | -122.6 | 302.7 | 300.9 | -283.991864 | 69.2  |
| val+03_55:  | -256.2 | 296.7 | 294.9 | -284.042043 | 67.9  |
| val+03_56:  | -272.3 | 302.6 | 300.4 | -284.048862 | 78.1  |
| val+03_57:  | -31.5  | 305.0 | 302.7 | -283.957411 | 78.5  |
| val+03_58:  | -129.4 | 306.0 | 303.8 | -283.994811 | 76.8  |
| val+03_59:  | 140.8  | 306.7 | 304.5 | -283.891973 | 77.3  |
| val+03_5:   | -306.3 | 316.6 | 314.0 | -284.063377 | 87.5  |
| val+03_60:  | 1.1    | 299.4 | 297.5 | -283.944355 | 70.2  |
| val+03_61:  | -75.8  | 297.7 | 295.8 | -283.973469 | 69.2  |
| val+03_62:  | -94.8  | 306.3 | 304.3 | -283.981669 | 72.9  |
| val+03_63:  | -270.4 | 304.3 | 302.0 | -284.048334 | 79.2  |
| val+03_64:  | -170.7 | 302.2 | 300.0 | -284.010105 | 77.6  |
| val+03_65:  | -244.2 | 303.2 | 301.0 | -284.038218 | 77.6  |
| val+03_66:  | -99.6  | 312.1 | 309.8 | -283.984158 | 81.1  |
| val+03_67:  | -266.2 | 296.8 | 294.6 | -284.045867 | 76.9  |
| val+03_68:  | 111.1  | 299.1 | 297.2 | -283.902438 | 70.7  |
| val+03_69:  | 22.7   | 307.5 | 305.6 | -283.937032 | 70.0  |
| val+03_6:   | -320.8 | 313.0 | 310.7 | -284.068502 | 79.9  |
| val+03_70:  | -40.5  | 307.7 | 305.6 | -283.961154 | 74.9  |
| val+03_71:  | -91.4  | 310.4 | 308.4 | -283.980838 | 72.3  |
| val+03_72:  | -26.1  | 299.9 | 298.0 | -283.954777 | 72.0  |
| val+03_73:  | -31.5  | 307.7 | 305.7 | -283.957736 | 74.1  |
| val+03_74:  | -70.9  | 311.3 | 309.3 | -283.973150 | 74.1  |
| val+03_75:  | -262.0 | 294.0 | 292.2 | -284.043948 | 68.1  |
| val+03_76:  | 30.6   | 296.9 | 295.1 | -283.932838 | 67.5  |
| val+03_77:  | -35.7  | 295.3 | 293.8 | -283.957903 | 62.5  |
| val+03_78:  | -34.7  | 295.9 | 294.2 | -283.957595 | 63.5  |
| val+03_79:  | -131.9 | 289.5 | 287.9 | -283.993879 | 61.4  |
| val+03_7:   | -182.7 | 318.3 | 316.0 | -284.016497 | 80.6  |
| val+03_80:  | 202.3  | 308.3 | 306.2 | -283.868737 | 75.4  |
| val+03_81:  | 147.3  | 297.4 | 295.5 | -283.888425 | 70.1  |
| val+03_82:  | 27.4   | 308.6 | 306.5 | -283.935388 | 74.6  |
| val+03_83:  | 44.2   | 299.8 | 298.0 | -283.928000 | 69.4  |
| val+03_84:  | -100.2 | 304.3 | 302.0 | -283.983500 | 79.8  |
| val+03_8:   | -321.4 | 313.1 | 310.9 | -284.068721 | 78.2  |
| val+03_9:   | -308.4 | 306.2 | 304.0 | -284.063009 | 78.4  |
| val+05_100: | -438.5 | 321.6 | 319.3 | -284.114319 | 80.4  |
| val+05_103: | -224.2 | 305.4 | 303.2 | -284.030832 | 76.3  |
| val+05_105: | -168.5 | 307.4 | 305.1 | -284.009846 | 78.8  |
| val+05_106: | -321.7 | 383.5 | 380.6 | -284.076837 | 94.7  |
| val+05_107: | -172.8 | 388.1 | 385.3 | -284.020674 | 93.6  |
| val+05_108: | -151.1 | 305.2 | 303.1 | -284.002998 | 74.8  |
| val+05_109: | -152.3 | 316.9 | 314.7 | -284.004753 | 76.0  |
| val+05_10:  | -233.0 | 367.1 | 364.3 | -284.041191 | 93.5  |
| val+05_110: | -273.1 | 360.0 | 357.0 | -284.055677 | 99.4  |
| val+05_112: | -24.4  | 301.2 | 299.4 | -283.954273 | 68.4  |
| val+05_113: | -22.0  | 310.4 | 308.1 | -283.954414 | 78.9  |
| val+05_114: | 22.5   | 296.3 | 294.5 | -283.935869 | 66.7  |
| val+05_115: | -26.5  | 293.3 | 291.6 | -283.954163 | 64.2  |
| val+05_116: | 0.5    | 320.9 | 318.6 | -283.947011 | 78.6  |
| val+05_117: | -414.8 | 313.9 | 311.6 | -284.104427 | 81.4  |
| val+05_118: | -411.3 | 307.1 | 305.1 | -284.102304 | 71.4  |
| val+05_119: | -294.2 | 426.5 | 422.9 | -284.071248 | 113.8 |
| val+05_11:  | -220.2 | 357.3 | 354.4 | -284.035226 | 95.3  |
| val+05_120: | -436.5 | 371.4 | 368.8 | -284.119191 | 88.9  |
| val+05_122: | -349.1 | 353.4 | 350.7 | -284.083876 | 90.8  |
| val+05_123: | -289.1 | 359.9 | 356.7 | -284.061744 | 101.4 |
| val+05_125: | -353.5 | 362.8 | 360.3 | -284.086603 | 84.1  |
| val+05_127: | -107.3 | 320.6 | 318.5 | -283.988062 | 77.0  |
| val+05_128: | -363.5 | 363.4 | 360.7 | -284.090479 | 90.1  |
| val+05_129: | -9.6   | 317.3 | 315.1 | -283.950460 | 77.8  |
| val+05_12:  | -414.8 | 314.0 | 311.7 | -284.104422 | 81.4  |
| val+05_130: | -251.7 | 375.3 | 372.4 | -284.049247 | 97.3  |
| val+05_131: | -293.4 | 443.9 | 440.2 | -284.072924 | 114.3 |
| val+05_132: | -289.0 | 382.7 | 379.6 | -284.064324 | 99.4  |

Supplementary Material (ESI) for PCCP  
This journal is © the Owner Societies 2011

|             |        |       |       |             |       |
|-------------|--------|-------|-------|-------------|-------|
| val+05_133: | -121.2 | 307.5 | 305.3 | -283.991865 | 75.4  |
| val+05_134: | -256.2 | 314.5 | 312.1 | -284.044051 | 81.7  |
| val+05_135: | -121.0 | 315.6 | 313.6 | -283.992698 | 72.6  |
| val+05_136: | -122.9 | 309.8 | 307.8 | -283.992746 | 72.0  |
| val+05_137: | 80.8   | 313.4 | 310.9 | -283.915592 | 84.0  |
| val+05_139: | 64.3   | 385.3 | 382.0 | -283.930037 | 104.1 |
| val+05_13:  | -271.5 | 303.0 | 300.9 | -284.048609 | 76.0  |
| val+05_140: | -22.6  | 348.6 | 345.6 | -283.958946 | 97.4  |
| val+05_141: | -163.7 | 345.1 | 342.2 | -284.012300 | 93.0  |
| val+05_143: | 83.9   | 367.4 | 364.2 | -283.920532 | 103.3 |
| val+05_144: | -33.4  | 333.8 | 331.2 | -283.961385 | 87.5  |
| val+05_145: | -202.1 | 313.1 | 310.9 | -284.023302 | 78.6  |
| val+05_146: | 92.8   | 322.9 | 320.3 | -283.912113 | 88.5  |
| val+05_147: | -89.0  | 314.7 | 312.2 | -283.980405 | 84.2  |
| val+05_148: | -171.5 | 314.5 | 312.2 | -284.011807 | 80.9  |
| val+05_149: | -20.0  | 315.7 | 313.3 | -283.954253 | 81.9  |
| val+05_150: | -194.0 | 306.7 | 304.4 | -284.019499 | 80.5  |
| val+05_152: | -45.4  | 328.2 | 325.4 | -283.965353 | 91.8  |
| val+05_153: | -15.2  | 318.7 | 316.2 | -283.952751 | 84.2  |
| val+05_154: | -50.9  | 316.8 | 314.5 | -283.966116 | 79.9  |
| val+05_155: | 72.1   | 317.4 | 315.0 | -283.919344 | 82.2  |
| val+05_156: | -201.6 | 308.6 | 306.4 | -284.022614 | 79.4  |
| val+05_157: | 197.5  | 327.2 | 324.5 | -283.872684 | 89.1  |
| val+05_158: | 148.6  | 320.2 | 317.8 | -283.890541 | 83.1  |
| val+05_159: | 111.7  | 320.6 | 318.3 | -283.904626 | 79.9  |
| val+05_15:  | -256.2 | 315.5 | 313.2 | -284.044192 | 81.9  |
| val+05_160: | -8.3   | 323.9 | 321.6 | -283.950706 | 80.6  |
| val+05_161: | -35.2  | 335.8 | 333.2 | -283.962332 | 89.1  |
| val+05_162: | 237.9  | 329.7 | 327.2 | -283.857622 | 85.9  |
| val+05_16:  | -447.1 | 318.3 | 316.1 | -284.117192 | 78.6  |
| val+05_17:  | 223.9  | 304.4 | 302.1 | -283.860081 | 80.4  |
| val+05_18:  | 183.9  | 307.8 | 305.5 | -283.875668 | 79.9  |
| val+05_19:  | 80.9   | 297.9 | 296.0 | -283.913800 | 71.1  |
| val+05_1:   | 210.4  | 369.9 | 367.0 | -283.872639 | 95.4  |
| val+05_20:  | -158.5 | 306.6 | 304.5 | -284.005977 | 76.2  |
| val+05_21:  | 177.9  | 298.8 | 296.8 | -283.876929 | 72.8  |
| val+05_22:  | -185.1 | 319.8 | 317.4 | -284.017597 | 82.0  |
| val+05_23:  | -245.6 | 355.8 | 353.3 | -284.044716 | 87.1  |
| val+05_24:  | 111.4  | 307.3 | 305.2 | -283.903247 | 75.1  |
| val+05_27:  | -151.1 | 304.8 | 302.8 | -284.002952 | 74.7  |
| val+05_28:  | -71.8  | 307.2 | 304.8 | -283.973007 | 81.2  |
| val+05_29:  | 24.7   | 303.0 | 300.9 | -283.935777 | 75.1  |
| val+05_2:   | -85.6  | 321.0 | 318.6 | -283.979823 | 82.2  |
| val+05_30:  | 138.9  | 309.0 | 306.8 | -283.892962 | 77.5  |
| val+05_31:  | 113.3  | 319.9 | 317.3 | -283.903961 | 85.3  |
| val+05_32:  | 152.7  | 321.3 | 318.8 | -283.889094 | 85.8  |
| val+05_33:  | 287.8  | 300.3 | 298.2 | -283.835239 | 74.8  |
| val+05_34:  | -86.2  | 350.8 | 348.1 | -283.983460 | 90.6  |
| val+05_35:  | 136.9  | 299.8 | 297.8 | -283.892673 | 72.8  |
| val+05_36:  | 79.3   | 312.3 | 310.2 | -283.916036 | 74.0  |
| val+05_37:  | -197.4 | 353.2 | 350.4 | -284.026056 | 92.6  |
| val+05_38:  | 70.7   | 316.3 | 313.9 | -283.919753 | 84.5  |
| val+05_39:  | -144.5 | 363.0 | 359.7 | -284.007038 | 103.1 |
| val+05_40:  | 22.6   | 312.1 | 309.8 | -283.937610 | 81.2  |
| val+05_41:  | -156.3 | 308.9 | 306.5 | -284.005405 | 83.1  |
| val+05_42:  | 77.3   | 303.9 | 301.6 | -283.915831 | 81.0  |
| val+05_43:  | 230.6  | 301.1 | 298.7 | -283.857139 | 81.6  |
| val+05_44:  | -92.4  | 303.8 | 301.3 | -283.980452 | 83.4  |
| val+05_45:  | -303.7 | 314.3 | 311.7 | -284.062122 | 87.5  |
| val+05_46:  | -240.9 | 308.7 | 306.4 | -284.037584 | 79.4  |
| val+05_47:  | -101.2 | 312.2 | 309.9 | -283.984778 | 81.3  |
| val+05_48:  | -262.2 | 304.3 | 302.1 | -284.045215 | 78.5  |
| val+05_49:  | -47.0  | 339.9 | 337.0 | -283.967259 | 94.7  |
| val+05_4:   | -104.8 | 361.0 | 357.8 | -283.991697 | 102.9 |
| val+05_50:  | -224.4 | 387.9 | 384.6 | -284.040312 | 105.3 |
| val+05_51:  | -127.9 | 313.1 | 310.6 | -283.995026 | 85.2  |
| val+05_52:  | -55.7  | 304.1 | 302.0 | -283.966526 | 75.2  |
| val+05_53:  | -30.8  | 317.1 | 314.9 | -283.958517 | 77.8  |
| val+05_54:  | -127.1 | 310.9 | 308.7 | -283.994483 | 77.2  |
| val+05_55:  | -57.5  | 311.9 | 309.4 | -283.968090 | 84.8  |
| val+05_56:  | -121.6 | 305.3 | 303.0 | -283.991737 | 78.4  |
| val+05_58:  | -296.5 | 322.5 | 320.1 | -284.060324 | 82.6  |
| val+05_5:   | -251.2 | 327.2 | 324.6 | -284.043602 | 88.3  |
| val+05_61:  | -123.7 | 308.1 | 306.0 | -283.992877 | 75.8  |
| val+05_62:  | 278.2  | 311.7 | 309.5 | -283.840199 | 76.5  |
| val+05_63:  | -99.0  | 315.5 | 313.1 | -283.984308 | 81.7  |
| val+05_64:  | 135.9  | 315.8 | 313.5 | -283.894869 | 80.5  |

Supplementary Material (ESI) for PCCP  
This journal is © the Owner Societies 2011

|             |        |       |       |             |       |
|-------------|--------|-------|-------|-------------|-------|
| val+05_65:  | -430.5 | 315.2 | 312.9 | -284.110550 | 79.4  |
| val+05_67:  | -110.4 | 376.0 | 373.3 | -283.995526 | 90.1  |
| val+05_69:  | -97.9  | 333.2 | 330.7 | -283.985887 | 85.2  |
| val+05_6:   | -228.2 | 309.9 | 307.7 | -284.032890 | 78.9  |
| val+05_70:  | 234.1  | 310.3 | 308.2 | -283.856832 | 76.6  |
| val+05_71:  | 150.9  | 315.9 | 313.6 | -283.889185 | 79.9  |
| val+05_72:  | -55.8  | 304.5 | 302.4 | -283.966587 | 75.3  |
| val+05_73:  | -339.5 | 402.8 | 400.0 | -284.085825 | 95.0  |
| val+05_74:  | -349.1 | 353.0 | 350.2 | -284.083814 | 90.8  |
| val+05_76:  | -120.2 | 310.7 | 308.7 | -283.991845 | 72.1  |
| val+05_77:  | -152.0 | 322.0 | 319.7 | -284.005229 | 78.6  |
| val+05_78:  | -413.0 | 315.2 | 313.0 | -284.103868 | 77.3  |
| val+05_79:  | -359.8 | 319.8 | 317.6 | -284.084119 | 76.9  |
| val+05_7:   | -307.0 | 318.2 | 315.9 | -284.063824 | 80.8  |
| val+05_80:  | -290.4 | 352.3 | 349.5 | -284.061389 | 94.6  |
| val+05_81:  | -290.4 | 352.7 | 349.8 | -284.061434 | 94.6  |
| val+05_83:  | -213.3 | 317.3 | 315.2 | -284.028041 | 74.2  |
| val+05_84:  | 239.6  | 309.5 | 307.4 | -283.854671 | 74.7  |
| val+05_85:  | -39.5  | 376.8 | 374.3 | -283.968628 | 85.6  |
| val+05_86:  | 178.8  | 314.5 | 312.3 | -283.878400 | 77.9  |
| val+05_88:  | -100.2 | 304.4 | 302.1 | -283.983522 | 79.8  |
| val+05_8:   | -111.5 | 380.2 | 377.1 | -283.996428 | 99.5  |
| val+05_90:  | -42.1  | 304.5 | 302.4 | -283.961381 | 75.4  |
| val+05_91:  | 67.3   | 298.2 | 296.1 | -283.919009 | 76.6  |
| val+05_92:  | -168.3 | 317.4 | 315.2 | -284.010898 | 77.5  |
| val+05_93:  | -113.5 | 324.5 | 322.0 | -283.990846 | 85.0  |
| val+05_94:  | 18.5   | 315.0 | 312.6 | -283.939503 | 82.0  |
| val+05_95:  | -311.0 | 365.9 | 363.0 | -284.070793 | 96.5  |
| val+05_96:  | -141.8 | 321.0 | 318.5 | -284.001252 | 83.8  |
| val+05_97:  | -91.8  | 327.4 | 324.9 | -283.982912 | 85.9  |
| val+05_98:  | -347.1 | 361.2 | 357.9 | -284.083989 | 102.5 |
| val+05_99:  | -162.9 | 312.2 | 309.7 | -284.008254 | 84.2  |
| val+05_9:   | -306.9 | 317.1 | 314.8 | -284.063677 | 80.6  |
| val+07_100: | -251.1 | 326.4 | 323.8 | -284.043493 | 88.2  |
| val+07_101: | 122.7  | 319.4 | 317.4 | -283.900332 | 74.7  |
| val+07_102: | -89.2  | 308.8 | 306.5 | -283.979812 | 78.7  |
| val+07_103: | 67.3   | 297.8 | 295.7 | -283.918966 | 76.5  |
| val+07_104: | -47.6  | 296.9 | 294.9 | -283.962618 | 73.6  |
| val+07_105: | 67.2   | 298.3 | 296.2 | -283.919051 | 76.6  |
| val+07_106: | 22.5   | 312.7 | 310.3 | -283.937705 | 81.4  |
| val+07_109: | -80.9  | 314.9 | 312.7 | -283.977353 | 77.4  |
| val+07_10:  | -145.2 | 315.9 | 313.6 | -284.001949 | 80.2  |
| val+07_110: | -330.1 | 372.7 | 369.9 | -284.078840 | 92.7  |
| val+07_111: | -120.6 | 367.9 | 364.8 | -283.998493 | 100.8 |
| val+07_113: | -96.6  | 307.7 | 305.7 | -283.982521 | 73.9  |
| val+07_114: | -349.1 | 353.8 | 351.1 | -284.083927 | 90.9  |
| val+07_115: | -254.1 | 311.7 | 309.2 | -284.042949 | 84.8  |
| val+07_116: | -303.4 | 313.3 | 310.7 | -284.061905 | 86.7  |
| val+07_117: | -107.6 | 344.6 | 341.8 | -283.990881 | 92.6  |
| val+07_118: | -294.1 | 429.5 | 425.8 | -284.071560 | 113.8 |
| val+07_119: | -289.0 | 378.9 | 375.9 | -284.063869 | 99.1  |
| val+07_11:  | -191.2 | 314.1 | 311.8 | -284.019278 | 80.1  |
| val+07_120: | -152.2 | 318.5 | 316.4 | -284.004898 | 77.1  |
| val+07_121: | -121.2 | 307.1 | 305.0 | -283.991824 | 75.3  |
| val+07_122: | 110.0  | 307.5 | 305.3 | -283.903811 | 77.4  |
| val+07_123: | 0.5    | 323.1 | 320.9 | -283.947275 | 78.8  |
| val+07_124: | -24.3  | 301.3 | 299.5 | -283.954264 | 68.6  |
| val+07_125: | 147.2  | 296.6 | 294.6 | -283.888402 | 72.4  |
| val+07_126: | -292.7 | 446.7 | 443.1 | -284.073000 | 113.8 |
| val+07_128: | -175.3 | 317.6 | 315.4 | -284.013620 | 78.8  |
| val+07_129: | -92.9  | 304.2 | 302.1 | -283.980717 | 74.5  |
| val+07_130: | -251.5 | 367.8 | 364.8 | -284.048355 | 97.3  |
| val+07_131: | -92.4  | 329.1 | 326.6 | -283.983337 | 86.2  |
| val+07_134: | -307.1 | 320.2 | 317.8 | -284.064099 | 81.0  |
| val+07_135: | -108.5 | 308.4 | 306.5 | -283.987116 | 70.3  |
| val+07_136: | -256.2 | 315.9 | 313.5 | -284.044239 | 81.9  |
| val+07_137: | -44.9  | 320.2 | 318.0 | -283.964234 | 78.3  |
| val+07_138: | 209.0  | 300.5 | 298.3 | -283.865315 | 78.8  |
| val+07_139: | 111.7  | 303.0 | 300.9 | -283.902626 | 74.3  |
| val+07_13:  | -167.3 | 374.1 | 371.3 | -284.016992 | 92.3  |
| val+07_140: | -209.6 | 317.6 | 315.4 | -284.026665 | 78.6  |
| val+07_141: | -353.0 | 358.2 | 355.8 | -284.085914 | 84.3  |
| val+07_143: | -13.5  | 324.7 | 322.4 | -283.952777 | 81.5  |
| val+07_144: | -193.8 | 320.4 | 318.2 | -284.020978 | 77.5  |
| val+07_145: | -44.5  | 377.8 | 374.4 | -283.970634 | 107.3 |
| val+07_146: | -166.8 | 381.0 | 377.5 | -284.017558 | 109.5 |
| val+07_148: | -120.6 | 368.0 | 364.9 | -283.998500 | 100.8 |

Supplementary Material (ESI) for PCCP  
This journal is © the Owner Societies 2011

|             |        |       |       |             |       |
|-------------|--------|-------|-------|-------------|-------|
| val+07_149: | -204.2 | 332.1 | 329.6 | -284.026268 | 84.4  |
| val+07_14:  | -181.3 | 377.9 | 375.0 | -284.022722 | 93.4  |
| val+07_150: | 67.2   | 298.1 | 295.9 | -283.919014 | 76.6  |
| val+07_151: | 18.5   | 314.8 | 312.4 | -283.939469 | 82.0  |
| val+07_152: | -384.9 | 313.5 | 311.3 | -284.092951 | 76.3  |
| val+07_153: | -108.9 | 319.3 | 317.3 | -283.988511 | 73.6  |
| val+07_154: | -23.7  | 310.6 | 308.4 | -283.955086 | 79.2  |
| val+07_155: | -123.7 | 308.4 | 306.3 | -283.992902 | 75.9  |
| val+07_158: | -63.1  | 394.3 | 391.5 | -283.979574 | 93.3  |
| val+07_15:  | -189.9 | 383.7 | 381.1 | -284.026687 | 89.8  |
| val+07_17:  | -242.7 | 308.4 | 306.1 | -284.038231 | 78.4  |
| val+07_18:  | -321.7 | 385.0 | 382.1 | -284.077015 | 94.7  |
| val+07_19:  | 222.0  | 320.8 | 318.2 | -283.862664 | 89.3  |
| val+07_1:   | -47.0  | 340.1 | 337.2 | -283.967304 | 94.7  |
| val+07_21:  | -389.4 | 311.8 | 309.7 | -284.094508 | 75.2  |
| val+07_22:  | -175.0 | 347.5 | 344.6 | -284.016879 | 94.2  |
| val+07_23:  | -30.7  | 318.5 | 316.3 | -283.958648 | 77.8  |
| val+07_24:  | -294.1 | 430.1 | 426.5 | -284.071624 | 113.8 |
| val+07_25:  | -296.0 | 452.4 | 448.7 | -284.074907 | 116.0 |
| val+07_26:  | -114.8 | 400.7 | 397.6 | -283.999992 | 98.5  |
| val+07_27:  | 143.2  | 316.2 | 314.0 | -283.892127 | 77.2  |
| val+07_29:  | 180.2  | 315.2 | 312.9 | -283.877951 | 81.6  |
| val+07_2:   | -225.2 | 381.9 | 378.6 | -284.039905 | 105.1 |
| val+07_30:  | -339.5 | 407.6 | 404.7 | -284.086360 | 95.0  |
| val+07_31:  | 129.1  | 313.2 | 310.9 | -283.897181 | 79.6  |
| val+07_32:  | -27.4  | 316.3 | 314.1 | -283.957122 | 78.4  |
| val+07_36:  | -313.6 | 423.1 | 419.6 | -284.078259 | 110.9 |
| val+07_39:  | -285.3 | 531.5 | 526.6 | -284.079780 | 145.3 |
| val+07_3:   | -128.0 | 313.8 | 311.3 | -283.995142 | 85.3  |
| val+07_41:  | -273.2 | 361.1 | 358.0 | -284.055826 | 99.5  |
| val+07_42:  | 136.8  | 389.6 | 386.7 | -283.902902 | 93.5  |
| val+07_44:  | -85.6  | 322.2 | 319.9 | -283.979969 | 82.4  |
| val+07_46:  | -139.0 | 307.5 | 305.3 | -283.998637 | 79.5  |
| val+07_47:  | 128.0  | 302.9 | 300.9 | -283.896404 | 71.7  |
| val+07_48:  | -304.9 | 376.0 | 372.7 | -284.069587 | 104.2 |
| val+07_49:  | 19.5   | 320.2 | 317.8 | -283.939697 | 81.6  |
| val+07_4:   | -389.5 | 311.8 | 309.7 | -284.094533 | 75.3  |
| val+07_50:  | -323.4 | 394.9 | 392.2 | -284.078811 | 89.1  |
| val+07_51:  | -124.0 | 316.7 | 314.4 | -283.993985 | 81.8  |
| val+07_52:  | 350.6  | 324.7 | 322.2 | -283.814103 | 84.1  |
| val+07_53:  | -62.4  | 376.9 | 373.9 | -283.977348 | 99.4  |
| val+07_54:  | -125.8 | 397.9 | 395.0 | -284.003874 | 96.4  |
| val+07_56:  | 19.5   | 323.8 | 321.4 | -283.940114 | 81.9  |
| val+07_57:  | 260.7  | 388.0 | 384.9 | -283.855538 | 100.0 |
| val+07_58:  | -94.0  | 319.3 | 317.0 | -283.982846 | 81.4  |
| val+07_59:  | 311.3  | 396.3 | 392.6 | -283.837217 | 116.1 |
| val+07_60:  | 11.8   | 349.1 | 346.1 | -283.945912 | 95.1  |
| val+07_61:  | 61.7   | 315.2 | 312.7 | -283.923084 | 83.9  |
| val+07_62:  | 22.6   | 311.9 | 309.5 | -283.937583 | 81.2  |
| val+07_63:  | -82.6  | 320.3 | 317.7 | -283.978611 | 86.9  |
| val+07_64:  | -44.1  | 364.8 | 361.4 | -283.968986 | 107.0 |
| val+07_65:  | -166.7 | 379.9 | 376.4 | -284.017405 | 109.4 |
| val+07_67:  | -295.1 | 452.9 | 449.2 | -284.074593 | 115.8 |
| val+07_69:  | -127.5 | 337.1 | 334.6 | -283.997623 | 84.8  |
| val+07_6:   | 12.1   | 314.8 | 312.1 | -283.941908 | 89.4  |
| val+07_73:  | -251.6 | 369.1 | 366.1 | -284.048532 | 97.3  |
| val+07_74:  | 64.1   | 371.4 | 368.5 | -283.928521 | 93.9  |
| val+07_75:  | -251.6 | 376.1 | 373.3 | -284.049316 | 94.8  |
| val+07_76:  | -30.8  | 315.7 | 313.5 | -283.958340 | 77.8  |
| val+07_78:  | -158.6 | 316.1 | 313.9 | -284.007098 | 78.0  |
| val+07_81:  | -289.0 | 376.8 | 373.7 | -284.063630 | 99.1  |
| val+07_83:  | -55.8  | 304.2 | 302.1 | -283.966571 | 75.3  |
| val+07_84:  | -347.6 | 379.9 | 377.2 | -284.086312 | 91.9  |
| val+07_85:  | 136.4  | 378.8 | 375.3 | -283.901843 | 109.9 |
| val+07_86:  | -172.2 | 320.9 | 318.7 | -284.012817 | 79.2  |
| val+07_87:  | 222.0  | 308.5 | 306.3 | -283.861244 | 77.2  |
| val+07_88:  | 180.2  | 316.8 | 314.5 | -283.878139 | 81.7  |
| val+07_89:  | -349.1 | 353.5 | 350.8 | -284.083873 | 90.9  |
| val+07_8:   | -149.9 | 317.5 | 314.9 | -284.003924 | 88.6  |
| val+07_90:  | 5.5    | 378.3 | 375.2 | -283.951650 | 99.9  |
| val+07_91:  | 64.1   | 373.6 | 370.7 | -283.928784 | 93.9  |
| val+07_92:  | -290.1 | 362.9 | 359.7 | -284.062464 | 102.3 |
| val+07_93:  | -411.4 | 304.5 | 302.5 | -284.102025 | 71.3  |
| val+07_95:  | -251.6 | 365.8 | 362.9 | -284.048161 | 97.3  |
| val+07_98:  | -76.7  | 310.7 | 308.5 | -283.975260 | 76.6  |
| val+07_9:   | 212.3  | 379.4 | 376.5 | -283.872987 | 95.0  |



|           |          |          |          |
|-----------|----------|----------|----------|
| val+03_10 |          |          |          |
| C         | 0.16008  | 0.12114  | -0.31727 |
| C         | -1.33528 | -0.01587 | -0.10275 |
| N         | 0.67214  | 1.28392  | -0.33041 |
| O         | 0.87616  | -1.01366 | -0.48614 |
| O         | -1.94299 | 1.24373  | 0.06675  |
| H         | -1.76660 | -0.54392 | -0.96788 |
| H         | -1.50693 | -0.65299 | 0.77916  |
| H         | 1.68272  | 1.25772  | -0.48231 |
| H         | 0.29976  | -1.79677 | -0.43992 |
| H         | -1.20527 | 1.88429  | -0.01092 |

|           |          |          |          |
|-----------|----------|----------|----------|
| val+03_12 |          |          |          |
| C         | 0.43177  | -0.34981 | 0.12132  |
| C         | -1.88180 | -0.63519 | -0.04278 |
| N         | -0.52438 | -1.16856 | -0.02610 |
| O         | 0.39824  | 1.00093  | 0.27346  |
| O         | 1.70519  | -0.79361 | 0.14283  |
| H         | -2.05467 | 0.05882  | -0.88008 |
| H         | -2.14701 | -0.11300 | 0.89009  |
| H         | -2.58833 | -1.46146 | -0.15945 |
| H         | -0.52156 | 1.31533  | 0.25766  |
| H         | 2.29676  | -0.03115 | 0.26294  |

|           |          |          |          |
|-----------|----------|----------|----------|
| val+03_13 |          |          |          |
| C         | -0.05135 | -0.98890 | 0.16905  |
| C         | 1.26009  | -1.12456 | -0.05096 |
| N         | -0.86858 | 0.04557  | -0.32413 |
| O         | -0.24489 | 1.18626  | -0.72391 |
| O         | 0.27942  | 1.95000  | 0.47296  |
| H         | -0.62270 | -1.72434 | 0.72944  |
| H         | 1.83046  | -0.40733 | -0.63284 |
| H         | 1.78656  | -1.98605 | 0.34233  |
| H         | -1.68243 | 0.26133  | 0.24894  |
| H         | 1.13723  | 1.50182  | 0.60193  |

|           |          |          |          |
|-----------|----------|----------|----------|
| val+03_14 |          |          |          |
| C         | 0.18732  | -0.72818 | -0.26816 |
| C         | 1.48633  | -1.01983 | -0.23122 |
| N         | -1.72206 | 0.47371  | 0.26287  |
| O         | -0.39805 | 0.07338  | 0.68292  |
| O         | -1.61996 | 1.79258  | -0.25472 |
| H         | -0.50627 | -1.10878 | -1.01374 |
| H         | 2.14447  | -0.61335 | 0.53039  |
| H         | 1.90567  | -1.69525 | -0.96780 |
| H         | -2.14070 | 0.65160  | 1.17750  |
| H         | -1.65454 | 1.65572  | -1.21735 |

|           |          |          |          |
|-----------|----------|----------|----------|
| val+03_15 |          |          |          |
| C         | -0.23768 | 0.46149  | -0.14357 |
| C         | 1.10676  | 0.37423  | -0.01736 |
| N         | -1.03916 | 1.46958  | 0.33564  |
| O         | 1.75321  | -0.68232 | -0.58453 |
| O         | 2.21550  | -1.64347 | 0.51172  |
| H         | -0.76316 | -0.34248 | -0.65318 |
| H         | 1.71832  | 1.11875  | 0.49232  |
| H         | -1.89898 | 1.63849  | -0.17060 |
| H         | -0.57933 | 2.32657  | 0.62043  |
| H         | 1.37502  | -2.11503 | 0.66704  |

|           |          |          |          |
|-----------|----------|----------|----------|
| val+03_16 |          |          |          |
| C         | 0.26101  | 0.08339  | 0.41542  |
| C         | 1.46167  | -0.10410 | -0.14229 |
| N         | -1.67096 | 1.27581  | -0.01941 |
| O         | -0.28716 | 1.34809  | 0.44284  |
| O         | 2.18774  | -1.26382 | -0.12644 |
| H         | -0.31633 | -0.70228 | 0.90091  |
| H         | 1.99112  | 0.70031  | -0.64262 |
| H         | -1.61063 | 1.58301  | -0.99516 |
| H         | -2.09172 | 2.06422  | 0.47647  |
| H         | 1.68196  | -1.95403 | 0.33538  |

|           |          |         |          |
|-----------|----------|---------|----------|
| val+03_17 |          |         |          |
| C         | -0.16917 | 0.45786 | 0.16333  |
| C         | 1.13218  | 0.25025 | -0.07462 |
| N         | -0.84535 | 1.67700 | 0.21150  |

Supplementary Material (ESI) for PCCP  
This journal is © the Owner Societies 2011

|   |          |          |          |
|---|----------|----------|----------|
| O | -1.10016 | -0.52123 | 0.48902  |
| O | -0.52357 | -1.83681 | 0.42552  |
| H | 1.76131  | 1.08378  | -0.36370 |
| H | 1.57771  | -0.72615 | 0.04551  |
| H | -1.73706 | 1.65829  | -0.27735 |
| H | -0.27633 | 2.44485  | -0.12839 |
| H | -0.62616 | -2.04794 | -0.52393 |

|           |          |          |          |
|-----------|----------|----------|----------|
| val+03_18 |          |          |          |
| C         | 0.14757  | -0.08728 | 0.12590  |
| C         | 1.47222  | -0.15949 | -0.05174 |
| N         | -1.58785 | 1.39802  | -0.36073 |
| O         | -0.44483 | 1.07757  | 0.50261  |
| O         | -0.74331 | -1.11168 | 0.06969  |
| H         | 2.06736  | 0.74409  | -0.02871 |
| H         | 1.97287  | -1.11162 | -0.18779 |
| H         | -2.39022 | 1.23047  | 0.25079  |
| H         | -1.50401 | 2.41515  | -0.41065 |
| H         | -0.30040 | -1.89443 | -0.29767 |

|           |          |          |          |
|-----------|----------|----------|----------|
| val+03_19 |          |          |          |
| C         | 0.97241  | -0.54126 | 0.14583  |
| C         | -1.30573 | -0.80760 | -0.22253 |
| N         | 0.03233  | -0.51580 | -0.70785 |
| O         | -2.26378 | 0.00715  | -0.87105 |
| O         | -2.06044 | 1.36826  | -0.40264 |
| H         | 0.82569  | -0.75265 | 1.21404  |
| H         | 1.99541  | -0.34757 | -0.18018 |
| H         | -1.40275 | -0.71204 | 0.86950  |
| H         | -1.58827 | -1.82074 | -0.53419 |
| H         | -1.37908 | 1.67655  | -1.03122 |

|          |          |          |          |
|----------|----------|----------|----------|
| val+03_1 |          |          |          |
| C        | -0.12274 | -0.41135 | -0.01681 |
| C        | 1.19463  | -0.51803 | -0.21647 |
| N        | -0.84939 | 0.80552  | 0.12187  |
| O        | 1.90725  | -1.69575 | -0.25176 |
| O        | -0.10613 | 1.90965  | -0.42036 |
| H        | -0.75201 | -1.28585 | 0.13950  |
| H        | 1.83477  | 0.34096  | -0.37255 |
| H        | -1.69703 | 0.76307  | -0.44569 |
| H        | 1.29971  | -2.43974 | -0.10436 |
| H        | -0.00426 | 2.49561  | 0.34772  |

|           |          |          |          |
|-----------|----------|----------|----------|
| val+03_20 |          |          |          |
| C         | 1.69154  | -0.12824 | 0.15393  |
| C         | -1.70330 | -0.54669 | -0.26652 |
| N         | 0.57777  | -0.18879 | -0.46129 |
| O         | -0.44644 | -0.64482 | 0.39239  |
| O         | -2.18720 | 0.76288  | -0.34627 |
| H         | 2.55369  | 0.18958  | -0.42463 |
| H         | 1.80752  | -0.37959 | 1.20869  |
| H         | -2.35421 | -1.20003 | 0.32469  |
| H         | -1.61207 | -0.90819 | -1.29305 |
| H         | -2.39669 | 1.05898  | 0.55517  |

|           |          |          |          |
|-----------|----------|----------|----------|
| val+03_21 |          |          |          |
| C         | 0.69892  | -0.58927 | -0.12708 |
| C         | -0.78468 | -0.64794 | 0.16688  |
| N         | 1.50882  | -1.57050 | -0.17986 |
| O         | -1.25835 | 0.50090  | 0.86530  |
| O         | -1.30149 | 1.59043  | -0.10391 |
| H         | 1.09325  | 0.41062  | -0.33440 |
| H         | -1.35538 | -0.77607 | -0.76301 |
| H         | -1.02030 | -1.48451 | 0.83485  |
| H         | 1.02109  | -2.45156 | 0.03042  |
| H         | -0.67807 | 2.21570  | 0.31001  |

|           |          |          |          |
|-----------|----------|----------|----------|
| val+03_22 |          |          |          |
| C         | 0.67909  | -0.24575 | -0.00924 |
| C         | -1.65686 | -0.56556 | -0.35805 |
| N         | 1.89135  | -0.42901 | -0.33287 |
| O         | -0.29762 | -0.90339 | -0.67668 |
| O         | -2.18332 | 0.38590  | -1.22766 |
| H         | 0.31451  | 0.40431  | 0.79583  |
| H         | -1.71158 | -0.25041 | -0.69137 |
| H         | -2.22182 | -1.48483 | -0.50927 |

Supplementary Material (ESI) for PCCP  
This journal is © the Owner Societies 2011

|           |          |          |          |
|-----------|----------|----------|----------|
| H         | 2.48621  | 0.12549  | 0.28479  |
| H         | -1.87017 | 1.26566  | -0.96022 |
| val+03_24 |          |          |          |
| C         | -0.06996 | -0.15952 | -0.11932 |
| C         | -2.37929 | -0.16024 | 0.09117  |
| N         | -1.12881 | -0.82612 | -0.24787 |
| O         | 1.12165  | -0.77944 | -0.41691 |
| O         | 2.18285  | 0.20099  | -0.32004 |
| H         | 0.05299  | 0.87782  | 0.20558  |
| H         | -2.25300 | 0.88341  | 0.41605  |
| H         | -3.04508 | -0.17628 | -0.77921 |
| H         | -2.88024 | -0.71539 | 0.89245  |
| H         | 2.63761  | -0.11123 | 0.48600  |
| val+03_25 |          |          |          |
| C         | 0.10580  | -0.30708 | 0.20101  |
| C         | -2.24173 | -0.26487 | 0.15429  |
| N         | 1.21716  | -0.66870 | 0.71615  |
| O         | -1.03423 | -0.66568 | 0.82003  |
| O         | 2.28711  | -0.17999 | -0.08063 |
| H         | 0.02927  | 0.28245  | -0.71520 |
| H         | -2.28566 | 0.82407  | 0.04627  |
| H         | -3.05984 | -0.60221 | 0.79078  |
| H         | -2.32148 | -0.73969 | -0.82934 |
| H         | 3.06299  | -0.51740 | 0.39415  |
| val+03_27 |          |          |          |
| C         | 0.22530  | 0.82699  | 0.13431  |
| C         | -1.23120 | 0.53564  | -0.05026 |
| N         | 0.73786  | 1.98104  | -0.00926 |
| O         | 1.07224  | -0.21181 | 0.47551  |
| O         | 0.36477  | -1.45885 | 0.71657  |
| H         | -1.73048 | 1.45999  | -0.34313 |
| H         | -1.67399 | 0.15564  | 0.87502  |
| H         | -1.38435 | -0.22561 | -0.82114 |
| H         | 1.74759  | 1.95518  | 0.17096  |
| H         | 0.63496  | -1.96702 | -0.07258 |
| val+03_28 |          |          |          |
| C         | 0.52542  | -0.27685 | -0.33822 |
| C         | -1.82801 | -0.55513 | -0.32931 |
| N         | 0.58688  | 0.80967  | 0.32444  |
| O         | -0.52965 | -1.02285 | -0.71563 |
| O         | 1.63461  | -0.88942 | -0.79967 |
| H         | -2.03253 | 0.42910  | -0.76313 |
| H         | -2.53239 | -1.28553 | -0.72620 |
| H         | -1.91748 | -0.51028 | 0.76098  |
| H         | -0.33074 | 1.15021  | 0.60411  |
| H         | 2.38669  | -0.33922 | -0.51888 |
| val+03_29 |          |          |          |
| C         | 0.25443  | -0.93504 | 0.21277  |
| C         | 1.41622  | -1.13666 | -0.41078 |
| N         | -1.51572 | 1.29972  | -0.40910 |
| O         | 0.04256  | 0.19807  | 0.94815  |
| O         | -1.40325 | 0.59527  | 0.78389  |
| H         | -0.55789 | -1.65850 | 0.24389  |
| H         | 2.19200  | -0.37755 | -0.42403 |
| H         | 1.62473  | -2.09478 | -0.87427 |
| H         | -2.23749 | 0.82530  | -0.95067 |
| H         | -1.83309 | 2.23558  | -0.15735 |
| val+03_2  |          |          |          |
| C         | 0.35578  | -0.90554 | -0.18451 |
| C         | 1.68854  | -0.97434 | -0.17804 |
| N         | -0.40100 | 0.24825  | -0.52850 |
| O         | -1.47691 | 0.32677  | 0.41504  |
| O         | 0.35867  | 1.42723  | -0.43228 |
| H         | -0.28388 | -1.75937 | 0.01085  |
| H         | 2.31531  | -0.11871 | -0.40200 |
| H         | 2.17628  | -1.92052 | 0.02802  |
| H         | -2.18455 | 0.74916  | -0.10279 |
| H         | 0.73897  | 1.43317  | 0.47429  |
| val+03_30 |          |          |          |
| C         | 1.82249  | 0.42505  | 0.10843  |

Supplementary Material (ESI) for PCCP  
 This journal is © the Owner Societies 2011

|   |          |          |          |
|---|----------|----------|----------|
| C | -2.14815 | -0.47223 | 0.16284  |
| N | 0.74256  | -0.06962 | -0.35541 |
| O | -1.46146 | 0.24426  | -0.86255 |
| O | -0.30263 | 0.85702  | -0.25716 |
| H | 1.90030  | 1.43235  | 0.51877  |
| H | 2.69942  | -0.21381 | 0.07910  |
| H | -2.45493 | 0.19556  | 0.97492  |
| H | -3.03056 | -0.87894 | -0.33975 |
| H | -1.53223 | -1.29034 | 0.55151  |

val+03\_31

|   |          |          |          |
|---|----------|----------|----------|
| C | 1.67483  | 0.55788  | -0.12379 |
| C | -1.52656 | -0.01320 | -0.02943 |
| N | 2.08824  | -0.62597 | 0.02297  |
| O | 0.46830  | 1.12163  | 0.20434  |
| O | -0.39649 | 0.13436  | 0.83309  |
| H | 2.28281  | 1.35103  | -0.56146 |
| H | -2.05109 | 0.93910  | -0.15360 |
| H | -2.16540 | -0.72479 | 0.50124  |
| H | -1.23517 | -0.42235 | -1.00195 |
| H | 1.35944  | -1.20020 | 0.45758  |

val+03\_32

|   |          |          |          |
|---|----------|----------|----------|
| C | 0.84321  | -1.30334 | -0.03648 |
| C | -0.54371 | -0.69537 | 0.02784  |
| N | -0.54246 | 0.46768  | 0.90615  |
| O | 1.25140  | -1.96285 | -0.96950 |
| O | 0.13537  | 1.52342  | 0.18007  |
| H | 1.46830  | -1.11783 | 0.86268  |
| H | -0.89861 | -0.48970 | -0.99219 |
| H | -1.21571 | -1.44165 | 0.47762  |
| H | -1.50201 | 0.80649  | 0.98504  |
| H | 0.80111  | 1.82604  | 0.81908  |

val+03\_33

|   |          |          |          |
|---|----------|----------|----------|
| C | 0.74012  | -1.04162 | 0.20958  |
| C | -1.47057 | 0.04038  | -0.04929 |
| N | -0.07323 | -0.13471 | -0.39205 |
| O | 1.95002  | -1.12423 | 0.03851  |
| O | -1.69416 | 0.87203  | 1.07413  |
| H | 0.18357  | -1.73126 | 0.87083  |
| H | -1.98779 | 0.41611  | -0.93795 |
| H | -1.88323 | -0.93553 | 0.21535  |
| H | 0.37963  | 0.56299  | -0.97360 |
| H | -1.49656 | 1.78663  | 0.81399  |

val+03\_34

|   |          |          |          |
|---|----------|----------|----------|
| C | 1.15781  | -0.87798 | 0.22633  |
| C | -0.28525 | -0.50600 | -0.11530 |
| N | -0.40905 | 0.89515  | -0.40337 |
| O | 2.10164  | -0.12288 | 0.15128  |
| O | -1.03443 | -1.00933 | 1.00101  |
| H | 1.27394  | -1.92541 | 0.56942  |
| H | -0.55783 | -1.06666 | -1.02249 |
| H | -1.36812 | 1.11830  | -0.66184 |
| H | -0.18419 | 1.44172  | 0.42655  |
| H | -1.96131 | -1.08600 | 0.72331  |

val+03\_35

|   |          |          |          |
|---|----------|----------|----------|
| C | 0.11992  | 1.01065  | -0.07911 |
| C | -1.38772 | 0.96262  | 0.01246  |
| N | 0.76566  | -0.20580 | -0.16877 |
| O | 0.78317  | 2.04195  | -0.02456 |
| O | 0.03520  | -1.30678 | -0.65340 |
| H | -1.75397 | 1.96203  | 0.25145  |
| H | -1.81402 | 0.63572  | -0.94186 |
| H | -1.71802 | 0.25148  | 0.77557  |
| H | 1.70525  | -0.17892 | -0.55622 |
| H | -0.00078 | -1.92155 | 0.10074  |

val+03\_36

|   |          |          |          |
|---|----------|----------|----------|
| C | 0.68368  | -0.09483 | 0.01524  |
| C | -1.46138 | 1.17186  | 0.22095  |
| N | -0.00974 | 1.05754  | 0.16445  |
| O | 1.89882  | -0.17599 | -0.12734 |
| O | -0.12919 | -1.18607 | 0.05864  |
| H | -1.71209 | 2.19092  | 0.52118  |

Supplementary Material (ESI) for PCCP  
This journal is © the Owner Societies 2011

|   |          |          |          |
|---|----------|----------|----------|
| H | -1.93110 | 0.96423  | -0.74816 |
| H | -1.86862 | 0.47979  | 0.96186  |
| H | 0.54056  | 1.89614  | 0.04963  |
| H | 0.45764  | -1.95710 | -0.03284 |

val+03\_37

|   |          |          |          |
|---|----------|----------|----------|
| C | 0.10039  | 0.03003  | -0.01472 |
| C | -1.42156 | -0.04450 | 0.15881  |
| N | 0.75376  | -1.13154 | -0.20097 |
| O | 0.65470  | 1.13329  | 0.02104  |
| O | -1.93241 | 1.25416  | 0.35219  |
| H | -1.86334 | -0.51294 | -0.73331 |
| H | -1.65693 | -0.69096 | 1.01706  |
| H | 1.75815  | -1.12675 | -0.31839 |
| H | 0.27727  | -2.02241 | -0.22153 |
| H | -1.13703 | 1.82653  | 0.30562  |

val+03\_38

|   |          |          |          |
|---|----------|----------|----------|
| C | 1.06425  | -0.01217 | 0.17588  |
| C | -0.41454 | 0.22087  | -0.09241 |
| N | -0.74848 | 1.63233  | 0.06127  |
| O | 1.88795  | 0.86938  | 0.27937  |
| O | 1.45460  | -1.30548 | 0.25554  |
| H | -1.00124 | -0.37064 | 0.62222  |
| H | -0.62418 | -0.20528 | -1.09088 |
| H | -1.70366 | 1.77739  | -0.26117 |
| H | -0.15279 | 2.17691  | -0.56059 |
| H | 0.69409  | -1.90621 | 0.16098  |

val+03\_39

|   |          |          |          |
|---|----------|----------|----------|
| C | 0.73878  | -1.01703 | 0.05654  |
| C | -1.42141 | 0.25739  | 0.17825  |
| N | 0.00510  | 0.11819  | -0.03686 |
| O | 1.93993  | -1.10951 | -0.16566 |
| O | 0.63216  | 1.26185  | -0.53665 |
| H | 0.11228  | -1.86403 | 0.38699  |
| H | -1.61792 | 0.99958  | 0.95889  |
| H | -1.91714 | 0.56646  | -0.74760 |
| H | -1.82162 | -0.70853 | 0.49457  |
| H | 1.09905  | 1.65223  | 0.22652  |

val+03\_3

|   |          |          |          |
|---|----------|----------|----------|
| C | -0.13063 | -0.47216 | -0.06985 |
| C | 1.18925  | -0.62007 | -0.24269 |
| N | -0.82515 | 0.74667  | 0.08785  |
| O | -1.04534 | -1.47911 | 0.05827  |
| O | -0.09124 | 1.84525  | -0.43834 |
| H | 1.82736  | 0.24562  | -0.34881 |
| H | 1.63471  | -1.60824 | -0.27597 |
| H | -1.70931 | 0.71403  | -0.42031 |
| H | -0.58258 | -2.32915 | -0.01632 |
| H | 0.04942  | 2.40916  | 0.34048  |

val+03\_40

|   |          |          |          |
|---|----------|----------|----------|
| C | -0.08016 | -0.73020 | 0.27193  |
| C | 1.33687  | -0.73403 | -0.30230 |
| N | -0.29789 | 0.60571  | 0.92126  |
| O | -1.30027 | 1.15977  | 0.51639  |
| O | -1.04112 | -1.02833 | -0.68587 |
| H | -0.13480 | -1.41649 | 1.13597  |
| H | 1.55225  | -1.72598 | -0.70793 |
| H | 1.41665  | 0.00241  | -1.10772 |
| H | 2.06957  | -0.50280 | 0.47604  |
| H | -1.70298 | -0.30505 | -0.61918 |

val+03\_41

|   |          |          |          |
|---|----------|----------|----------|
| C | -0.03913 | -0.71550 | 0.40338  |
| C | -1.35859 | -0.47280 | -0.34856 |
| N | 1.03696  | -0.92177 | -0.59341 |
| O | 1.88091  | -0.04785 | -0.58854 |
| O | -1.33940 | 0.72815  | -1.10367 |
| H | -0.11896 | -1.65444 | 0.96554  |
| H | 0.21598  | 0.11630  | 1.07013  |
| H | -2.17926 | -0.48873 | 0.38083  |
| H | -1.52618 | -1.28320 | -1.06416 |
| H | -1.34693 | 1.47184  | -0.47972 |

Supplementary Material (ESI) for PCCP  
This journal is © the Owner Societies 2011

|           |          |          |          |
|-----------|----------|----------|----------|
| val+03_42 |          |          |          |
| C         | 1.13911  | -1.03960 | -0.23193 |
| C         | -0.31880 | -1.12873 | 0.16671  |
| N         | -0.95597 | 1.05129  | -0.31587 |
| O         | 1.81469  | -0.03579 | -0.12833 |
| O         | -0.82146 | 0.05690  | 0.73353  |
| H         | 1.56306  | -1.98134 | -0.64166 |
| H         | -0.90040 | -1.44488 | -0.71358 |
| H         | -0.42208 | -1.91225 | 0.93041  |
| H         | -1.76836 | 1.58256  | 0.00207  |
| H         | -0.15200 | 1.66515  | -0.16534 |

|           |          |          |          |
|-----------|----------|----------|----------|
| val+03_43 |          |          |          |
| C         | -0.99775 | 1.15854  | -0.06946 |
| C         | -0.41676 | -1.14002 | -0.20866 |
| N         | 0.89180  | -1.11908 | 0.36735  |
| O         | -1.00536 | 1.13080  | 1.14387  |
| O         | -0.72838 | 0.13437  | -0.87935 |
| H         | -1.22259 | 2.05443  | -0.66741 |
| H         | -1.22222 | -1.31478 | 0.50899  |
| H         | -0.47544 | -1.86251 | -1.02134 |
| H         | 0.86281  | -0.99340 | 1.37355  |
| H         | 1.41419  | -1.96133 | 0.15237  |

|           |          |          |          |
|-----------|----------|----------|----------|
| val+03_44 |          |          |          |
| C         | 1.58864  | -0.39699 | 0.08704  |
| C         | -1.74659 | -0.31473 | 0.05463  |
| N         | 0.47061  | 0.38013  | 0.01908  |
| O         | 2.67178  | 0.00231  | 0.49056  |
| O         | -0.58626 | -0.09319 | -0.76319 |
| H         | 1.38187  | -1.43565 | -0.22289 |
| H         | -2.08190 | 0.61899  | 0.51998  |
| H         | -2.51078 | -0.68115 | -0.63428 |
| H         | -1.54369 | -1.06371 | 0.82712  |
| H         | 0.56262  | 1.39339  | 0.00885  |

|           |          |          |          |
|-----------|----------|----------|----------|
| val+03_45 |          |          |          |
| C         | 1.14268  | -1.13043 | 0.13597  |
| C         | -1.16543 | 1.25634  | -0.06898 |
| N         | -0.01505 | 0.79525  | 0.71208  |
| O         | 1.87664  | -1.83449 | -0.51259 |
| O         | 0.89777  | 0.14815  | -0.22662 |
| H         | 0.60828  | -1.41730 | 1.05383  |
| H         | -0.88585 | 1.85184  | -0.94743 |
| H         | -1.77469 | 1.86947  | 0.60264  |
| H         | -1.75410 | 0.39212  | -0.38699 |
| H         | 0.53316  | 1.60955  | 0.99228  |

|           |          |          |          |
|-----------|----------|----------|----------|
| val+03_46 |          |          |          |
| C         | 0.62831  | 0.97155  | 0.31925  |
| C         | -0.85546 | 0.80820  | 0.11509  |
| N         | 0.71322  | -1.38939 | 0.08801  |
| O         | 1.18946  | 2.03194  | 0.49854  |
| O         | 1.42087  | -0.13946 | 0.30626  |
| H         | -1.31240 | 1.79767  | 0.15674  |
| H         | -1.06640 | 0.33663  | -0.84845 |
| H         | -1.28522 | 0.16287  | 0.88592  |
| H         | 1.21520  | -1.78199 | -0.71097 |
| H         | 1.01232  | -1.94692 | 0.89061  |

|           |          |          |          |
|-----------|----------|----------|----------|
| val+03_47 |          |          |          |
| C         | 0.51019  | 0.15549  | 0.08216  |
| C         | -1.82302 | -0.12177 | -0.12821 |
| N         | 1.71812  | -0.37403 | -0.26673 |
| O         | 0.34786  | 1.11000  | 0.82775  |
| O         | -0.49918 | -0.55725 | -0.47614 |
| H         | -1.98763 | 0.91057  | -0.44727 |
| H         | -2.49805 | -0.79312 | -0.65918 |
| H         | -1.98476 | -0.19770 | 0.95017  |
| H         | 2.52641  | 0.20911  | -0.10330 |
| H         | 1.76307  | -0.99470 | -1.06336 |

|           |          |          |          |
|-----------|----------|----------|----------|
| val+03_48 |          |          |          |
| C         | -0.58169 | -1.11813 | -0.21479 |
| C         | 0.85209  | -1.31538 | 0.24735  |
| N         | -1.43608 | 1.06377  | -0.03736 |
| O         | -1.53638 | 2.12948  | -0.55445 |

Supplementary Material (ESI) for PCCP  
This journal is © the Owner Societies 2011

|           |          |          |          |
|-----------|----------|----------|----------|
| O         | -0.73187 | 0.17455  | -0.85885 |
| H         | -1.29053 | -1.16530 | 0.61709  |
| H         | -0.87143 | -1.85386 | -0.96957 |
| H         | 0.96480  | -2.31702 | 0.67633  |
| H         | 1.11965  | -0.57920 | 1.01232  |
| H         | 1.55035  | -1.21981 | -0.59027 |
| val+03_49 |          |          |          |
| C         | -0.42018 | -1.15221 | -0.03145 |
| C         | -1.01232 | 1.13820  | 0.02639  |
| N         | 0.94931  | -1.27946 | 0.57476  |
| O         | 1.67149  | -0.33143 | 0.35569  |
| O         | -0.66996 | -0.00570 | -0.76218 |
| H         | -1.10842 | -1.30224 | 0.81676  |
| H         | -0.49864 | -2.02620 | -0.69120 |
| H         | -0.17538 | 1.46218  | 0.65304  |
| H         | -1.88370 | 0.92662  | 0.66033  |
| H         | -1.26461 | 1.93325  | -0.67805 |
| val+03_4  |          |          |          |
| C         | -0.26416 | 0.01090  | 0.13402  |
| C         | 1.07266  | -0.11999 | 0.05809  |
| N         | -0.98316 | 1.20498  | 0.21243  |
| O         | -1.07707 | -1.08109 | 0.23110  |
| O         | 1.60513  | -1.40944 | 0.22911  |
| H         | 1.76183  | 0.71486  | -0.01617 |
| H         | -1.81697 | 1.18053  | -0.37043 |
| H         | -0.41907 | 2.01097  | -0.03945 |
| H         | -0.47068 | -1.84724 | 0.21322  |
| H         | 2.01539  | -1.68329 | -0.60831 |
| val+03_50 |          |          |          |
| C         | 0.56365  | -0.16627 | 0.04066  |
| C         | -0.12419 | 1.14389  | -0.02589 |
| N         | 1.05288  | 0.83491  | -0.87621 |
| O         | 0.04149  | -1.27448 | -0.65379 |
| O         | -0.85016 | -1.96410 | 0.26846  |
| H         | 1.14414  | -0.43890 | 0.92011  |
| H         | -1.05841 | 1.22873  | -0.57512 |
| H         | -0.00421 | 1.83060  | 0.80884  |
| H         | 1.90283  | 1.26167  | -0.50977 |
| H         | -1.70054 | -1.52866 | 0.06539  |
| val+03_51 |          |          |          |
| C         | 0.93713  | -0.08653 | -0.32955 |
| C         | 0.38395  | 1.25478  | -0.17520 |
| N         | 0.12338  | -1.26129 | -0.38510 |
| O         | 1.12282  | 0.62723  | 0.90461  |
| O         | -1.05823 | -1.10284 | 0.41698  |
| H         | 1.85008  | -0.24294 | -0.90491 |
| H         | -0.68209 | 1.36441  | 0.00974  |
| H         | 0.87632  | 2.10535  | -0.64556 |
| H         | 0.62497  | -2.03350 | 0.05618  |
| H         | -1.77103 | -1.20137 | -0.23559 |
| val+03_52 |          |          |          |
| C         | 0.56048  | 0.54335  | 0.40043  |
| C         | -0.41282 | -0.45906 | -0.16885 |
| N         | 0.11890  | 1.81659  | 0.90612  |
| O         | 0.84401  | 1.66055  | -0.40198 |
| O         | -0.92867 | -1.21388 | 0.92038  |
| H         | 1.40860  | 0.11577  | 0.93753  |
| H         | -1.20149 | 0.08210  | -0.71415 |
| H         | 0.11962  | -1.09627 | -0.88981 |
| H         | -0.85950 | 1.93955  | 0.61327  |
| H         | -1.40142 | -1.97630 | 0.55236  |
| val+03_53 |          |          |          |
| C         | -0.07233 | -0.27727 | -0.13103 |
| C         | -0.78065 | 1.03622  | 0.18187  |
| N         | 1.01373  | 0.52693  | -0.77601 |
| O         | 0.29702  | 1.78646  | -0.43629 |
| O         | -0.80048 | -1.07217 | -1.02200 |
| H         | 0.28171  | -0.86113 | 0.72586  |
| H         | -0.89669 | 1.28296  | 1.24272  |
| H         | -1.73318 | 1.16205  | -0.34388 |
| H         | 1.83062  | 0.54059  | -0.15617 |

Supplementary Material (ESI) for PCCP  
This journal is © the Owner Societies 2011

|           |          |          |          |
|-----------|----------|----------|----------|
| H         | -0.30906 | -1.89755 | -1.16678 |
| val+03_54 |          |          |          |
| C         | 0.20661  | -0.36025 | 0.10062  |
| C         | -0.60007 | 0.92433  | -0.03352 |
| N         | 0.61455  | 1.69043  | 0.39186  |
| O         | 1.32240  | 0.40317  | 0.64299  |
| O         | -0.34199 | -1.27213 | 0.99044  |
| H         | 0.50972  | -0.84971 | -0.83382 |
| H         | -0.98721 | 1.17229  | -1.02446 |
| H         | -1.39643 | 0.99615  | 0.71212  |
| H         | 1.07308  | 2.03978  | -0.45553 |
| H         | 0.11546  | -2.12295 | 0.89260  |
| val+03_55 |          |          |          |
| C         | 0.21494  | -0.81880 | 0.04334  |
| C         | 0.46825  | 1.15722  | -0.28888 |
| N         | -0.24333 | 0.37978  | 0.74192  |
| O         | 1.00743  | -0.04497 | -0.87938 |
| O         | -0.83664 | -1.51404 | -0.54136 |
| H         | 0.85165  | -1.49781 | 0.62469  |
| H         | -0.16765 | 1.72902  | -0.97798 |
| H         | 1.26306  | 1.80017  | 0.10631  |
| H         | -1.25665 | 0.46355  | 0.68275  |
| H         | -0.56335 | -2.43412 | -0.69132 |
| val+03_56 |          |          |          |
| C         | 0.40566  | -0.62291 | -0.33744 |
| C         | -0.26526 | 0.66773  | -0.29809 |
| N         | -0.27466 | -1.83996 | -0.56148 |
| O         | 0.23310  | 0.11952  | 0.92829  |
| O         | 0.39389  | 1.76456  | -0.82518 |
| H         | 1.44219  | -0.64072 | -0.66847 |
| H         | -1.35478 | 0.72734  | -0.34851 |
| H         | 0.20699  | -2.61795 | -0.11529 |
| H         | -1.22399 | -1.81155 | -0.19643 |
| H         | -0.02874 | 2.56875  | -0.48041 |
| val+03_57 |          |          |          |
| C         | 0.65456  | -0.06818 | -0.27306 |
| C         | -0.32144 | -1.12360 | 0.17090  |
| N         | 0.26098  | 1.28668  | -0.58607 |
| O         | 1.05783  | 0.91819  | 0.65332  |
| O         | -1.07888 | 1.48013  | -0.21661 |
| H         | 1.45144  | -0.42800 | -0.92907 |
| H         | -1.09108 | -0.70583 | 0.82006  |
| H         | 0.22420  | -1.90251 | 0.71408  |
| H         | -0.79287 | -1.58945 | -0.70147 |
| H         | -1.17913 | 2.44618  | -0.28428 |
| val+03_58 |          |          |          |
| C         | 0.68624  | -0.57790 | -0.01890 |
| C         | -0.79935 | 1.36876  | 0.14281  |
| N         | 0.48539  | 0.81925  | -0.29386 |
| O         | 1.23852  | 0.26971  | 0.92713  |
| O         | -0.33184 | -1.37484 | 0.45058  |
| H         | 1.37734  | -1.08827 | -0.69248 |
| H         | -0.62882 | 2.36617  | 0.55585  |
| H         | -1.32674 | 0.74411  | 0.86859  |
| H         | -1.40929 | 1.46911  | -0.76271 |
| H         | -0.45715 | -2.11231 | -0.16822 |
| val+03_59 |          |          |          |
| C         | -1.56559 | 0.61282  | 0.08652  |
| C         | -0.62361 | -0.52268 | -0.05518 |
| N         | -0.33805 | 0.57680  | 0.90772  |
| O         | 0.56414  | 1.53170  | 0.28327  |
| O         | 1.86568  | 1.28563  | 0.83873  |
| H         | -2.48462 | 0.52131  | 0.65799  |
| H         | -1.58312 | 1.34641  | -0.71496 |
| H         | -0.00685 | -0.55242 | -0.94857 |
| H         | -0.82821 | -1.47943 | 0.41655  |
| H         | 2.22413  | 0.62305  | 0.21613  |
| val+03_5  |          |          |          |
| C         | 0.70434  | 0.01293  | 0.11204  |
| C         | -0.63409 | -0.03075 | 0.12955  |



Supplementary Material (ESI) for PCCP  
This journal is © the Owner Societies 2011

|   |          |          |          |
|---|----------|----------|----------|
| N | -1.47156 | 1.11964  | 0.22772  |
| O | 1.38640  | 1.19265  | 0.21873  |
| O | 1.55893  | -1.06197 | 0.08231  |
| H | -1.14263 | -0.98910 | 0.16079  |
| H | -2.18107 | 1.10956  | -0.50425 |
| H | -0.91716 | 1.96305  | 0.09326  |
| H | 2.20842  | 1.11097  | -0.29605 |
| H | 1.08302  | -1.83248 | -0.26821 |

val+03\_60

|   |          |          |          |
|---|----------|----------|----------|
| C | -0.71910 | -0.73646 | 0.20514  |
| C | -1.62402 | 0.42843  | -0.18470 |
| N | 0.35594  | 0.26521  | 0.49688  |
| O | -0.47585 | 1.31611  | -0.17221 |
| O | 1.44086  | -0.02416 | -0.35533 |
| H | -0.43335 | -1.37630 | -0.63262 |
| H | -0.97805 | -1.33726 | 1.07927  |
| H | -2.10090 | 0.38332  | -1.16861 |
| H | -2.36241 | 0.71091  | 0.57337  |
| H | 2.18978  | 0.42121  | 0.07870  |

val+03\_61

|   |          |          |          |
|---|----------|----------|----------|
| C | 1.07981  | 0.97662  | -0.06888 |
| C | 0.96160  | -1.02937 | -0.08942 |
| N | 0.18196  | 0.03019  | -0.77309 |
| O | 1.98994  | -0.08700 | 0.26508  |
| O | -1.15160 | 0.10342  | -0.25783 |
| H | 0.59631  | 1.42463  | 0.81084  |
| H | 1.54177  | 1.74508  | -0.69832 |
| H | 1.33076  | -1.83376 | -0.73502 |
| H | 0.42776  | -1.43527 | 0.78154  |
| H | -1.69391 | 0.14505  | -1.06229 |

val+03\_62

|   |          |          |          |
|---|----------|----------|----------|
| C | -0.47531 | 1.56511  | -0.26021 |
| C | 0.39448  | -0.59874 | 0.42974  |
| N | 0.61308  | 0.64147  | -0.34804 |
| O | 0.60908  | 1.79499  | 0.61337  |
| O | -0.09856 | -1.58723 | -0.43681 |
| H | -1.40653 | 1.24214  | 0.20865  |
| H | -0.58318 | 2.26420  | -1.08903 |
| H | -0.34955 | -0.45360 | 1.22110  |
| H | 1.35675  | -0.87142 | 0.87866  |
| H | 0.62084  | -1.84432 | -1.03673 |

val+03\_63

|   |          |          |          |
|---|----------|----------|----------|
| C | 0.00905  | -0.07364 | 0.29153  |
| C | -0.42741 | 1.31594  | 0.34498  |
| N | -0.91284 | -1.15851 | 0.35068  |
| O | 0.05187  | 0.73611  | -0.90347 |
| O | 1.24161  | -0.36079 | 0.84740  |
| H | -1.49057 | 1.55574  | 0.36878  |
| H | 0.23061  | 2.06090  | 0.79071  |
| H | -0.53692 | -1.96855 | -0.14366 |
| H | -1.77624 | -0.90294 | -0.12462 |
| H | 1.64285  | -1.09676 | 0.35316  |

val+03\_64

|   |          |          |          |
|---|----------|----------|----------|
| C | 0.24973  | -0.04867 | 0.31805  |
| C | -0.89266 | -0.96903 | -0.03731 |
| N | 0.04052  | 1.25194  | 0.87152  |
| O | 0.48572  | 1.02791  | -0.55897 |
| O | 1.36726  | -0.66229 | 0.84272  |
| H | -1.73033 | -0.39878 | -0.44575 |
| H | -0.57015 | -1.69292 | -0.79465 |
| H | -1.22581 | -1.52053 | 0.84713  |
| H | -0.95705 | 1.48032  | 0.78010  |
| H | 1.47658  | -1.52766 | 0.41585  |

val+03\_65

|   |          |          |          |
|---|----------|----------|----------|
| C | -0.62934 | 0.40393  | -0.16082 |
| C | -0.01955 | -0.91181 | 0.12115  |
| N | 0.52221  | -0.08669 | -0.94997 |
| O | -0.43561 | 1.39626  | 0.79725  |
| O | -0.58967 | -2.10515 | -0.33124 |
| H | -1.55881 | 0.46358  | -0.72556 |
| H | 0.56205  | -0.99722 | 1.04086  |

Supplementary Material (ESI) for PCCP  
This journal is © the Owner Societies 2011

|   |          |          |          |
|---|----------|----------|----------|
| H | 1.37668  | 0.37195  | -0.63135 |
| H | -0.50461 | 2.25814  | 0.35367  |
| H | -1.21326 | -2.40488 | 0.35090  |

val+03\_66

|   |          |          |          |
|---|----------|----------|----------|
| C | -0.53974 | -0.32586 | 0.07010  |
| C | -1.09036 | 1.05099  | -0.00930 |
| N | 0.09617  | 0.63629  | -0.81163 |
| O | -1.12074 | -1.40145 | -0.59871 |
| O | 1.31917  | 1.08999  | -0.18618 |
| H | 0.03406  | -0.57874 | 0.96206  |
| H | -1.97236 | 1.25555  | -0.61018 |
| H | -0.90201 | 1.71640  | 0.82815  |
| H | -1.93707 | -1.63214 | -0.12504 |
| H | 1.69836  | 1.65668  | -0.87885 |

val+03\_67

|   |          |          |          |
|---|----------|----------|----------|
| C | 0.02883  | -0.24718 | -0.08914 |
| C | -0.44969 | 1.11904  | 0.18089  |
| N | 0.41596  | 0.79710  | -1.00917 |
| O | 0.95709  | -0.75900 | 0.81206  |
| O | -0.77162 | -1.21659 | -0.68132 |
| H | -1.47073 | 1.39295  | -0.07020 |
| H | -0.00061 | 1.66470  | 1.00692  |
| H | 1.37736  | 1.07234  | -0.80620 |
| H | 1.44291  | -1.46493 | 0.34910  |
| H | -1.26018 | -1.65932 | 0.03386  |

val+03\_68

|   |          |          |          |
|---|----------|----------|----------|
| C | 0.37409  | -0.00082 | 0.27145  |
| C | -0.43745 | -1.17980 | -0.19161 |
| N | -0.33527 | 1.20639  | 0.73589  |
| O | 1.00832  | 0.74980  | -0.80856 |
| O | 0.63793  | 1.97812  | -0.03970 |
| H | 1.13396  | -0.27896 | 1.01078  |
| H | -1.18012 | -0.87530 | -0.93538 |
| H | 0.22312  | -1.93095 | -0.63711 |
| H | -0.94542 | -1.64056 | 0.66231  |
| H | -1.19196 | 1.28469  | 0.17164  |

val+03\_69

|   |          |          |          |
|---|----------|----------|----------|
| C | 0.41464  | -0.14078 | -0.26558 |
| C | -0.50020 | -1.21209 | 0.26923  |
| N | 0.56867  | 1.79322  | 0.34666  |
| O | 1.19819  | 0.52791  | 0.74092  |
| O | -0.25367 | 1.07968  | -0.63695 |
| H | 1.05035  | -0.50832 | -1.08258 |
| H | -1.14682 | -1.58062 | -0.53474 |
| H | 0.09437  | -2.05352 | 0.64178  |
| H | -1.11843 | -0.81684 | 1.08049  |
| H | -0.09350 | 1.97446  | 1.11698  |

val+03\_6

|   |          |          |          |
|---|----------|----------|----------|
| C | 1.36821  | -0.08559 | -0.20847 |
| C | -0.10607 | 0.06145  | 0.14091  |
| N | 1.87339  | -0.90557 | -1.03754 |
| O | -0.50318 | 1.41675  | 0.07073  |
| O | -0.83193 | -0.76868 | -0.72823 |
| H | 2.02427  | 0.61312  | 0.31959  |
| H | -0.26491 | -0.21499 | 1.19166  |
| H | 1.11712  | -1.47831 | -1.43549 |
| H | -0.35556 | 1.71461  | -0.84426 |
| H | -1.75213 | -0.79400 | -0.41990 |

val+03\_70

|   |          |          |          |
|---|----------|----------|----------|
| C | 0.96628  | 0.26517  | -0.11404 |
| C | -1.40858 | -0.28996 | 0.16397  |
| N | -0.00003 | -0.68655 | 0.15723  |
| O | 0.68953  | 1.42703  | -0.89043 |
| O | 0.93477  | 1.46412  | 0.60410  |
| H | 1.95478  | -0.16024 | -0.28407 |
| H | -1.52888 | 0.57927  | 0.81387  |
| H | -1.99933 | -1.11246 | 0.57360  |
| H | -1.79095 | -0.03824 | -0.83375 |
| H | 0.18142  | -1.56303 | -0.31857 |

val+03\_71

Supplementary Material (ESI) for PCCP  
This journal is © the Owner Societies 2011

|   |          |          |          |
|---|----------|----------|----------|
| C | 0.70036  | 0.45409  | 0.09686  |
| C | -1.05435 | -1.09356 | -0.16824 |
| N | 0.51590  | 1.88607  | 0.09338  |
| O | 0.00276  | -0.33808 | -0.77697 |
| O | 1.72829  | 1.16523  | -0.48552 |
| H | 0.89027  | -0.00006 | 1.07241  |
| H | -1.85781 | -0.43767 | 0.18593  |
| H | -1.44010 | -1.75537 | -0.94426 |
| H | -0.67635 | -1.69357 | 0.66838  |
| H | -0.03257 | 2.08531  | -0.75406 |

val+03\_72

|   |          |          |          |
|---|----------|----------|----------|
| C | 0.43235  | 0.03381  | -0.14404 |
| C | -0.45414 | 1.28198  | -0.09035 |
| N | -0.02879 | -1.22591 | -0.58064 |
| O | 1.21206  | 0.71637  | -1.20154 |
| O | 0.52255  | 2.00266  | -0.87897 |
| H | 1.05721  | -0.09643 | 0.74554  |
| H | -1.40429 | 1.16840  | -0.62852 |
| H | -0.61869 | 1.75099  | 0.88365  |
| H | -0.12422 | -1.89979 | 0.17095  |
| H | -0.88745 | -1.18228 | -1.12216 |

val+03\_73

|   |          |          |          |
|---|----------|----------|----------|
| C | 0.84512  | 0.64043  | -0.40000 |
| C | 0.00658  | -0.23911 | 0.49910  |
| N | -0.89149 | -1.14689 | -0.21679 |
| O | 0.24737  | 1.80921  | -0.89515 |
| O | 1.35370  | 1.83341  | 0.12715  |
| H | 1.50286  | 0.13265  | -1.11087 |
| H | -0.57895 | 0.41461  | 1.15387  |
| H | 0.67887  | -0.83182 | 1.13088  |
| H | -0.35428 | -1.77897 | -0.80924 |
| H | -1.49418 | -0.61312 | -0.84216 |

val+03\_74

|   |          |          |          |
|---|----------|----------|----------|
| C | 0.89828  | 0.26487  | -0.08490 |
| C | 0.62108  | 1.70630  | -0.09285 |
| N | -0.67572 | -1.36327 | -0.49149 |
| O | 1.56365  | 1.08739  | 0.83310  |
| O | 0.01137  | -0.61333 | 0.54341  |
| H | 1.50008  | -0.20895 | -0.86107 |
| H | -0.29623 | 2.06194  | 0.37198  |
| H | 1.07315  | 2.35831  | -0.83854 |
| H | -0.65821 | -2.31459 | -0.12073 |
| H | -1.64715 | -1.05767 | -0.39962 |

val+03\_75

|   |          |          |          |
|---|----------|----------|----------|
| C | 0.44856  | -0.43207 | 0.10629  |
| C | 0.41997  | 1.54201  | -0.14743 |
| N | -0.52636 | -1.42598 | -0.03196 |
| O | 0.69875  | 0.45511  | -1.02568 |
| O | 0.01802  | 0.67434  | 0.91635  |
| H | 1.38434  | -0.88129 | 0.46303  |
| H | -0.38711 | 2.19824  | -0.49871 |
| H | 1.31563  | 2.12799  | 0.10300  |
| H | -0.15926 | -2.28405 | -0.43291 |
| H | -1.32815 | -1.10280 | -0.56838 |

val+03\_76

|   |          |          |          |
|---|----------|----------|----------|
| C | 0.14768  | -0.63565 | -0.18483 |
| C | -1.11325 | 0.24798  | 0.12566  |
| N | 1.21418  | 0.22342  | 0.28676  |
| O | -0.70473 | 1.58046  | 0.00409  |
| O | 0.93402  | 1.43673  | -0.18371 |
| H | 0.25344  | -0.77971 | -1.26168 |
| H | 0.14759  | -1.59576 | 0.33360  |
| H | -1.47214 | 0.03106  | 1.14150  |
| H | -1.90237 | 0.02549  | -0.60356 |
| H | 1.25909  | 0.24309  | 1.31206  |

val+03\_77

|   |          |          |          |
|---|----------|----------|----------|
| C | -0.88645 | -0.00513 | -0.07224 |
| C | 0.34264  | -0.86332 | 0.31224  |
| N | 0.93514  | 1.33961  | 0.25506  |
| O | -0.48765 | 1.33770  | 0.27172  |
| O | 1.27119  | 0.09584  | 0.85564  |

Supplementary Material (ESI) for PCCP  
This journal is © the Owner Societies 2011

|   |          |          |          |
|---|----------|----------|----------|
| H | -1.11102 | -0.07758 | -1.14277 |
| H | -1.78158 | -0.23452 | 0.50902  |
| H | 0.77532  | -1.36358 | -0.56220 |
| H | 0.14044  | -1.59667 | 1.09496  |
| H | 1.17948  | 1.21744  | -0.74124 |

val+03\_78

|   |          |          |          |
|---|----------|----------|----------|
| C | -0.30899 | 1.17187  | -0.35388 |
| C | 0.42234  | -0.93565 | -0.15754 |
| N | -0.63643 | -0.17396 | -0.81034 |
| O | 1.10275  | 1.24821  | -0.52819 |
| O | 1.59022  | -0.14976 | -0.38490 |
| H | -0.75258 | 1.94076  | -0.99411 |
| H | -0.56980 | 1.35773  | 0.70242  |
| H | 0.58755  | -1.90368 | -0.64091 |
| H | 0.26671  | -1.07250 | 0.92653  |
| H | -1.55166 | -0.45973 | -0.46389 |

val+03\_79

|   |          |          |          |
|---|----------|----------|----------|
| C | 0.14996  | -1.05092 | -0.11230 |
| C | 0.91502  | 1.09459  | -0.07824 |
| N | -0.95017 | -0.07941 | 0.02972  |
| O | 1.26083  | -0.23752 | -0.46298 |
| O | -0.22463 | 0.98439  | 0.73731  |
| H | 0.36346  | -1.60064 | 0.81657  |
| H | -0.07563 | -1.74765 | -0.92465 |
| H | 0.71142  | 1.68559  | -0.98273 |
| H | 1.71067  | 1.54732  | 0.52012  |
| H | -1.60214 | -0.40096 | 0.74837  |

val+03\_7

|   |          |          |          |
|---|----------|----------|----------|
| C | 0.64981  | 0.53372  | -0.08961 |
| C | -0.82347 | 0.51700  | -0.41534 |
| N | 1.37724  | -0.46505 | 0.23657  |
| O | -1.36039 | 1.82835  | -0.52420 |
| O | 0.62061  | -1.65742 | 0.24932  |
| H | 1.17082  | 1.48902  | -0.13767 |
| H | -1.35986 | -0.09178 | 0.32610  |
| H | -0.97771 | 0.03537  | -1.38862 |
| H | -1.38349 | 2.21059  | 0.36752  |
| H | 1.26916  | -2.31819 | 0.54183  |

val+03\_80

|   |          |          |          |
|---|----------|----------|----------|
| C | -0.13164 | -0.12969 | 0.37604  |
| C | 0.14763  | -1.42153 | -0.38746 |
| N | -0.38467 | 0.95889  | -0.59122 |
| O | -0.05049 | 2.21601  | 0.01515  |
| O | 0.86755  | 1.57837  | -0.93138 |
| H | -1.05710 | -0.20840 | 0.95767  |
| H | 0.69109  | 0.15279  | 1.03962  |
| H | -0.67326 | -1.66375 | -1.06953 |
| H | 1.07364  | -1.34315 | -0.96581 |
| H | 0.25744  | -2.24514 | 0.32404  |

val+03\_81

|   |          |          |          |
|---|----------|----------|----------|
| C | -0.65218 | 1.06722  | 0.12308  |
| C | 0.29492  | -1.18639 | 0.17994  |
| N | 0.01492  | 0.03905  | 0.93590  |
| O | 0.60686  | 1.65589  | -0.27592 |
| O | 1.22110  | 0.89322  | 0.85152  |
| H | -1.23726 | 0.70207  | -0.72637 |
| H | -1.23244 | 1.75642  | 0.74528  |
| H | -0.63798 | -1.75826 | 0.14078  |
| H | 0.65119  | -0.98933 | -0.83990 |
| H | 1.03825  | -1.76950 | 0.72829  |

val+03\_82

|   |          |          |          |
|---|----------|----------|----------|
| C | 1.05292  | -1.40304 | 0.24761  |
| C | -1.06193 | 1.39918  | -0.10537 |
| N | 0.29493  | -0.42809 | -0.48738 |
| O | 1.68790  | -0.16228 | 0.08183  |
| O | -0.64362 | 0.12042  | 0.39075  |
| H | 1.43989  | -2.24034 | -0.33399 |
| H | 0.70381  | -1.63987 | 1.25274  |
| H | -0.24654 | 2.12656  | -0.03081 |
| H | -1.40027 | 1.31947  | -1.14309 |
| H | -1.88979 | 1.70099  | 0.53841  |

val+03\_83  
C -0.12559 1.39167 0.04470  
C -0.02962 -1.66998 0.14055  
N 0.50305 -0.45456 -0.46561  
O -0.64833 0.39953 -0.83845  
O 0.81414 0.49123 0.63106  
H -0.86549 1.77647 0.75700  
H 0.36581 2.21320 -0.49562  
H -0.79663 -1.45568 0.89156  
H 0.81579 -2.20011 0.58961  
H -0.44044 -2.27828 -0.67099

val+03\_84  
C 0.04215 0.18108 0.20571  
C -1.25323 -0.55222 -0.03248  
N 1.19108 -0.61782 0.24775  
O -0.04195 1.32407 1.05247  
O 0.20702 1.41473 -0.43762  
H -2.06830 0.16849 -0.11353  
H -1.19058 -1.13831 -0.95394  
H -1.46172 -1.23508 0.79767  
H 1.98992 -0.10995 0.61785  
H 1.05372 -1.47919 0.76761

val+03\_8  
C 0.46051 -0.30295 -0.04638  
C -1.83478 -0.44156 -0.25666  
N -0.50401 -0.56133 -0.82682  
O 1.73156 -0.39638 -0.49160  
O -2.64403 0.43921 -1.01598  
H 0.35405 -0.00169 1.00394  
H -1.80716 -0.13100 0.80375  
H -2.33334 -1.41469 -0.31455  
H 2.33944 -0.15132 0.22482  
H -2.22954 1.31652 -0.96991

val+03\_9  
C -0.63720 -0.81891 0.08333  
C 1.57544 -0.21203 -0.36330  
N 0.64257 -1.04802 -0.57058  
O -0.83804 0.45091 0.65809  
O -1.60231 -1.08692 -0.90310  
H -0.70721 -1.51955 0.92550  
H 1.46863 0.67609 0.26800  
H 2.54547 -0.38017 -0.83337  
H -0.92083 1.08462 -0.07764  
H -2.47001 -1.00832 -0.47243

val+05\_100  
C 1.07780 -0.14184 0.31735  
C -0.95777 1.15037 -0.10286  
N -0.21903 -0.10535 -0.09388  
O 1.67655 0.80585 0.80223  
O 1.71337 -1.34117 0.19159  
H -0.76370 1.68749 0.82728  
H -0.67236 1.79339 -0.94488  
H -2.02450 0.92825 -0.17092  
H -0.58549 -0.85853 -0.65993  
H 1.11782 -2.03707 -0.13397

val+05\_103  
C 0.22123 0.31558 -0.21496  
C -1.25716 0.25951 -0.10708  
N 1.01629 -0.72082 -0.21826  
O 2.32755 -0.54537 -0.31854  
O 0.84605 1.48629 -0.31761  
H -1.59303 0.80154 0.78400  
H -1.71858 0.73434 -0.97998  
H -1.60444 -0.77469 -0.04307  
H 0.64749 -1.66867 -0.14438  
H 1.80500 1.18478 -0.36942

val+05\_105  
C 0.63606 -0.48705 -0.24863  
C -0.98001 1.21057 0.26910  
N 0.02101 0.59796 -0.61972

Supplementary Material (ESI) for PCCP  
This journal is © the Owner Societies 2011

|   |          |          |          |
|---|----------|----------|----------|
| O | 0.22796  | 1.20183  | -1.75151 |
| O | 1.54532  | -1.02761 | -1.08002 |
| H | 0.41863  | -0.94362 | 0.70722  |
| H | -0.65343 | 2.23084  | 0.48102  |
| H | -1.92866 | 1.24031  | -0.27108 |
| H | -1.08871 | 0.64626  | 1.19695  |
| H | 1.91081  | -1.82350 | -0.66173 |

|            |          |          |          |
|------------|----------|----------|----------|
| val+05_106 |          |          |          |
| C          | 2.57529  | -0.36246 | 1.23182  |
| C          | -0.77175 | -0.26607 | -0.15362 |
| N          | -1.67705 | -1.32711 | 0.23256  |
| O          | 2.61167  | -1.05252 | 0.32616  |
| O          | -0.29295 | 0.33932  | 1.04866  |
| H          | 0.05634  | -0.71894 | -0.71763 |
| H          | -1.23028 | 0.51136  | -0.78816 |
| H          | -2.59701 | -0.94453 | 0.44434  |
| H          | -1.79945 | -1.97263 | -0.54448 |
| H          | 0.04811  | 1.21748  | 0.81545  |

|            |          |          |          |
|------------|----------|----------|----------|
| val+05_107 |          |          |          |
| C          | 2.02348  | -1.52882 | -1.48878 |
| C          | -0.47307 | 0.71503  | 0.44524  |
| N          | -0.42316 | -0.73787 | 0.57463  |
| O          | 2.06704  | -0.46784 | -1.89972 |
| O          | -1.04838 | -1.34533 | -0.56475 |
| H          | -0.06424 | 1.15134  | 1.36294  |
| H          | -1.49347 | 1.10801  | 0.29551  |
| H          | 0.14891  | 1.02046  | -0.40056 |
| H          | -0.98661 | -1.01758 | 1.38020  |
| H          | -1.94599 | -0.96030 | -0.63491 |

|            |          |          |          |
|------------|----------|----------|----------|
| val+05_108 |          |          |          |
| C          | 0.88993  | -1.28099 | -0.31740 |
| C          | -1.16107 | -0.12449 | 0.35663  |
| N          | 0.09870  | -0.26548 | -0.46804 |
| O          | 0.24114  | 0.68648  | -1.31917 |
| O          | -1.32210 | 1.21492  | 0.67537  |
| H          | 0.66541  | -2.01122 | 0.44747  |
| H          | 1.74716  | -1.36759 | -0.97207 |
| H          | -1.96432 | -0.51843 | -0.28044 |
| H          | -1.06715 | -0.71719 | 1.26677  |
| H          | -1.05470 | 1.67899  | -0.14791 |

|            |          |          |          |
|------------|----------|----------|----------|
| val+05_109 |          |          |          |
| C          | 0.39687  | -0.09923 | -0.28922 |
| C          | -0.91848 | 0.03496  | 0.41321  |
| N          | 0.90895  | -1.27602 | -0.50526 |
| O          | 0.41096  | -2.40451 | -0.14886 |
| O          | -1.49606 | 1.31924  | 0.22173  |
| H          | 0.95617  | 0.76211  | -0.63465 |
| H          | -1.58200 | -0.78042 | 0.08865  |
| H          | -0.78584 | -0.08379 | 1.49670  |
| H          | 1.80371  | -1.30981 | -1.01255 |
| H          | -1.74858 | 1.38887  | -0.71295 |

|           |          |          |          |
|-----------|----------|----------|----------|
| val+05_10 |          |          |          |
| C         | -1.19966 | 0.36225  | 0.05468  |
| C         | -2.51180 | 0.96125  | 0.11132  |
| N         | -0.31171 | -0.50223 | -0.16771 |
| O         | -1.20838 | 1.60235  | 0.55065  |
| O         | 2.57354  | -0.30469 | 0.25227  |
| H         | -3.18550 | 0.73300  | 0.93279  |
| H         | -2.94692 | 1.41730  | -0.77381 |
| H         | 1.59838  | -0.35234 | 0.14156  |
| H         | -0.72066 | -1.34903 | -0.56457 |
| H         | 2.87951  | -0.02605 | -0.62390 |

|            |          |          |          |
|------------|----------|----------|----------|
| val+05_110 |          |          |          |
| C          | 1.42503  | -1.28701 | -0.08301 |
| C          | 0.51663  | -0.36915 | 0.19751  |
| N          | -0.78844 | -0.35307 | -0.42168 |
| O          | 2.22219  | -2.10891 | -0.34436 |
| O          | -1.52954 | 1.99806  | 1.01664  |
| H          | 0.76014  | 0.40122  | 0.92265  |
| H          | -0.73578 | -0.25967 | -1.43405 |
| H          | -1.43806 | 1.19314  | 0.45139  |

Supplementary Material (ESI) for PCCP  
This journal is © the Owner Societies 2011

|            |          |          |          |
|------------|----------|----------|----------|
| H          | -1.32536 | -1.19316 | -0.21525 |
| H          | -1.16269 | 2.70075  | 0.45865  |
| val+05_112 |          |          |          |
| C          | 0.42916  | -0.04233 | 0.18956  |
| C          | -0.17273 | 1.22728  | -0.19027 |
| N          | -0.36180 | -1.29185 | 0.05042  |
| O          | -0.97976 | -1.60000 | 1.23091  |
| O          | 0.84271  | 0.57588  | -1.00775 |
| H          | 1.14837  | -0.14975 | 0.99653  |
| H          | -1.17095 | 1.24429  | -0.62480 |
| H          | 0.14991  | 2.14129  | 0.30271  |
| H          | 0.28386  | -2.03710 | -0.26802 |
| H          | -1.02046 | -1.16180 | -0.73939 |
| val+05_113 |          |          |          |
| C          | 0.50829  | 0.00839  | 0.07952  |
| C          | -0.38704 | -1.21643 | 0.11472  |
| N          | -0.35165 | 1.30215  | 0.04311  |
| O          | -1.50675 | 1.36714  | -0.32858 |
| O          | 1.06144  | 0.37547  | -1.07289 |
| H          | 1.13506  | 0.08367  | 0.98720  |
| H          | -0.94513 | -1.27442 | 1.05500  |
| H          | 0.25096  | -2.10228 | 0.03627  |
| H          | -1.07987 | -1.20679 | -0.73023 |
| H          | 0.24678  | 2.13981  | -0.09913 |
| val+05_114 |          |          |          |
| C          | 0.01605  | -0.69635 | -0.07845 |
| C          | 1.04786  | 0.41802  | 0.04069  |
| N          | -1.11890 | 0.31274  | -0.04694 |
| O          | -2.05183 | 0.25763  | -0.87603 |
| O          | 0.10287  | 1.45254  | -0.27381 |
| H          | -0.03549 | -1.15456 | -1.06549 |
| H          | -0.08009 | -1.44501 | 0.71073  |
| H          | 1.86950  | 0.37101  | -0.68244 |
| H          | 1.46536  | 0.52226  | 1.05129  |
| H          | -1.38782 | 0.60070  | 0.90695  |
| val+05_115 |          |          |          |
| C          | -0.99609 | 0.38643  | 0.17849  |
| C          | 1.00051  | 0.43912  | -0.24508 |
| N          | 0.02792  | -0.73493 | -0.05568 |
| O          | 0.25416  | -1.63385 | 0.89677  |
| O          | -0.08308 | 1.36651  | -0.31660 |
| H          | -1.92043 | 0.31887  | -0.39897 |
| H          | -1.16691 | 0.43464  | 1.25758  |
| H          | 1.61355  | 0.41291  | -1.14834 |
| H          | 1.59154  | 0.50735  | 0.67258  |
| H          | -0.15656 | -1.16354 | -0.97975 |
| val+05_116 |          |          |          |
| C          | -0.12674 | 1.32614  | 0.02099  |
| C          | -0.41523 | -1.27894 | 0.09516  |
| N          | 0.26303  | -0.10646 | -0.51065 |
| O          | 1.31787  | -0.28933 | -1.08016 |
| O          | 0.29807  | 1.12355  | 1.24396  |
| H          | -1.21466 | 1.43087  | -0.16253 |
| H          | 0.44045  | 1.99951  | -0.64836 |
| H          | -1.22826 | -0.93488 | 0.72829  |
| H          | 0.31230  | -1.86499 | 0.65767  |
| H          | -0.78792 | -1.86865 | -0.74738 |
| val+05_117 |          |          |          |
| C          | -0.44345 | -0.06158 | 0.29750  |
| C          | 0.68536  | 0.84401  | -0.20829 |
| N          | -0.11526 | -1.36694 | 0.39460  |
| O          | -1.54073 | 0.41102  | 0.59630  |
| O          | 1.84345  | 0.15116  | -0.65824 |
| H          | 0.26769  | 1.50405  | -0.97783 |
| H          | 0.99665  | 1.47635  | 0.63023  |
| H          | -0.77762 | -2.03289 | 0.76721  |
| H          | 0.82757  | -1.66219 | 0.18155  |
| H          | 1.68306  | -0.13489 | -1.57164 |
| val+05_118 |          |          |          |
| C          | 0.55882  | 0.86631  | 0.32186  |

Supplementary Material (ESI) for PCCP  
 This journal is © the Owner Societies 2011

|   |          |          |          |
|---|----------|----------|----------|
| C | -0.57479 | -0.14691 | -0.04598 |
| N | 0.07491  | -1.50171 | -0.10564 |
| O | 0.22070  | 2.05751  | 0.40970  |
| O | 1.69509  | 0.32733  | 0.48681  |
| H | -1.35759 | -0.15366 | 0.71257  |
| H | -1.01722 | 0.08841  | -1.01393 |
| H | -0.29715 | -2.17009 | 0.57181  |
| H | 1.07565  | -1.23364 | 0.14460  |
| H | 0.04318  | -1.93585 | -1.03021 |

val+05\_119

|   |          |          |          |
|---|----------|----------|----------|
| C | 2.04825  | 0.33585  | -1.06707 |
| C | -1.48848 | 1.04560  | -0.25465 |
| N | -0.61225 | -1.34460 | 0.51887  |
| O | 2.61489  | 1.18256  | -1.57243 |
| O | -0.56267 | 1.82736  | -0.14715 |
| H | -1.67822 | 0.47381  | -1.17996 |
| H | -2.24246 | 0.90900  | 0.54107  |
| H | -0.86387 | -2.25754 | 0.14006  |
| H | -0.48786 | -1.48175 | 1.52157  |
| H | 0.31167  | -1.12638 | 0.14669  |

val+05\_11

|   |          |          |          |
|---|----------|----------|----------|
| C | -0.49626 | 1.12440  | -0.06873 |
| C | -0.37854 | 2.54979  | 0.09370  |
| N | -1.11125 | 0.08998  | -0.42034 |
| O | 0.67614  | 1.53144  | 0.48000  |
| O | 0.50818  | -2.43248 | 0.04699  |
| H | -0.83431 | 3.05121  | 0.94428  |
| H | -0.09006 | 3.18209  | -0.74274 |
| H | 0.04809  | -3.06332 | -0.53003 |
| H | -0.55057 | -0.75833 | -0.23829 |
| H | 1.33008  | -2.24507 | -0.43454 |

val+05\_120

|   |          |          |          |
|---|----------|----------|----------|
| C | -0.19672 | 2.35831  | 0.63269  |
| C | -0.03121 | -1.23991 | 0.23537  |
| N | 0.37195  | -0.08067 | -0.57116 |
| O | -0.69467 | 1.85205  | 1.56326  |
| O | 0.27688  | 2.96899  | -0.24638 |
| H | -1.10754 | -1.18599 | 0.42911  |
| H | 0.48029  | -1.20017 | 1.20270  |
| H | 0.18299  | -2.21880 | -0.22217 |
| H | -0.08660 | -0.12612 | -1.48035 |
| H | 1.36983  | -0.13849 | -0.77067 |

val+05\_122

|   |          |          |          |
|---|----------|----------|----------|
| C | 0.31225  | -1.42898 | -0.30348 |
| C | -0.64266 | 2.23767  | -0.51206 |
| N | 0.75222  | -0.70401 | 0.74116  |
| O | -0.33977 | -0.99135 | -1.25227 |
| O | -0.02690 | 2.17818  | 0.53665  |
| H | 0.59629  | -2.49463 | -0.23710 |
| H | -1.06677 | 3.19275  | -0.87103 |
| H | -0.79782 | 1.34263  | -1.13773 |
| H | 1.28305  | -1.14204 | 1.48079  |
| H | 0.55421  | 0.29667  | 0.79697  |

val+05\_123

|   |          |          |          |
|---|----------|----------|----------|
| C | -0.09472 | 1.02160  | 0.33832  |
| C | -0.44060 | -0.25017 | -0.47771 |
| N | -1.41026 | -0.16147 | -1.30691 |
| O | -0.83550 | 1.99309  | 0.06753  |
| O | 0.85852  | 0.88239  | 1.12877  |
| H | 0.09549  | -1.18987 | -0.37644 |
| H | 2.32420  | -1.94144 | 1.82504  |
| H | -1.86515 | 0.75976  | -1.34288 |
| H | 1.97802  | -1.30451 | 1.65316  |
| H | -1.73393 | -0.92177 | -1.90080 |

val+05\_125

|   |          |          |          |
|---|----------|----------|----------|
| C | -1.59129 | 1.63193  | 0.20884  |
| C | 1.14359  | -2.02958 | 0.26650  |
| N | 0.07197  | -1.35751 | 0.13389  |
| O | -2.47146 | 0.86811  | -0.14229 |
| O | -0.33477 | 1.30995  | 0.47555  |
| H | -1.75104 | 2.71328  | 0.34774  |



Supplementary Material (ESI) for PCCP  
This journal is © the Owner Societies 2011

|   |          |          |          |
|---|----------|----------|----------|
| H | 2.05959  | -1.51461 | 0.55891  |
| H | 1.20958  | -3.10846 | 0.10408  |
| H | -0.19875 | 0.30684  | 0.34319  |
| H | -0.72533 | -1.93666 | -0.14220 |

val+05\_127

|   |          |          |          |
|---|----------|----------|----------|
| C | 0.58103  | 0.28665  | -0.14144 |
| C | -1.73565 | -0.09781 | -0.13996 |
| N | 1.78193  | -0.20135 | -0.24433 |
| O | 2.88340  | 0.35357  | 0.15793  |
| O | -0.44137 | -0.38155 | -0.70116 |
| H | 0.43333  | 1.23970  | 0.35603  |
| H | -1.94145 | 0.97741  | -0.17253 |
| H | -2.45391 | -0.62938 | -0.76362 |
| H | -1.79565 | -0.45891 | 0.89156  |
| H | 1.84725  | -1.11635 | -0.71347 |

val+05\_128

|   |          |          |          |
|---|----------|----------|----------|
| C | 1.54964  | -1.62327 | -0.90501 |
| C | -1.46307 | 1.22007  | 0.14512  |
| N | 0.36085  | -1.75625 | -0.72911 |
| O | 2.70713  | -1.61523 | -1.15135 |
| O | -1.44576 | -0.13093 | 0.62816  |
| H | -0.48195 | 1.70009  | 0.24208  |
| H | -1.73334 | 1.17075  | -0.91149 |
| H | -2.21282 | 1.81543  | 0.67817  |
| H | -0.29502 | -1.14394 | -0.20854 |
| H | -1.19774 | -0.11152 | 1.56666  |

val+05\_129

|   |          |          |          |
|---|----------|----------|----------|
| C | 1.96040  | -0.42391 | 0.12387  |
| C | -1.57422 | -0.30573 | 0.17447  |
| N | 0.75679  | -0.15994 | -0.29075 |
| O | 0.38189  | 0.39868  | -1.33667 |
| O | -0.25050 | -0.60096 | 0.63575  |
| H | 2.08215  | -0.92168 | 1.07270  |
| H | 2.77778  | -0.12533 | -0.51430 |
| H | -1.73204 | 0.76968  | 0.06223  |
| H | -2.20554 | -0.69674 | 0.97413  |
| H | -1.79762 | -0.81668 | -0.76523 |

val+05\_12

|   |          |          |          |
|---|----------|----------|----------|
| C | 0.33854  | 0.79744  | 0.17500  |
| C | 0.72532  | -0.68575 | 0.14576  |
| N | -0.49310 | 1.18100  | -0.81617 |
| O | 0.78890  | 1.54595  | 1.04308  |
| O | 0.02118  | -1.46297 | -0.81524 |
| H | 0.61828  | -1.08109 | 1.16292  |
| H | 1.78767  | -0.74036 | -0.11552 |
| H | -0.77034 | 0.51323  | -1.52235 |
| H | -0.76219 | 2.15055  | -0.90910 |
| H | -0.83538 | -1.70780 | -0.43028 |

val+05\_130

|   |          |          |          |
|---|----------|----------|----------|
| C | 1.61501  | 0.29771  | -0.77405 |
| C | 0.89072  | -0.28298 | 0.16982  |
| N | -2.51682 | -0.13272 | 0.01110  |
| O | 2.27902  | 0.79738  | -1.61237 |
| O | -0.03214 | -1.26453 | -0.14427 |
| H | 1.07569  | 0.00335  | 1.20430  |
| H | -2.62209 | 0.67513  | -0.60169 |
| H | -0.95235 | -0.84857 | -0.08879 |
| H | -3.25331 | -0.78721 | -0.25111 |
| H | -2.74413 | 0.19033  | 0.95097  |

val+05\_131

|   |          |          |          |
|---|----------|----------|----------|
| C | 1.28181  | -0.17666 | 0.40285  |
| C | -0.33985 | 2.77003  | 0.52671  |
| N | -1.13848 | -1.19414 | 0.15292  |
| O | 1.47932  | 0.62584  | -0.49058 |
| O | -1.19699 | 2.62003  | -0.20786 |
| H | 1.58763  | -1.23470 | 0.32416  |
| H | 0.85715  | 0.11739  | 1.37812  |
| H | -1.69237 | -0.36357 | -0.05334 |
| H | -1.22969 | -1.79862 | -0.66306 |
| H | -1.62323 | -1.67269 | 0.91197  |

val+05\_132  
C 0.69647 -0.22845 0.06343  
C 1.99029 -1.03409 0.05144  
N -2.34328 0.98611 -0.55165  
O 0.52211 0.65962 0.87272  
O 2.17051 -1.92209 -0.75296  
H 2.73058 -0.74455 0.82126  
H -1.61107 1.20873 0.12411  
H -2.54212 1.86266 -1.03442  
H -3.17626 0.79328 0.00506  
H -0.05513 -0.50311 -0.69749

val+05\_133  
C 1.07977 -0.63901 0.46149  
C -0.66101 1.03096 -0.26341  
N -0.30624 -0.38246 0.00996  
O 1.81204 0.23927 0.84039  
O -0.83054 -0.87268 1.20365  
H 1.28583 -1.71324 0.44575  
H -0.20658 1.34788 -1.20515  
H -1.74827 1.07780 -0.32052  
H -0.29274 1.62738 0.56841  
H -0.57206 -0.96970 -0.79338

val+05\_134  
C -0.11115 -0.76988 0.11880  
C 1.37223 -0.49432 0.03319  
N -0.94085 0.33199 0.07189  
O -0.59905 -1.88476 0.27841  
O -0.44523 1.50711 -0.52291  
H 1.91075 -1.41888 0.24580  
H 1.67368 0.28406 0.74068  
H 1.63379 -0.14017 -0.96949  
H -1.90223 0.14872 -0.20332  
H -0.41853 2.15194 0.20605

val+05\_135  
C -0.38073 -0.29592 0.01297  
C 1.08509 -0.67655 -0.02867  
N -0.61553 1.19600 -0.08989  
O -1.78739 1.56832 -0.08167  
O 0.35196 1.94745 -0.17294  
H -0.95746 -0.71884 -0.81307  
H -0.87143 -0.58365 0.94611  
H 1.15822 -1.76579 0.05049  
H 1.63726 -0.23231 0.80309  
H 1.55172 -0.36671 -0.96701

val+05\_136  
C 1.02377 -0.58980 -0.07846  
C -0.47162 -0.36177 -0.04303  
N -0.75643 1.10229 0.02246  
O 1.81296 0.26671 -0.41883  
O -0.51072 1.61307 1.26768  
H 1.35427 -1.61271 0.18272  
H -0.93069 -0.80838 0.84069  
H -0.91415 -0.80939 -0.94470  
H -1.73191 1.25249 -0.28396  
H -0.16159 1.54668 -0.69897

val+05\_137  
C 0.05187 -0.08335 0.00353  
C 1.28505 -0.43633 -0.30476  
N -1.02635 -1.09022 -0.21845  
O -0.67735 1.01652 0.50489  
O -2.11045 -0.62348 -1.03815  
H 2.00697 0.36001 -0.05721  
H -1.45047 -1.43460 0.65326  
H -0.57628 -1.86598 -0.71372  
H -0.10279 1.79438 0.42719  
H -2.16939 0.31315 -0.74687

val+05\_139  
C 0.34455 -1.31804 -0.15091  
C 1.53389 -1.41910 0.04101  
N -1.00434 -1.15538 -0.29774  
O -2.31215 0.79750 1.33936

Supplementary Material (ESI) for PCCP  
This journal is © the Owner Societies 2011

|   |          |          |          |
|---|----------|----------|----------|
| O | -2.85223 | 1.48510  | 0.17568  |
| H | 2.58486  | -1.52456 | 0.18712  |
| H | -1.25914 | -0.69459 | -1.17046 |
| H | -1.81307 | 0.07100  | 0.88604  |
| H | -1.52180 | -2.02976 | -0.21970 |
| H | -2.25656 | 2.25443  | 0.12639  |

|           |          |          |          |
|-----------|----------|----------|----------|
| val+05_13 |          |          |          |
| C         | 0.04128  | -0.16917 | 0.29404  |
| C         | 1.06074  | 0.97878  | 0.12344  |
| N         | 0.60558  | -1.31827 | 0.14013  |
| O         | 2.27318  | 0.47051  | -0.13725 |
| O         | -1.24182 | -0.05342 | 0.55974  |
| H         | 0.60157  | 1.63074  | -0.66662 |
| H         | 0.95114  | 1.57899  | 1.06546  |
| H         | 1.63181  | -1.09110 | -0.06097 |
| H         | 0.15045  | -2.22016 | 0.20195  |
| H         | -1.48244 | 0.88901  | 0.64209  |

|            |          |          |          |
|------------|----------|----------|----------|
| val+05_140 |          |          |          |
| C          | 0.83787  | -0.43748 | 0.30981  |
| C          | 1.51469  | 0.55241  | 0.12485  |
| N          | -2.21662 | -0.51403 | -0.26096 |
| O          | 0.11214  | -1.49740 | 0.50821  |
| O          | -1.95886 | 0.85019  | -0.63989 |
| H          | 2.13422  | 1.40520  | -0.02916 |
| H          | -0.86063 | -1.25466 | 0.23973  |
| H          | -2.64524 | -0.94298 | -1.08296 |
| H          | -2.94700 | -0.45978 | 0.45112  |
| H          | -1.00038 | 0.94553  | -0.48265 |

|            |          |          |          |
|------------|----------|----------|----------|
| val+05_141 |          |          |          |
| C          | -0.49500 | -0.45936 | 0.13955  |
| C          | -0.11163 | -1.67355 | 0.31408  |
| N          | -1.87498 | -0.01378 | -0.09432 |
| O          | 0.45992  | -2.71461 | 0.49650  |
| O          | -0.32762 | 2.31049  | 0.09158  |
| H          | 0.05360  | 1.39585  | 0.20274  |
| H          | -1.84203 | 1.02144  | -0.13165 |
| H          | -2.27753 | -0.34109 | -0.98091 |
| H          | -2.53620 | -0.27503 | 0.64706  |
| H          | -0.07642 | 2.54905  | -0.81572 |

|            |          |          |          |
|------------|----------|----------|----------|
| val+05_143 |          |          |          |
| C          | 1.15287  | 0.18473  | 0.19372  |
| C          | 1.89670  | 1.12339  | 0.36924  |
| N          | -2.74337 | 0.04422  | -0.06560 |
| O          | 0.39731  | -0.84272 | -0.06362 |
| O          | -0.56259 | -1.04041 | 1.05805  |
| H          | 2.55285  | 1.95093  | 0.51333  |
| H          | -3.07629 | -0.47703 | -0.87604 |
| H          | -2.57496 | 0.99803  | -0.38394 |
| H          | -3.52446 | 0.09212  | 0.58803  |
| H          | -1.40326 | -0.63255 | 0.62161  |

|            |          |          |          |
|------------|----------|----------|----------|
| val+05_144 |          |          |          |
| C          | -0.45348 | 0.75847  | -0.19332 |
| C          | -1.43186 | -0.37140 | -0.24381 |
| N          | 0.78199  | 0.44386  | -0.12016 |
| O          | -2.76532 | 0.08889  | -0.45601 |
| O          | 1.33805  | -0.91148 | -0.19801 |
| H          | -1.35902 | -0.93857 | 0.70167  |
| H          | -1.19662 | -1.07723 | -1.05074 |
| H          | 1.54977  | 1.10753  | -0.10197 |
| H          | -2.79203 | 0.98726  | -0.08718 |
| H          | 1.50501  | -1.14733 | 0.73413  |

|            |          |          |          |
|------------|----------|----------|----------|
| val+05_145 |          |          |          |
| C          | 1.48084  | -0.33376 | -0.41671 |
| C          | -0.84358 | 0.43198  | 0.39632  |
| N          | 0.61940  | 0.43379  | 0.27770  |
| O          | 0.91784  | -1.33869 | -1.10601 |
| O          | -1.45364 | 1.47859  | -0.32536 |
| H          | -1.23767 | -0.55041 | 0.11166  |
| H          | -1.09809 | 0.59820  | 1.44443  |
| H          | 1.06505  | 1.20343  | 0.76299  |
| H          | -0.06036 | -1.41227 | -1.04533 |

Supplementary Material (ESI) for PCCP  
This journal is © the Owner Societies 2011

|            |          |          |          |
|------------|----------|----------|----------|
| H          | -1.32739 | 1.30684  | -1.27287 |
| val+05_146 |          |          |          |
| C          | -0.79172 | 0.27757  | -0.06509 |
| C          | -1.65935 | -0.94366 | 0.04000  |
| N          | 0.44161  | 0.11707  | 0.17565  |
| O          | 1.40249  | 1.14984  | 0.11900  |
| O          | 1.15393  | -1.02291 | 0.62444  |
| H          | -2.30701 | -0.82758 | 0.91920  |
| H          | -2.33150 | -0.98469 | -0.82442 |
| H          | -1.12193 | -1.89576 | 0.12914  |
| H          | 0.88081  | 1.87253  | -0.28497 |
| H          | 1.87027  | -1.13042 | -0.03266 |
| val+05_147 |          |          |          |
| C          | 0.49855  | -0.92722 | 0.30784  |
| C          | -1.16991 | 0.87582  | 0.22405  |
| N          | 0.17207  | 0.33870  | 0.16916  |
| O          | 1.86003  | -1.01923 | 0.19200  |
| O          | 1.11233  | 1.39309  | -0.06055 |
| H          | -1.24770 | 1.60307  | 1.03819  |
| H          | -1.41358 | 1.36846  | -0.72237 |
| H          | -1.85068 | 0.04348  | 0.39908  |
| H          | 2.09886  | -1.95182 | 0.29401  |
| H          | 1.96334  | 0.91005  | -0.07561 |
| val+05_148 |          |          |          |
| C          | 1.75481  | -1.22815 | 0.19112  |
| C          | -0.33810 | -0.00271 | 0.02282  |
| N          | 0.97441  | -0.41654 | -0.48082 |
| O          | -0.33677 | 1.30572  | 0.51371  |
| O          | -1.21393 | -0.15892 | -1.05777 |
| H          | 2.67354  | -1.33515 | -0.42216 |
| H          | -0.56237 | -0.64929 | 0.87455  |
| H          | 1.19477  | 0.00419  | -1.39139 |
| H          | -0.23437 | 1.90861  | -0.24471 |
| H          | -2.09140 | 0.13966  | -0.76495 |
| val+05_149 |          |          |          |
| C          | 0.86472  | 1.26413  | -0.14523 |
| C          | -1.20116 | -0.01661 | -0.21085 |
| N          | 0.26510  | 0.14735  | -0.01052 |
| O          | -1.73373 | 1.17850  | -0.67995 |
| O          | 0.84443  | -1.06994 | 0.49325  |
| H          | 1.92907  | 1.15729  | 0.09687  |
| H          | -1.61700 | -0.31797 | 0.75939  |
| H          | -1.34767 | -0.83287 | -0.92961 |
| H          | -0.96902 | 1.80993  | -0.62420 |
| H          | 0.93766  | -1.64052 | -0.29435 |
| val+05_150 |          |          |          |
| C          | 0.66098  | -0.97273 | 0.79890  |
| C          | -0.60285 | -0.71850 | -0.01504 |
| N          | 1.54582  | -0.05039 | 0.52875  |
| O          | -0.74444 | 0.57122  | -0.62014 |
| O          | -1.70362 | -0.99645 | 0.81939  |
| H          | -0.55695 | -1.40717 | -0.87381 |
| H          | 1.36592  | 0.73277  | -0.11202 |
| H          | 2.46774  | -0.06850 | 0.95310  |
| H          | -0.95746 | 1.19110  | 0.10039  |
| H          | -2.50055 | -0.91965 | 0.26808  |
| val+05_152 |          |          |          |
| C          | 1.38240  | 0.81645  | -0.60654 |
| C          | -0.99974 | 1.16650  | -0.12857 |
| N          | 0.38105  | 1.62219  | -0.44337 |
| O          | 1.66772  | -0.33968 | -0.61035 |
| O          | 0.15189  | -1.65156 | -0.28608 |
| H          | -1.29935 | 1.60120  | 0.82810  |
| H          | -1.67036 | 1.50829  | -0.92064 |
| H          | -0.96496 | 0.07241  | -0.08009 |
| H          | 0.56229  | 2.61625  | -0.52057 |
| H          | 0.42105  | -1.73933 | 0.64562  |
| val+05_153 |          |          |          |
| C          | 0.60577  | 1.37968  | -0.97028 |
| C          | -1.23294 | -0.06307 | -0.11152 |

Supplementary Material (ESI) for PCCP  
 This journal is © the Owner Societies 2011

|   |          |          |          |
|---|----------|----------|----------|
| N | 1.54719  | 0.59888  | -0.47421 |
| O | -0.67839 | 1.09586  | -0.80711 |
| O | 1.46826  | -0.69918 | 0.17225  |
| H | -0.94246 | -0.05597 | 0.94014  |
| H | -2.31400 | 0.05490  | -0.20083 |
| H | -0.90973 | -0.99008 | -0.58412 |
| H | 2.51114  | 0.81998  | -0.68851 |
| H | 1.58666  | -0.49651 | 1.11869  |

|            |          |          |          |
|------------|----------|----------|----------|
| val+05_154 |          |          |          |
| C          | 1.68347  | 0.35323  | -0.23462 |
| C          | -1.53880 | -0.62252 | -0.00227 |
| N          | 0.42843  | 0.67452  | 0.03877  |
| O          | -0.44104 | -0.16507 | 0.80757  |
| O          | 1.99939  | -0.88132 | 0.17301  |
| H          | -2.15636 | 0.22091  | -0.33092 |
| H          | -2.12375 | -1.27279 | 0.65180  |
| H          | -1.18225 | -1.18389 | -0.87165 |
| H          | 0.05808  | 1.60841  | -0.09351 |
| H          | 1.23504  | -1.29598 | 0.63881  |

|            |          |          |          |
|------------|----------|----------|----------|
| val+05_155 |          |          |          |
| C          | 0.11201  | -1.39002 | -0.43514 |
| C          | -1.19859 | -0.96283 | 0.15867  |
| N          | 1.07192  | -0.55004 | -0.14615 |
| O          | -1.25324 | 0.26872  | 0.92149  |
| O          | -1.28768 | 1.37374  | -0.02850 |
| H          | -1.96878 | -0.93407 | -0.62223 |
| H          | -1.50315 | -1.72726 | 0.88790  |
| H          | 0.93885  | 0.29876  | 0.41325  |
| H          | 2.02138  | -0.71222 | -0.46502 |
| H          | -2.23612 | 1.60142  | -0.00066 |

|            |          |          |          |
|------------|----------|----------|----------|
| val+05_156 |          |          |          |
| C          | 0.99705  | -0.34542 | -0.92382 |
| C          | -1.21529 | -0.55943 | 0.15553  |
| N          | 1.41059  | 0.07372  | 0.27310  |
| O          | -0.34276 | -0.55865 | -0.99752 |
| O          | -1.30050 | 0.67576  | 0.81040  |
| H          | -2.17937 | -0.88895 | -0.24117 |
| H          | -0.83778 | -1.27397 | 0.89211  |
| H          | 2.39932  | 0.25185  | 0.38587  |
| H          | 0.81265  | 0.36433  | 1.04613  |
| H          | -1.71672 | 1.31516  | 0.20828  |

|            |          |          |          |
|------------|----------|----------|----------|
| val+05_157 |          |          |          |
| C          | 0.95784  | 1.27270  | 1.15338  |
| C          | -1.19472 | 0.69107  | 0.03816  |
| N          | 0.18493  | 0.61402  | 0.46636  |
| O          | 0.69962  | -0.88218 | -0.31930 |
| O          | 2.04191  | -1.01330 | 0.04912  |
| H          | 1.97827  | 0.87432  | 1.24383  |
| H          | -1.22529 | 0.70559  | -1.05344 |
| H          | -1.64037 | 1.60025  | 0.44314  |
| H          | -1.72902 | -0.18955 | 0.40121  |
| H          | 1.99673  | -1.55793 | 0.85964  |

|            |          |          |          |
|------------|----------|----------|----------|
| val+05_158 |          |          |          |
| C          | 0.75093  | 1.24393  | 0.21120  |
| C          | -1.22161 | -1.29503 | 0.07130  |
| N          | 0.68187  | -0.00561 | 0.42638  |
| O          | -0.39633 | -0.61614 | 1.04170  |
| O          | 1.63151  | -1.07599 | 0.20953  |
| H          | 1.74055  | 1.46840  | -0.21377 |
| H          | -1.61250 | -0.57531 | -0.65520 |
| H          | -2.03571 | -1.72454 | 0.65619  |
| H          | -0.65742 | -2.08418 | -0.43170 |
| H          | 2.25851  | -0.69982 | -0.43701 |

|            |          |          |          |
|------------|----------|----------|----------|
| val+05_159 |          |          |          |
| C          | 1.00386  | -1.70937 | 0.16327  |
| C          | -1.13903 | -0.57735 | 0.01039  |
| N          | 0.23787  | -0.81078 | -0.41297 |
| O          | -1.29432 | 0.62361  | 0.73696  |
| O          | -1.16561 | 1.71220  | -0.22699 |
| H          | 1.98196  | -1.64791 | -0.35964 |
| H          | -1.80021 | -0.57608 | -0.86173 |

Supplementary Material (ESI) for PCCP  
This journal is © the Owner Societies 2011

|   |          |          |          |
|---|----------|----------|----------|
| H | -1.40423 | -1.36887 | 0.71356  |
| H | 0.52966  | -0.20030 | -1.18230 |
| H | -0.35237 | 2.13946  | 0.10166  |

val+05\_15

|   |          |          |          |
|---|----------|----------|----------|
| C | 0.55504  | 0.33902  | -0.16887 |
| C | -0.80155 | 0.96261  | 0.06455  |
| N | 0.57730  | -1.03079 | -0.33478 |
| O | 1.59993  | 0.97505  | -0.26975 |
| O | -0.49374 | -1.77757 | 0.19012  |
| H | -0.70145 | 2.04711  | 0.00215  |
| H | -1.17877 | 0.68673  | 1.05496  |
| H | -1.53287 | 0.61223  | -0.66992 |
| H | 1.47123  | -1.48244 | -0.16015 |
| H | -0.92261 | -2.16534 | -0.59330 |

val+05\_160

|   |          |          |          |
|---|----------|----------|----------|
| C | 1.79072  | 0.19261  | 0.01056  |
| C | -1.57526 | -0.36792 | -0.01576 |
| N | 0.74753  | -0.31138 | -0.52213 |
| O | -0.32916 | -1.03319 | 0.17683  |
| O | -1.71489 | 0.79848  | 0.74169  |
| H | 1.72124  | 0.05710  | 1.10279  |
| H | -2.31425 | -1.08475 | 0.34734  |
| H | -1.72990 | -0.17773 | -1.08737 |
| H | 0.56361  | -0.35502 | -1.52371 |
| H | -1.26225 | 1.52340  | 0.28105  |

val+05\_161

|   |          |          |          |
|---|----------|----------|----------|
| C | 1.46206  | -0.97438 | 0.19514  |
| C | -1.88150 | -0.30414 | 0.01244  |
| N | 1.79373  | 0.29028  | 0.22675  |
| O | 0.42080  | -1.46017 | -0.19119 |
| O | -0.78159 | -0.13793 | -0.82151 |
| H | -2.67620 | 0.37563  | -0.34631 |
| H | -2.29849 | -1.32639 | -0.01553 |
| H | -1.68674 | -0.04494 | 1.06804  |
| H | 1.08459  | 0.95175  | -0.09622 |
| H | 2.68204  | 0.60937  | 0.58479  |

val+05\_162

|   |          |          |          |
|---|----------|----------|----------|
| C | 2.64165  | -0.31737 | 0.22043  |
| C | -1.44436 | 0.21962  | -0.40430 |
| N | 1.67154  | 0.33422  | -0.22810 |
| O | -0.50231 | 1.29759  | -0.34335 |
| O | 0.50190  | 0.95148  | 0.60806  |
| H | 2.59037  | -0.46345 | 1.30774  |
| H | -1.90917 | 0.05678  | 0.57280  |
| H | -2.19446 | 0.55246  | -1.12707 |
| H | -0.96923 | -0.70197 | -0.75692 |
| H | 1.45155  | 0.62914  | -1.17999 |

val+05\_16

|   |          |          |          |
|---|----------|----------|----------|
| C | 0.23367  | 0.63390  | 0.17683  |
| C | -0.52833 | -1.73687 | -0.04092 |
| N | 0.39398  | -0.69309 | 0.38732  |
| O | 1.05706  | 1.49887  | 0.45499  |
| O | -0.97792 | 0.91803  | -0.37525 |
| H | -1.54477 | -1.50290 | 0.28438  |
| H | -0.52985 | -1.86695 | -1.12997 |
| H | -0.22108 | -2.67548 | 0.42391  |
| H | 1.31221  | -0.95860 | 0.71230  |
| H | -1.00768 | 1.88678  | -0.46379 |

val+05\_17

|   |          |          |          |
|---|----------|----------|----------|
| C | 0.29204  | 1.36975  | 0.25741  |
| C | -0.87630 | -0.97113 | -0.11880 |
| N | 0.28264  | -0.05424 | -0.10721 |
| O | 0.36388  | 0.79033  | -1.20871 |
| O | 1.47762  | -0.73174 | 0.19201  |
| H | -0.78890 | 1.58531  | 0.37085  |
| H | -1.75716 | -0.38411 | -0.37196 |
| H | -0.96668 | -1.40742 | 0.87643  |
| H | -0.70717 | -1.74916 | -0.86727 |
| H | 1.59953  | -1.36530 | -0.54444 |

val+05\_18

Supplementary Material (ESI) for PCCP  
This journal is © the Owner Societies 2011

|   |          |          |          |
|---|----------|----------|----------|
| C | 1.04610  | 0.90515  | 1.03385  |
| C | 0.53224  | -0.15883 | 0.17389  |
| N | -0.16368 | 1.16331  | 0.06627  |
| O | -0.17350 | -1.15820 | 0.84545  |
| O | -0.91336 | -1.95449 | -0.14072 |
| H | 1.91197  | 1.37029  | 0.54958  |
| H | 0.92299  | -0.50752 | -0.78345 |
| H | -1.07774 | 1.26038  | 0.49981  |
| H | -0.08734 | 1.64902  | -0.82701 |
| H | -1.81278 | -1.59412 | -0.02547 |

val+05\_19

|   |          |          |          |
|---|----------|----------|----------|
| C | -0.25896 | 0.58768  | 0.78115  |
| C | 0.21508  | -0.62254 | 0.00029  |
| N | 0.45961  | 1.41648  | -0.30455 |
| O | 0.98405  | 0.25590  | -0.96685 |
| O | -0.77917 | -1.36534 | -0.62186 |
| H | -1.32952 | 0.72513  | 0.59145  |
| H | 0.96171  | -1.29960 | 0.43913  |
| H | -0.09651 | 1.98470  | -0.95763 |
| H | 1.25385  | 1.98072  | 0.01040  |
| H | -0.41524 | -2.22922 | -0.88482 |

val+05\_1

|   |          |          |          |
|---|----------|----------|----------|
| C | -0.20727 | 2.29288  | 0.84575  |
| C | 0.60763  | 2.25273  | -0.13580 |
| N | 0.37219  | 0.92318  | 0.55311  |
| O | -1.06430 | -1.13927 | -0.54900 |
| O | -0.42775 | -2.28063 | 0.09597  |
| H | -0.92867 | 2.71443  | 1.52481  |
| H | 1.15780  | 2.61146  | -0.98895 |
| H | -0.53151 | -0.38399 | -0.14436 |
| H | 1.14583  | 0.73495  | 1.20285  |
| H | -1.08604 | -2.49264 | 0.78124  |

val+05\_20

|   |          |          |          |
|---|----------|----------|----------|
| C | 0.28815  | 0.95349  | -0.27013 |
| C | 1.01519  | -1.31656 | 0.09977  |
| N | -1.14830 | 0.52966  | 0.10352  |
| O | 1.13413  | -0.04823 | 0.43071  |
| O | 0.13677  | -1.80305 | -0.60625 |
| H | 0.44944  | 1.82372  | 0.38148  |
| H | 1.81120  | -1.91587 | 0.56574  |
| H | -1.36936 | 0.42945  | 1.10721  |
| H | -1.80592 | 1.20318  | -0.29463 |
| H | -1.30801 | -0.38529 | -0.33722 |

val+05\_21

|   |          |          |          |
|---|----------|----------|----------|
| C | 0.40752  | 0.12526  | -0.70927 |
| C | -0.16400 | 1.25891  | 0.02515  |
| N | 1.00612  | 0.47943  | 0.52982  |
| O | -0.90134 | -1.42121 | 0.69625  |
| O | -0.35569 | -1.15860 | -0.65882 |
| H | 0.96048  | 0.13517  | -1.64298 |
| H | -1.11647 | 1.08408  | 0.51729  |
| H | 0.04498  | 2.27434  | -0.29826 |
| H | 0.62663  | -0.20247 | 1.20506  |
| H | -1.15482 | -1.06401 | -1.21665 |

val+05\_22

|   |          |          |          |
|---|----------|----------|----------|
| C | -0.28480 | 0.20255  | 0.37087  |
| C | 0.73502  | 1.25374  | 0.03031  |
| N | -0.04412 | -1.00435 | 0.04048  |
| O | 1.92582  | 0.72440  | -0.52211 |
| O | -1.09573 | -1.86842 | 0.38051  |
| H | -1.21412 | 0.50116  | 0.86044  |
| H | 0.26122  | 1.97969  | -0.65342 |
| H | 0.99813  | 1.81208  | 0.93873  |
| H | 1.68688  | -0.12756 | -0.92745 |
| H | -0.76850 | -2.73499 | 0.08773  |

val+05\_23

|   |          |          |          |
|---|----------|----------|----------|
| C | 0.81252  | 0.88897  | -0.33283 |
| C | -0.94048 | 1.49016  | -0.10544 |
| N | -0.23009 | 0.20249  | -0.01275 |
| O | 0.33791  | 2.15507  | -0.46677 |
| O | -0.91792 | -2.58004 | 0.53963  |

Supplementary Material (ESI) for PCCP  
This journal is © the Owner Societies 2011

|   |          |          |          |
|---|----------|----------|----------|
| H | 1.85677  | 0.63141  | -0.48576 |
| H | -1.66121 | 1.56589  | -0.92071 |
| H | -1.32573 | 1.87737  | 0.83878  |
| H | -0.67965 | -1.64126 | 0.37897  |
| H | -1.11014 | -2.91237 | -0.35001 |

val+05\_24

|   |          |          |          |
|---|----------|----------|----------|
| C | 0.15811  | 1.76682  | 0.83386  |
| C | -0.44500 | -0.56803 | -0.30239 |
| N | 0.47950  | 0.36529  | 0.40478  |
| O | 0.95882  | 1.39874  | -0.43010 |
| O | -1.21944 | -1.27305 | 0.61418  |
| H | -0.87189 | 1.88989  | 0.43323  |
| H | -1.08948 | 0.07668  | -0.90074 |
| H | 0.16282  | -1.21194 | -0.94649 |
| H | 1.23809  | -0.09488 | 0.91264  |
| H | -0.74794 | -2.07982 | 0.87741  |

val+05\_27

|   |          |          |          |
|---|----------|----------|----------|
| C | -1.14709 | -1.00845 | 0.12719  |
| C | -0.02408 | 1.16207  | -0.03005 |
| N | -0.03656 | -0.34015 | 0.13983  |
| O | 1.07155  | 1.50098  | -0.80886 |
| O | 1.13777  | -0.82548 | 0.33027  |
| H | -1.10902 | -2.07393 | 0.31222  |
| H | -2.07323 | -0.48258 | -0.05821 |
| H | -0.94439 | 1.47978  | -0.52046 |
| H | 0.02861  | 1.56362  | 0.99077  |
| H | 1.77914  | 0.90484  | -0.47990 |

val+05\_28

|   |          |          |          |
|---|----------|----------|----------|
| C | 0.69484  | 0.84994  | -0.36827 |
| C | 0.73461  | -0.62969 | -0.17849 |
| N | -0.76112 | 1.26100  | 0.12281  |
| O | 1.26310  | 0.17063  | 0.84563  |
| O | -0.44699 | -1.33177 | 0.12384  |
| H | 1.45657  | -1.24370 | -0.72376 |
| H | -0.67987 | 2.01216  | 0.80964  |
| H | -1.28588 | 0.47632  | 0.53883  |
| H | -1.28745 | 1.62881  | -0.67246 |
| H | -0.22801 | -2.03699 | 0.75595  |

val+05\_29

|   |          |          |          |
|---|----------|----------|----------|
| C | 0.60447  | 0.85775  | -0.24372 |
| C | -0.82444 | 1.15262  | -0.45004 |
| N | -0.29811 | 0.69954  | 0.87874  |
| O | 1.26962  | -0.23136 | -0.84658 |
| O | 0.33216  | -1.32915 | -1.02879 |
| H | 1.35696  | 1.64093  | -0.16936 |
| H | -1.40293 | 0.44028  | -1.03042 |
| H | -1.17690 | 2.18082  | -0.48213 |
| H | -0.51733 | -0.29187 | 0.98957  |
| H | 0.73180  | -1.99286 | -0.43606 |

val+05\_2

|   |          |          |          |
|---|----------|----------|----------|
| C | -0.35218 | 0.37038  | 0.27473  |
| C | 0.72516  | 1.25601  | 0.42709  |
| N | 0.03013  | -0.91776 | -0.08469 |
| O | 1.92388  | 0.94512  | 0.21772  |
| O | 0.12303  | -1.91659 | 1.11819  |
| H | -1.39556 | 0.56799  | 0.46632  |
| H | 0.46073  | 2.29239  | 0.71321  |
| H | -0.58419 | -1.40635 | -0.73674 |
| H | 1.00559  | -0.85164 | -0.41817 |
| H | 0.43052  | -2.74916 | 0.70333  |

val+05\_30

|   |          |          |          |
|---|----------|----------|----------|
| C | 0.63089  | 1.00022  | -0.00862 |
| C | -0.75973 | 1.45057  | 0.23387  |
| N | -0.29506 | 0.14250  | 0.76368  |
| O | -0.69478 | -0.90972 | -0.15687 |
| O | -1.93955 | -1.42702 | 0.33855  |
| H | 1.46281  | 1.38866  | 0.57133  |
| H | 0.87677  | 0.65480  | -1.00894 |
| H | -1.45715 | 1.40480  | -0.59642 |
| H | -0.97904 | 2.18414  | 1.00439  |
| H | -1.63127 | -2.03364 | 1.04013  |



|           |          |          |          |
|-----------|----------|----------|----------|
| val+05_31 |          |          |          |
| C         | -0.21051 | -0.38350 | 0.05552  |
| C         | 1.09217  | -0.18035 | -0.10033 |
| N         | -0.97425 | -1.51751 | 0.18433  |
| O         | -2.36769 | 0.59094  | -0.56774 |
| O         | -1.03467 | 0.85706  | 0.04882  |
| H         | 1.50170  | 0.82155  | -0.13125 |
| H         | 1.76600  | -1.02706 | -0.15957 |
| H         | -1.95183 | -1.26025 | 0.00910  |
| H         | -0.83936 | -2.02038 | 1.05623  |
| H         | -1.27216 | 1.07350  | 0.97457  |

|           |          |          |          |
|-----------|----------|----------|----------|
| val+05_32 |          |          |          |
| C         | -1.29926 | 0.85007  | -0.48326 |
| C         | -0.00645 | 0.83211  | -0.10873 |
| N         | -1.99556 | -0.39717 | 0.11299  |
| O         | 0.54959  | -0.09642 | 0.78303  |
| O         | 1.76995  | -0.68509 | 0.17610  |
| H         | 0.69986  | 1.60171  | -0.41704 |
| H         | -2.69621 | -0.11084 | 0.80122  |
| H         | -2.50861 | -0.88594 | -0.62367 |
| H         | -1.36058 | -1.06584 | 0.57379  |
| H         | 1.37334  | -1.33011 | -0.44064 |

|           |          |          |          |
|-----------|----------|----------|----------|
| val+05_33 |          |          |          |
| C         | -0.87739 | 1.77547  | 0.00037  |
| C         | 0.57583  | 1.24158  | 0.07042  |
| N         | 0.08535  | -0.10947 | -0.38068 |
| O         | -1.13837 | 0.38153  | -0.79787 |
| O         | 0.00159  | -1.02336 | 0.71928  |
| H         | -1.32428 | 1.50798  | 0.97676  |
| H         | 1.24737  | 1.59488  | -0.72028 |
| H         | 1.11785  | 1.17648  | 1.01710  |
| H         | 0.57527  | -0.59642 | -1.14670 |
| H         | -0.68261 | -1.66356 | 0.43551  |

|           |          |          |          |
|-----------|----------|----------|----------|
| val+05_34 |          |          |          |
| C         | -1.84218 | 0.44675  | 0.04180  |
| C         | -0.07723 | -0.40310 | 0.14489  |
| N         | -0.95637 | 0.13523  | -0.88045 |
| O         | -1.21136 | -0.10758 | 1.07184  |
| O         | 2.24770  | 1.21714  | 0.86737  |
| H         | -2.68878 | 1.11998  | 0.08335  |
| H         | 0.04060  | -1.49054 | 0.07498  |
| H         | -0.83970 | 0.41209  | -1.84667 |
| H         | 1.47325  | 0.64758  | 0.59084  |
| H         | 2.12596  | 1.29155  | 1.82635  |

|           |          |          |          |
|-----------|----------|----------|----------|
| val+05_35 |          |          |          |
| C         | -1.22988 | 1.18040  | -0.87006 |
| C         | -0.07120 | 0.63064  | -0.05190 |
| N         | -0.81210 | -0.74315 | -0.01334 |
| O         | -1.75295 | -0.30932 | -0.98708 |
| O         | 1.12110  | 0.49760  | -0.76115 |
| H         | -1.93373 | 1.61166  | -0.13308 |
| H         | 0.11530  | 0.97776  | 0.97046  |
| H         | -0.27389 | -1.55778 | -0.33801 |
| H         | -1.28050 | -0.96710 | 0.87478  |
| H         | 1.83526  | 0.26649  | -0.14122 |

|           |          |          |          |
|-----------|----------|----------|----------|
| val+05_36 |          |          |          |
| C         | -0.71181 | 0.63822  | -0.86756 |
| C         | 0.24614  | -0.00608 | 0.10872  |
| N         | -0.04755 | -1.46436 | 0.03236  |
| O         | -1.32226 | -1.69467 | 0.48056  |
| O         | -0.93338 | 1.86150  | -0.43500 |
| H         | 0.12008  | 0.28065  | 1.15728  |
| H         | 1.27582  | 0.20870  | -0.21857 |
| H         | 0.06970  | -1.74188 | -0.95740 |
| H         | 0.66363  | -1.99426 | 0.56134  |
| H         | -1.50968 | 2.32128  | -1.07402 |

|           |          |         |          |
|-----------|----------|---------|----------|
| val+05_37 |          |         |          |
| C         | 0.90987  | 0.54951 | -0.46007 |
| C         | -2.04690 | 1.32346 | 0.92810  |
| N         | 2.09290  | 0.37924 | -1.05081 |

Supplementary Material (ESI) for PCCP  
This journal is © the Owner Societies 2011

|   |          |          |          |
|---|----------|----------|----------|
| O | -1.91136 | 0.14004  | 1.18685  |
| O | 0.53993  | -0.63376 | 0.07754  |
| H | -2.94267 | 1.87729  | 1.25900  |
| H | 2.59185  | -0.51240 | -1.06606 |
| H | 2.53725  | 1.15849  | -1.51348 |
| H | -1.27949 | 1.87050  | 0.35758  |
| H | -0.33119 | -0.48087 | 0.50555  |

|           |          |          |          |
|-----------|----------|----------|----------|
| val+05_38 |          |          |          |
| C         | -0.87120 | 1.04859  | 0.17349  |
| C         | 0.39764  | 0.52845  | 0.21851  |
| N         | 0.42085  | -0.85508 | -0.11868 |
| O         | -0.87618 | 2.39878  | 0.47924  |
| O         | 0.62594  | -1.74764 | 1.06685  |
| H         | 1.37190  | 0.95066  | 0.45703  |
| H         | -0.52095 | -1.05287 | -0.49001 |
| H         | 1.15342  | -1.13019 | -0.77990 |
| H         | -1.79536 | 2.69117  | 0.40203  |
| H         | 0.66284  | -2.65099 | 0.69024  |

|           |          |          |          |
|-----------|----------|----------|----------|
| val+05_39 |          |          |          |
| C         | -1.23303 | 1.78305  | 0.00785  |
| C         | -0.24288 | 1.09679  | 0.12039  |
| N         | 0.41829  | -2.14803 | -0.25974 |
| O         | -2.35955 | 2.49263  | 0.10940  |
| O         | 0.87796  | 0.41804  | 0.17156  |
| H         | -0.14142 | -2.31094 | -1.09613 |
| H         | 1.28752  | -2.66583 | -0.38590 |
| H         | -0.07602 | -2.59278 | 0.51307  |
| H         | -2.59131 | 2.85065  | -0.76531 |
| H         | 0.68974  | -0.59079 | 0.00141  |

|           |          |          |          |
|-----------|----------|----------|----------|
| val+05_40 |          |          |          |
| C         | -0.19313 | 0.69906  | 0.13013  |
| C         | 1.06292  | 1.10861  | 0.05041  |
| N         | -0.59185 | -0.60277 | -0.45188 |
| O         | 0.30969  | -1.28468 | -1.05340 |
| O         | -1.22611 | -1.34891 | 0.77211  |
| H         | -1.01895 | 1.21731  | 0.60123  |
| H         | 1.36135  | 2.05380  | 0.48957  |
| H         | -1.47351 | -0.49597 | -0.98025 |
| H         | 1.80572  | 0.50191  | -0.45506 |
| H         | -0.41113 | -1.76157 | 1.12034  |

|           |          |          |          |
|-----------|----------|----------|----------|
| val+05_41 |          |          |          |
| C         | -0.31989 | 0.75615  | -0.18444 |
| C         | -1.48073 | 1.41753  | -0.24598 |
| N         | -0.09020 | -0.48370 | 0.44998  |
| O         | 0.82670  | 1.24395  | -0.74993 |
| O         | -1.25553 | -1.11607 | 0.93359  |
| H         | -1.51224 | 2.40767  | -0.68305 |
| H         | -2.39112 | 0.98898  | 0.14979  |
| H         | 0.40568  | -1.13028 | -0.16623 |
| H         | 1.58727  | 0.95225  | -0.21630 |
| H         | -1.84364 | -1.24488 | 0.16128  |

|           |          |          |          |
|-----------|----------|----------|----------|
| val+05_42 |          |          |          |
| C         | 0.17311  | -0.17014 | -0.85023 |
| C         | -0.89386 | 0.46126  | -0.06116 |
| N         | -0.16629 | -0.77418 | 0.44098  |
| O         | -0.79008 | 1.59391  | 0.73221  |
| O         | -0.73094 | -2.10096 | 0.43646  |
| H         | 1.15437  | 0.30945  | -0.81795 |
| H         | -1.94482 | 0.25969  | -0.26626 |
| H         | 0.36223  | -0.67504 | 1.30818  |
| H         | 0.10310  | 1.96216  | 0.61959  |
| H         | -0.59560 | -2.33305 | -0.50702 |

|           |          |          |          |
|-----------|----------|----------|----------|
| val+05_43 |          |          |          |
| C         | 0.29391  | 0.61033  | 1.07395  |
| C         | -0.40387 | 1.18361  | -0.15807 |
| N         | 0.00519  | -0.21601 | -0.09102 |
| O         | 0.92367  | -0.61326 | -1.08155 |
| O         | -0.96588 | -1.25298 | 0.04426  |
| H         | 1.36702  | 0.82119  | 1.06777  |
| H         | -1.48235 | 1.33514  | -0.13457 |
| H         | 0.11067  | 1.72477  | -0.95456 |

Supplementary Material (ESI) for PCCP  
This journal is © the Owner Societies 2011

|           |          |          |          |
|-----------|----------|----------|----------|
| H         | 1.49355  | -1.26187 | -0.62175 |
| H         | -0.99901 | -1.32692 | 1.02164  |
| val+05_44 |          |          |          |
| C         | -0.02541 | -0.34018 | -0.39341 |
| C         | 0.52136  | 0.77928  | -1.14011 |
| N         | -0.45010 | 1.04631  | 0.09278  |
| O         | 0.60447  | -1.09359 | 0.59466  |
| O         | -1.04597 | -1.08146 | -0.94995 |
| H         | 1.52498  | 1.01590  | -0.76300 |
| H         | -1.38242 | 1.38698  | -0.12512 |
| H         | -0.11894 | 1.31010  | 1.01903  |
| H         | 1.53635  | -0.82488 | 0.63234  |
| H         | -1.40491 | -1.65946 | -0.25282 |
| val+05_45 |          |          |          |
| C         | -0.12291 | 0.50813  | 0.44685  |
| C         | -0.21583 | -0.80322 | 0.16182  |
| N         | -1.17306 | 1.28929  | 0.92817  |
| O         | 1.04058  | 1.22721  | 0.38279  |
| O         | -1.44502 | -1.45419 | 0.31427  |
| H         | 0.65113  | -1.41313 | -0.08227 |
| H         | -2.05630 | 0.79941  | 0.82175  |
| H         | -1.21378 | 2.20014  | 0.47729  |
| H         | 1.72163  | 0.68026  | -0.04185 |
| H         | -1.74092 | -1.75260 | -0.56211 |
| val+05_46 |          |          |          |
| C         | 0.58235  | -0.39494 | 0.38644  |
| C         | -0.75255 | 0.24633  | 0.44415  |
| N         | -0.21815 | -0.18792 | -0.84330 |
| O         | 0.82845  | -1.67379 | 0.87880  |
| O         | -0.97671 | 1.61166  | 0.62361  |
| H         | 1.48986  | 0.20239  | 0.42872  |
| H         | -1.56653 | -0.31889 | 0.89752  |
| H         | -0.64920 | -1.05403 | -1.16968 |
| H         | -0.00280 | -2.06789 | 1.19078  |
| H         | -0.42512 | 2.07547  | -0.02923 |
| val+05_47 |          |          |          |
| C         | 0.54426  | 0.05123  | 0.27785  |
| C         | -0.52487 | 0.84589  | -0.37387 |
| N         | -0.62539 | -0.64102 | -0.24407 |
| O         | 1.79053  | -0.23229 | -0.26540 |
| O         | -1.48796 | -1.01504 | 0.85541  |
| H         | 0.61108  | 0.10706  | 1.36052  |
| H         | -1.16844 | 1.43730  | 0.27190  |
| H         | -0.43351 | 1.18960  | -1.40197 |
| H         | 1.70453  | -0.26422 | -1.23265 |
| H         | -2.20903 | -1.47980 | 0.39797  |
| val+05_48 |          |          |          |
| C         | -0.00788 | 0.00494  | 0.01549  |
| C         | -1.28458 | 0.65460  | -0.35720 |
| N         | -1.01053 | 0.15028  | 1.03254  |
| O         | 1.14099  | 0.75448  | 0.24956  |
| O         | 0.22918  | -1.30898 | -0.38834 |
| H         | -1.98067 | 0.09323  | -0.97515 |
| H         | -1.34285 | 1.73707  | -0.43653 |
| H         | -1.47703 | -0.74776 | 1.16349  |
| H         | 1.47024  | 1.07469  | -0.60694 |
| H         | 0.53693  | -1.29695 | -1.31023 |
| val+05_49 |          |          |          |
| C         | 0.91864  | -0.34173 | 0.38684  |
| C         | 2.20028  | -0.56253 | 0.40901  |
| N         | -0.32890 | -0.13865 | 0.34454  |
| O         | -2.90191 | -0.35230 | -0.55328 |
| O         | -1.04746 | 0.59520  | 1.16853  |
| H         | 2.89463  | 0.08633  | -0.12275 |
| H         | 2.61942  | -1.40217 | 0.96145  |
| H         | -0.89684 | -0.57993 | -0.40466 |
| H         | -2.55747 | 0.15936  | 0.21967  |
| H         | -3.02619 | 0.32290  | -1.23905 |
| val+05_4  |          |          |          |
| C         | 0.33877  | 1.51021  | 0.01631  |

Supplementary Material (ESI) for PCCP  
This journal is © the Owner Societies 2011

|   |          |          |          |
|---|----------|----------|----------|
| C | -0.74813 | 2.24583  | 0.52778  |
| N | 0.71651  | 0.26970  | -0.22459 |
| O | 0.91465  | 2.60512  | -0.30471 |
| O | -0.86926 | -1.92842 | 0.68712  |
| H | -0.54273 | 2.51295  | 1.57578  |
| H | 1.56318  | 0.10604  | -0.75619 |
| H | 0.15843  | -0.53341 | 0.09766  |
| H | -0.35694 | -2.39153 | 1.36974  |
| H | -0.92658 | -2.57319 | -0.03680 |

val+05\_50

|   |          |          |          |
|---|----------|----------|----------|
| C | -0.03414 | -0.07650 | 0.37334  |
| C | 1.24589  | 0.03820  | 0.08905  |
| N | -1.25671 | -0.14396 | 0.56121  |
| O | 2.04741  | -1.07358 | -0.10503 |
| O | -3.47487 | 0.01569  | -1.38396 |
| H | 1.70842  | 1.02208  | 0.08728  |
| H | -1.52938 | -0.26433 | 1.54492  |
| H | -2.71527 | -0.05362 | -0.76772 |
| H | 2.68717  | -0.85489 | -0.80219 |
| H | -3.72882 | 0.94832  | -1.31440 |

val+05\_51

|   |          |          |          |
|---|----------|----------|----------|
| C | -1.03546 | 0.35864  | -0.04235 |
| C | 0.27596  | 0.08534  | 0.01469  |
| N | -1.76770 | -0.98628 | -0.14731 |
| O | 1.25184  | 1.06398  | 0.05380  |
| O | 0.87451  | -1.16552 | 0.08015  |
| H | -2.43455 | -0.96946 | -0.92228 |
| H | -2.32311 | -1.17128 | 0.69230  |
| H | -1.14176 | -1.79626 | -0.28421 |
| H | 0.77259  | 1.89817  | -0.09397 |
| H | 1.70168  | -1.13234 | -0.43162 |

val+05\_52

|   |          |          |          |
|---|----------|----------|----------|
| C | 0.65376  | -0.60145 | 0.11607  |
| C | -0.66154 | -0.29261 | 0.78758  |
| N | 1.44166  | 0.33874  | -0.22902 |
| O | -0.77879 | 1.90589  | 0.03997  |
| O | -0.77625 | 1.05242  | 1.22122  |
| H | 0.85301  | -1.66502 | -0.06488 |
| H | -0.76338 | -0.88911 | 1.70323  |
| H | -1.48871 | -0.56670 | 0.11515  |
| H | 0.17401  | 1.81560  | -0.20829 |
| H | 2.28413  | -0.02284 | -0.68253 |

val+05\_53

|   |          |          |          |
|---|----------|----------|----------|
| C | -0.62814 | -0.14072 | -0.01621 |
| C | -0.01473 | 1.04877  | -0.01371 |
| N | 0.11754  | -1.37536 | 0.06850  |
| O | 1.30903  | 1.35293  | 0.04501  |
| O | 2.21037  | 0.21581  | -0.13223 |
| H | -1.71413 | -0.16279 | -0.07331 |
| H | -0.57692 | 1.97846  | -0.03909 |
| H | -0.11661 | -2.00210 | -0.70129 |
| H | 1.59057  | -0.57785 | -0.00094 |
| H | -0.10618 | -1.87676 | 0.92829  |

val+05\_54

|   |          |          |          |
|---|----------|----------|----------|
| C | -0.79986 | 1.27448  | -0.22291 |
| C | 0.50280  | 0.98144  | -0.11570 |
| N | 0.17484  | -1.33603 | 0.13162  |
| O | -1.86562 | 0.41848  | -0.18756 |
| O | 1.12411  | -0.24624 | 0.05727  |
| H | -1.08961 | 2.31223  | -0.35551 |
| H | 1.25432  | 1.76085  | -0.16014 |
| H | 0.49081  | -1.97730 | -0.59787 |
| H | 0.39877  | -1.78742 | 1.02014  |
| H | -1.46047 | -0.47380 | -0.06213 |

val+05\_55

|   |          |          |          |
|---|----------|----------|----------|
| C | -0.01432 | 0.03453  | 0.22999  |
| C | -1.26741 | 0.43862  | -0.00455 |
| N | 0.54147  | -1.24082 | 0.05531  |
| O | 0.90777  | 0.94358  | 0.70368  |
| O | 2.10156  | 0.94713  | -0.17347 |
| H | -2.06101 | -0.27790 | -0.18544 |

Supplementary Material (ESI) for PCCP  
This journal is © the Owner Societies 2011

|   |          |          |          |
|---|----------|----------|----------|
| H | -1.51076 | 1.49410  | 0.00503  |
| H | -0.08558 | -1.89494 | -0.40132 |
| H | 2.19833  | -0.01855 | -0.33167 |
| H | 0.90125  | -1.64314 | 0.91954  |

val+05\_56

|   |          |          |          |
|---|----------|----------|----------|
| C | 0.37369  | 0.41409  | -0.08137 |
| C | 0.02874  | 1.71665  | -0.02285 |
| N | -0.38701 | -1.79823 | -0.07159 |
| O | -0.85857 | -0.48369 | -0.00241 |
| O | 1.44453  | -0.24679 | -0.18401 |
| H | -1.00830 | 2.01365  | 0.06916  |
| H | 0.79938  | 2.47618  | -0.06738 |
| H | -0.77773 | -2.26758 | -0.89350 |
| H | 0.68428  | -1.62000 | -0.15508 |
| H | -0.64031 | -2.30679 | 0.78034  |

val+05\_58

|   |          |          |          |
|---|----------|----------|----------|
| C | 0.37680  | 0.88712  | 0.18803  |
| C | 0.70088  | -0.40335 | -0.18490 |
| N | -0.32426 | -1.45334 | -0.02905 |
| O | -0.94957 | 0.99478  | 0.67051  |
| O | 1.07464  | 1.92028  | 0.15144  |
| H | 1.65432  | -0.72393 | -0.57034 |
| H | -0.06605 | -2.20136 | 0.62642  |
| H | -1.05252 | 1.93507  | 0.89319  |
| H | -1.16978 | -1.00320 | 0.34465  |
| H | -0.59027 | -1.91576 | -0.90714 |

val+05\_5

|   |          |          |          |
|---|----------|----------|----------|
| C | 0.50406  | -0.22353 | 0.16876  |
| C | -0.63671 | 0.21896  | -0.41867 |
| N | 0.55052  | -1.85774 | 0.07873  |
| O | 1.49842  | 0.23491  | 0.74614  |
| O | -0.87755 | 1.59617  | -0.52802 |
| H | -1.36909 | -0.44228 | -0.87258 |
| H | 0.59828  | -2.23453 | 1.02879  |
| H | 1.41700  | -2.12957 | -0.39295 |
| H | -0.23584 | -2.29642 | -0.40634 |
| H | -1.38608 | 1.87573  | 0.25133  |

val+05\_61

|   |          |          |          |
|---|----------|----------|----------|
| C | -0.10561 | 1.22566  | -0.51299 |
| C | -0.34810 | -1.22958 | 0.04825  |
| N | 0.53224  | -0.04601 | -0.12172 |
| O | 0.36412  | 1.94464  | -1.35685 |
| O | 1.01121  | 0.45937  | 1.07798  |
| H | -0.98311 | 1.41329  | 0.11516  |
| H | -1.18562 | -0.93017 | 0.67859  |
| H | 0.24425  | -1.99139 | 0.55627  |
| H | -0.69197 | -1.58261 | -0.92703 |
| H | 1.29089  | -0.25711 | -0.78645 |

val+05\_62

|   |          |          |          |
|---|----------|----------|----------|
| C | 0.72912  | 1.43453  | -0.67213 |
| C | -0.96984 | -1.22933 | -0.02386 |
| N | 0.95105  | 0.09422  | -0.09108 |
| O | 1.62432  | 1.08216  | 0.58865  |
| O | 0.05103  | -0.58497 | 0.76411  |
| H | -0.22036 | 1.72192  | -0.18024 |
| H | -1.55228 | -0.49293 | -0.58628 |
| H | -0.53708 | -1.97470 | -0.70029 |
| H | -1.60306 | -1.72575 | 0.71184  |
| H | 1.57070  | -0.58307 | -0.54801 |

val+05\_63

|   |          |          |          |
|---|----------|----------|----------|
| C | 0.15198  | 0.09046  | -0.11100 |
| C | 0.40306  | -1.36972 | 0.05612  |
| N | -1.02640 | 0.62469  | -0.34105 |
| O | 1.16997  | 0.88538  | -0.02037 |
| O | 0.82065  | 2.27191  | -0.19237 |
| H | -0.16615 | -1.75619 | 0.90781  |
| H | 1.46701  | -1.54250 | 0.22531  |
| H | 0.08530  | -1.91434 | -0.83880 |
| H | -1.87521 | 0.08546  | -0.42744 |
| H | -0.96822 | 1.64725  | -0.41931 |

|           |          |          |          |
|-----------|----------|----------|----------|
| val+05_64 |          |          |          |
| C         | 0.49786  | 1.05662  | -0.69739 |
| C         | -0.10786 | -1.42298 | -0.33847 |
| N         | 0.21605  | -0.15636 | 0.36439  |
| O         | -0.82650 | 1.54292  | -0.92337 |
| O         | 0.09267  | 2.19773  | 0.05753  |
| H         | -1.05541 | -1.28898 | -0.86143 |
| H         | 0.68630  | -1.62080 | -1.05950 |
| H         | -0.18672 | -2.24402 | 0.37533  |
| H         | -0.53864 | 0.11748  | 1.00523  |
| H         | 1.06685  | -0.26941 | 0.92098  |

|           |          |          |          |
|-----------|----------|----------|----------|
| val+05_65 |          |          |          |
| C         | 0.56419  | -0.46168 | -0.17224 |
| C         | -0.96652 | 1.30671  | 0.13752  |
| N         | 0.90707  | -1.70953 | 0.25968  |
| O         | -0.48178 | 0.01756  | 0.54524  |
| O         | 1.08996  | 0.13139  | -1.10239 |
| H         | -0.18300 | 2.06292  | 0.23179  |
| H         | -1.32011 | 1.27836  | -0.89638 |
| H         | -1.79218 | 1.53267  | 0.81248  |
| H         | 1.80764  | -2.05509 | -0.03977 |
| H         | 0.58803  | -2.01171 | 1.17006  |

|           |          |          |          |
|-----------|----------|----------|----------|
| val+05_67 |          |          |          |
| C         | -1.31633 | 1.37387  | -1.76400 |
| C         | -0.17728 | 1.13772  | -0.18679 |
| N         | 0.72908  | -1.86068 | 0.77461  |
| O         | 0.02977  | 1.33395  | -1.60104 |
| O         | -1.59474 | 1.20587  | -0.44709 |
| H         | 0.18022  | 1.97858  | 0.40985  |
| H         | 0.15298  | 0.15135  | 0.16952  |
| H         | 0.28573  | -2.16410 | 1.64178  |
| H         | 1.73150  | -1.96841 | 0.92997  |
| H         | 0.48406  | -2.56875 | 0.08239  |

|           |          |          |          |
|-----------|----------|----------|----------|
| val+05_69 |          |          |          |
| C         | -0.58568 | -1.76223 | 0.11524  |
| C         | 1.05547  | 1.96476  | -0.39022 |
| N         | -0.12021 | -0.56163 | -0.01300 |
| O         | 1.80986  | 1.15169  | -0.91251 |
| O         | -0.64468 | 0.53262  | 0.40535  |
| H         | -0.00934 | -2.57707 | -0.30072 |
| H         | -1.52653 | -1.90889 | 0.62940  |
| H         | 0.27720  | 2.49582  | -0.96427 |
| H         | 1.19037  | 2.30591  | 0.65027  |
| H         | 0.78394  | -0.42799 | -0.50844 |

|          |          |          |          |
|----------|----------|----------|----------|
| val+05_6 |          |          |          |
| C        | 0.12366  | -0.11435 | -0.16331 |
| C        | 1.16167  | 0.77892  | -0.13956 |
| N        | 0.60733  | -1.50275 | 0.02757  |
| O        | 2.37291  | 0.44291  | 0.12517  |
| O        | -1.16271 | 0.04247  | -0.62377 |
| H        | 0.89977  | 1.83295  | -0.34646 |
| H        | 0.22662  | -1.99531 | 0.84285  |
| H        | 1.63142  | -1.31196 | 0.17509  |
| H        | 0.47891  | -2.11187 | -0.78900 |
| H        | -1.77378 | 0.08309  | 0.13292  |

|           |          |          |          |
|-----------|----------|----------|----------|
| val+05_70 |          |          |          |
| C         | 1.01031  | 0.77821  | -0.02253 |
| C         | -0.83541 | -1.12468 | 0.31971  |
| N         | 0.32759  | -0.48807 | -0.46391 |
| O         | 0.19195  | 1.74433  | 0.51044  |
| O         | 1.17483  | 0.92877  | 1.33288  |
| H         | 1.82266  | 1.09550  | -0.67849 |
| H         | -0.41177 | -1.23294 | 1.33121  |
| H         | -1.55594 | -0.29449 | 0.39699  |
| H         | 0.01068  | -0.32083 | -1.42435 |
| H         | 1.06681  | -1.19111 | -0.56135 |

|           |          |          |         |
|-----------|----------|----------|---------|
| val+05_71 |          |          |         |
| C         | 1.12769  | -0.43933 | 0.15058 |
| C         | -1.34090 | -0.50589 | 0.01494 |
| N         | -0.03572 | 0.10162  | 0.26446 |
| O         | -0.16643 | 1.41074  | 0.67549 |

Supplementary Material (ESI) for PCCP  
This journal is © the Owner Societies 2011

|   |          |          |          |
|---|----------|----------|----------|
| O | 1.07537  | 1.99162  | 0.92545  |
| H | 1.96202  | 0.20422  | 0.39843  |
| H | 1.19348  | -1.46732 | -0.17432 |
| H | -1.87142 | 0.10557  | -0.71662 |
| H | -1.19079 | -1.51380 | -0.36871 |
| H | -1.89901 | -0.53294 | 0.95249  |

val+05\_72

|   |          |          |          |
|---|----------|----------|----------|
| C | -0.86271 | -0.37302 | 0.32501  |
| C | 0.41764  | -1.13174 | 0.07734  |
| N | -0.85638 | 0.89829  | 0.41220  |
| O | 1.58532  | -0.34262 | 0.23273  |
| O | 1.57857  | 0.67758  | -0.80791 |
| H | -1.76891 | -0.98741 | 0.39526  |
| H | 0.52547  | -1.93557 | 0.81686  |
| H | 0.38033  | -1.59659 | -0.91967 |
| H | -1.79653 | 1.27038  | 0.56722  |
| H | 0.85590  | 1.24879  | -0.44885 |

val+05\_73

|   |          |          |          |
|---|----------|----------|----------|
| C | 1.37534  | 0.00704  | 0.28789  |
| C | -2.08747 | 0.83004  | -0.04008 |
| N | 0.52722  | -1.01247 | 0.01128  |
| O | 1.92920  | 0.70835  | -0.54999 |
| O | -1.71573 | 1.97276  | -0.19649 |
| H | 1.50490  | 0.16241  | 1.37424  |
| H | -2.32501 | 0.16398  | -0.89166 |
| H | -2.22134 | 0.38427  | 0.96418  |
| H | 0.40796  | -1.31432 | -0.94798 |
| H | 0.20383  | -1.62906 | 0.74420  |

val+05\_74

|   |          |          |          |
|---|----------|----------|----------|
| C | -1.46844 | -0.68599 | -0.03359 |
| C | 1.79163  | 1.25662  | -0.20054 |
| N | -0.38140 | -1.47377 | -0.12411 |
| O | -1.45739 | 0.54514  | -0.00109 |
| O | 2.16278  | 0.09791  | -0.24527 |
| H | -2.41201 | -1.25909 | 0.01093  |
| H | 0.72134  | 1.51400  | -0.13077 |
| H | 2.51721  | 2.08947  | -0.22826 |
| H | 0.55293  | -1.06347 | -0.17193 |
| H | -0.47813 | -2.47922 | -0.14467 |

val+05\_76

|   |          |          |          |
|---|----------|----------|----------|
| C | -0.59030 | 0.92364  | -0.24615 |
| C | -0.53994 | -0.48525 | 0.31962  |
| N | 0.88443  | -0.90840 | 0.23079  |
| O | -1.35025 | 1.77372  | 0.16729  |
| O | 1.67080  | 0.08474  | 0.76467  |
| H | 0.07362  | 1.10936  | -1.11198 |
| H | -1.19970 | -1.16523 | -0.23639 |
| H | -0.81169 | -0.47478 | 1.37496  |
| H | 1.11471  | -1.09879 | -0.75948 |
| H | 1.00402  | -1.81471 | 0.71056  |

val+05\_77

|   |          |          |          |
|---|----------|----------|----------|
| C | -1.18680 | 0.23255  | 0.02234  |
| C | 0.23224  | 0.76427  | 0.12423  |
| N | 1.16262  | -1.35068 | 0.05605  |
| O | -2.08032 | 0.54916  | 0.78006  |
| O | 1.15335  | -0.04480 | -0.57934 |
| H | -1.35827 | -0.45655 | -0.83118 |
| H | 0.50462  | 0.89033  | 1.18081  |
| H | 0.27249  | 1.74935  | -0.36042 |
| H | 2.07632  | -1.38951 | 0.51656  |
| H | 1.24134  | -1.98362 | -0.74171 |

val+05\_78

|   |          |          |          |
|---|----------|----------|----------|
| C | 0.51755  | 0.47160  | -0.69470 |
| C | -0.00513 | -0.44336 | 0.39336  |
| N | 0.38765  | -1.82508 | 0.13484  |
| O | 0.94739  | 0.10950  | -1.77072 |
| O | 0.40940  | 1.76967  | -0.34136 |
| H | 0.71798  | 2.30359  | -1.09877 |
| H | -1.09399 | -0.26470 | 0.45070  |
| H | 0.40767  | -0.11213 | 1.35271  |
| H | -0.07937 | -2.42694 | 0.81082  |

Supplementary Material (ESI) for PCCP  
This journal is © the Owner Societies 2011

|           |          |          |          |
|-----------|----------|----------|----------|
| H         | 0.03215  | -2.09974 | -0.77978 |
| val+05_79 |          |          |          |
| C         | -1.28004 | 0.74911  | 0.77154  |
| C         | 0.89949  | 0.22485  | -0.02044 |
| N         | 0.64396  | -1.10277 | -0.49815 |
| O         | 0.00564  | 0.55470  | 1.08990  |
| O         | -2.12817 | 0.95316  | 1.60980  |
| H         | -1.48673 | 0.71788  | -0.31086 |
| H         | 0.74057  | 0.94707  | -0.82557 |
| H         | 1.88739  | 0.38462  | 0.41933  |
| H         | 1.22717  | -1.79440 | -0.03539 |
| H         | 0.80350  | -1.17152 | -1.49846 |
| val+05_7  |          |          |          |
| C         | 0.73526  | 0.32304  | -0.05277 |
| C         | -0.26717 | -0.61761 | -0.16947 |
| N         | 0.24368  | -1.98478 | 0.00744  |
| O         | 1.95321  | 0.06457  | 0.16575  |
| O         | 0.34334  | 1.64262  | -0.19389 |
| H         | -1.32231 | -0.48425 | -0.33612 |
| H         | -0.13501 | -2.48948 | 0.81731  |
| H         | 1.25995  | -1.83508 | 0.16478  |
| H         | 0.13117  | -2.59977 | -0.80666 |
| H         | 1.16618  | 2.15046  | -0.08587 |
| val+05_80 |          |          |          |
| C         | 1.11646  | 0.05166  | -0.30310 |
| C         | 0.03556  | 1.13132  | -0.27650 |
| N         | -1.04830 | -1.04459 | 0.57700  |
| O         | 2.06096  | 0.05250  | 0.46045  |
| O         | 0.05377  | 2.05610  | 0.51074  |
| H         | 1.00497  | -0.69334 | -1.11448 |
| H         | -0.72690 | 1.04009  | -1.07403 |
| H         | -1.75520 | -0.57745 | 1.14330  |
| H         | -0.57329 | -1.70793 | 1.18769  |
| H         | -1.54342 | -1.58987 | -0.12727 |
| val+05_81 |          |          |          |
| C         | -0.80421 | -0.86417 | -0.10528 |
| C         | -1.01156 | 0.64937  | -0.12184 |
| N         | 1.50238  | 0.23536  | 0.25934  |
| O         | -0.91530 | -1.55046 | -1.10117 |
| O         | -1.29878 | 1.25920  | -1.13221 |
| H         | -0.60961 | -1.29229 | 0.89703  |
| H         | -0.94527 | 1.13487  | 0.87091  |
| H         | 2.03123  | -0.51440 | -0.18425 |
| H         | 1.79909  | 0.27310  | 1.23352  |
| H         | 1.80283  | 1.10571  | -0.17755 |
| val+05_83 |          |          |          |
| C         | -0.40537 | 1.53519  | -0.13659 |
| C         | 0.00562  | -1.78951 | -0.02769 |
| N         | 0.52371  | -0.57141 | -0.65495 |
| O         | 0.59406  | 1.85822  | 0.46967  |
| O         | -0.60781 | 0.35381  | -0.73439 |
| H         | -1.28869 | 2.16745  | -0.29480 |
| H         | -0.44864 | -1.62065 | 0.95757  |
| H         | 0.85874  | -2.46705 | 0.07923  |
| H         | -0.72778 | -2.25519 | -0.69066 |
| H         | 1.15695  | -0.10127 | -0.00067 |
| val+05_84 |          |          |          |
| C         | -0.60635 | 0.68156  | -0.02693 |
| C         | 0.79663  | 0.97335  | 0.38381  |
| N         | 0.49282  | -0.20484 | -0.45149 |
| O         | 0.56912  | -1.49057 | 0.15508  |
| O         | -0.45841 | -2.27626 | -0.45722 |
| H         | -1.27183 | 0.18962  | 0.67204  |
| H         | -1.06339 | 1.26334  | -0.81953 |
| H         | 1.35897  | 1.75663  | -0.11244 |
| H         | 1.11488  | 0.69885  | 1.38303  |
| H         | 0.74155  | -0.23198 | -1.44445 |
| val+05_85 |          |          |          |
| C         | -0.95491 | 1.22691  | -0.43194 |
| C         | 0.80192  | -1.99669 | 0.32285  |



Supplementary Material (ESI) for PCCP  
 This journal is © the Owner Societies 2011

|   |          |          |          |
|---|----------|----------|----------|
| N | 0.20494  | 0.84268  | 0.32676  |
| O | 0.15780  | 0.78523  | -1.17035 |
| O | 0.62103  | -2.70049 | 1.29356  |
| H | -1.80198 | 0.54430  | -0.37988 |
| H | -1.20285 | 2.28385  | -0.52902 |
| H | 1.78020  | -1.52764 | 0.10591  |
| H | 0.00987  | -1.79186 | -0.42022 |
| H | 0.75207  | 1.69181  | 0.51262  |

|           |          |          |          |
|-----------|----------|----------|----------|
| val+05_86 |          |          |          |
| C         | 0.32274  | -1.06567 | -0.78578 |
| C         | 0.62901  | 0.32312  | -0.19899 |
| N         | -0.70859 | 1.03623  | -0.16416 |
| O         | 1.54727  | -1.83981 | -0.62524 |
| O         | 0.40975  | -2.03557 | 0.30931  |
| H         | 1.25704  | 0.89207  | -0.88961 |
| H         | 1.05107  | 0.35526  | 0.81177  |
| H         | -0.65101 | 2.05638  | -0.21911 |
| H         | -1.23542 | 0.66709  | -0.97318 |
| H         | -1.24177 | 0.79639  | 0.67689  |

|           |          |          |          |
|-----------|----------|----------|----------|
| val+05_88 |          |          |          |
| C         | 0.29035  | -0.17905 | 0.44662  |
| C         | -0.58315 | 0.89458  | -0.15066 |
| N         | 0.41838  | -1.34756 | -0.31374 |
| O         | 1.40432  | 0.28279  | 1.20597  |
| O         | 0.19732  | -0.38454 | 1.82926  |
| H         | -0.14989 | 1.25979  | -1.08762 |
| H         | -1.57900 | 0.49514  | -0.36335 |
| H         | -0.66620 | 1.72622  | 0.55065  |
| H         | 1.17163  | -1.93866 | 0.02727  |
| H         | 0.54164  | -1.16180 | -1.30441 |

|          |          |          |          |
|----------|----------|----------|----------|
| val+05_8 |          |          |          |
| C        | 0.36278  | 1.84775  | 0.12408  |
| C        | -0.65247 | 1.43802  | -0.60050 |
| N        | 0.92257  | -1.42704 | 0.14300  |
| O        | 1.26885  | 2.22414  | 0.77102  |
| O        | -0.43590 | -1.77724 | -0.17549 |
| H        | -0.87121 | 0.37443  | -0.64446 |
| H        | -1.25409 | 2.16386  | -1.13503 |
| H        | 1.37183  | -2.28836 | 0.46289  |
| H        | 1.37637  | -1.18397 | -0.74034 |
| H        | -0.40891 | -2.44849 | -0.88248 |

|           |          |          |          |
|-----------|----------|----------|----------|
| val+05_90 |          |          |          |
| C         | -0.10050 | -0.24957 | -0.45881 |
| C         | -0.80627 | 1.01680  | -0.12920 |
| N         | 0.59535  | 0.79968  | 0.38579  |
| O         | 1.62021  | 1.51263  | -0.08102 |
| O         | -0.43529 | -1.45359 | 0.11452  |
| H         | 0.40634  | -0.33121 | -1.41587 |
| H         | -1.59433 | 1.00268  | 0.61931  |
| H         | -0.85293 | 1.80070  | -0.87614 |
| H         | 0.60918  | 0.53774  | 1.38199  |
| H         | -1.33207 | -1.40656 | 0.48413  |

|           |          |          |          |
|-----------|----------|----------|----------|
| val+05_91 |          |          |          |
| C         | -0.60646 | 1.15153  | -0.46507 |
| C         | 0.60503  | 1.00037  | 0.42420  |
| N         | -0.03908 | -0.19285 | -0.17129 |
| O         | 0.49972  | -0.95464 | -1.06024 |
| O         | -0.81815 | -0.88942 | 0.87687  |
| H         | -1.56364 | 1.36615  | -0.00471 |
| H         | -0.46453 | 1.45319  | -1.49656 |
| H         | 0.48290  | 1.11725  | 1.49500  |
| H         | 1.58722  | 1.19493  | 0.00975  |
| H         | -1.23170 | -1.58911 | 0.33385  |

|           |          |          |          |
|-----------|----------|----------|----------|
| val+05_92 |          |          |          |
| C         | 0.74860  | 1.17888  | -0.29365 |
| C         | -0.71502 | 0.85542  | -0.06040 |
| N         | -0.95915 | -0.55583 | -0.31873 |
| O         | 1.34122  | 2.07643  | 0.26721  |
| O         | -0.32671 | -1.33768 | 0.70208  |
| H         | -1.30491 | 1.42959  | -0.79026 |
| H         | -1.00706 | 1.19572  | 0.94685  |

Supplementary Material (ESI) for PCCP  
This journal is © the Owner Societies 2011

|   |          |          |          |
|---|----------|----------|----------|
| H | -1.95991 | -0.74818 | -0.25874 |
| H | 1.24343  | 0.53437  | -1.04966 |
| H | -0.70720 | -1.05462 | 1.55861  |

val+05\_93

|   |          |          |          |
|---|----------|----------|----------|
| C | 0.98712  | -0.21586 | 1.09082  |
| C | -0.43666 | 0.06499  | 0.25136  |
| N | -0.50673 | -1.27204 | -0.47634 |
| O | 1.43243  | 0.78159  | 1.64262  |
| O | -0.33301 | 1.12185  | -0.64896 |
| H | -1.31504 | 0.12365  | 0.90188  |
| H | -1.36117 | -1.81628 | -0.34520 |
| H | -0.33345 | -1.15921 | -1.47858 |
| H | 0.33143  | -1.75039 | -0.02041 |
| H | -1.21691 | 1.37310  | -0.96648 |

val+05\_94

|   |          |          |          |
|---|----------|----------|----------|
| C | 0.61865  | 0.19017  | -0.26058 |
| C | 1.40169  | -0.82149 | 0.08572  |
| N | -0.59677 | 0.51590  | 0.48685  |
| O | -0.67690 | 1.75855  | 0.84025  |
| O | -1.75801 | 0.09525  | -0.43223 |
| H | 0.78378  | 0.89987  | -1.06128 |
| H | 2.31846  | -1.01736 | -0.45973 |
| H | 1.16643  | -1.48083 | 0.91704  |
| H | -0.74922 | -0.16116 | 1.25313  |
| H | -2.05981 | 0.99219  | -0.67924 |

val+05\_95

|   |          |          |          |
|---|----------|----------|----------|
| C | 1.73860  | -0.49956 | -0.01158 |
| C | 0.00424  | 1.04537  | -0.23498 |
| N | 0.38147  | -0.16781 | -0.15380 |
| O | 2.43891  | -0.14004 | 0.91202  |
| O | -2.32431 | -1.25696 | -0.32633 |
| H | 2.08468  | -1.19465 | -0.79446 |
| H | -1.06328 | 1.25342  | -0.29355 |
| H | 0.69990  | 1.88870  | -0.26291 |
| H | -1.35009 | -1.18581 | -0.28146 |
| H | -2.58600 | -1.28184 | 0.60686  |

val+05\_96

|   |          |          |          |
|---|----------|----------|----------|
| C | 0.49047  | 0.79613  | -0.19234 |
| C | 1.15582  | -0.35300 | -0.02123 |
| N | -0.91036 | 0.87135  | -0.37418 |
| O | -1.46120 | 1.83854  | 0.56420  |
| O | 0.48528  | -1.55354 | 0.04383  |
| H | 1.02381  | 1.73429  | -0.29584 |
| H | 2.24092  | -0.38837 | 0.00477  |
| H | -1.96160 | 2.43014  | -0.02160 |
| H | -1.33233 | -0.01679 | -0.10041 |
| H | 1.08500  | -2.23165 | 0.38941  |

val+05\_97

|   |          |          |          |
|---|----------|----------|----------|
| C | 0.33216  | -0.04673 | -0.61635 |
| C | 0.98394  | -0.95615 | 0.26913  |
| N | -1.00327 | 0.13171  | -0.51860 |
| O | 2.19783  | -1.18070 | 0.29403  |
| O | -1.66942 | 1.42554  | 0.50077  |
| H | 0.87361  | 0.59516  | -1.29936 |
| H | 0.29590  | -1.50683 | 0.95220  |
| H | -1.48900 | 0.49638  | -1.33262 |
| H | -1.53396 | -0.60900 | -0.06479 |
| H | -0.93790 | 1.45903  | 1.14399  |

val+05\_98

|   |          |          |          |
|---|----------|----------|----------|
| C | 1.18310  | 0.28916  | -0.01548 |
| C | -0.50749 | 2.05809  | -0.01790 |
| N | -0.12764 | 0.72676  | -0.01708 |
| O | -1.66564 | 2.42305  | -0.01983 |
| O | 1.50293  | -0.88366 | -0.01502 |
| H | 1.91275  | 1.11416  | -0.01479 |
| H | 0.34975  | 2.74994  | -0.01658 |
| H | -0.86459 | 0.02518  | -0.01815 |
| H | -0.55100 | -3.50750 | 0.08914  |
| H | -0.12146 | -2.90048 | 0.06619  |

val+05\_99

Supplementary Material (ESI) for PCCP  
This journal is © the Owner Societies 2011

|   |          |          |          |
|---|----------|----------|----------|
| C | 0.47822  | 0.28188  | 0.15141  |
| C | 1.27550  | -0.74916 | -0.17036 |
| N | -0.91751 | 0.17654  | 0.29077  |
| O | -1.60196 | 1.12924  | -0.55071 |
| O | 0.89368  | 1.53064  | 0.50212  |
| H | 2.35369  | -0.68253 | -0.06771 |
| H | 0.85585  | -1.69016 | -0.50627 |
| H | -2.03977 | 1.70690  | 0.09574  |
| H | -1.23239 | -0.73719 | -0.02734 |
| H | 1.84258  | 1.60363  | 0.30935  |

val+05\_9

|   |          |          |          |
|---|----------|----------|----------|
| C | -0.41895 | -0.59654 | -0.23791 |
| C | -0.20790 | 0.76494  | -0.30906 |
| N | 0.83563  | -1.33478 | -0.03264 |
| O | 0.91637  | 1.33350  | -0.20636 |
| O | -1.33703 | 1.54002  | -0.50799 |
| H | 1.54820  | -0.57927 | 0.00091  |
| H | 0.88984  | -1.86553 | 0.84440  |
| H | 1.08841  | -1.98161 | -0.78870 |
| H | -1.33331 | -1.15807 | -0.32463 |
| H | -1.00096 | 2.45283  | -0.53013 |

val+07\_100

|   |          |          |          |
|---|----------|----------|----------|
| C | -0.90919 | 0.43940  | -0.09175 |
| C | 0.36189  | 0.24635  | 0.34342  |
| N | 0.69247  | -1.35672 | 0.32171  |
| O | 1.32505  | 0.91120  | 0.74684  |
| O | -1.41030 | 1.74164  | -0.23127 |
| H | 1.50716  | -1.51186 | -0.27769 |
| H | -1.56122 | -0.37123 | -0.40393 |
| H | -0.06868 | -1.95926 | -0.00015 |
| H | 0.95963  | -1.64547 | 1.26623  |
| H | -1.85801 | 1.98216  | 0.59689  |

val+07\_101

|   |          |          |          |
|---|----------|----------|----------|
| C | -0.09200 | 0.85966  | 1.39754  |
| C | -0.61953 | 0.71035  | -0.05786 |
| N | -0.39675 | -0.71544 | -0.42589 |
| O | -0.75974 | -1.51579 | 0.63677  |
| O | 1.21845  | 0.91364  | 1.40586  |
| H | -1.69579 | 0.87974  | -0.08492 |
| H | -0.11725 | 1.38121  | -0.77286 |
| H | -0.92207 | -0.94005 | -1.28766 |
| H | 0.59445  | -0.85097 | -0.68597 |
| H | 1.67752  | 0.86986  | 0.52809  |

val+07\_102

|   |          |          |          |
|---|----------|----------|----------|
| C | -0.10753 | 0.14144  | 1.18755  |
| C | 0.29480  | 0.04214  | -0.07043 |
| N | 0.20105  | -1.25790 | -0.79731 |
| O | -0.30217 | -2.30448 | -0.09189 |
| O | 0.82409  | 0.95209  | -0.92287 |
| H | -0.04924 | 1.07363  | 1.73682  |
| H | -0.50074 | -0.75322 | 1.65130  |
| H | -0.34859 | -1.05605 | -1.65439 |
| H | 1.15768  | -1.44331 | -1.15497 |
| H | 0.89705  | 1.81367  | -0.47851 |

val+07\_103

|   |          |          |          |
|---|----------|----------|----------|
| C | 0.72056  | 0.79894  | -0.72339 |
| C | -0.62260 | 0.97319  | -0.05500 |
| N | -0.01468 | -0.37739 | -0.20501 |
| O | -0.51648 | -1.31311 | -0.93541 |
| O | 0.62340  | -0.82425 | 1.05334  |
| H | 1.61435  | 1.07562  | -0.17582 |
| H | -1.50165 | 1.11122  | -0.67410 |
| H | -0.65170 | 1.36366  | 0.95536  |
| H | 0.77377  | 0.81402  | -1.80566 |
| H | -0.00047 | -1.53161 | 1.31010  |

val+07\_104

|   |          |          |          |
|---|----------|----------|----------|
| C | 0.34832  | 0.07306  | -0.01248 |
| C | -0.60792 | 1.13136  | -0.41232 |
| N | -1.08541 | 0.01426  | 0.48301  |
| O | -1.40077 | 0.23777  | 1.75911  |
| O | 0.73758  | -0.80344 | -0.99677 |

Supplementary Material (ESI) for PCCP  
This journal is © the Owner Societies 2011

|   |          |          |          |
|---|----------|----------|----------|
| H | 1.02191  | 0.25245  | 0.82219  |
| H | -0.98513 | 1.11534  | -1.43028 |
| H | -0.58634 | 2.08549  | 0.10041  |
| H | -1.63428 | -0.68809 | -0.03251 |
| H | 1.12373  | -1.59151 | -0.57777 |

val+07\_105

|   |          |          |          |
|---|----------|----------|----------|
| C | 0.56892  | 0.29094  | 0.34495  |
| C | -0.52603 | 1.10392  | -0.30409 |
| N | -0.81405 | -0.24764 | 0.22835  |
| O | -1.57554 | -0.49496 | 1.23823  |
| O | -0.93060 | -1.19290 | -0.90453 |
| H | 0.85025  | 0.51340  | 1.36798  |
| H | 1.30981  | -0.18057 | -0.28980 |
| H | -1.00575 | 1.88902  | 0.26844  |
| H | -0.53459 | 1.19718  | -1.38409 |
| H | -1.03440 | -2.02919 | -0.40923 |

val+07\_106

|   |          |          |          |
|---|----------|----------|----------|
| C | 0.41837  | -0.59136 | 0.33588  |
| C | 1.46980  | 0.20270  | 0.21066  |
| N | -0.86890 | -0.23285 | -0.30153 |
| O | -0.90905 | 0.84416  | -0.99310 |
| O | -1.86546 | -0.23498 | 0.90864  |
| H | 1.40188  | 1.11427  | -0.37214 |
| H | 2.40881  | -0.05052 | 0.68969  |
| H | -1.26986 | -1.06093 | -0.77215 |
| H | 0.36846  | -1.52405 | 0.88379  |
| H | -1.75404 | 0.69736  | 1.18066  |

val+07\_109

|   |          |          |          |
|---|----------|----------|----------|
| C | -0.94976 | 0.30612  | 0.47330  |
| C | 0.38334  | 0.28973  | 0.47645  |
| N | -1.73184 | -0.73708 | -0.19795 |
| O | -2.66132 | -0.21039 | -1.06887 |
| O | 1.07886  | -0.75301 | -0.06103 |
| H | 0.95596  | 1.10097  | 0.91629  |
| H | -1.55144 | 1.09803  | 0.89381  |
| H | -2.18129 | -1.32936 | 0.52112  |
| H | -1.06081 | -1.36421 | -0.67351 |
| H | 2.02000  | -0.52649 | -0.11422 |

val+07\_110

|   |          |          |          |
|---|----------|----------|----------|
| C | 0.48802  | 0.65243  | -0.49997 |
| C | -0.09881 | 1.56910  | 0.28503  |
| N | 0.53550  | -0.69185 | -0.01295 |
| O | -0.63114 | 1.29446  | 1.50085  |
| O | -0.09304 | -1.58272 | -0.98653 |
| H | 0.90015  | 0.90802  | -1.47315 |
| H | -0.18326 | 2.61703  | 0.01528  |
| H | -0.49022 | 0.33172  | 1.62796  |
| H | 1.49510  | -1.03487 | -0.00735 |
| H | -0.93230 | -1.80532 | -0.55096 |

val+07\_111

|   |          |          |          |
|---|----------|----------|----------|
| C | 1.90623  | -1.09920 | 1.21418  |
| C | -0.81566 | 0.91130  | -0.19867 |
| N | -0.84191 | -0.46911 | -0.66580 |
| O | 2.06847  | -2.19355 | 1.47430  |
| O | 0.50636  | 1.41437  | -0.21148 |
| H | -1.39314 | 1.61297  | -0.81796 |
| H | -1.24607 | 0.91994  | 0.81446  |
| H | -1.74215 | -0.89470 | -0.44935 |
| H | -0.74020 | -0.49602 | -1.67964 |
| H | 1.04155  | 0.76511  | 0.27986  |

val+07\_111

|   |          |          |          |
|---|----------|----------|----------|
| C | 0.34576  | 0.92280  | 0.29619  |
| C | -0.92731 | 1.18627  | 0.10656  |
| N | 0.27532  | -1.81585 | -0.35435 |
| O | 1.68016  | -2.05879 | -0.14194 |
| O | 1.50046  | 0.78678  | 0.49158  |
| H | -1.60177 | 0.40098  | -0.20347 |
| H | -1.28159 | 2.19855  | 0.26709  |
| H | -0.18992 | -2.50047 | 0.24457  |
| H | 1.99748  | -1.17736 | 0.12520  |
| H | 0.10841  | -2.13420 | -1.31073 |

|            |          |          |          |
|------------|----------|----------|----------|
| val+07_113 |          |          |          |
| C          | -0.38703 | -0.01180 | -0.30750 |
| C          | 0.55857  | 0.83684  | 0.21541  |
| N          | -0.09370 | -1.41789 | -0.07984 |
| O          | 1.25337  | -1.82522 | -0.45402 |
| O          | 1.61915  | 0.43546  | 0.81384  |
| H          | -1.19798 | 0.21206  | -0.98296 |
| H          | 0.38305  | 1.92024  | 0.09304  |
| H          | -0.17292 | -1.67362 | 0.91164  |
| H          | 1.73819  | -1.08359 | 0.03605  |
| H          | -0.71151 | -2.03618 | -0.60955 |

|            |          |          |          |
|------------|----------|----------|----------|
| val+07_114 |          |          |          |
| C          | 0.30840  | 2.16553  | 0.92521  |
| C          | -0.31026 | -1.52074 | 0.26744  |
| N          | -0.02976 | -0.82308 | -0.84835 |
| O          | -0.36912 | -1.05407 | 1.40565  |
| O          | 0.45641  | 2.07568  | -0.27997 |
| H          | 0.42541  | 3.13435  | 1.44351  |
| H          | -0.49123 | -2.59264 | 0.07009  |
| H          | 0.05337  | 1.28539  | 1.53917  |
| H          | -0.00031 | -1.28438 | -1.74677 |
| H          | 0.15799  | 0.17985  | -0.79788 |

|            |          |          |          |
|------------|----------|----------|----------|
| val+07_115 |          |          |          |
| C          | 0.32421  | 0.58645  | 0.27047  |
| C          | -0.94099 | 0.51428  | -0.22261 |
| N          | 0.97689  | -0.88613 | 0.25136  |
| O          | -1.46643 | -0.69153 | -0.73716 |
| O          | 1.07957  | 1.46955  | 0.70798  |
| H          | -1.55142 | 1.40607  | -0.32561 |
| H          | 1.84422  | -0.87394 | -0.28991 |
| H          | -2.16570 | -0.99900 | -0.13573 |
| H          | 0.30342  | -1.53758 | -0.16900 |
| H          | 1.21074  | -1.18199 | 1.20181  |

|            |          |          |          |
|------------|----------|----------|----------|
| val+07_116 |          |          |          |
| C          | 0.72763  | -0.10657 | -0.05873 |
| C          | -0.49797 | 0.37653  | 0.19183  |
| N          | 1.02305  | -1.43478 | -0.39680 |
| O          | -1.56247 | -0.50289 | 0.38954  |
| O          | 1.81554  | 0.72934  | -0.01261 |
| H          | -0.68019 | 1.43965  | 0.31965  |
| H          | 2.44767  | 0.41633  | -0.68374 |
| H          | 0.17809  | -2.00026 | -0.38032 |
| H          | -2.26402 | -0.27589 | -0.24228 |
| H          | 1.71368  | -1.84827 | 0.22816  |

|            |          |          |          |
|------------|----------|----------|----------|
| val+07_117 |          |          |          |
| C          | 0.70931  | 1.00152  | -0.06123 |
| C          | -0.46544 | 1.27906  | 0.66340  |
| N          | 0.38643  | -2.26882 | 0.04668  |
| O          | 0.98587  | 2.23387  | -0.17306 |
| O          | 1.43976  | 0.01140  | -0.42879 |
| H          | -1.30409 | 1.45715  | -0.02542 |
| H          | 0.96078  | -0.95840 | -0.21534 |
| H          | 1.10949  | -2.98824 | 0.06732  |
| H          | -0.09733 | -2.30602 | 0.94399  |
| H          | -0.28738 | -2.54241 | -0.66854 |

|            |          |          |          |
|------------|----------|----------|----------|
| val+07_118 |          |          |          |
| C          | -2.41930 | 0.89458  | -0.08797 |
| C          | 1.17795  | 0.65622  | -0.81993 |
| N          | 0.19873  | -1.36829 | 0.59830  |
| O          | -2.93084 | 1.84201  | -0.45427 |
| O          | 0.58241  | 1.66046  | -0.47830 |
| H          | 2.14621  | 0.36331  | -0.37600 |
| H          | 0.47333  | -1.40400 | 1.57962  |
| H          | -0.72210 | -0.93078 | 0.57854  |
| H          | 0.82787  | 0.00961  | -1.64356 |
| H          | 0.06055  | -2.33691 | 0.31026  |

|            |          |          |          |
|------------|----------|----------|----------|
| val+07_119 |          |          |          |
| C          | 0.22653  | 1.58711  | 0.67753  |
| C          | -1.05979 | 0.86050  | 0.29353  |
| N          | 0.81290  | -1.84730 | -0.89731 |

Supplementary Material (ESI) for PCCP  
This journal is © the Owner Societies 2011

|   |          |          |          |
|---|----------|----------|----------|
| O | -2.13858 | 1.37658  | 0.49826  |
| O | 1.32147  | 1.09900  | 0.48947  |
| H | 0.08124  | 2.58312  | 1.13698  |
| H | 1.25761  | -1.02157 | -0.49413 |
| H | 1.21903  | -1.95010 | -1.82771 |
| H | 1.16706  | -2.63924 | -0.36018 |
| H | -0.92505 | -0.13542 | -0.16852 |

val+07\_11

|   |          |          |          |
|---|----------|----------|----------|
| C | 1.08746  | 0.15391  | -1.78887 |
| C | -0.21001 | 1.06321  | 0.09402  |
| N | 0.39399  | 0.42091  | 1.21759  |
| O | 0.74646  | 1.18316  | -1.04859 |
| O | 0.47168  | -0.95156 | -1.32510 |
| H | -1.09483 | 0.56161  | -0.30324 |
| H | -0.43759 | 2.10442  | 0.31734  |
| H | 0.10767  | -0.54863 | 1.30374  |
| H | 0.19134  | 0.90736  | 2.08430  |
| H | 0.73723  | -1.68470 | -1.90429 |

val+07\_120

|   |          |          |          |
|---|----------|----------|----------|
| C | 0.51551  | 0.18366  | -0.70439 |
| C | -0.85591 | 0.70602  | -0.39556 |
| N | 0.81970  | -1.12359 | -0.04855 |
| O | 1.03659  | -0.70627 | 1.25474  |
| O | 1.38144  | 0.70934  | -1.35845 |
| H | -1.22569 | 0.29882  | 0.54546  |
| H | -1.53179 | 0.41343  | -1.20955 |
| H | -0.82861 | 1.79678  | -0.35193 |
| H | 1.65909  | -1.52736 | -0.49330 |
| H | 0.05637  | -1.81463 | -0.13486 |

val+07\_121

|   |          |          |          |
|---|----------|----------|----------|
| C | -0.04029 | 1.22608  | -0.51722 |
| C | 0.29731  | -1.25089 | -0.21207 |
| N | -0.27946 | 0.01545  | 0.29999  |
| O | -1.65738 | 0.11770  | 0.12285  |
| O | 0.36456  | 1.17422  | -1.65063 |
| H | -0.33624 | 2.11901  | 0.04112  |
| H | -0.18019 | -2.06064 | 0.33922  |
| H | 1.37801  | -1.25373 | -0.05097 |
| H | 0.06026  | -1.31389 | -1.27176 |
| H | -0.01037 | 0.14699  | 1.28556  |

val+07\_122

|   |          |          |          |
|---|----------|----------|----------|
| C | 0.54822  | 0.18741  | -0.03476 |
| C | -0.43391 | 1.06542  | 0.66339  |
| N | 0.16338  | -1.28788 | 0.30201  |
| O | 0.94173  | -2.12724 | -0.54383 |
| O | -0.61219 | 0.73507  | -0.71908 |
| H | -1.20696 | 0.67064  | 1.32831  |
| H | -0.15063 | 2.09648  | 0.88075  |
| H | 1.56781  | -1.43954 | -0.88521 |
| H | 0.39369  | -1.53378 | 1.27020  |
| H | -0.81934 | -1.52479 | 0.11092  |

val+07\_123

|   |          |          |          |
|---|----------|----------|----------|
| C | 0.40141  | -0.99808 | -0.21422 |
| C | -0.28373 | 1.42540  | 0.52734  |
| N | -0.61818 | 0.07964  | -0.23098 |
| O | -1.76702 | -0.22659 | -0.46848 |
| O | -0.20025 | 0.88259  | 1.71601  |
| H | 1.32318  | -0.61367 | 0.21335  |
| H | 0.01832  | -1.84723 | 0.35268  |
| H | -1.15096 | 2.06578  | 0.27995  |
| H | 0.63383  | 1.82101  | 0.04756  |
| H | 0.53740  | -1.28724 | -1.26051 |

val+07\_124

|   |          |          |          |
|---|----------|----------|----------|
| C | -0.47049 | 0.05786  | -0.15513 |
| C | 0.36722  | 1.25076  | -0.27640 |
| N | 0.11983  | -1.28077 | 0.10159  |
| O | -0.66295 | -2.27940 | -0.40608 |
| O | -0.19494 | 0.56704  | -1.43131 |
| H | -1.50174 | 0.07030  | 0.18771  |
| H | -0.06193 | 2.22592  | -0.05795 |
| H | 1.44854  | 1.17274  | -0.18162 |

Supplementary Material (ESI) for PCCP  
This journal is © the Owner Societies 2011

|            |          |          |          |
|------------|----------|----------|----------|
| H          | 0.26364  | -1.36677 | 1.12507  |
| H          | 1.07243  | -1.27490 | -0.30748 |
| val+07_125 |          |          |          |
| C          | 0.99691  | 0.73101  | -0.39329 |
| C          | -0.86790 | 0.51719  | 0.48472  |
| N          | 0.09566  | -0.47371 | -0.09616 |
| O          | -0.31626 | -1.11668 | -1.32523 |
| O          | -0.19123 | 1.61305  | -0.04060 |
| H          | 1.63799  | 0.73103  | 0.51159  |
| H          | -0.81439 | 0.42653  | 1.57946  |
| H          | -1.89374 | 0.37300  | 0.12480  |
| H          | 0.44800  | -1.20548 | 0.52593  |
| H          | -0.98455 | -1.77775 | -1.05170 |
| val+07_126 |          |          |          |
| C          | -0.03868 | -2.53069 | 1.77713  |
| C          | 0.27827  | 2.37255  | -0.22875 |
| N          | -0.12947 | -0.17800 | -0.84366 |
| O          | -0.01521 | -3.32728 | 2.58749  |
| O          | 1.45243  | 2.60356  | -0.01151 |
| H          | -0.17396 | 2.48859  | -1.22997 |
| H          | -0.43306 | 2.10761  | 0.57373  |
| H          | -0.09525 | -0.80914 | -0.04302 |
| H          | -0.97834 | -0.41717 | -1.35590 |
| H          | 0.64506  | -0.44933 | -1.44864 |
| val+07_128 |          |          |          |
| C          | -1.01775 | 0.89504  | -0.01704 |
| C          | 0.46650  | 0.57939  | 0.02250  |
| N          | 0.85211  | -0.68327 | -0.59355 |
| O          | 0.32658  | -1.74571 | 0.24518  |
| O          | -1.82021 | 0.26167  | -0.67323 |
| H          | -1.33291 | 1.77950  | 0.57515  |
| H          | 0.98511  | 1.39627  | -0.50395 |
| H          | 0.82447  | 0.60171  | 1.05755  |
| H          | 0.29619  | -0.78464 | -1.44539 |
| H          | 1.13522  | -2.21216 | 0.51248  |
| val+07_129 |          |          |          |
| C          | -0.87027 | -0.12563 | -1.20715 |
| C          | 0.04863  | -0.20818 | -0.07143 |
| N          | 0.82693  | 0.91886  | 0.30544  |
| O          | 1.01599  | 0.88098  | 1.73951  |
| O          | -1.38067 | -0.19761 | 0.14174  |
| H          | -1.02259 | 0.82932  | -1.71073 |
| H          | 0.53110  | -1.14998 | 0.17959  |
| H          | -1.04047 | -1.00534 | -1.82654 |
| H          | 0.28864  | 1.77207  | 0.14655  |
| H          | 1.98371  | 0.88451  | 1.82381  |
| val+07_130 |          |          |          |
| C          | -0.02256 | 2.28229  | 0.69192  |
| C          | -0.72140 | 1.39533  | 0.00079  |
| N          | 0.54968  | -1.74622 | -0.40080 |
| O          | 0.57969  | 3.08327  | 1.31558  |
| O          | -1.11268 | 0.19709  | 0.57098  |
| H          | -1.01781 | 1.65699  | -1.01411 |
| H          | 1.29800  | -1.35789 | -0.97386 |
| H          | -0.50186 | -0.52611 | 0.21506  |
| H          | 1.00475  | -2.28099 | 0.33830  |
| H          | 0.06419  | -2.42456 | -0.98686 |
| val+07_131 |          |          |          |
| C          | -0.16730 | -0.16477 | -0.66414 |
| C          | 1.11027  | 0.16316  | -0.11865 |
| N          | -1.14066 | -0.62647 | 0.14929  |
| O          | 2.06229  | 0.61718  | -0.76034 |
| O          | -2.31270 | 0.49330  | 0.89188  |
| H          | 1.21841  | -0.05492 | 0.96912  |
| H          | -0.43133 | 0.03821  | -1.69419 |
| H          | -0.84880 | -1.02997 | 1.03700  |
| H          | -1.89507 | -1.15707 | -0.27560 |
| H          | -1.72981 | 1.27385  | 0.92261  |
| val+07_134 |          |          |          |
| C          | -0.77906 | -0.81757 | -0.18036 |

Supplementary Material (ESI) for PCCP  
 This journal is © the Owner Societies 2011

|   |          |          |          |
|---|----------|----------|----------|
| C | 0.32501  | -0.01598 | 0.02325  |
| N | -2.03403 | -0.09278 | 0.06667  |
| O | 0.28783  | 1.19918  | 0.36947  |
| O | 1.55381  | -0.61971 | -0.17808 |
| H | -1.70641 | 0.85902  | 0.32505  |
| H | -2.65543 | -0.00944 | -0.74625 |
| H | -2.60168 | -0.45741 | 0.84051  |
| H | -0.83557 | -1.85563 | -0.45980 |
| H | 2.20004  | 0.08412  | 0.00554  |

val+07\_135

|   |          |          |          |
|---|----------|----------|----------|
| C | -0.50513 | -0.56020 | 0.58818  |
| C | -1.25909 | -0.56664 | -0.52341 |
| N | 0.74419  | 0.22928  | 0.63975  |
| O | 1.18650  | 0.72550  | -0.59154 |
| O | -0.97766 | 0.07935  | -1.65847 |
| H | -0.75497 | -1.08384 | 1.50066  |
| H | -2.18276 | -1.14284 | -0.53939 |
| H | 1.48624  | -0.35484 | 1.05109  |
| H | 0.62107  | 1.01177  | 1.30080  |
| H | -0.04599 | 0.49206  | -1.43767 |

val+07\_136

|   |          |          |          |
|---|----------|----------|----------|
| C | 0.02185  | 0.22265  | 0.81314  |
| C | 1.23779  | 0.41443  | -0.06354 |
| N | -1.01311 | -0.51168 | 0.27065  |
| O | -0.11096 | 0.71781  | 1.92830  |
| O | -0.71159 | -1.40742 | -0.77204 |
| H | 1.76914  | -0.53522 | -0.18654 |
| H | 1.89739  | 1.14233  | 0.41099  |
| H | 0.95754  | 0.76082  | -1.06288 |
| H | -1.66283 | -0.91817 | 0.93867  |
| H | -1.19293 | -1.05226 | -1.54026 |

val+07\_137

|   |          |          |          |
|---|----------|----------|----------|
| C | 1.12740  | -1.04374 | 0.25612  |
| C | -1.32929 | 0.85472  | -0.55155 |
| N | -0.94932 | -0.55594 | -0.66860 |
| O | -0.16595 | -0.87553 | 0.52889  |
| O | 1.71370  | -1.31336 | 1.41341  |
| H | -2.05028 | 1.05229  | -1.35121 |
| H | -1.78290 | 1.10844  | 0.41549  |
| H | -0.44515 | 1.47675  | -0.71383 |
| H | -1.78022 | -1.12287 | -0.49073 |
| H | 1.06860  | -1.32276 | 2.16222  |

val+07\_138

|   |          |          |          |
|---|----------|----------|----------|
| C | 0.84152  | -0.81675 | -0.26871 |
| C | -0.75165 | 1.20542  | 0.36196  |
| N | -0.44916 | -0.17701 | -0.04715 |
| O | -0.13116 | -0.33239 | -1.40061 |
| O | -1.47776 | -1.01731 | 0.40095  |
| H | 1.57442  | 0.00605  | -0.18585 |
| H | 0.00516  | 1.84835  | -0.08259 |
| H | -0.71776 | 1.24843  | 1.45109  |
| H | -1.74734 | 1.46102  | -0.00407 |
| H | -1.00188 | -1.87552 | 0.45308  |

val+07\_139

|   |          |          |          |
|---|----------|----------|----------|
| C | 0.59065  | -1.86194 | -0.80329 |
| C | -0.58172 | 0.16307  | 0.53655  |
| N | -0.46844 | -1.25889 | 0.06246  |
| O | -0.80764 | -1.38879 | -1.30336 |
| O | 0.07219  | 1.02638  | -0.32201 |
| H | 1.21612  | -0.97957 | -1.03691 |
| H | -0.10157 | 0.20955  | 1.51625  |
| H | -1.65581 | 0.36506  | 0.62743  |
| H | -0.99497 | -1.91380 | 0.64454  |
| H | -0.38232 | 0.97862  | -1.18175 |

val+07\_13

|   |          |          |          |
|---|----------|----------|----------|
| C | 0.10155  | -0.15196 | 0.14172  |
| C | -0.24361 | 2.29471  | 1.17235  |
| N | -0.08351 | -0.63440 | -1.07923 |
| O | -0.00007 | 2.31602  | 2.36680  |
| O | 0.50084  | -1.06202 | 1.03286  |
| H | -1.26260 | 2.13408  | 0.77658  |



Supplementary Material (ESI) for PCCP  
This journal is © the Owner Societies 2011

|   |          |          |          |
|---|----------|----------|----------|
| H | 0.51214  | 2.54700  | 0.40702  |
| H | -0.38815 | -0.01243 | -1.81620 |
| H | 0.05219  | -1.61246 | -1.35443 |
| H | 0.60563  | -1.97184 | 0.66513  |

val+07\_140

|   |          |          |          |
|---|----------|----------|----------|
| C | 1.54063  | -0.52051 | -0.14297 |
| C | -0.45126 | 0.73018  | -0.06041 |
| N | -1.61362 | 0.07775  | -0.55212 |
| O | 0.50618  | -0.17500 | 0.60364  |
| O | 2.24485  | -1.36922 | 0.62043  |
| H | 0.08797  | 1.21753  | -0.87423 |
| H | -0.71977 | 1.44987  | 0.71396  |
| H | -2.11472 | -0.40247 | 0.19187  |
| H | -1.37390 | -0.61041 | -1.26272 |
| H | 3.01743  | -1.63401 | 0.09474  |

val+07\_141

|   |          |          |          |
|---|----------|----------|----------|
| C | 0.96807  | -1.65919 | -0.44973 |
| C | -1.69895 | 1.51101  | 0.34094  |
| N | -0.19339 | -1.50640 | 0.04684  |
| O | -2.32344 | 2.55270  | 0.31492  |
| O | -1.89198 | 0.52084  | -0.51837 |
| H | 1.62869  | -2.49413 | -0.20363 |
| H | -0.91366 | 1.30968  | 1.09240  |
| H | 1.33974  | -0.92321 | -1.16357 |
| H | -1.26155 | -0.24953 | -0.30800 |
| H | -0.44113 | -2.25156 | 0.70280  |

val+07\_143

|   |          |          |          |
|---|----------|----------|----------|
| C | -0.47971 | -0.06049 | 1.17512  |
| C | 1.50567  | 0.49361  | -0.14189 |
| N | -2.30689 | -0.65388 | -0.10810 |
| O | -0.91209 | -0.23162 | -0.07823 |
| O | 0.78422  | 0.31678  | 1.11845  |
| H | 1.53661  | -0.44765 | -0.69348 |
| H | 1.02360  | 1.26359  | -0.74680 |
| H | 2.50932  | 0.80349  | 0.14638  |
| H | -2.69902 | 0.00045  | -0.78945 |
| H | -2.24180 | -1.54127 | -0.61288 |

val+07\_144

|   |          |          |          |
|---|----------|----------|----------|
| C | 1.02695  | 0.96383  | -0.14255 |
| C | -1.85746 | -0.48529 | 0.16928  |
| N | 0.41639  | -0.24946 | -0.23449 |
| O | 0.65462  | 1.90360  | 0.54272  |
| O | -0.53541 | -0.59713 | 0.72116  |
| H | 1.89410  | 1.00656  | -0.82725 |
| H | -2.07196 | 0.54819  | -0.12081 |
| H | -1.98134 | -1.15038 | -0.69244 |
| H | -2.52608 | -0.79316 | 0.97628  |
| H | 0.91899  | -1.05005 | -0.60540 |

val+07\_145

|   |          |          |          |
|---|----------|----------|----------|
| C | 0.93472  | -0.31457 | 0.04516  |
| C | 2.01275  | 0.18077  | -0.20151 |
| N | -0.28858 | -0.87797 | 0.21355  |
| O | -1.18820 | -0.00776 | 0.92649  |
| O | -3.05355 | 0.47374  | -1.03727 |
| H | 2.97276  | 0.61183  | -0.37371 |
| H | -1.87735 | 0.18085  | 0.24074  |
| H | -2.99407 | -0.29274 | -1.63084 |
| H | -0.25042 | -1.74867 | 0.74052  |
| H | -2.70206 | 1.20692  | -1.56842 |

val+07\_146

|   |          |          |          |
|---|----------|----------|----------|
| C | 0.19521  | -0.01966 | -0.61457 |
| C | 1.32163  | 0.16962  | -0.21909 |
| N | -1.12814 | -0.18799 | -0.93353 |
| O | -2.89684 | 0.59265  | 1.29699  |
| O | 2.60944  | 0.31421  | 0.04072  |
| H | -1.42832 | 0.39353  | -1.71401 |
| H | -3.05634 | -0.25092 | 1.74657  |
| H | -2.29835 | 0.34217  | 0.55905  |
| H | -1.37093 | -1.15663 | -1.13401 |
| H | 2.72864  | 0.65501  | 0.94587  |

| val+07_148 |          |          |          |
|------------|----------|----------|----------|
| C          | 0.21265  | 1.31422  | 0.64217  |
| C          | -0.98790 | 1.66088  | 0.23639  |
| N          | 0.27777  | -1.26302 | -0.48375 |
| O          | 1.29663  | 1.09806  | 1.05255  |
| O          | 1.59344  | -1.60374 | -0.00389 |
| H          | -1.36637 | 2.64179  | 0.50221  |
| H          | -1.58028 | 0.97400  | -0.35092 |
| H          | -0.31858 | -2.01520 | -0.13381 |
| H          | 1.84607  | -0.79551 | 0.47781  |
| H          | 0.33428  | -1.40910 | -1.49337 |

| val+07_149 |          |          |          |
|------------|----------|----------|----------|
| C          | -0.30721 | 0.64397  | -0.04065 |
| C          | 1.12399  | 0.34724  | 0.47411  |
| N          | -1.15419 | -0.77188 | -0.27864 |
| O          | -0.92093 | 1.62285  | -0.29905 |
| O          | 1.87109  | 1.38923  | 0.68083  |
| H          | -2.00810 | -0.75823 | 0.28622  |
| H          | -1.43458 | -0.83716 | -1.26127 |
| H          | -0.61191 | -1.60532 | -0.03676 |
| H          | 0.86752  | -0.33280 | 1.35346  |
| H          | 1.44731  | -0.41970 | -0.30566 |

| val+07_14 |          |          |          |
|-----------|----------|----------|----------|
| C         | 0.60073  | 2.93716  | -0.57339 |
| C         | -0.72727 | -1.49966 | -0.17767 |
| N         | -0.67545 | -0.26919 | 0.61154  |
| O         | 0.48522  | 3.95690  | -1.05889 |
| O         | 0.72198  | 0.07444  | 0.78166  |
| H         | -1.76528 | -1.85132 | -0.18263 |
| H         | -0.42728 | -1.28012 | -1.20694 |
| H         | -0.08121 | -2.29846 | 0.21578  |
| H         | -0.96752 | -0.49937 | 1.56246  |
| H         | 0.76648  | 0.95543  | 0.36997  |

| val+07_150 |          |          |          |
|------------|----------|----------|----------|
| C          | -0.56223 | 0.82620  | 0.44131  |
| C          | 0.63137  | 0.94714  | -0.47620 |
| N          | 0.21641  | -0.37746 | 0.03987  |
| O          | -0.46269 | -1.12164 | -1.04447 |
| O          | 0.90138  | -1.09600 | 0.86154  |
| H          | -1.55472 | 0.90552  | 0.01378  |
| H          | -0.44414 | 1.07462  | 1.48987  |
| H          | 0.46066  | 1.11631  | -1.53329 |
| H          | 1.57776  | 1.27768  | -0.06461 |
| H          | -0.74609 | -1.91345 | -0.54620 |

| val+07_151 |          |          |          |
|------------|----------|----------|----------|
| C          | 0.46205  | 0.49711  | 0.23009  |
| C          | 1.33041  | -0.48104 | 0.01640  |
| N          | -0.98269 | 0.27272  | 0.16740  |
| O          | -1.43988 | 0.96251  | -1.13067 |
| O          | -1.62533 | 0.70461  | 1.20470  |
| H          | 0.68425  | 1.51890  | 0.51065  |
| H          | 2.39557  | -0.29905 | 0.10909  |
| H          | 1.01870  | -1.48760 | -0.25004 |
| H          | -1.90296 | 1.71970  | -0.71972 |
| H          | -1.19092 | -0.70607 | -0.09231 |

| val+07_152 |          |          |          |
|------------|----------|----------|----------|
| C          | 1.28767  | -0.73797 | -0.11861 |
| C          | -0.65023 | 0.79028  | 0.17359  |
| N          | 0.21728  | -0.06312 | -0.61189 |
| O          | 1.98836  | -1.51126 | -0.75999 |
| O          | -1.91368 | 0.21700  | 0.44278  |
| H          | 1.47874  | -0.50364 | 0.94515  |
| H          | -0.85713 | 1.70588  | -0.38404 |
| H          | -0.10951 | 1.04904  | 1.09199  |
| H          | -1.77485 | -0.54527 | 1.02900  |
| H          | -0.04056 | -0.25584 | -1.57447 |

| val+07_153 |          |          |          |
|------------|----------|----------|----------|
| C          | -0.12504 | 0.45474  | 0.34543  |
| C          | 0.71845  | -0.69719 | -0.16331 |
| N          | -1.49614 | 0.53371  | -0.25554 |
| O          | 1.80423  | -0.95882 | 0.30885  |

Supplementary Material (ESI) for PCCP  
This journal is © the Owner Societies 2011

|   |          |          |          |
|---|----------|----------|----------|
| O | -2.19255 | 1.61010  | 0.21798  |
| H | 0.35401  | 1.41135  | 0.11734  |
| H | 0.30139  | -1.29128 | -1.00303 |
| H | -1.39482 | 0.56012  | -1.28537 |
| H | -0.26510 | 0.39275  | 1.42711  |
| H | -1.98493 | -0.35807 | -0.06257 |

val+07\_154

|   |          |          |          |
|---|----------|----------|----------|
| C | -0.03805 | -0.31861 | 0.27133  |
| C | 1.30900  | -0.37967 | -0.42632 |
| N | -0.84582 | 0.92460  | -0.15448 |
| O | -0.08113 | 0.11087  | 1.53029  |
| O | -2.04352 | 0.94525  | -0.35813 |
| H | -0.69292 | -1.16396 | -0.00155 |
| H | 1.89631  | -1.18010 | 0.03711  |
| H | 1.20224  | -0.59786 | -1.49411 |
| H | 1.85440  | 0.56048  | -0.29224 |
| H | -0.39442 | 1.79890  | 0.18391  |

val+07\_155

|   |          |          |          |
|---|----------|----------|----------|
| C | 0.30998  | -1.00293 | 0.41525  |
| C | -0.64618 | 1.25876  | -0.20012 |
| N | -0.73903 | -0.22174 | -0.26831 |
| O | 0.82957  | -1.96149 | -0.09536 |
| O | -1.76209 | -0.74418 | 0.50918  |
| H | 0.17293  | 1.61191  | -0.83119 |
| H | -1.60453 | 1.64952  | -0.54392 |
| H | -0.48810 | 1.53195  | 0.84332  |
| H | -0.79886 | -0.53110 | -1.24936 |
| H | 0.46191  | -0.61869 | 1.42963  |

val+07\_158

|   |          |          |          |
|---|----------|----------|----------|
| C | 1.39771  | -1.67763 | -0.69026 |
| C | -1.13639 | 1.01828  | 0.02035  |
| N | -0.30166 | 0.09131  | 0.80999  |
| O | 1.26688  | -1.49237 | -1.88181 |
| O | -0.43952 | 0.19780  | 2.00943  |
| H | 0.78771  | -2.41457 | -0.13470 |
| H | 2.15437  | -1.14171 | -0.08685 |
| H | -1.74953 | 0.40179  | -0.64735 |
| H | -1.74666 | 1.65697  | 0.66390  |
| H | -0.45431 | 1.60084  | -0.60981 |

val+07\_15

|   |          |          |          |
|---|----------|----------|----------|
| C | 0.23439  | -2.47647 | 0.57788  |
| C | 0.04422  | 1.98331  | 0.27041  |
| N | -0.06958 | -1.72906 | -0.45785 |
| O | 0.66898  | 1.19333  | -0.40286 |
| O | 0.41202  | 3.26588  | 0.35459  |
| H | -0.53773 | -2.04454 | -1.31253 |
| H | -0.85201 | 1.71775  | 0.85061  |
| H | -0.12110 | -3.50154 | 0.32423  |
| H | 0.16103  | -0.73198 | -0.45992 |
| H | -0.19993 | 3.75281  | 0.93545  |

val+07\_17

|   |          |          |          |
|---|----------|----------|----------|
| C | -0.27092 | -0.61589 | -0.51640 |
| C | -0.56744 | 0.57418  | 0.43911  |
| N | -0.24810 | -1.73339 | 0.10309  |
| O | -0.84472 | 0.14485  | 1.63302  |
| O | 0.75463  | 1.26673  | 0.34377  |
| H | -1.30871 | 1.24610  | -0.05339 |
| H | -0.03806 | -0.55050 | -1.57563 |
| H | 0.01696  | -2.63038 | -0.28998 |
| H | -0.49334 | -1.56169 | 1.11327  |
| H | 0.71010  | 1.88169  | -0.40956 |

val+07\_18

|   |          |          |          |
|---|----------|----------|----------|
| C | 1.09257  | 2.39866  | 1.43336  |
| C | -0.38730 | -0.50924 | -0.13233 |
| N | 0.54405  | -1.47126 | -0.68144 |
| O | 1.14605  | 1.58454  | 2.22842  |
| O | -0.08567 | 0.75567  | -0.72431 |
| H | -0.23442 | -0.47622 | 0.95597  |
| H | -1.44795 | -0.74870 | -0.31977 |
| H | 0.22223  | -1.79190 | -1.59309 |
| H | 0.58460  | -2.29099 | -0.07992 |

Supplementary Material (ESI) for PCCP  
This journal is © the Owner Societies 2011

|           |          |          |          |
|-----------|----------|----------|----------|
| H         | -0.86007 | 1.32693  | -0.59800 |
| val+07_19 |          |          |          |
| C         | 0.71571  | -0.37293 | -0.89016 |
| C         | -0.85109 | 1.18208  | 0.29898  |
| N         | -0.16118 | -0.02832 | 0.02693  |
| O         | 0.17525  | 0.75618  | 1.20304  |
| O         | -1.36008 | -1.22501 | 0.82814  |
| H         | 1.59104  | -0.92580 | -0.57222 |
| H         | -1.86800 | 1.06953  | 0.65507  |
| H         | -0.60251 | 2.03679  | -0.32480 |
| H         | 0.33816  | -0.44187 | -1.90336 |
| H         | -0.67180 | -1.85336 | 1.10919  |
| val+07_1  |          |          |          |
| C         | -0.58434 | 1.07808  | -0.37147 |
| C         | -1.26509 | 2.17137  | -0.55345 |
| N         | 0.07015  | 0.01471  | -0.17095 |
| O         | 1.14518  | -2.07720 | 1.22361  |
| O         | 0.75626  | -0.67974 | -1.05462 |
| H         | -2.31905 | 2.14184  | -0.82588 |
| H         | -0.80204 | 3.15056  | -0.44086 |
| H         | 0.10285  | -0.39694 | 0.78197  |
| H         | 0.48524  | -2.78828 | 1.24272  |
| H         | 1.23302  | -1.86400 | 0.26194  |
| val+07_21 |          |          |          |
| C         | -0.41872 | -1.04904 | 0.70268  |
| C         | -0.63443 | 1.06974  | -0.46897 |
| N         | -1.16621 | -0.22885 | -0.06609 |
| O         | 0.70324  | -0.75521 | 1.12070  |
| O         | 0.55371  | 0.96669  | -1.22187 |
| H         | -1.38047 | 1.56089  | -1.09404 |
| H         | -0.47259 | 1.66631  | 0.43709  |
| H         | -2.02129 | -0.58030 | -0.47754 |
| H         | -0.90382 | -2.01300 | 0.93073  |
| H         | 1.20769  | 0.58727  | -0.60699 |
| val+07_22 |          |          |          |
| C         | -0.03188 | -1.02156 | 0.10616  |
| C         | -1.37474 | 0.94959  | -0.34506 |
| N         | -1.20128 | -0.46151 | -0.15455 |
| O         | -0.48577 | 1.75851  | -0.28647 |
| O         | 2.34096  | 0.73286  | 0.30732  |
| H         | 1.61366  | 0.05865  | 0.26005  |
| H         | -2.42517 | 1.20467  | -0.55255 |
| H         | -2.07866 | -0.98338 | -0.24346 |
| H         | -0.21912 | -2.10451 | 0.19770  |
| H         | 1.83970  | 1.54297  | 0.12796  |
| val+07_23 |          |          |          |
| C         | -0.30238 | 0.21188  | 0.73848  |
| C         | -0.30956 | 1.08677  | -0.27429 |
| N         | 0.37896  | -1.05817 | 0.63567  |
| O         | 0.24593  | 1.00383  | -1.51191 |
| O         | 0.79653  | -0.30569 | -1.85654 |
| H         | -0.79649 | 2.05429  | -0.18591 |
| H         | -0.81922 | 0.48018  | 1.65715  |
| H         | 0.79710  | -0.78733 | -0.96220 |
| H         | 1.13563  | -1.12162 | 1.31687  |
| H         | -0.25380 | -1.83345 | 0.83286  |
| val+07_24 |          |          |          |
| C         | 2.27589  | 1.24699  | 0.34725  |
| C         | -1.30816 | 0.49839  | -0.05786 |
| N         | 0.28649  | -1.62402 | -0.11653 |
| O         | 2.54413  | 2.34990  | 0.41848  |
| O         | -0.71118 | 1.41680  | -0.58713 |
| H         | -2.01295 | -0.14654 | -0.61261 |
| H         | -1.24163 | 0.29274  | 1.02491  |
| H         | 0.40279  | -2.07426 | -1.02397 |
| H         | 1.09831  | -1.01917 | 0.00506  |
| H         | 0.37641  | -2.36543 | 0.57809  |
| val+07_25 |          |          |          |
| C         | 2.43079  | 0.06775  | -2.04078 |
| C         | -0.85857 | 1.66642  | 0.64618  |

Supplementary Material (ESI) for PCCP  
This journal is © the Owner Societies 2011

|   |          |          |          |
|---|----------|----------|----------|
| N | 0.84873  | -1.79297 | 0.11199  |
| O | 1.64938  | 0.89180  | -1.95467 |
| O | -1.00813 | 0.60472  | 1.21482  |
| H | -1.44087 | 2.56308  | 0.92822  |
| H | -0.13700 | 1.79417  | -0.18015 |
| H | 0.32751  | -2.17562 | -0.67717 |
| H | 0.26555  | -1.03623 | 0.47713  |
| H | 0.82092  | -2.52372 | 0.82411  |

val+07\_26

|   |          |          |          |
|---|----------|----------|----------|
| C | -0.36688 | -0.79900 | -0.17261 |
| C | -0.59940 | -2.22010 | -0.40054 |
| N | -0.18084 | 0.33032  | 0.00771  |
| O | 0.27824  | 3.13778  | 0.47550  |
| O | 1.52462  | 3.30528  | -0.25523 |
| H | -1.52651 | -2.36045 | -0.96368 |
| H | 0.23134  | -2.64677 | -0.96986 |
| H | -0.68123 | -2.74294 | 0.55665  |
| H | 0.10809  | 2.18167  | 0.31567  |
| H | 2.16506  | 3.31799  | 0.47878  |

val+07\_27

|   |          |          |          |
|---|----------|----------|----------|
| C | -0.64849 | 1.06681  | -0.58037 |
| C | -0.09780 | -1.36950 | -0.42190 |
| N | -0.19309 | -0.07961 | 0.31761  |
| O | 0.29384  | 1.92356  | -0.54470 |
| O | 1.48255  | 1.69045  | 0.26215  |
| H | -1.06170 | -1.59441 | -0.87981 |
| H | 0.66717  | -1.26829 | -1.19206 |
| H | 0.18433  | -2.15423 | 0.28043  |
| H | -0.85060 | -0.16179 | 1.09779  |
| H | 0.75779  | 0.32451  | 0.64475  |

val+07\_29

|   |          |          |          |
|---|----------|----------|----------|
| C | 0.93042  | 0.02775  | 0.90001  |
| C | -1.09649 | -0.65682 | -0.29524 |
| N | -0.05536 | 0.28661  | 0.10519  |
| O | -0.15402 | 1.55682  | -0.42268 |
| O | -1.26357 | 1.70845  | -1.27428 |
| H | 1.63758  | 0.81835  | 1.11626  |
| H | -2.06007 | -0.24301 | 0.00002  |
| H | -1.07513 | -0.74394 | -1.38103 |
| H | -0.89337 | -1.60759 | 0.19425  |
| H | 1.01851  | -0.96204 | 1.32330  |

val+07\_2

|   |          |          |          |
|---|----------|----------|----------|
| C | -0.47417 | 0.05421  | -0.33144 |
| C | -0.58478 | 1.32437  | 0.00027  |
| N | -0.28783 | -1.16142 | -0.48508 |
| O | 0.33177  | 2.26851  | -0.42516 |
| O | 1.35303  | -3.04102 | 1.09393  |
| H | -1.39824 | 1.63987  | 0.64870  |
| H | -0.77304 | -1.56421 | -1.29632 |
| H | 0.80026  | -2.39566 | 0.60443  |
| H | -0.15677 | 3.08101  | -0.63606 |
| H | 2.20036  | -3.00357 | 0.62513  |

val+07\_30

|   |          |          |          |
|---|----------|----------|----------|
| C | -1.93612 | 0.43786  | -0.36718 |
| C | 1.60612  | -0.02275 | -0.11021 |
| N | 0.82165  | -0.87491 | 0.59247  |
| O | -1.68380 | 1.51727  | -0.85674 |
| O | 2.03668  | 1.04479  | 0.30883  |
| H | -1.97224 | -0.49027 | -0.96923 |
| H | 1.80669  | -0.38466 | -1.13477 |
| H | 0.65241  | -0.69969 | 1.57542  |
| H | -2.15544 | 0.31451  | 0.71070  |
| H | 0.60704  | -1.79507 | 0.23302  |

val+07\_31

|   |          |          |          |
|---|----------|----------|----------|
| C | -0.06957 | -0.71320 | -0.62545 |
| C | 0.82992  | 0.23624  | -0.07603 |
| N | -1.43545 | -0.52166 | -0.02795 |
| O | 0.39853  | 1.56471  | 0.08834  |
| O | 0.73035  | 0.80234  | 1.34482  |
| H | 1.88039  | 0.12216  | -0.34602 |
| H | 0.22795  | -1.75706 | -0.55703 |

Supplementary Material (ESI) for PCCP  
This journal is © the Owner Societies 2011

|   |          |          |          |
|---|----------|----------|----------|
| H | -2.16894 | -0.95126 | -0.59472 |
| H | -1.55280 | -0.85929 | 0.93836  |
| H | -1.61778 | 0.48791  | -0.00302 |

val+07\_32

|   |          |          |          |
|---|----------|----------|----------|
| C | -0.29311 | -1.53182 | 0.32476  |
| C | -0.42205 | 0.77307  | -0.05031 |
| N | 0.31198  | -0.47902 | -0.04345 |
| O | 0.44867  | 1.82546  | 0.32833  |
| O | 1.46748  | 1.92433  | -0.70406 |
| H | 0.24147  | -2.48280 | 0.32298  |
| H | -0.81246 | 0.95298  | -1.05973 |
| H | -1.23662 | 0.82045  | 0.68531  |
| H | -1.34104 | -1.55416 | 0.65103  |
| H | 1.91100  | 1.05742  | -0.59148 |

val+07\_36

|   |          |          |          |
|---|----------|----------|----------|
| C | -0.50630 | 0.08560  | 1.50057  |
| C | 1.93541  | 1.48729  | -1.50536 |
| N | -0.69434 | -0.82139 | 0.62842  |
| O | 1.34371  | 2.29707  | -0.96499 |
| O | -0.03075 | -0.58088 | -2.16448 |
| H | -1.12770 | -1.65322 | 1.04067  |
| H | -0.26944 | -0.68515 | -1.21206 |
| H | -0.77295 | -0.00931 | 2.55758  |
| H | -0.04873 | 1.02741  | 1.19273  |
| H | 0.87631  | -0.91903 | -2.20469 |

val+07\_39

|   |          |          |          |
|---|----------|----------|----------|
| C | -1.31172 | 1.25486  | 1.25258  |
| C | 0.25222  | 2.70210  | -1.53441 |
| N | -0.36963 | -1.42059 | -0.41400 |
| O | -1.49292 | 0.88772  | 2.31442  |
| O | 0.38857  | 1.66161  | -1.97535 |
| H | -0.10666 | -0.61804 | -0.98492 |
| H | 1.84864  | -1.72571 | 2.22938  |
| H | -1.32442 | -1.64780 | -0.69234 |
| H | 0.20203  | -2.19420 | -0.75313 |
| H | 1.31779  | -1.61695 | 1.71818  |

val+07\_3

|   |          |          |          |
|---|----------|----------|----------|
| C | 1.03839  | -0.23514 | -0.46721 |
| C | -0.11568 | 0.41191  | -0.24922 |
| N | 1.00589  | -1.50623 | 0.39237  |
| O | -1.19266 | -0.01929 | 0.51346  |
| O | -0.41343 | 1.63926  | -0.81155 |
| H | 0.20976  | -1.54798 | 1.04898  |
| H | 0.96162  | -2.34705 | -0.18986 |
| H | 1.86743  | -1.59060 | 0.93650  |
| H | -1.58136 | 0.75675  | 0.95381  |
| H | 0.41283  | 1.92235  | -1.24108 |

val+07\_41

|   |          |          |          |
|---|----------|----------|----------|
| C | -0.49766 | 2.23175  | -0.02201 |
| C | 0.00605  | 1.02468  | 0.16683  |
| N | -0.35293 | -0.10471 | -0.65933 |
| O | -0.95655 | 3.29790  | -0.20105 |
| O | 1.33550  | -1.84732 | 0.84335  |
| H | 0.71810  | 0.87691  | 0.97294  |
| H | -0.09634 | 0.03210  | -1.63510 |
| H | -1.35003 | -0.30719 | -0.62624 |
| H | 0.71608  | -1.38773 | 0.22621  |
| H | 0.76147  | -2.09989 | 1.58250  |

val+07\_42

|   |          |          |          |
|---|----------|----------|----------|
| C | -0.81955 | -0.44948 | 0.38259  |
| C | -1.93406 | -1.35661 | 0.81109  |
| N | 2.30898  | 0.63371  | -0.10597 |
| O | -2.01428 | -0.07044 | 0.07332  |
| O | 2.15332  | 1.48247  | -1.27724 |
| H | -2.19433 | -2.21870 | 0.20595  |
| H | -2.32087 | -1.29920 | 1.82311  |
| H | 2.79325  | -0.18749 | -0.47688 |
| H | 1.35094  | 0.31425  | 0.07604  |
| H | 2.58640  | 2.30279  | -0.99422 |

val+07\_44

Supplementary Material (ESI) for PCCP  
This journal is © the Owner Societies 2011

|   |          |          |          |
|---|----------|----------|----------|
| C | 0.35407  | 1.03227  | -0.02327 |
| C | -0.97521 | 1.46999  | 0.07821  |
| N | 0.47602  | -0.31714 | -0.33530 |
| O | -1.97289 | 0.73769  | -0.13467 |
| O | 0.70990  | -1.24486 | 0.90667  |
| H | 1.24854  | 1.60189  | 0.17645  |
| H | -1.11298 | 2.54043  | 0.32535  |
| H | -0.44474 | -0.62156 | -0.69023 |
| H | 1.24802  | -0.57015 | -0.95258 |
| H | 0.73127  | -2.14453 | 0.51947  |

val+07\_46

|   |          |          |          |
|---|----------|----------|----------|
| C | -1.42610 | 1.01190  | 0.85038  |
| C | -0.08848 | 0.44827  | 0.11219  |
| N | -0.39069 | -0.98594 | -0.28441 |
| O | -2.33950 | 0.16464  | 0.69907  |
| O | 0.98566  | 0.50766  | 0.99889  |
| H | 0.08367  | 1.00703  | -0.81373 |
| H | -1.45019 | -0.99656 | -0.03971 |
| H | -0.22754 | -1.22715 | -1.26257 |
| H | 0.10964  | -1.64712 | 0.31283  |
| H | 1.81744  | 0.46717  | 0.49916  |

val+07\_47

|   |          |          |          |
|---|----------|----------|----------|
| C | -0.19141 | 0.33034  | -0.65608 |
| C | -1.22833 | 1.22691  | 0.00212  |
| N | -0.58342 | -0.75962 | 0.40048  |
| O | -1.75498 | -0.06180 | 0.77995  |
| O | 1.11323  | 0.76581  | -0.55250 |
| H | -2.05146 | 1.46116  | -0.69183 |
| H | -0.80720 | -1.70277 | 0.06601  |
| H | 0.08985  | -0.82036 | 1.17521  |
| H | -0.31276 | -0.13437 | -1.64173 |
| H | 1.03817  | 1.49010  | 0.10837  |

val+07\_48

|   |          |          |          |
|---|----------|----------|----------|
| C | -1.23298 | 0.90912  | 0.54295  |
| C | -0.07772 | 0.00555  | 0.18162  |
| N | -0.15289 | -1.25869 | 0.27639  |
| O | -2.30339 | 0.49883  | 0.94298  |
| O | -0.92333 | 2.20094  | 0.36608  |
| H | 0.83861  | 0.48215  | -0.16818 |
| H | 1.77331  | -3.67044 | -1.41394 |
| H | 1.37872  | -3.16179 | -1.04038 |
| H | -1.09061 | -1.51151 | 0.62100  |
| H | -1.70132 | 2.73882  | 0.61289  |

val+07\_49

|   |          |          |          |
|---|----------|----------|----------|
| C | -0.64625 | 1.18394  | 0.45092  |
| C | 0.04712  | -0.86906 | -0.63008 |
| N | 0.63178  | 1.69497  | -0.24339 |
| O | -0.45188 | -0.30022 | 0.43213  |
| O | -0.01410 | -2.19895 | -0.47609 |
| H | 1.52870  | 1.56367  | 0.25127  |
| H | 0.70798  | 1.15787  | -1.11925 |
| H | 0.53089  | 2.68691  | -0.46357 |
| H | -0.44923 | 1.39028  | 1.51242  |
| H | -0.43061 | -2.42091 | 0.39064  |

val+07\_4

|   |          |          |          |
|---|----------|----------|----------|
| C | 0.22425  | -0.65910 | -0.63942 |
| C | -1.17367 | 1.06321  | 0.35515  |
| N | -1.07576 | -0.16558 | -0.19594 |
| O | 1.16765  | -0.74036 | 0.40616  |
| O | -0.21652 | 1.82896  | 0.48523  |
| H | -2.19468 | 1.32791  | 0.67795  |
| H | -1.87008 | -0.79078 | -0.15291 |
| H | 0.08485  | -1.66437 | -1.03760 |
| H | 1.31439  | 0.18191  | 0.68421  |
| H | 0.58279  | 0.00020  | -1.43912 |

val+07\_50

|   |          |          |          |
|---|----------|----------|----------|
| C | 0.50291  | 1.82217  | 0.22155  |
| C | -1.74475 | -1.81498 | 0.35754  |
| N | -1.29149 | -1.00622 | -0.51392 |
| O | -0.00552 | 2.86653  | 0.56806  |
| O | 1.82907  | 1.62542  | 0.10937  |

Supplementary Material (ESI) for PCCP  
This journal is © the Owner Societies 2011

|   |          |          |          |
|---|----------|----------|----------|
| H | -0.04256 | 0.90363  | -0.04494 |
| H | -1.54734 | -1.61973 | 1.41437  |
| H | -2.33074 | -2.71321 | 0.13337  |
| H | -1.55156 | -1.31282 | -1.45791 |
| H | 2.27408  | 2.46161  | 0.35431  |

val+07\_51

|   |          |          |          |
|---|----------|----------|----------|
| C | 0.16948  | 0.67953  | 0.63645  |
| C | 0.69520  | -1.86100 | -0.02319 |
| N | 0.06865  | -0.50335 | -0.34723 |
| O | 0.73438  | 0.56227  | 1.68138  |
| O | -0.41316 | 1.80761  | 0.23019  |
| H | 1.74381  | -1.59976 | 0.19176  |
| H | 0.25482  | -2.10509 | 0.95673  |
| H | -0.92771 | -0.65514 | -0.53405 |
| H | 0.45728  | -0.18824 | -1.24186 |
| H | -0.82996 | 1.73406  | -0.64808 |

val+07\_52

|   |          |          |          |
|---|----------|----------|----------|
| C | -0.01632 | 1.40761  | 0.32460  |
| C | 1.07034  | 2.19215  | 0.39299  |
| N | 0.23641  | 0.12452  | -0.34462 |
| O | 0.28568  | -1.09127 | 0.53149  |
| O | -1.06544 | -1.40069 | 0.85396  |
| H | -1.06500 | 1.48126  | 0.61615  |
| H | 0.78955  | 3.15405  | 0.86343  |
| H | -0.41334 | -0.13740 | -1.09697 |
| H | 1.20703  | 0.19813  | -0.69065 |
| H | -1.24991 | -2.14036 | 0.23962  |

val+07\_53

|   |          |          |          |
|---|----------|----------|----------|
| C | -1.54441 | 2.17691  | -0.20090 |
| C | 0.42971  | 0.92783  | -0.25403 |
| N | -0.14574 | -0.17292 | -0.39747 |
| O | -0.23291 | 2.20215  | -0.14396 |
| O | 1.06883  | -2.85970 | -0.57598 |
| H | -1.80226 | 3.25282  | -0.09549 |
| H | 1.50145  | 1.08169  | -0.19188 |
| H | -1.16747 | -0.02041 | -0.42388 |
| H | 0.68556  | -1.95845 | -0.53982 |
| H | 0.99004  | -3.16802 | 0.33931  |

val+07\_54

|   |          |          |          |
|---|----------|----------|----------|
| C | -0.07895 | 1.65158  | -0.70348 |
| C | -0.01509 | -1.59354 | -0.76578 |
| N | 0.10487  | 1.20900  | 0.56239  |
| O | 0.77631  | 2.20330  | -1.38623 |
| O | -0.88518 | -2.14433 | 0.05408  |
| H | -1.10177 | 1.45741  | -1.07114 |
| H | 0.93681  | -1.67910 | -0.18362 |
| H | -0.65712 | 0.81463  | 1.09585  |
| H | 0.98825  | 1.36699  | 1.03078  |
| H | -1.76971 | -2.12544 | -0.36055 |

val+07\_56

|   |          |          |          |
|---|----------|----------|----------|
| C | -1.17078 | 0.29538  | 0.19010  |
| C | 1.24402  | 0.45078  | 0.29382  |
| N | 1.10635  | -1.07232 | 0.09918  |
| O | -0.09631 | 0.95469  | -0.14331 |
| O | -2.24538 | 1.00827  | -0.17454 |
| H | 1.85433  | 0.75557  | -0.56802 |
| H | 0.22561  | -1.33414 | 0.56615  |
| H | 1.88514  | -1.54985 | 0.55517  |
| H | 1.03284  | -1.42553 | -0.86818 |
| H | -1.96331 | 1.85724  | -0.59118 |

val+07\_57

|   |          |          |          |
|---|----------|----------|----------|
| C | 1.92460  | 1.66884  | -0.08459 |
| C | 0.67785  | 2.05539  | 0.04685  |
| N | 0.55410  | 0.78471  | -0.62933 |
| O | -1.60770 | -1.79619 | 1.39700  |
| O | -0.21901 | -1.66233 | 0.99954  |
| H | -0.08334 | 2.74956  | 0.36902  |
| H | 0.27926  | -0.05213 | -0.11318 |
| H | -2.03993 | -1.16560 | 0.79072  |
| H | 0.36950  | 0.75674  | -1.62748 |
| H | -0.10273 | -2.45789 | 0.44656  |



Supplementary Material (ESI) for PCCP  
This journal is © the Owner Societies 2011

val+07\_58  
C 0.63516 -0.02204 -0.18776  
C -0.01407 1.20110 0.02641  
N -0.24904 -1.10693 -0.30448  
O -1.26258 1.33657 0.09157  
O -0.38166 -2.04434 0.89389  
H 0.64678 2.08522 0.11118  
H -0.05012 -1.79092 -1.03607  
H -1.19316 -0.69617 -0.40899  
H 1.69447 -0.20538 -0.28018  
H -0.09038 -1.45111 1.61452

val+07\_59  
C 1.68537 0.21813 -0.59574  
C 0.41611 0.01691 -0.56228  
N 1.05533 -1.25436 -0.38072  
O -0.86631 0.35058 -0.55534  
O -0.97583 1.80747 -0.46522  
H 2.58868 0.68432 -0.24733  
H -0.39526 -3.42474 1.77115  
H -0.04945 -2.92920 1.33448  
H 1.09162 -1.73580 -1.28915  
H -1.25005 1.89620 0.46974

val+07\_60  
C 1.34684 0.25447 -0.82735  
C 0.37788 0.80572 -0.06447  
N -0.15244 -2.18447 0.01980  
O 0.25498 0.16096 1.06715  
O -0.45596 1.87446 -0.26961  
H -0.13004 -1.29429 0.64921  
H -1.10186 -2.47094 -0.22356  
H 0.34118 -2.96549 0.45433  
H 0.35517 -1.86196 -0.81938  
H -0.22165 2.29374 -1.11691

val+07\_61  
C -0.68942 1.04196 -0.01582  
C 0.59348 0.60458 -0.23539  
N 0.80145 -0.71291 0.27446  
O -0.88606 2.31096 -0.52756  
O 0.84017 -1.81375 -0.73140  
H 1.45944 1.03580 -0.73430  
H -0.00039 -0.90738 0.89173  
H 1.68483 -0.87822 0.76391  
H -1.79813 2.55329 -0.31302  
H 0.16203 -1.49982 -1.36362

val+07\_62  
C -0.30532 0.77064 0.03780  
C 0.94018 1.20402 0.15014  
N -0.58118 -0.57067 -0.52520  
O 0.41939 -1.26510 -0.92089  
O -1.40808 -1.26010 0.61375  
H -1.20650 1.29569 0.32878  
H 1.14600 2.17931 0.57645  
H -1.35926 -0.51383 -1.20290  
H 1.76691 0.58700 -0.18308  
H -0.66044 -1.63307 1.12134

val+07\_63  
C -0.25223 0.17100 0.05055  
C 0.99079 0.27699 0.56411  
N -0.77130 -1.22992 -0.00960  
O -1.18622 1.05239 -0.49588  
O 1.42386 1.62106 0.59970  
H -1.60747 -1.39286 0.56579  
H -1.00503 -1.54153 -0.96022  
H -0.00322 -1.80813 0.35161  
H -1.65239 1.49782 0.23246  
H 2.31102 1.58798 0.98068

val+07\_64  
C 0.18076 1.44035 0.49739  
C 0.29147 2.60185 0.17041  
N -0.03694 0.13730 0.80889

Supplementary Material (ESI) for PCCP  
This journal is © the Owner Societies 2011

|   |          |          |          |
|---|----------|----------|----------|
| O | 1.01081  | -0.71615 | 0.30978  |
| O | -0.45217 | -2.24109 | -1.45201 |
| H | 0.42347  | 3.62831  | -0.08659 |
| H | -1.30659 | -1.78086 | -1.49074 |
| H | -0.08722 | -0.02272 | 1.81354  |
| H | 0.52156  | -1.27953 | -0.34135 |
| H | -0.65636 | -3.07136 | -0.99133 |

val+07\_65

|   |          |          |          |
|---|----------|----------|----------|
| C | 0.19483  | 0.62690  | -0.45987 |
| C | -0.21422 | 1.71739  | -0.13648 |
| N | 0.60284  | -0.66000 | -0.70239 |
| O | -0.58617 | 2.97163  | 0.05161  |
| O | -0.17052 | -2.50014 | 1.47169  |
| H | 0.07441  | -1.87556 | 0.75377  |
| H | 0.17921  | -1.06305 | -1.53638 |
| H | 1.61482  | -0.75196 | -0.77182 |
| H | -1.05884 | 3.05338  | 0.89978  |
| H | 0.66113  | -2.61578 | 1.95558  |

val+07\_67

|   |          |          |          |
|---|----------|----------|----------|
| C | -2.29253 | -0.11127 | 0.90998  |
| C | 0.61586  | 1.85876  | -0.47849 |
| N | 0.46871  | -1.85071 | 0.21099  |
| O | -2.97749 | -0.92732 | 1.30980  |
| O | 1.51151  | 1.06080  | -0.66881 |
| H | 0.73972  | 2.93303  | -0.71103 |
| H | -0.36188 | 1.55428  | -0.06642 |
| H | 1.20125  | -2.29806 | 0.76307  |
| H | 0.85818  | -0.95156 | -0.08101 |
| H | 0.40446  | -2.40735 | -0.64178 |

val+07\_69

|   |          |          |          |
|---|----------|----------|----------|
| C | -1.13028 | 2.34998  | 1.10134  |
| C | 0.55843  | -1.08409 | 0.11053  |
| N | -0.34851 | -0.01696 | -0.40710 |
| O | -0.15651 | 2.61206  | 0.53875  |
| O | -1.45701 | 0.16280  | 0.37759  |
| H | -0.01705 | -2.00843 | 0.15034  |
| H | 1.42509  | -1.18937 | -0.54747 |
| H | 0.86236  | -0.78560 | 1.11344  |
| H | -0.61063 | -0.24783 | -1.37659 |
| H | 0.19262  | 0.86883  | -0.46802 |

val+07\_6

|   |          |          |          |
|---|----------|----------|----------|
| C | 0.21777  | -0.87877 | -0.22226 |
| C | -0.81948 | 1.26509  | 0.32527  |
| N | -0.77517 | -0.04491 | 0.13402  |
| O | 1.41027  | -0.30915 | -0.60342 |
| O | -2.01591 | -0.69084 | 0.32518  |
| H | -1.76597 | 1.76568  | 0.19135  |
| H | 0.12195  | 1.78937  | 0.38376  |
| H | 0.19848  | -1.87551 | 0.20647  |
| H | 1.95843  | -0.12002 | 0.18193  |
| H | -2.04037 | -1.34744 | -0.40141 |

val+07\_73

|   |          |          |          |
|---|----------|----------|----------|
| C | 0.31615  | 2.12237  | -0.87297 |
| C | -0.52728 | 1.22395  | -0.38895 |
| N | 0.67842  | -1.78114 | 0.69131  |
| O | -0.38189 | 0.73108  | 0.89549  |
| O | 1.05338  | 2.94162  | -1.29562 |
| H | -1.36402 | 0.91887  | -1.01599 |
| H | 0.79941  | -2.22353 | 1.60189  |
| H | 0.01078  | -0.19830 | 0.82419  |
| H | 1.59635  | -1.78541 | 0.24790  |
| H | 0.09399  | -2.41191 | 0.14366  |

val+07\_74

|   |          |          |          |
|---|----------|----------|----------|
| C | 1.58982  | 0.87990  | -0.64318 |
| C | 0.53873  | 0.50164  | 0.08612  |
| N | -1.99978 | -1.53062 | 0.27416  |
| O | 1.97297  | 1.88009  | 0.27823  |
| O | 0.81267  | 1.46486  | 1.08651  |
| H | -2.63323 | -1.45108 | -0.52150 |
| H | -1.73459 | -2.51493 | 0.31207  |
| H | -2.57994 | -1.37463 | 1.09863  |

Supplementary Material (ESI) for PCCP  
 This journal is © the Owner Societies 2011

|           |          |          |          |
|-----------|----------|----------|----------|
| H         | 2.13828  | 0.69281  | -1.55224 |
| H         | -0.30801 | -0.18373 | 0.14730  |
| val+07_75 |          |          |          |
| C         | -0.75008 | -0.96443 | -0.09787 |
| C         | -1.90628 | -0.36530 | 0.53294  |
| N         | 2.11600  | 0.65622  | -0.04444 |
| O         | -1.85488 | -0.09670 | -0.76724 |
| O         | -2.62598 | -0.11275 | 1.45975  |
| H         | -0.79100 | -2.00323 | -0.41691 |
| H         | 0.22690  | -0.46744 | -0.07108 |
| H         | 2.94430  | 0.07789  | 0.09722  |
| H         | 2.15105  | 1.36429  | 0.68904  |
| H         | 2.28267  | 1.15986  | -0.91571 |
| val+07_76 |          |          |          |
| C         | -0.55915 | -0.66977 | 0.11372  |
| C         | -0.66591 | 0.61409  | -0.24889 |
| N         | 0.71607  | -1.34898 | 0.12198  |
| O         | 0.28661  | 1.48978  | -0.66640 |
| O         | 1.58626  | 0.89033  | -0.96350 |
| H         | -1.46014 | -1.19875 | 0.41623  |
| H         | -1.61876 | 1.13587  | -0.21967 |
| H         | 0.68336  | -2.20334 | -0.43414 |
| H         | 0.97201  | -1.62960 | 1.06876  |
| H         | 1.50924  | -0.02554 | -0.53150 |
| val+07_78 |          |          |          |
| C         | 0.60092  | 0.37282  | 0.38020  |
| C         | -1.62502 | 1.02204  | -0.11120 |
| N         | 0.80100  | -1.15884 | 0.21097  |
| O         | -0.46211 | 0.61867  | -0.62234 |
| O         | -2.59439 | 1.27685  | -0.79605 |
| H         | 1.48644  | 0.74951  | -0.15454 |
| H         | -1.59312 | 1.10109  | 0.98947  |
| H         | 0.86427  | -1.50498 | -0.75917 |
| H         | 1.65971  | -1.43330 | 0.69554  |
| H         | 0.03740  | -1.67065 | 0.65853  |
| val+07_81 |          |          |          |
| C         | -1.11302 | -0.81499 | -0.42356 |
| C         | -1.50455 | 0.40077  | 0.41211  |
| N         | 2.24082  | 0.21240  | -0.35193 |
| O         | -1.95601 | -1.61355 | -0.77512 |
| O         | -0.68676 | 1.21798  | 0.78072  |
| H         | -2.58210 | 0.47556  | 0.65194  |
| H         | 2.69696  | 0.86775  | -0.98722 |
| H         | -0.03770 | -0.89851 | -0.66874 |
| H         | 1.50098  | 0.74565  | 0.10682  |
| H         | 2.93007  | 0.01894  | 0.37516  |
| val+07_83 |          |          |          |
| C         | 0.60554  | 0.67340  | -0.27197 |
| C         | -0.85789 | 0.32305  | -0.38076 |
| N         | 1.47681  | -0.23507 | -0.07352 |
| O         | -0.67688 | -1.72004 | 0.71412  |
| O         | -1.10116 | -1.06702 | -0.51770 |
| H         | 0.84162  | 1.74198  | -0.34996 |
| H         | -1.28316 | 0.77003  | -1.28851 |
| H         | -1.39876 | 0.73950  | 0.48271  |
| H         | 2.42017  | 0.15509  | -0.00889 |
| H         | 0.30109  | -1.63623 | 0.59539  |
| val+07_84 |          |          |          |
| C         | -0.12364 | 1.97842  | 0.37670  |
| C         | -0.05299 | -2.46620 | 0.01828  |
| N         | 0.18033  | 1.12399  | -0.61985 |
| O         | 0.27413  | 3.13712  | 0.47344  |
| O         | -0.79146 | -1.70550 | -0.57530 |
| H         | -0.79215 | 1.52073  | 1.12968  |
| H         | -0.28989 | -3.54000 | 0.11623  |
| H         | 0.88692  | -2.12587 | 0.48744  |
| H         | -0.18232 | 0.17171  | -0.63836 |
| H         | 0.78855  | 1.43200  | -1.36816 |
| val+07_85 |          |          |          |
| C         | 0.51048  | -1.46456 | 0.15842  |

Supplementary Material (ESI) for PCCP  
This journal is © the Owner Societies 2011

|   |          |          |          |
|---|----------|----------|----------|
| C | 0.33060  | -0.30670 | -0.45066 |
| N | -0.77876 | 0.55880  | -0.28348 |
| O | 1.40122  | -2.46098 | 0.39013  |
| O | -0.00472 | -2.36374 | 1.03523  |
| H | 1.13010  | 0.04682  | -1.09285 |
| H | -1.16119 | 0.84044  | -1.18350 |
| H | -1.11492 | 3.85237  | 0.84769  |
| H | -1.52913 | 0.13148  | 0.25322  |
| H | -0.99718 | 3.14936  | 0.63172  |

val+07\_86

|   |          |          |          |
|---|----------|----------|----------|
| C | -0.46732 | 0.69234  | -0.92504 |
| C | 0.24415  | -0.58809 | -0.51404 |
| N | 0.66751  | -0.62396 | 0.88226  |
| O | -0.38508 | 1.19250  | -2.02743 |
| O | 1.43775  | 0.58098  | 1.12278  |
| H | -1.10421 | 1.14702  | -0.13440 |
| H | 1.10696  | -0.74763 | -1.16758 |
| H | -0.45367 | -1.42602 | -0.66184 |
| H | -0.15130 | -0.49427 | 1.47954  |
| H | 2.32132  | 0.23123  | 1.32364  |

val+07\_87

|   |          |          |          |
|---|----------|----------|----------|
| C | 0.56712  | 0.80137  | 0.68558  |
| C | -0.45018 | -1.35481 | 0.40778  |
| N | 0.32029  | -0.22501 | -0.32512 |
| O | -0.53846 | 1.55147  | 1.00462  |
| O | 0.66908  | 2.11609  | 0.25966  |
| H | -0.28259 | -2.22396 | -0.24422 |
| H | -1.49874 | -1.06099 | 0.25753  |
| H | 1.22422  | -0.58828 | -0.64180 |
| H | -0.11840 | 0.22630  | -1.14352 |
| H | 1.21408  | 0.44172  | 1.48009  |

val+07\_88

|   |          |          |          |
|---|----------|----------|----------|
| C | 1.09568  | 0.04618  | 0.36288  |
| C | -1.09982 | -0.82552 | -0.28895 |
| N | -0.20025 | 0.10230  | -0.30938 |
| O | 0.59806  | 2.17484  | -0.98091 |
| O | -0.46437 | 1.25368  | -1.02084 |
| H | 1.15694  | 0.88743  | 1.05252  |
| H | 1.87346  | 0.15980  | -0.39139 |
| H | -0.90805 | -1.73089 | 0.26782  |
| H | -2.02080 | -0.66061 | -0.83348 |
| H | 1.16374  | -0.91002 | 0.87883  |

val+07\_89

|   |          |          |          |
|---|----------|----------|----------|
| C | 1.69167  | 0.07617  | 0.11974  |
| C | -1.91764 | 0.36617  | -1.01789 |
| N | 0.81841  | -0.48460 | 0.97617  |
| O | 1.39593  | 0.64186  | -0.93352 |
| O | -2.01336 | -0.22637 | 0.04142  |
| H | 2.74082  | -0.01635 | 0.45345  |
| H | -2.81304 | 0.61212  | -1.61679 |
| H | -0.18389 | -0.46581 | 0.77940  |
| H | 1.14541  | -0.93197 | 1.82102  |
| H | -0.93659 | 0.67699  | -1.41480 |

val+07\_8

|   |          |          |          |
|---|----------|----------|----------|
| C | 0.57128  | -0.34721 | 0.35297  |
| C | -1.49977 | 0.85677  | -0.11381 |
| N | -0.72347 | -0.22918 | -0.01126 |
| O | 1.27231  | 0.83122  | 0.44252  |
| O | 1.20788  | -1.41952 | -0.27322 |
| H | -1.08266 | 1.81171  | 0.16760  |
| H | -2.56395 | 0.70542  | -0.21557 |
| H | -1.15744 | -1.12468 | -0.22208 |
| H | 1.37728  | 1.21865  | -0.45727 |
| H | 1.78475  | -1.84090 | 0.38310  |

val+07\_90

|   |          |          |          |
|---|----------|----------|----------|
| C | -0.23725 | -0.81895 | -0.03955 |
| C | -1.16559 | -1.60951 | 0.43687  |
| N | 0.60030  | 0.00382  | -0.42209 |
| O | 0.96817  | 2.71908  | 0.40604  |
| O | 2.41940  | 2.77311  | 0.32031  |
| H | -0.96362 | -2.23817 | 1.29781  |

Supplementary Material (ESI) for PCCP  
This journal is © the Owner Societies 2011

|   |          |          |          |
|---|----------|----------|----------|
| H | -2.13937 | -1.66274 | -0.03868 |
| H | 2.65989  | 2.70713  | 1.26199  |
| H | 0.81049  | 1.77992  | 0.13471  |
| H | 1.25187  | -0.32899 | -1.13930 |

val+07\_91

|   |          |          |          |
|---|----------|----------|----------|
| C | 0.08299  | 0.76628  | -0.07570 |
| C | -0.84830 | 1.71690  | -0.16916 |
| N | 0.66160  | -2.44094 | -0.01647 |
| O | 0.09456  | 2.76470  | -0.07338 |
| O | 1.12613  | 1.71716  | 0.03010  |
| H | -1.90524 | 1.90034  | -0.27590 |
| H | 1.03768  | -2.76165 | 0.87591  |
| H | 0.26591  | -0.30908 | -0.05782 |
| H | -0.16920 | -3.00982 | -0.18019 |
| H | 1.33777  | -2.74099 | -0.71890 |

val+07\_92

|   |          |          |          |
|---|----------|----------|----------|
| C | -1.08153 | 0.30090  | -0.13870 |
| C | 0.31727  | 0.92199  | 0.10771  |
| N | -1.32543 | -0.82631 | 0.41440  |
| O | 0.48179  | 2.03466  | -0.42290 |
| O | 1.05821  | 0.19540  | 0.81157  |
| H | -1.84705 | 0.77900  | -0.74395 |
| H | 2.12164  | -1.67486 | -0.53554 |
| H | -2.20497 | -1.33142 | 0.33182  |
| H | 2.43974  | -2.22981 | -0.91665 |
| H | -0.55157 | -1.21355 | 0.96896  |

val+07\_93

|   |          |          |          |
|---|----------|----------|----------|
| C | -0.98092 | 0.48292  | 0.85386  |
| C | 0.15695  | 0.57122  | -0.21618 |
| N | 0.68769  | -0.82594 | -0.38054 |
| O | -1.54823 | 1.54921  | 1.14028  |
| O | -1.17886 | -0.68952 | 1.29586  |
| H | -0.22771 | 0.92922  | -1.17117 |
| H | 0.96081  | 1.22897  | 0.11456  |
| H | 0.57503  | -1.20529 | -1.32262 |
| H | 1.66810  | -0.92885 | -0.11200 |
| H | 0.05743  | -1.34072 | 0.30825  |

val+07\_95

|   |          |          |          |
|---|----------|----------|----------|
| C | 1.47062  | -1.74209 | 0.35966  |
| C | 1.40231  | -0.53653 | -0.18319 |
| N | -1.57570 | 1.13244  | -0.11948 |
| O | 0.50924  | -0.26524 | -1.20437 |
| O | 1.54860  | -2.82317 | 0.82707  |
| H | 2.10105  | 0.22183  | 0.16757  |
| H | -2.09898 | 0.58969  | 0.56670  |
| H | -1.27590 | 1.98219  | 0.35737  |
| H | -2.25012 | 1.42492  | -0.82597 |
| H | -0.26331 | 0.25196  | -0.80615 |

val+07\_98

|   |          |          |          |
|---|----------|----------|----------|
| C | -0.85719 | 0.28196  | 0.06956  |
| C | 0.45415  | 0.04752  | 0.14034  |
| N | 0.99738  | -1.29972 | -0.06454 |
| O | 1.90131  | -1.35358 | -1.09934 |
| O | -1.47605 | 1.48172  | 0.19772  |
| H | 1.22519  | 0.79251  | 0.29265  |
| H | -1.57824 | -0.51112 | -0.11149 |
| H | 1.42747  | -1.61131 | 0.82308  |
| H | 0.20255  | -1.94848 | -0.20449 |
| H | -0.81917 | 2.17699  | 0.37624  |

val+07\_9

|   |          |          |          |
|---|----------|----------|----------|
| C | 1.29420  | 2.46624  | 0.43760  |
| C | 0.03476  | 2.56162  | -0.52244 |
| N | 0.58114  | 1.43224  | 0.16314  |
| O | -0.89574 | -1.63349 | -0.37318 |
| O | 0.21416  | -1.41459 | 0.53750  |
| H | -0.89507 | 2.98421  | -0.14419 |
| H | 0.18646  | 2.62347  | -1.59917 |
| H | 0.46945  | 0.42218  | 0.33050  |
| H | -0.62460 | -2.47740 | -0.78109 |
| H | -0.20686 | -1.60367 | 1.39784  |
